# Supplementary material for: Leading edge maintenance in migrating cells is an emergent property of branched actin network growth
Source: eLife journal article supplement (doi:10.7554/elife.74389), 2022-03-10
Supplement: fig2-data1 [file Figure 2-Source Data 1.xlsx]

## Sheet: One sim - Mean fil density
0.34
0.38235
0.40355
0.39525
0.3759
0.35
0.3266
0.30385
0.28655
0.26915
0.2549
0.25005
0.24755
0.2476
0.255
0.2618
0.2686
0.27595
0.28055
0.2843
0.29205
0.2965
0.29815
0.3024
0.30195
0.3038
0.30505
0.30265
0.30245
0.3017
0.3031
0.3049
0.30775
0.3099
0.30645
0.3098
0.3109
0.3091
0.3064
0.3027
0.29835
0.2921
0.2912
0.2909
0.2882
0.28515
0.28385
0.2857
0.2859
0.28955
0.29005
0.29405
0.29545
0.295
0.29795
0.30005
0.30095
0.30165
0.2972
0.29635
0.295
0.29705
0.29825
0.2975
0.2971
0.29615
0.2974
0.2942
0.2926
0.292
0.29205
0.29545
0.29755
0.30055
0.3041
0.3024
0.3013
0.29635
0.2918
0.2904
0.28545
0.2823
0.28155
0.2798
0.27715
0.2792
0.27995
0.2803
0.28245
0.2859
0.28985
0.29195
0.29005
0.29045
0.2947
0.2934
0.29365
0.292
0.295
0.293
0.29025
0.2889
0.2868
0.2872
0.28365
0.282
0.28105
0.28235
0.2817
0.2808
0.2771
0.27815
0.276
0.27715
0.2766
0.27605
0.2771
0.28055
0.2852
0.28645
0.28765
0.28455
0.28365
0.28175
0.28105
0.2832
0.2822
0.2836
0.28565
0.2872
0.2843
0.2876
0.28865
0.28985
0.28765
0.2932
0.29615
0.29655
0.29565
0.2937
0.29505
0.2911
0.2888
0.2867
0.2838
0.2842
0.28425
0.28845
0.286
0.28345
0.2782
0.27775
0.27585
0.2728
0.2745
0.2767
0.27445
0.27275
0.2695
0.27105
0.2749
0.2785
0.27935
0.2813
0.28595
0.28595
0.28795
0.2907
0.291
0.28585
0.2875
0.2863
0.2852
0.2822
0.2847
0.28715
0.28765
0.28605
0.2886
0.28965
0.2884
0.28925
0.29035
0.2899
0.2894
0.28795
0.28475
0.2843
0.28675
0.28545
0.2892
0.28745
0.2902
0.2911
0.2891
0.28705
0.2867
0.28575
0.28795
0.2849
0.28595
0.28625
0.28655
0.28675
0.29005
0.2903
0.29055
0.2913
0.2895
0.28635
0.284
0.28165
0.28545
0.2853
0.2882
0.2896
0.28965
0.2883
0.287
0.2851
0.28345
0.2838
0.28285
0.28165
0.27745
0.2766
0.277
0.27595
0.27645
0.27205
0.27505
0.27495
0.28115
0.2799
0.2807
0.282
0.28185
0.2827
0.28165
0.2848
0.28135
0.28165
0.2817
0.2814
0.284
0.2853
0.28635
0.2853
0.2802
0.28165
0.28025
0.27905
0.28135
0.2805
0.2776
0.27775
0.2763
0.27795
0.2823
0.2826
0.28145
0.28345
0.281
0.28445
0.2811
0.2812
0.28285
0.28345
0.28545
0.2881
0.2881
0.28945
0.2868
0.2855
0.28415
0.2832
0.281
0.28335
0.2809
0.2805
0.28165
0.282
0.2798
0.2787
0.27735
0.2814
0.2881
0.2876
0.2899
0.2915
0.29475
0.2949
0.29445
0.29215
0.28965
0.29085
0.29045
0.29195
0.2884
0.29035
0.28845
0.28565
0.28265
0.28465
0.28145
0.2843
0.28385
0.28165
0.27935
0.276
0.27835
0.2751
0.2778
0.27875
0.2788
0.2761
0.2765
0.2815
0.28375
0.2819
0.28095
0.28235
0.27925
0.27895
0.28195
0.28255
0.28625
0.28915
0.2915
0.2946
0.29725
0.2981
0.2933
0.2882
0.28565
0.287
0.2881
0.28525
0.2861
0.2854
0.29
0.2879
0.29065
0.29045
0.29165
0.28975
0.28655
0.28485
0.2808
0.27915
0.2788
0.2786
0.27765
0.27815
0.27985
0.2805
0.28205
0.28265
0.2835
0.28075
0.28515
0.28585
0.2862
0.2882
0.2917
0.28815
0.28705
0.2901
0.2892
0.28815
0.2923
0.29505
0.2958
0.2931
0.2968
0.29295
0.29185
0.28545
0.2838
0.28335
0.28275
0.27795
0.2759
0.27435
0.2782
0.28025
0.2837
0.2833
0.2824
0.28075
0.28485
0.2857
0.29125
0.28715
0.28785
0.2868
0.2858
0.2849
0.2858
0.28225
0.28055
0.27895
0.2786
0.2796
0.277
0.2808
0.2812
0.2817
0.28045
0.2782
0.27635
0.27445
0.27455
0.27375
0.2762
0.27245
0.2688
0.27055
0.2714
0.27225
0.2691
0.26735
0.2703
0.27385
0.2724
0.2725
0.2749
0.2794
0.28015
0.28235
0.2845
0.28715
0.2937
0.2944
0.29495
0.29365
0.2908
0.28845
0.2881
0.28575
0.2805
0.2797
0.2781
0.27195
0.269
0.269
0.2708
0.2675
0.27045
0.2736
0.27255
0.2753
0.27655
0.275
0.2749
0.27585
0.2738
0.27375
0.27305
0.2754
0.28065
0.28165
0.2844
0.28305
0.27915
0.2819
0.2847
0.285
0.28845
0.28685
0.28465
0.28475
0.2862
0.2848
0.28215
0.28165
0.28095
0.2779
0.273
0.27635
0.277
0.2724
0.27215
0.27165
0.27
0.26705
0.26725
0.26865
0.27065
0.2741
0.276
0.27585
0.27925
0.28045
0.27985
0.2796
0.2816
0.28265
0.2861
0.2887
0.28815
0.2908
0.29005
0.2876
0.28855
0.2918
0.29205
0.2933
0.2907
0.29065
0.2932
0.29525
0.2952
0.29425
0.29015
0.28945
0.29255
0.2918
0.28825
0.2864
0.28575
0.28115
0.27915
0.28185
0.28335
0.2822
0.2843
0.28805
0.28845
0.2862
0.2884
0.29085
0.2936
0.2943
0.2925
0.289
0.287
0.28735
0.288
0.2884
0.28555
0.28695
0.28725
0.28255
0.27795
0.27905
0.27945
0.27895
0.27765
0.27635
0.27945
0.28085
0.2844
0.2871
0.28665
0.29
0.2889
0.29215
0.2872
0.2883
0.28415
0.28405
0.28305
0.28235
0.2866
0.287
0.28275
0.28295
0.28635
0.28845
0.29165
0.2945
0.295
0.2932
0.2932
0.29535
0.2948
0.2965
0.29715
0.29465
0.2945
0.29735
0.29255
0.2909
0.2908
0.29255
0.2933
0.29525
0.29365
0.294
0.29255
0.2927
0.2943
0.2917
0.29435
0.29375
0.2914
0.2889
0.2875
0.28615
0.2837
0.28255
0.28145
0.2805
0.28215
0.27975
0.27635
0.27655
0.2788
0.27955
0.28115
0.2833
0.2852
0.2878
0.28425
0.28485
0.2858
0.28675
0.28875
0.2903
0.29175
0.2942
0.29755
0.2991
0.2997
0.3041
0.3051
0.30175
0.3041
0.3021
0.3003
0.29745
0.2999
0.29665
0.29385
0.29025
0.2865
0.2853
0.28605
0.2847
0.2871
0.287
0.28945
0.29135
0.29445
0.2919
0.28945
0.28715
0.28395
0.28245
0.2873
0.28925
0.2901
0.29575
0.29885
0.29565
0.2959
0.29905
0.29675
0.29595
0.2935
0.2961
0.2967
0.2959
0.2953
0.2943
0.2968
0.2968
0.2976
0.2927
0.2902
0.2877
0.2856
0.28275
0.2856
0.2877
0.2909
0.29165
0.29355
0.2958
0.29405
0.2939
0.2911
0.29365
0.29025
0.29405
0.29715
0.298
0.2971
0.29705
0.30065
0.30205
0.3011
0.30045
0.3028
0.3027
0.3015
0.29465
0.29085
0.29125
0.2912
0.29255
0.29025
0.28905
0.28585
0.28475
0.283
0.27865
0.2792
0.2799
0.28015
0.28105
0.28245
0.28175
0.28325
0.2826
0.28395
0.28605
0.2879
0.2874
0.2843
0.28265
0.27945
0.27725
0.279
0.2764
0.2721
0.27025
0.26935
0.2716
0.26955
0.2702
0.2747
0.2767
0.2822
0.28695
0.28685
0.2843
0.285
0.2824
0.2823
0.28195
0.2845
0.28275
0.28095
0.2816
0.2804
0.2806
0.2832
0.28425
0.28395
0.2835
0.28295
0.28055
0.27885
0.2779
0.279
0.2824
0.2802
0.28165
0.2846
0.28145
0.28475
0.2856
0.2873
0.28665
0.28855
0.2894
0.29155
0.29305
0.29085
0.29145
0.2885
0.2904
0.29045
0.28705
0.28245
0.28435
0.28605
0.2841
0.28635
0.28805
0.2889
0.2891
0.2925
0.28935
0.2873
0.2918
0.2909
0.2917
0.2886
0.2858
0.28565
0.2841
0.288
0.2901
0.2915
0.2881
0.2867
0.28315
0.27815
0.27255
0.2758
0.27665
0.2775
0.27505
0.2773
0.28005
0.28205
0.28355
0.2851
0.28545
0.28545
0.2867
0.29045
0.29315
0.2938
0.2962
0.2986
0.29815
0.29575
0.29855
0.29395
0.2896
0.2853
0.28575
0.2838
0.28375
0.28195
0.28445
0.28625
0.2909
0.2904
0.28945
0.2926
0.2903
0.29215
0.292
0.29035
0.2934
0.2964
0.2968
0.29745
0.29675
0.29145
0.29285
0.2919
0.29135
0.29085
0.28825
0.28835
0.2935
0.2925
0.29295
0.29175
0.28945
0.2912
0.2948
0.2982
0.29515
0.2921
0.2938
0.2935
0.2904
0.29165
0.29
0.28885
0.2905
0.2956
0.29665
0.29925
0.29845
0.29695
0.29385
0.29545
0.2948
0.29445
0.29205
0.2915
0.2919
0.2923
0.29495
0.2947
0.2937
0.29465
0.295
0.29555
0.2912
0.29315
0.2952
0.2931
0.2921
0.2901
0.2873
0.28605
0.2887
0.293
0.2907
0.2923
0.29595
0.29635
0.29505
0.29485
0.29395
0.2911
0.2924
0.28995
0.28745
0.28565
0.2829
0.2847
0.28805
0.28755
0.28975
0.28995
0.292
0.29735
0.29705
0.29475
0.29255
0.28915
0.2865
0.28465
0.2819
0.2776
0.27975
0.2824
0.28315
0.2866
0.28555
0.2839
0.2851
0.2848
0.28735
0.2881
0.286
0.2852
0.2897
0.293
0.2949
0.2975
0.29805
0.29715
0.2972
0.29845
0.2989
0.2951
0.2951
0.29475
0.2935
0.29275
0.29485
0.30025
0.2971
0.29705
0.2936
0.289
0.28565
0.28285
0.28265
0.28455
0.28325
0.2816
0.2846
0.2824
0.2827
0.28215
0.28135
0.2854
0.2837
0.29045
0.294
0.29715
0.2988
0.3008
0.29965
0.30065
0.3014
0.29865
0.29415
0.2917
0.2874
0.2873
0.28885
0.2862
0.28325
0.28075
0.2794
0.2757
0.27605
0.27935
0.28365
0.28695
0.2867
0.28895
0.28885
0.2912
0.2959
0.29715
0.2933
0.29115
0.2893
0.28815
0.285
0.29065
0.29215
0.29285
0.29515
0.2951
0.2963
0.29675
0.29595
0.29455
0.29635
0.3
0.30005
0.2993
0.3041
0.30305
0.3065
0.3024
0.30035
0.2945
0.29425
0.2918
0.29065
0.28885
0.29115
0.2907
0.28865
0.29025
0.29355
0.2961
0.29915
0.3036
0.3033
0.3039
0.3069
0.30995
0.30975
0.3118
0.3115
0.3113
0.3087
0.30485
0.3024
0.29905
0.2981
0.29905
0.29565
0.2945
0.292
0.29155
0.29285
0.29235
0.29445
0.2966
0.29725
0.2975
0.2955
0.29845
0.2952
0.29845
0.2955
0.2942
0.28955
0.2917
0.29325
0.29275
0.2909
0.28895
0.29175
0.2941
0.29205
0.28965
0.29015
0.28305
0.28265
0.2829
0.2817
0.28075
0.28075
0.27955
0.28025
0.2811
0.27695
0.278
0.27765
0.27825
0.2805
0.28025
0.28025
0.28385
0.2836
0.28735
0.2864
0.2888
0.28885
0.2914
0.29245
0.29
0.29085
0.28955
0.2874
0.28405
0.28495
0.28445
0.286
0.2865
0.28695
0.28735
0.289
0.2909
0.28635
0.28415
0.28335
0.28465
0.28245
0.28545
0.29045
0.2942
0.2953
0.29525
0.29885
0.3009
0.29875
0.2986
0.2967
0.301
0.29525
0.2957
0.293
0.29125
0.2887
0.2905
0.2878
0.2908
0.29115
0.2928
0.29615
0.29755
0.29725
0.29515
0.29395
0.2944
0.29325
0.294
0.2973
0.29
0.29185
0.2926
0.2987
0.30075
0.3007
0.30155
0.3013
0.30165
0.3019
0.30295
0.2992
0.2995
0.3
0.29565
0.2952
0.2934
0.2894
0.28905
0.28755
0.28945
0.2896
0.2923
0.29005
0.28985
0.29315
0.2939
0.29445
0.2935
0.2891
0.2855
0.28205
0.2827
0.28295
0.27985
0.28055
0.27645
0.274
0.27715
0.28015
0.2809
0.27945
0.2798
0.2787
0.27545
0.27085
0.27105
0.2697
0.27495
0.277
0.2798
0.2776
0.2788
0.27655
0.27555
0.2773
0.27765
0.2763
0.2765
0.2815
0.2848
0.28535
0.2843
0.28915
0.2956
0.29915
0.29935
0.29645
0.29535
0.2937
0.2962
0.29575
0.2923
0.29475
0.29665
0.29665
0.2949
0.2946
0.293
0.288
0.28795
0.28975
0.2925
0.2918
0.2962
0.29715
0.2979
0.2942
0.29345
0.29045
0.28975
0.28575
0.28735
0.2817
0.27775
0.27605
0.2727
0.27435
0.27855
0.28075
0.28515
0.28825
0.2883
0.28465
0.2854
0.2897
0.2851
0.28635
0.28685
0.28625
0.28825
0.28635
0.28665
0.28455
0.28375
0.283
0.28445
0.2876
0.2877
0.28995
0.29065
0.2913
0.29245
0.29475
0.29505
0.3
0.30015
0.30035
0.29965
0.295
0.29445
0.2942
0.29155
0.29195
0.289
0.28895
0.2888
0.2881
0.2874
0.2866
0.2895
0.28645
0.2892
0.29335
0.29405
0.2967
0.2956
0.2965
0.29895
0.2985
0.2956
0.294
0.2931
0.2922
0.29265
0.29045
0.28995
0.2923
0.2945
0.29555
0.29655
0.2965
0.2946
0.29375
0.2968
0.2951
0.29625
0.29645
0.29565
0.2915
0.2932
0.2931
0.29145
0.2909
0.2871
0.28645
0.28665
0.2908
0.28915
0.2893
0.28865
0.2894
0.2869
0.286
0.29275
0.29135
0.29125
0.29115
0.2911
0.2915
0.29505
0.29655
0.2941
0.29185
0.2935
0.29125
0.28895
0.2903
0.28935
0.29145
0.29295
0.2952
0.2937
0.29465
0.29825
0.2994
0.30045
0.30045
0.29575
0.2974
0.2949
0.29345
0.28635
0.2885
0.2883
0.29085
0.2897
0.2916
0.2928
0.29345
0.29495
0.29635
0.29325
0.2916
0.2904
0.29135
0.29245
0.2967
0.2945
0.296
0.29705
0.2951
0.2945
0.2926
0.2916
0.29165
0.2894
0.2904
0.2888
0.28325
0.28535
0.2893
0.2872
0.28675
0.28515
0.2865
0.28775
0.28795
0.2879
0.28715
0.2874
0.28715
0.2869
0.28425
0.2843
0.2838
0.2825
0.28265
0.2807
0.2829
0.28435
0.2839
0.28335
0.2831
0.2797
0.28235
0.2841
0.2886
0.28925
0.2883
0.2894
0.2859
0.28565
0.28675
0.28755
0.288
0.2888
0.29155
0.29085
0.29355
0.2963
0.2934
0.293
0.2951
0.2953
0.29315
0.2877
0.2837
0.28585
0.28615
0.28645
0.2868
0.28665
0.28335
0.284
0.28375
0.28285
0.2797
0.2803
0.27975
0.2795
0.281
0.27945
0.2799
0.2821
0.2811
0.2798
0.28315
0.2835
0.28135
0.2802
0.28035
0.27965
0.2778
0.2802
0.2777
0.2779
0.2761
0.27685
0.2785
0.28235
0.2838
0.286
0.2876
0.29125
0.29495
0.29665
0.2963
0.29685
0.29435
0.29135
0.28915
0.29015
0.2882
0.2865
0.2861
0.2867
0.2839
0.2837
0.2855
0.28375
0.28255
0.28205
0.28045
0.2815
0.28165
0.2808
0.2832
0.2862
0.28945
0.2923
0.29315
0.29675
0.2991
0.2994
0.29735
0.2926
0.29075
0.29015
0.28895
0.2881
0.2834
0.28105
0.28005
0.28365
0.2856
0.2865
0.2848
0.2817
0.28525
0.28745
0.28375
0.2844
0.2863
0.2875
0.289
0.29195
0.2949
0.29655
0.29745
0.2949
0.2943
0.2883
0.28525
0.28235
0.2835
0.2849
0.28725
0.28665
0.2845
0.2858
0.28575
0.28525
0.2853
0.28605
0.2838
0.2821
0.282
0.28595
0.28025
0.2767
0.2795
0.27485
0.2718
0.2721
0.27095
0.27165
0.27435
0.27945
0.27785
0.2787
0.282
0.28245
0.28445
0.2835
0.2809
0.27885
0.27855
0.27965
0.28
0.28245
0.2849
0.28635
0.28735
0.2877
0.2864
0.2872
0.29135
0.2908
0.29255
0.2899
0.2903
0.2901
0.28705
0.2869
0.2879
0.28725
0.2893
0.2929
0.2973
0.2937
0.2925
0.2922
0.2918
0.2941
0.29425
0.2965
0.29355
0.2938
0.29285
0.29465
0.293
0.2946
0.2985
0.29735
0.2951
0.2959
0.29575
0.29415
0.2923
0.2921
0.2956
0.2922
0.29345
0.2925
0.29175
0.2932
0.29145
0.29245
0.29305
0.2898
0.28705
0.2882
0.29245
0.29315
0.2936
0.29285
0.29315
0.2941
0.29485
0.29465
0.29085
0.28865
0.2905
0.2918
0.29455
0.2945
0.29115
0.28865
0.28775
0.2838
0.28735
0.28495
0.28235
0.2818
0.28295
0.28575
0.28515
0.28135
0.28145
0.2798
0.2799
0.27995
0.28725
0.28895
0.2906
0.2903
0.29005
0.2908
0.29195
0.29545
0.2963
0.29525
0.29295
0.29425
0.2945
0.298
0.2972
0.29545
0.29475
0.29315
0.28995
0.29145
0.29555
0.2972
0.2955
0.29695
0.2968
0.29895
0.29645
0.2948
0.29525
0.2909
0.2875
0.2884
0.2881
0.29045
0.28665
0.2843
0.28125
0.2801
0.2789
0.2749
0.2766
0.2731
0.27195
0.2747
0.2752
0.27465
0.28005
0.2802
0.2783
0.278
0.27985
0.27525
0.27415
0.2677
0.26915
0.26905
0.26975
0.2721
0.2738
0.27755
0.2805
0.2795
0.28075
0.2849
0.2886
0.28465
0.28445
0.2855
0.2882
0.29165
0.28845
0.29015
0.2884
0.28505
0.2823
0.27975
0.28215
0.28415
0.2863
0.28465
0.2831
0.28445
0.28645
0.29105
0.29055
0.28745
0.28565
0.28565
0.2875
0.2841
0.28085
0.27925
0.27985
0.2815
0.28335
0.2843
0.28585
0.28825
0.2868
0.28545
0.28455
0.28725
0.2898
0.2898
0.29625
0.29615
0.29605
0.29475
0.29175
0.2951
0.2972
0.29415
0.29745
0.2975
0.2956
0.2954
0.29465
0.29485
0.29375
0.29635
0.2985
0.3002
0.2968
0.29795
0.2983
0.29715
0.2964
0.2931
0.2879
0.2862
0.2859
0.28655
0.2858
0.28345
0.2852
0.285
0.28
0.279
0.28055
0.2818
0.27985
0.2829
0.28235
0.28395
0.2843
0.28585
0.2849
0.28535
0.28545
0.28775
0.2913
0.293
0.28675
0.28825
0.29055
0.29285
0.2925
0.29315
0.2913
0.29365
0.2955
0.29515
0.29885
0.30455
0.30395
0.30275
0.3022
0.3005
0.3035
0.3035
0.30675
0.30205
0.299
0.2946
0.29055
0.2878
0.28745
0.28675
0.2834
0.282
0.28525
0.28855
0.29285
0.2953
0.29745
0.295
0.2918
0.2888
0.2845
0.28465
0.2882
0.28585
0.2824
0.28535
0.2857
0.2932
0.2945
0.29135
0.2916
0.2939
0.2895
0.2928
0.2875
0.2889
0.2931
0.2924
0.29385
0.29475
0.2912
0.2889
0.2894
0.28655
0.2833
0.28275
0.27855
0.2748
0.2735
0.27095
0.2748
0.2742
0.27555
0.27415
0.27305
0.27585
0.2789
0.2814
0.2794
0.2758
0.2765
0.27705
0.2759
0.27935
0.282
0.27955
0.2783
0.2795
0.2808
0.28155
0.28235
0.2853
0.2916
0.29235
0.29385
0.29175
0.2918
0.29245
0.2892
0.2903
0.2897
0.28865
0.2903
0.2929
0.2904
0.2901
0.2894
0.2907
0.293
0.29045
0.2865
0.2853
0.2854
0.2865
0.28495
0.28635
0.28405
0.2851
0.28555
0.2877
0.28835
0.2905
0.2914
0.28565
0.28895
0.291
0.2924
0.29115
0.28785
0.2855
0.2833
0.28205
0.2847
0.28495
0.2825
0.28245
0.2784
0.27945
0.27805
0.2779
0.27915
0.2825
0.2808
0.2813
0.28135
0.2807
0.2805
0.28065
0.27735
0.2749
0.2733
0.2747
0.27715
0.28115
0.2846
0.2855
0.28555
0.28545
0.2882
0.2868
0.28865
0.2888
0.28815
0.28985
0.29215
0.28855
0.286
0.28435
0.2859
0.2838
0.28625
0.2821
0.2823
0.2832
0.2819
0.28125
0.2841
0.2834
0.2833
0.28375
0.2867
0.28935
0.2903
0.2913
0.2923
0.2917
0.2902
0.29005
0.2876
0.28875
0.2889
0.29125
0.29205
0.29165
0.2903
0.29305
0.29035
0.2862
0.29065
0.28995
0.2931
[truncated: 7 more rows]

## Sheet: One sim - SD fil density
1.11301e-16
0.0535191
0.0701104
0.0697154
0.0726608
0.070881
0.0666231
0.0655987
0.060663
0.0631722
0.0641449
0.0636771
0.067284
0.0672447
0.0719506
0.0754268
0.0801321
0.0835584
0.0827614
0.0811259
0.083059
0.0845428
0.0865885
0.0883019
0.0889
0.0900729
0.0937226
0.0917309
0.0889723
0.0941031
0.0957089
0.0996829
0.101637
0.102442
0.0998083
0.0980819
0.0987672
0.0952816
0.0944811
0.0957945
0.091001
0.0871929
0.0943508
0.0924278
0.0943785
0.0947781
0.0972211
0.0972874
0.0924278
0.0903611
0.0918623
0.0923349
0.0915571
0.0959114
0.0971467
0.0995189
0.09571
0.0944584
0.0902935
0.0872654
0.0869587
0.0867955
0.0849087
0.0923602
0.0934949
0.0911274
0.0925585
0.0931383
0.0929324
0.0943158
0.0944399
0.0943254
0.093677
0.0881935
0.0900764
0.0924064
0.0966437
0.102326
0.0978449
0.0951108
0.0935068
0.0926804
0.091058
0.0875918
0.0866772
0.0859786
0.0876236
0.0881519
0.0911043
0.0868499
0.0870538
0.0853941
0.0899385
0.0904778
0.0890142
0.090022
0.0884437
0.0869471
0.0890316
0.0841272
0.0826231
0.0783421
0.0811399
0.0856554
0.0829493
0.0835217
0.0900162
0.0896839
0.0895332
0.0901331
0.0839693
0.0899976
0.0911016
0.0909712
0.0945842
0.0970308
0.0983818
0.0988232
0.0998036
0.0953328
0.0947092
0.09569
0.0934013
0.0915442
0.0961176
0.0982447
0.102492
0.0994257
0.103256
0.0998852
0.100419
0.099275
0.0971487
0.0991749
0.0969794
0.0967448
0.0993227
0.0977876
0.0914131
0.0951873
0.0993142
0.0973559
0.0943082
0.0852847
0.0817679
0.0846177
0.0877493
0.0903488
0.0933842
0.0919995
0.0940478
0.0951879
0.0905942
0.09021
0.0953267
0.0929479
0.0895645
0.0899131
0.0873953
0.0874737
0.0911015
0.0925233
0.0904321
0.089971
0.0953022
0.100076
0.101513
0.104326
0.102883
0.0998858
0.0964691
0.0939598
0.0950216
0.0925852
0.0932221
0.0969711
0.090426
0.0910348
0.0869358
0.0875655
0.0857626
0.090114
0.0920366
0.0896671
0.0916495
0.0951555
0.0974547
0.098458
0.0960367
0.0937858
0.0939173
0.0958799
0.0942996
0.0949149
0.0922918
0.0950789
0.0991527
0.100278
0.0986812
0.0953016
0.0964709
0.0968158
0.097998
0.0967717
0.0963218
0.0970619
0.105384
0.104156
0.105286
0.10604
0.102325
0.101069
0.103029
0.102319
0.101247
0.0991919
0.0936227
0.091427
0.0898855
0.089364
0.0926852
0.0944306
0.0895571
0.0900518
0.0878441
0.0868918
0.0896167
0.089004
0.0959789
0.0924067
0.0989543
0.100371
0.100712
0.0931093
0.0958931
0.099066
0.101169
0.0962081
0.0946126
0.0956856
0.0956526
0.097732
0.0964501
0.0947254
0.0967461
0.0971395
0.0959804
0.0936792
0.0936204
0.0945647
0.0867239
0.0839155
0.0835859
0.086121
0.0895732
0.0904508
0.0892082
0.0882852
0.0893849
0.0893204
0.100082
0.101865
0.101288
0.095763
0.0884017
0.093806
0.0923092
0.0921469
0.0928705
0.0952457
0.0930844
0.091455
0.0939676
0.0953636
0.0927648
0.0980245
0.100801
0.10614
0.101779
0.0998177
0.101565
0.0998994
0.104376
0.103615
0.104379
0.105635
0.10433
0.103624
0.101239
0.102574
0.0985469
0.0978101
0.101831
0.10226
0.100748
0.0955638
0.096232
0.0999231
0.0995944
0.105784
0.102423
0.101835
0.0995693
0.0979225
0.0972971
0.0982843
0.0913587
0.0908573
0.087115
0.0842585
0.0895313
0.0901701
0.0902045
0.0892793
0.0875264
0.0863427
0.0851587
0.0857937
0.0919987
0.0908054
0.0916658
0.0936205
0.0907475
0.0904728
0.0933933
0.0983992
0.0969818
0.0942614
0.0932428
0.0953008
0.0989743
0.103678
0.0972595
0.0971439
0.0941589
0.0973777
0.100493
0.0984091
0.0985003
0.095058
0.0955334
0.0955365
0.101249
0.0995028
0.0980297
0.0940247
0.0888486
0.0874483
0.088069
0.0851117
0.0862773
0.0853137
0.0910242
0.0897516
0.089625
0.0899623
0.0903778
0.0905898
0.0877683
0.0884196
0.0903649
0.0960228
0.0957885
0.0927945
0.0898078
0.0917999
0.0955692
0.0964807
0.0955143
0.0918217
0.0913534
0.0884484
0.0935581
0.0904505
0.0916666
0.0883677
0.0866001
0.0832493
0.0852814
0.0860891
0.0855954
0.0883534
0.0865659
0.0827758
0.0817261
0.0861834
0.0868159
0.0866235
0.0876393
0.0876719
0.0912282
0.0884001
0.0876031
0.0878577
0.0887256
0.0866099
0.0843382
0.0846808
0.0859494
0.085322
0.0826459
0.08289
0.0809308
0.0834666
0.0812404
0.0829625
0.0895694
0.0870633
0.0832584
0.0821003
0.0792881
0.0831944
0.084299
0.0911261
0.0895806
0.0888141
0.0864054
0.0851023
0.0848886
0.0839983
0.0850373
0.0867937
0.0911893
0.0933394
0.0951077
0.0899679
0.0893527
0.0940739
0.0917966
0.0897119
0.091694
0.0934615
0.0940828
0.0959619
0.0970986
0.0991784
0.100713
0.102551
0.101012
0.0967068
0.0931781
0.094134
0.0967948
0.0963124
0.0951487
0.0968862
0.0959133
0.0920932
0.0883762
0.0903318
0.0901255
0.0927682
0.0959407
0.0964131
0.092568
0.0923794
0.0878873
0.0920314
0.0940341
0.0945013
0.0920513
0.090102
0.093667
0.0898978
0.0862786
0.0860022
0.0902198
0.0903316
0.0905988
0.0905127
0.0894083
0.0904313
0.0877672
0.0864135
0.0871773
0.0836527
0.0840172
0.0882128
0.0876838
0.0951813
0.0990457
0.0993863
0.0983884
0.0972939
0.0957016
0.0957845
0.0973515
0.0953949
0.0900479
0.0936539
0.0941879
0.0936919
0.090609
0.0905111
0.0934943
0.0946447
0.0913299
0.0901728
0.0903805
0.0988492
0.102732
0.105466
0.0996955
0.0969704
0.0936925
0.0939141
0.0962842
0.0970008
0.102944
0.103749
0.103563
0.108066
0.105368
0.10214
0.0948285
0.0902938
0.088698
0.0845191
0.0841059
0.0882723
0.089927
0.0926829
0.0921806
0.0916793
0.0907106
0.0889252
0.0942599
0.0955003
0.0949218
0.0935592
0.0946745
0.0916832
0.0962254
0.0909719
0.0920004
0.0912284
0.0901144
0.0928254
0.0982562
0.0969662
0.0941276
0.0910861
0.0914206
0.0890937
0.0917408
0.0905683
0.0937933
0.0959449
0.0962617
0.0946041
0.0923735
0.0885834
0.0908234
0.0934035
0.0911913
0.0946137
0.0943147
0.0942192
0.0961373
0.0976411
0.0990319
0.099335
0.0977135
0.0965015
0.102219
0.101377
0.101293
0.0973663
0.0941301
0.0972904
0.096245
0.0960357
0.0938458
0.0953848
0.0941599
0.0934534
0.087609
0.097814
0.100158
0.0981737
0.0953109
0.0951036
0.0971814
0.102737
0.0999214
0.101971
0.102766
0.0982405
0.0979497
0.0966005
0.0989696
0.100809
0.104273
0.102468
0.104331
0.103173
0.0993954
0.0947665
0.0941759
0.0941381
0.0900101
0.0919307
0.0923855
0.0911664
0.0924207
0.090645
0.0851081
0.0868523
0.0874919
0.0875076
0.0909314
0.0881303
0.0874885
0.0879822
0.0874682
0.0919798
0.088615
0.0844964
0.0884764
0.0878321
0.0893327
0.0982733
0.0995896
0.101976
0.0981892
0.102615
0.101506
0.0959922
0.0991836
0.0961447
0.0935504
0.0961416
0.0995366
0.100287
0.0966196
0.0989261
0.0903803
0.0937596
0.101293
0.10199
0.0973446
0.0995417
0.0961113
0.0919836
0.0883785
0.0914506
0.0868442
0.082902
0.08487
0.086277
0.0890921
0.0857127
0.086373
0.0867587
0.0871963
0.0893335
0.0905216
0.0952415
0.0929848
0.0944441
0.0902412
0.0917271
0.0943004
0.0886141
0.0919575
0.0986059
0.102211
0.106995
0.105598
0.104635
0.0984348
0.0972419
0.0963225
0.0958901
0.0985199
0.101108
0.10282
0.100385
0.0962613
0.0984368
0.100537
0.100335
0.0953954
0.09271
0.0921624
0.0937981
0.0982683
0.100201
0.101177
0.0974076
0.100251
0.103318
0.0999487
0.102174
0.102962
0.10248
0.10068
0.0959527
0.0918912
0.0949421
0.0966346
0.0975066
0.0959189
0.0977002
0.0959757
0.0958429
0.0965641
0.0898501
0.0900774
0.0898127
0.0889892
0.0908939
0.0954676
0.0948389
0.0977225
0.0971671
0.099632
0.104761
0.107416
0.105684
0.0995089
0.0958195
0.0907047
0.0901475
0.0873047
0.0830997
0.0818234
0.0836686
0.0838165
0.0886041
0.0894612
0.0897006
0.0889803
0.0881873
0.0871616
0.0928889
0.0928097
0.0907618
0.0839658
0.0878111
0.085129
0.0856409
0.0898897
0.0871546
0.0903516
0.0887628
0.0840545
0.0879278
0.0908683
0.0892314
0.0864771
0.0875275
0.0875105
0.0876906
0.0888632
0.0879161
0.0895045
0.0895058
0.0878896
0.0859284
0.0870559
0.087812
0.0873216
0.0851876
0.0854236
0.0877655
0.0903839
0.0883042
0.0912729
0.0947899
0.093775
0.0931816
0.0894188
0.0879861
0.0850557
0.0826192
0.0811135
0.0788713
0.0851301
0.0863741
0.0875356
0.0877966
0.0895819
0.0902325
0.0900684
0.0863095
0.0875043
0.0902134
0.0897355
0.0910525
0.0872646
0.0855274
0.0885879
0.0912129
0.0908586
0.0957593
0.0921096
0.0917359
0.0920515
0.0928584
0.0945451
0.0885222
0.0922655
0.0927702
0.0967759
0.0966005
0.0948721
0.0955939
0.0930947
0.0925621
0.0930715
0.0918093
0.0925072
0.0907319
0.0881712
0.0901956
0.0944466
0.0925657
0.0956808
0.0989344
0.0988651
0.0998813
0.0987556
0.0980505
0.092963
0.0901614
0.0920812
0.0897424
0.0902075
0.0978395
0.0976016
0.100872
0.0982707
0.0981548
0.0947265
0.096839
0.0987453
0.0991066
0.0990019
0.104133
0.102898
0.10146
0.0942305
0.0946028
0.0929062
0.0953933
0.100887
0.102294
0.0999084
0.0971836
0.0972009
0.100425
0.0957423
0.0946604
0.0959084
0.0949911
0.0960766
0.0933732
0.096344
0.092866
0.0872332
0.0888484
0.0924689
0.097382
0.0989583
0.0960737
0.0949116
0.0943305
0.0960142
0.0998556
0.100396
0.0974349
0.0981753
0.0946545
0.0961615
0.092801
0.089092
0.0877542
0.0878998
0.0886095
0.0862724
0.0849475
0.0921377
0.0906831
0.0888445
0.0943265
0.0917814
0.0869966
0.0871467
0.0898013
0.087399
0.0886957
0.0911126
0.0873606
0.0917332
0.0954193
0.0941292
0.0910713
0.093721
0.0938303
0.0954554
0.0953122
0.0945977
0.0901305
0.0871479
0.088773
0.0930418
0.0904706
0.0873886
0.0871987
0.0907584
0.0949726
0.0929392
0.0942329
0.0934514
0.0913605
0.0932198
0.0928975
0.0913766
0.0926494
0.0943732
0.093081
0.0959317
0.0990071
0.0962578
0.0951932
0.0939113
0.0945158
0.0947275
0.0927183
0.0935712
0.0941451
0.0920179
0.0912861
0.0938854
0.0915088
0.0913492
0.0945176
0.0960214
0.0957488
0.0941599
0.0962393
0.0982427
0.0986958
0.0979596
0.104659
0.101353
0.102599
0.104237
0.106165
0.109108
0.108382
0.109027
0.109845
0.110161
0.101269
0.100985
0.101662
0.0985033
0.103295
0.0998129
0.0960838
0.0915662
0.0900856
0.0919375
0.0993987
0.0973719
0.10247
0.100735
0.0932512
0.100698
0.104895
0.108532
0.102925
0.105803
0.102454
0.105063
0.103826
0.0997115
0.0961222
0.0978929
0.0969911
0.0940849
0.100076
0.103601
0.0986285
0.0976144
0.0976901
0.0968421
0.0957116
0.0962413
0.0954344
0.099001
0.0972491
0.0987225
0.0985889
0.0975249
0.0997393
0.101483
0.0984356
0.0961948
0.0991041
0.105835
0.101877
0.102751
0.108321
0.107635
0.108331
0.110472
0.112533
0.114387
0.114322
0.111413
0.113071
0.114251
0.117098
0.109469
0.104915
0.104982
0.101317
0.0997597
0.100543
0.0945114
0.0937196
0.0941332
0.0913774
0.0899088
0.0922209
0.0930095
0.0979933
0.0999117
0.101431
0.102975
0.104726
0.108854
0.105121
0.106916
0.107812
0.107668
0.106994
0.11033
0.115931
0.112269
0.108453
0.110776
0.10993
0.105828
0.105528
0.101924
0.0983716
0.103515
0.103297
0.0993603
0.100703
0.102995
0.103709
0.100393
0.0985622
0.0945965
0.0960828
0.0995724
0.100766
0.101323
0.101713
0.102086
0.0995634
0.0945824
0.0951061
0.0948362
0.096513
0.0970541
0.100338
0.097172
0.0988542
0.0998057
0.0996198
0.0961897
0.0960291
0.0979262
0.0962624
0.0983376
0.0961674
0.0971881
0.0979818
0.0988567
0.100392
0.0937333
0.0909414
0.0935532
0.0960148
0.094531
0.0964414
0.0998676
0.0987003
0.101899
0.099456
0.100369
0.102001
0.102433
0.101117
0.0967824
0.0993182
0.0922761
0.0878226
0.091058
0.0928607
0.0925393
0.095817
0.0977421
0.0991177
0.0979102
0.0942999
0.0943808
0.0956763
0.0911141
0.0889033
0.0928763
0.0966447
0.0978297
0.0962581
0.0972298
0.0983017
0.100691
0.10546
0.101413
0.103482
0.0996428
0.0976822
0.0984962
0.0968807
0.100364
0.0941772
0.0927196
0.0882795
0.0952582
0.0946836
0.0970901
0.100091
0.0965597
0.0994592
0.0996047
0.101921
0.100075
0.0943686
0.0947498
0.0954331
0.0963766
0.102534
0.100871
0.0997337
0.0986249
0.100807
0.106114
0.10435
0.103701
0.103396
0.106151
0.0974313
0.0978811
0.0965556
0.0974641
0.101055
0.0999577
0.10319
0.100433
0.101341
0.100504
0.103824
0.10113
0.100145
0.0957316
0.0922118
0.0917473
0.0924897
0.090586
0.0880652
0.0884697
0.0928726
0.0929351
0.0943121
0.0967601
0.0961667
0.0924729
0.09197
0.0914918
0.0939475
0.0977813
0.10217
0.105779
0.105307
0.102084
0.100852
0.0990954
0.0936409
0.0937086
0.0887088
0.088198
0.0938726
0.0929903
0.0904275
0.0907344
0.0894011
0.0899732
0.0925448
0.0914703
0.0912631
0.0919184
0.0974435
0.0981024
0.095111
0.0914567
0.0900518
0.0919069
0.0923658
0.0945504
0.0933621
0.093888
0.0894725
0.0918736
0.088859
0.086447
0.0888109
0.0916092
0.0897975
0.0934755
0.097722
0.0940223
0.0954703
0.0966489
0.100238
0.0981064
0.0983163
0.0997664
0.102684
0.104984
0.0999767
0.0952837
0.0977809
0.0987074
0.0995893
0.094329
0.0886476
0.0876519
0.0860577
0.0837183
0.0840769
0.0931762
0.0968651
0.102859
0.102391
0.0958386
0.0991059
0.0985056
0.104463
0.100686
0.0978317
0.0981568
0.0967172
0.0970802
0.100537
0.0932079
0.0843884
0.0867877
0.0902091
0.0927725
0.0934016
0.0962237
0.09628
0.0952916
0.0967892
0.0935535
0.095801
0.0994204
0.10385
0.106966
0.103455
0.105751
0.103438
0.0949726
0.0972453
0.0986242
0.103238
0.10279
0.106509
0.108801
0.104696
0.106781
0.107106
0.105382
0.100621
0.100463
0.104585
0.102232
0.105707
0.101425
0.0994697
0.102802
0.0989073
0.0922507
0.0949478
0.0956774
0.0971253
0.0975915
0.0935739
0.0922009
0.0916499
0.0969471
0.0943941
0.0943563
0.0950522
0.0995055
0.0982175
0.102897
0.105225
0.10641
0.110866
0.112449
0.102725
0.105004
0.102817
0.101913
0.0982929
0.0930855
0.0895432
0.092107
0.0979199
0.0939463
0.0941426
0.0960929
0.0961972
0.0942593
0.0916351
0.0955015
0.0978548
0.10386
0.0998903
0.0998229
0.0973557
0.0941398
0.0952626
0.0943328
0.0970938
0.096833
0.102315
0.100957
0.0960575
0.0942416
0.0916866
0.0910674
0.0991621
0.094817
0.0913543
0.0949448
0.0967753
0.101314
0.0991942
0.0952987
0.0951129
0.0939421
0.0948503
0.0968716
0.10078
0.0990006
0.0996515
0.101049
0.101593
0.0968767
0.0989015
0.100955
0.102035
0.0986743
0.101141
0.0950527
0.0926585
0.0924186
0.0958596
0.0924037
0.0910961
0.0871018
0.0890372
0.0877625
0.0910588
0.0967224
0.0938607
0.0951203
0.0952692
0.0919447
0.0909632
0.0878777
0.0884342
0.089584
0.0944326
0.0959951
0.0967707
0.0974831
0.102787
0.101177
0.102684
0.0992598
0.0983603
0.0962899
0.0964414
0.0977409
0.0980645
0.0983571
0.0985191
0.0981206
0.0960192
0.0973032
0.0961928
0.0902719
0.0929926
0.0923502
0.0939848
0.0961531
0.0967099
0.0947567
0.0988787
0.102984
0.101636
0.0988811
0.0974186
0.0970235
0.097877
0.0988759
0.100871
0.0982499
0.101248
0.0971054
0.0993468
0.0983379
0.101664
0.0986436
0.0964473
0.0897048
0.086305
0.090572
0.0893959
0.0911892
0.0950946
0.0966124
0.0963624
0.0982357
0.101983
0.100478
0.0956591
0.0994503
0.0981868
0.0966876
0.0945128
0.0923354
0.0905871
0.0862542
0.0879115
0.0865646
0.0919065
0.093232
0.0910446
0.0869989
0.0884164
0.0925375
0.0892693
0.0936794
0.0947449
0.092555
0.095427
0.101993
0.102662
0.0975374
0.0929827
0.0922908
0.0976623
0.0967509
0.0937976
0.0952821
0.0983191
0.0976332
0.0975199
0.0975668
0.0957634
0.0918185
0.0917379
0.0948087
0.092957
0.0962676
0.0968747
0.0944027
0.0989734
0.0965872
0.0950377
0.0955402
0.0936008
0.0979783
0.0986888
0.0966596
0.0972163
0.0989267
0.101611
0.0973091
0.101395
0.10543
0.106153
0.105767
0.0982637
0.0979757
0.100276
0.101072
0.0987479
0.0990477
0.0934081
0.0925648
0.0904011
0.0946784
0.0925281
0.0891881
0.086698
0.0843486
0.0879409
0.0893528
0.0847843
0.0828005
0.0869316
0.091694
0.0913495
0.0957105
0.0996224
0.0977207
0.0973415
0.0958117
0.0973184
0.0911132
0.0898683
0.0935292
0.0928702
0.0966992
0.0979228
0.093461
0.0902077
0.0861129
0.087192
0.0878494
0.0904923
0.0954434
0.0972773
0.0978235
0.0984656
0.099431
0.0910488
0.0905323
0.0910395
0.0880725
0.083086
0.0857927
0.0888995
0.0849048
0.0838554
0.0879595
0.0892846
0.0902498
0.0957121
0.0951249
0.094819
0.0875504
0.0860536
0.0864439
0.0797698
0.07982
0.0809554
0.0807471
0.082748
0.0841402
0.0888253
0.0872166
0.0833413
0.0865541
0.0864526
0.0833673
0.0814751
0.0872471
0.0893691
0.0915088
0.09341
0.0913736
0.090485
0.0915579
0.0966812
0.0994285
0.102847
0.0979914
0.0992117
0.0964764
0.0970042
0.0931913
0.094414
0.0913151
0.0928818
0.0919338
0.0936549
0.0983475
0.0990254
0.103336
0.107739
0.100519
0.101813
0.0968094
0.101295
0.100067
0.104495
0.104037
0.105994
0.0988789
0.0991907
0.0984796
0.102871
0.104019
0.0972558
0.0971684
0.101898
0.100706
0.0995709
0.0989328
0.0990685
0.0992463
0.0948421
0.0935958
0.0912701
0.0932613
0.0931416
0.0926867
0.0998077
0.100189
0.0990343
0.0976599
0.0995154
0.100974
0.100096
0.0988155
0.0990175
0.100489
0.0952515
0.0943158
0.0892795
0.0846735
0.0845074
0.0873705
0.0864369
0.078942
0.0799774
0.0836477
0.0886696
0.0886271
0.0891328
0.0921894
0.0901291
0.091068
0.0921954
0.0955458
0.0964636
0.0988974
0.0930948
0.09279
0.0972734
0.0931926
0.0934528
0.105001
0.110554
0.111665
0.108969
0.105567
0.100584
0.103095
0.107874
0.104387
0.102097
0.0971669
0.0919349
0.093955
0.089633
0.0893244
0.088709
0.0865485
0.0853415
0.0898152
0.0847188
0.0915215
0.0882338
0.0853577
0.0867037
0.0898351
0.0873323
0.0853311
0.0845231
0.0819633
0.081824
0.0842282
0.0859061
0.0874593
0.0905733
0.0879753
0.0872478
0.0869355
0.0915554
0.0839295
0.0892756
0.0889283
0.0890925
0.0920542
0.0906062
0.0872793
0.0891645
0.0884001
0.0899567
0.0884242
0.096444
0.100401
0.102453
0.099924
0.0987647
0.102324
0.103869
0.106246
0.104738
0.106575
0.101017
0.0977537
0.0949727
0.0940033
0.096787
0.0993359
0.0986609
0.101044
0.0989055
0.096161
0.0975421
0.0991745
0.098119
0.0983737
0.0979979
0.102003
0.101396
0.0975333
0.092137
0.089706
0.0911649
0.091227
0.0998958
0.100679
0.0997045
0.0965976
0.0942773
0.0914528
0.0938929
0.0957695
0.100631
0.104545
0.106424
0.100249
0.0975164
0.0964909
0.0953198
0.0945287
0.0981495
0.0965447
0.0978513
0.0969056
0.0904741
0.0913046
0.0920502
0.0882321
0.0976839
0.100011
0.100119
0.0983837
0.0981116
0.0973947
0.0976617
0.0975395
0.0997335
0.0972351
0.0986929
0.100133
0.0991531
0.100804
0.100957
0.0935218
0.0956751
0.0932549
0.0864544
0.0890429
0.0867168
0.0870381
0.0874052
0.0886503
0.0860757
0.0886521
0.0874227
0.0875305
0.0894202
0.0921321
0.0915901
0.0944566
0.0979966
0.0998089
0.0959425
0.097349
0.0951339
0.0960286
0.0929027
0.0926363
0.0908769
0.096856
0.100139
0.098394
0.0997896
0.101664
0.102711
0.0998689
0.0940232
0.0923819
0.0972111
0.0948776
0.0979023
0.0973741
0.0988324
0.0927732
0.0884722
0.0867976
0.0881467
0.0908914
0.0922605
0.0906038
0.090075
0.0948122
0.0996596
0.0976812
0.100065
0.0991116
0.100495
0.0981157
0.0944104
0.0977068
0.0958944
0.0950603
0.0937292
0.0914368
0.0873882
0.0874011
0.0877396
0.0896822
0.0890285
0.0916613
0.0876709
0.0906767
0.0924961
0.0942454
0.0972971
0.0992142
0.0980343
0.100406
0.0939719
0.0908076
0.088196
0.0859332
0.0851491
0.0881863
0.0875943
0.0895043
0.0919239
0.0915176
0.0878953
0.0890393
0.0882704
0.0881255
0.0903994
0.0874213
0.0900742
0.0909196
0.0921144
0.0873586
0.0900014
0.0922407
0.0902603
0.0917451
0.0907811
0.0918175
0.0866641
0.0842809
0.0870878
0.0915259
0.0929363
0.0909189
0.0911977
0.0909248
0.0901014
0.0896248
0.0931836
0.0960187
0.096696
0.10198
0.102951
0.10272
0.10384
0.104538
0.104477
0.101124
0.0960404
0.095051
0.0953122
0.0922706
0.0909125
0.0864249
0.094283
0.0936515
0.0963192
0.0932559
0.0895668
0.0889186
0.0850285
0.0856938
0.0876939
0.0863308
0.0867564
0.0889446
0.0921949
0.0961887
0.0929594
0.0918278
0.0888615
0.0909788
0.0876213
0.0855211
0.0850002
0.089684
0.0910561
0.0938217
0.0914838
0.0919154
0.0918634
0.0888429
0.0903971
0.0902356
0.0894841
0.0894669
0.0897998
0.0936073
0.0937855
0.0959328
0.0991039
0.0996324
0.0985172
0.0920449
0.0974157
0.0967054
0.100255
0.0987345
0.0991507
0.09784
0.0951368
0.0939302
0.095242
0.0993069
0.103001
0.102929
0.100511
0.0972765
0.0937387
0.0927718
0.0948852
0.0897991
0.0953672
0.0926906
0.0900068
0.0919239
0.096883
0.0989743
0.103512
0.0977662
0.0950806
0.0917416
0.0980366
0.0993905
0.0975474
0.100613
0.0938014
0.0895276
0.0916513
0.0910657
0.0916254
0.098307
0.100435
0.104487
0.0997298
0.0979733
0.0935127
0.0939485
0.0941205
0.0940253
0.0924109
0.0926196
0.0924017
[truncated: 7 more rows]

## Sheet: One sim - Time(s) - Fil density
0
0.0498418
0.0996835
0.149525
0.199367
0.249209
0.299051
0.348892
0.398734
0.448576
0.498418
0.548259
0.598101
0.647943
0.697785
0.747627
0.797468
0.84731
0.897152
0.946994
0.996835
1.04668
1.09652
1.14636
1.1962
1.24604
1.29589
1.34573
1.39557
1.44541
1.49525
1.54509
1.59494
1.64478
1.69462
1.74446
1.7943
1.84415
1.89399
1.94383
1.99367
2.04351
2.09335
2.1432
2.19304
2.24288
2.29272
2.34256
2.39241
2.44225
2.49209
2.54193
2.59177
2.64161
2.69146
2.7413
2.79114
2.84098
2.89082
2.94066
2.99051
3.04035
3.09019
3.14003
3.18987
3.23972
3.28956
3.3394
3.38924
3.43908
3.48892
3.53877
3.58861
3.63845
3.68829
3.73813
3.78797
3.83782
3.88766
3.9375
3.98734
4.03718
4.08703
4.13687
4.18671
4.23655
4.28639
4.33623
4.38608
4.43592
4.48576
4.5356
4.58544
4.63528
4.68513
4.73497
4.78481
4.83465
4.88449
4.93434
4.98418
5.03402
5.08386
5.1337
5.18354
5.23339
5.28323
5.33307
5.38291
5.43275
5.48259
5.53244
5.58228
5.63212
5.68196
5.7318
5.78165
5.83149
5.88133
5.93117
5.98101
6.03085
6.0807
6.13054
6.18038
6.23022
6.28006
6.3299
6.37975
6.42959
6.47943
6.52927
6.57911
6.62896
6.6788
6.72864
6.77848
6.82832
6.87816
6.92801
6.97785
7.02769
7.07753
7.12737
7.17722
7.22706
7.2769
7.32674
7.37658
7.42642
7.47627
7.52611
7.57595
7.62579
7.67563
7.72547
7.77532
7.82516
7.875
7.92484
7.97468
8.02453
8.07437
8.12421
8.17405
8.22389
8.27373
8.32358
8.37342
8.42326
8.4731
8.52294
8.57278
8.62263
8.67247
8.72231
8.77215
8.82199
8.87184
8.92168
8.97152
9.02136
9.0712
9.12104
9.17089
9.22073
9.27057
9.32041
9.37025
9.42009
9.46994
9.51978
9.56962
9.61946
9.6693
9.71915
9.76899
9.81883
9.86867
9.91851
9.96835
10.0182
10.068
10.1179
10.1677
10.2176
10.2674
10.3172
10.3671
10.4169
10.4668
10.5166
10.5665
10.6163
10.6661
10.716
10.7658
10.8157
10.8655
10.9153
10.9652
11.015
11.0649
11.1147
11.1646
11.2144
11.2642
11.3141
11.3639
11.4138
11.4636
11.5134
11.5633
11.6131
11.663
11.7128
11.7627
11.8125
11.8623
11.9122
11.962
12.0119
12.0617
12.1116
12.1614
12.2112
12.2611
12.3109
12.3608
12.4106
12.4604
12.5103
12.5601
12.61
12.6598
12.7097
12.7595
12.8093
12.8592
12.909
12.9589
13.0087
13.0585
13.1084
13.1582
13.2081
13.2579
13.3078
13.3576
13.4074
13.4573
13.5071
13.557
13.6068
13.6566
13.7065
13.7563
13.8062
13.856
13.9059
13.9557
14.0055
14.0554
14.1052
14.1551
14.2049
14.2547
14.3046
14.3544
14.4043
14.4541
14.504
14.5538
14.6036
14.6535
14.7033
14.7532
14.803
14.8528
14.9027
14.9525
15.0024
15.0522
15.1021
15.1519
15.2017
15.2516
15.3014
15.3513
15.4011
15.4509
15.5008
15.5506
15.6005
15.6503
15.7002
15.75
15.7998
15.8497
15.8995
15.9494
15.9992
16.0491
16.0989
16.1487
16.1986
16.2484
16.2983
16.3481
16.3979
16.4478
16.4976
16.5475
16.5973
16.6472
16.697
16.7468
16.7967
16.8465
16.8964
16.9462
16.996
17.0459
17.0957
17.1456
17.1954
17.2453
17.2951
17.3449
17.3948
17.4446
17.4945
17.5443
17.5941
17.644
17.6938
17.7437
17.7935
17.8434
17.8932
17.943
17.9929
18.0427
18.0926
18.1424
18.1922
18.2421
18.2919
18.3418
18.3916
18.4415
18.4913
18.5411
18.591
18.6408
18.6907
18.7405
18.7903
18.8402
18.89
18.9399
18.9897
19.0396
19.0894
19.1392
19.1891
19.2389
19.2888
19.3386
19.3884
19.4383
19.4881
19.538
19.5878
19.6377
19.6875
19.7373
19.7872
19.837
19.8869
19.9367
19.9866
20.0364
20.0862
20.1361
20.1859
20.2358
20.2856
20.3354
20.3853
20.4351
20.485
20.5348
20.5847
20.6345
20.6843
20.7342
20.784
20.8339
20.8837
20.9335
20.9834
21.0332
21.0831
21.1329
21.1828
21.2326
21.2824
21.3323
21.3821
21.432
21.4818
21.5316
21.5815
21.6313
21.6812
21.731
21.7809
21.8307
21.8805
21.9304
21.9802
22.0301
22.0799
22.1297
22.1796
22.2294
22.2793
22.3291
22.379
22.4288
22.4786
22.5285
22.5783
22.6282
22.678
22.7278
22.7777
22.8275
22.8774
22.9272
22.9771
23.0269
23.0767
23.1266
23.1764
23.2263
23.2761
23.3259
23.3758
23.4256
23.4755
23.5253
23.5752
23.625
23.6748
23.7247
23.7745
23.8244
23.8742
23.9241
23.9739
24.0237
24.0736
24.1234
24.1733
24.2231
24.2729
24.3228
24.3726
24.4225
24.4723
24.5222
24.572
24.6218
24.6717
24.7215
24.7714
24.8212
24.871
24.9209
24.9707
25.0206
25.0704
25.1203
25.1701
25.2199
25.2698
25.3196
25.3695
25.4193
25.4691
25.519
25.5688
25.6187
25.6685
25.7184
25.7682
25.818
25.8679
25.9177
25.9676
26.0174
26.0672
26.1171
26.1669
26.2168
26.2666
26.3165
26.3663
26.4161
26.466
26.5158
26.5657
26.6155
26.6653
26.7152
26.765
26.8149
26.8647
26.9146
26.9644
27.0142
27.0641
27.1139
27.1638
27.2136
27.2634
27.3133
27.3631
27.413
27.4628
27.5127
27.5625
27.6123
27.6622
27.712
27.7619
27.8117
27.8616
27.9114
27.9612
28.0111
28.0609
28.1108
28.1606
28.2104
28.2603
28.3101
28.36
28.4098
28.4597
28.5095
28.5593
28.6092
28.659
28.7089
28.7587
28.8085
28.8584
28.9082
28.9581
29.0079
29.0578
29.1076
29.1574
29.2073
29.2571
29.307
29.3568
29.4066
29.4565
29.5063
29.5562
29.606
29.6559
29.7057
29.7555
29.8054
29.8552
29.9051
29.9549
30.0047
30.0546
30.1044
30.1543
30.2041
30.254
30.3038
30.3536
30.4035
30.4533
30.5032
30.553
30.6028
30.6527
30.7025
30.7524
30.8022
30.8521
30.9019
30.9517
31.0016
31.0514
31.1013
31.1511
31.2009
31.2508
31.3006
31.3505
31.4003
31.4502
31.5
31.5498
31.5997
31.6495
31.6994
31.7492
31.7991
31.8489
31.8987
31.9486
31.9984
32.0483
32.0981
32.1479
32.1978
32.2476
32.2975
32.3473
32.3972
32.447
32.4968
32.5467
32.5965
32.6464
32.6962
32.746
32.7959
32.8457
32.8956
32.9454
32.9953
33.0451
33.0949
33.1448
33.1946
33.2445
33.2943
33.3441
33.394
33.4438
33.4937
33.5435
33.5934
33.6432
33.693
33.7429
33.7927
33.8426
33.8924
33.9422
33.9921
34.0419
34.0918
34.1416
34.1915
34.2413
34.2911
34.341
34.3908
34.4407
34.4905
34.5403
34.5902
34.64
34.6899
34.7397
34.7896
34.8394
34.8892
34.9391
34.9889
35.0388
35.0886
35.1384
35.1883
35.2381
35.288
35.3378
35.3877
35.4375
35.4873
35.5372
35.587
35.6369
35.6867
35.7365
35.7864
35.8362
35.8861
35.9359
35.9858
36.0356
36.0854
36.1353
36.1851
36.235
36.2848
36.3347
36.3845
36.4343
36.4842
36.534
36.5839
36.6337
36.6835
36.7334
36.7832
36.8331
36.8829
36.9328
36.9826
37.0324
37.0823
37.1321
37.182
37.2318
37.2816
37.3315
37.3813
37.4312
37.481
37.5309
37.5807
37.6305
37.6804
37.7302
37.7801
37.8299
37.8797
37.9296
37.9794
38.0293
38.0791
38.129
38.1788
38.2286
38.2785
38.3283
38.3782
38.428
38.4778
38.5277
38.5775
38.6274
38.6772
38.7271
38.7769
38.8267
38.8766
38.9264
38.9763
39.0261
39.0759
39.1258
39.1756
39.2255
39.2753
39.3252
39.375
39.4248
39.4747
39.5245
39.5744
39.6242
39.674
39.7239
39.7737
39.8236
39.8734
39.9233
39.9731
40.0229
40.0728
40.1226
40.1725
40.2223
40.2722
40.322
40.3718
40.4217
40.4715
40.5214
40.5712
40.621
40.6709
40.7207
40.7706
40.8204
40.8703
40.9201
40.9699
41.0198
41.0696
41.1195
41.1693
41.2191
41.269
41.3188
41.3687
41.4185
41.4684
41.5182
41.568
41.6179
41.6677
41.7176
41.7674
41.8172
41.8671
41.9169
41.9668
42.0166
42.0665
42.1163
42.1661
42.216
42.2658
42.3157
42.3655
42.4153
42.4652
42.515
42.5649
42.6147
42.6646
42.7144
42.7642
42.8141
42.8639
42.9138
42.9636
43.0134
43.0633
43.1131
43.163
43.2128
43.2627
43.3125
43.3623
43.4122
43.462
43.5119
43.5617
43.6115
43.6614
43.7112
43.7611
43.8109
43.8608
43.9106
43.9604
44.0103
44.0601
44.11
44.1598
44.2097
44.2595
44.3093
44.3592
44.409
44.4589
44.5087
44.5585
44.6084
44.6582
44.7081
44.7579
44.8078
44.8576
44.9074
44.9573
45.0071
45.057
45.1068
45.1566
45.2065
45.2563
45.3062
45.356
45.4059
45.4557
45.5055
45.5554
45.6052
45.6551
45.7049
45.7547
45.8046
45.8544
45.9043
45.9541
46.004
46.0538
46.1036
46.1535
46.2033
46.2532
46.303
46.3528
46.4027
46.4525
46.5024
46.5522
46.6021
46.6519
46.7017
46.7516
46.8014
46.8513
46.9011
46.9509
47.0008
47.0506
47.1005
47.1503
47.2002
47.25
47.2998
47.3497
47.3995
47.4494
47.4992
47.549
47.5989
47.6487
47.6986
47.7484
47.7983
47.8481
47.8979
47.9478
47.9976
48.0475
48.0973
48.1472
48.197
48.2468
48.2967
48.3465
48.3964
48.4462
48.496
48.5459
48.5957
48.6456
48.6954
48.7453
48.7951
48.8449
48.8948
48.9446
48.9945
49.0443
49.0941
49.144
49.1938
49.2437
49.2935
49.3434
49.3932
49.443
49.4929
49.5427
49.5926
49.6424
49.6922
49.7421
49.7919
49.8418
49.8916
49.9415
49.9913
50.0411
50.091
50.1408
50.1907
50.2405
50.2903
50.3402
50.39
50.4399
50.4897
50.5396
50.5894
50.6392
50.6891
50.7389
50.7888
50.8386
50.8884
50.9383
50.9881
51.038
51.0878
51.1377
51.1875
51.2373
51.2872
51.337
51.3869
51.4367
51.4865
51.5364
51.5862
51.6361
51.6859
51.7358
51.7856
51.8354
51.8853
51.9351
51.985
52.0348
52.0847
52.1345
52.1843
52.2342
52.284
52.3339
52.3837
52.4335
52.4834
52.5332
52.5831
52.6329
52.6828
52.7326
52.7824
52.8323
52.8821
52.932
52.9818
53.0316
53.0815
53.1313
53.1812
53.231
53.2809
53.3307
53.3805
53.4304
53.4802
53.5301
53.5799
53.6297
53.6796
53.7294
53.7793
53.8291
53.879
53.9288
53.9786
54.0285
54.0783
54.1282
54.178
54.2278
54.2777
54.3275
54.3774
54.4272
54.4771
54.5269
54.5767
54.6266
54.6764
54.7263
54.7761
54.8259
54.8758
54.9256
54.9755
55.0253
55.0752
55.125
55.1748
55.2247
55.2745
55.3244
55.3742
55.424
55.4739
55.5237
55.5736
55.6234
55.6733
55.7231
55.7729
55.8228
55.8726
55.9225
55.9723
56.0222
56.072
56.1218
56.1717
56.2215
56.2714
56.3212
56.371
56.4209
56.4707
56.5206
56.5704
56.6203
56.6701
56.7199
56.7698
56.8196
56.8695
56.9193
56.9691
57.019
57.0688
57.1187
57.1685
57.2184
57.2682
57.318
57.3679
57.4177
57.4676
57.5174
57.5672
57.6171
57.6669
57.7168
57.7666
57.8165
57.8663
57.9161
57.966
58.0158
58.0657
58.1155
58.1653
58.2152
58.265
58.3149
58.3647
58.4146
58.4644
58.5142
58.5641
58.6139
58.6638
58.7136
58.7634
58.8133
58.8631
58.913
58.9628
59.0127
59.0625
59.1123
59.1622
59.212
59.2619
59.3117
59.3615
59.4114
59.4612
59.5111
59.5609
59.6108
59.6606
59.7104
59.7603
59.8101
59.86
59.9098
59.9597
60.0095
60.0593
60.1092
60.159
60.2089
60.2587
60.3085
60.3584
60.4082
60.4581
60.5079
60.5578
60.6076
60.6574
60.7073
60.7571
60.807
60.8568
60.9066
60.9565
61.0063
61.0562
61.106
61.1559
61.2057
61.2555
61.3054
61.3552
61.4051
61.4549
61.5047
61.5546
61.6044
61.6543
61.7041
61.754
61.8038
61.8536
61.9035
61.9533
62.0032
62.053
62.1028
62.1527
62.2025
62.2524
62.3022
62.3521
62.4019
62.4517
62.5016
62.5514
62.6013
62.6511
62.7009
62.7508
62.8006
62.8505
62.9003
62.9502
63
63.0498
63.0997
63.1495
63.1994
63.2492
63.299
63.3489
63.3987
63.4486
63.4984
63.5483
63.5981
63.6479
63.6978
63.7476
63.7975
63.8473
63.8972
63.947
63.9968
64.0467
64.0965
64.1464
64.1962
64.246
64.2959
64.3457
64.3956
64.4454
64.4953
64.5451
64.5949
64.6448
64.6946
64.7445
64.7943
64.8441
64.894
64.9438
64.9937
65.0435
65.0934
65.1432
65.193
65.2429
65.2927
65.3426
65.3924
65.4422
65.4921
65.5419
65.5918
65.6416
65.6915
65.7413
65.7911
65.841
65.8908
65.9407
65.9905
66.0403
66.0902
66.14
66.1899
66.2397
66.2896
66.3394
66.3892
66.4391
66.4889
66.5388
66.5886
66.6384
66.6883
66.7381
66.788
66.8378
66.8877
66.9375
66.9873
67.0372
67.087
67.1369
67.1867
67.2365
67.2864
67.3362
67.3861
67.4359
67.4858
67.5356
67.5854
67.6353
67.6851
67.735
67.7848
67.8347
67.8845
67.9343
67.9842
68.034
68.0839
68.1337
68.1835
68.2334
68.2832
68.3331
68.3829
68.4328
68.4826
68.5324
68.5823
68.6321
68.682
68.7318
68.7816
68.8315
68.8813
68.9312
68.981
69.0309
69.0807
69.1305
69.1804
69.2302
69.2801
69.3299
69.3797
69.4296
69.4794
69.5293
69.5791
69.629
69.6788
69.7286
69.7785
69.8283
69.8782
69.928
69.9778
70.0277
70.0775
70.1274
70.1772
70.2271
70.2769
70.3267
70.3766
70.4264
70.4763
70.5261
70.5759
70.6258
70.6756
70.7255
70.7753
70.8252
70.875
70.9248
70.9747
71.0245
71.0744
71.1242
71.174
71.2239
71.2737
71.3236
71.3734
71.4233
71.4731
71.5229
71.5728
71.6226
71.6725
71.7223
71.7722
71.822
71.8718
71.9217
71.9715
72.0214
72.0712
72.121
72.1709
72.2207
72.2706
72.3204
72.3703
72.4201
72.4699
72.5198
72.5696
72.6195
72.6693
72.7191
72.769
72.8188
72.8687
72.9185
72.9684
73.0182
73.068
73.1179
73.1677
73.2176
73.2674
73.3172
73.3671
73.4169
73.4668
73.5166
73.5665
73.6163
73.6661
73.716
73.7658
73.8157
73.8655
73.9153
73.9652
74.015
74.0649
74.1147
74.1646
74.2144
74.2642
74.3141
74.3639
74.4138
74.4636
74.5134
74.5633
74.6131
74.663
74.7128
74.7627
74.8125
74.8623
74.9122
74.962
75.0119
75.0617
75.1115
75.1614
75.2112
75.2611
75.3109
75.3608
75.4106
75.4604
75.5103
75.5601
75.61
75.6598
75.7097
75.7595
75.8093
75.8592
75.909
75.9589
76.0087
76.0585
76.1084
76.1582
76.2081
76.2579
76.3078
76.3576
76.4074
76.4573
76.5071
76.557
76.6068
76.6566
76.7065
76.7563
76.8062
76.856
76.9059
76.9557
77.0055
77.0554
77.1052
77.1551
77.2049
77.2547
77.3046
77.3544
77.4043
77.4541
77.504
77.5538
77.6036
77.6535
77.7033
77.7532
77.803
77.8528
77.9027
77.9525
78.0024
78.0522
78.1021
78.1519
78.2017
78.2516
78.3014
78.3513
78.4011
78.4509
78.5008
78.5506
78.6005
78.6503
78.7002
78.75
78.7998
78.8497
78.8995
78.9494
78.9992
79.049
79.0989
79.1487
79.1986
79.2484
79.2983
79.3481
79.3979
79.4478
79.4976
79.5475
79.5973
79.6472
79.697
79.7468
79.7967
79.8465
79.8964
79.9462
79.996
80.0459
80.0957
80.1456
80.1954
80.2453
80.2951
80.3449
80.3948
80.4446
80.4945
80.5443
80.5941
80.644
80.6938
80.7437
80.7935
80.8434
80.8932
80.943
80.9929
81.0427
81.0926
81.1424
81.1922
81.2421
81.2919
81.3418
81.3916
81.4415
81.4913
81.5411
81.591
81.6408
81.6907
81.7405
81.7903
81.8402
81.89
81.9399
81.9897
82.0396
82.0894
82.1392
82.1891
82.2389
82.2888
82.3386
82.3884
82.4383
82.4881
82.538
82.5878
82.6377
82.6875
82.7373
82.7872
82.837
82.8869
82.9367
82.9865
83.0364
83.0862
83.1361
83.1859
83.2358
83.2856
83.3354
83.3853
83.4351
83.485
83.5348
83.5847
83.6345
83.6843
83.7342
83.784
83.8339
83.8837
83.9335
83.9834
84.0332
84.0831
84.1329
84.1828
84.2326
84.2824
84.3323
84.3821
84.432
84.4818
84.5316
84.5815
84.6313
84.6812
84.731
84.7809
84.8307
84.8805
84.9304
84.9802
85.0301
85.0799
85.1297
85.1796
85.2294
85.2793
85.3291
85.379
85.4288
85.4786
85.5285
85.5783
85.6282
85.678
85.7278
85.7777
85.8275
85.8774
85.9272
85.9771
86.0269
86.0767
86.1266
86.1764
86.2263
86.2761
86.3259
86.3758
86.4256
86.4755
86.5253
86.5752
86.625
86.6748
86.7247
86.7745
86.8244
86.8742
86.924
86.9739
87.0237
87.0736
87.1234
87.1733
87.2231
87.2729
87.3228
87.3726
87.4225
87.4723
87.5222
87.572
87.6218
87.6717
87.7215
87.7714
87.8212
87.871
87.9209
87.9707
88.0206
88.0704
88.1203
88.1701
88.2199
88.2698
88.3196
88.3695
88.4193
88.4691
88.519
88.5688
88.6187
88.6685
88.7184
88.7682
88.818
88.8679
88.9177
88.9676
89.0174
89.0672
89.1171
89.1669
89.2168
89.2666
89.3165
89.3663
89.4161
89.466
89.5158
89.5657
89.6155
89.6653
89.7152
89.765
89.8149
89.8647
89.9146
89.9644
90.0142
90.0641
90.1139
90.1638
90.2136
90.2634
90.3133
90.3631
90.413
90.4628
90.5127
90.5625
90.6123
90.6622
90.712
90.7619
90.8117
90.8615
90.9114
90.9612
91.0111
91.0609
91.1108
91.1606
91.2104
91.2603
91.3101
91.36
91.4098
91.4597
91.5095
91.5593
91.6092
91.659
91.7089
91.7587
91.8085
91.8584
91.9082
91.9581
92.0079
92.0578
92.1076
92.1574
92.2073
92.2571
92.307
92.3568
92.4066
92.4565
92.5063
92.5562
92.606
92.6559
92.7057
92.7555
92.8054
92.8552
92.9051
92.9549
93.0047
93.0546
93.1044
93.1543
93.2041
93.254
93.3038
93.3536
93.4035
93.4533
93.5032
93.553
93.6028
93.6527
93.7025
93.7524
93.8022
93.8521
93.9019
93.9517
94.0016
94.0514
94.1013
94.1511
94.2009
94.2508
94.3006
94.3505
94.4003
94.4502
94.5
94.5498
94.5997
94.6495
94.6994
94.7492
94.799
94.8489
94.8987
94.9486
94.9984
95.0483
95.0981
95.1479
95.1978
95.2476
95.2975
95.3473
95.3972
95.447
95.4968
95.5467
95.5965
95.6464
95.6962
95.746
95.7959
95.8457
95.8956
95.9454
95.9953
96.0451
96.0949
96.1448
96.1946
96.2445
96.2943
96.3441
96.394
96.4438
96.4937
96.5435
96.5934
96.6432
96.693
96.7429
96.7927
96.8426
96.8924
96.9422
96.9921
97.0419
97.0918
97.1416
97.1915
97.2413
97.2911
97.341
97.3908
97.4407
97.4905
97.5403
97.5902
97.64
97.6899
97.7397
97.7896
97.8394
97.8892
97.9391
97.9889
98.0388
98.0886
98.1384
98.1883
98.2381
98.288
98.3378
98.3877
98.4375
98.4873
98.5372
98.587
98.6369
98.6867
98.7365
98.7864
98.8362
98.8861
98.9359
98.9858
99.0356
99.0854
99.1353
99.1851
99.235
99.2848
99.3347
99.3845
99.4343
99.4842
99.534
99.5839
99.6337
[truncated: 7 more rows]

## Sheet: One sim - Mean fil length
2.7
44.9389
87.2414
122.201
143.329
142.151
134.915
133.67
131.612
134.938
136.783
141.595
140.651
139.682
141.821
145.863
146.664
148.813
145.183
142.557
143.993
141.358
142.783
144.788
144.796
144.059
143.219
143.831
145.495
149.251
149.301
149.129
143.914
139.885
136.391
136.867
138.915
144.021
144.661
145.017
145.919
145.248
143.054
140.2
139.505
141.212
140.577
139.057
138.364
140.349
138.31
137.839
141.157
142.287
141.166
146.757
145.807
144.686
144.314
142.329
139.299
137.383
137.077
139.259
140.725
140.937
140.187
141.592
142.834
139.77
139.464
141.431
143.866
146.836
144.477
141.45
141.407
143.643
142.058
142.115
144.02
145.409
145.001
145.125
146.335
142.717
143.178
143.875
142.311
143.201
142.109
142.856
144.444
145.61
144.691
141.184
143.638
141.719
140.171
139.26
140.388
142.58
143.787
141.549
140.858
137.15
137.074
139.762
143.002
144.531
142.693
143.968
145.242
146.38
143.881
141.729
142.915
145.572
145.793
145.148
144.894
141.242
147.35
145.292
144.968
144.323
141.836
143.496
146.192
144.571
143.203
140.258
137.177
138.735
142.274
141.64
138.752
138.084
140.986
143.149
144.291
141.127
141.147
138.994
138.381
141.527
141.46
142.099
141.732
142.044
139.07
141.948
141.324
141.399
140.361
139.06
138.845
137.706
135.918
139.717
144.675
145.623
145.717
143.863
145.605
143.259
139.808
141.137
141.556
141.593
143.006
142.706
143.114
141.773
144.351
146.043
144.925
145.126
144.217
143.403
140.636
141.884
141.256
141.562
142.699
142.824
142.7
141.245
143.815
142.672
142.751
143.603
142.736
141.274
140.928
138.435
140.314
140.136
143.64
147.027
147.314
147.427
143.728
145.186
141.046
144.064
142.188
141.522
140.275
138.871
142.67
140.478
139.935
141.345
142.431
143.384
146.682
145.858
143.901
144.94
142.671
140.939
143.746
143.682
141.322
139.966
142.173
140.46
138.312
138.633
138.365
141.532
143.532
146.296
144.432
143.345
140.023
146.061
143.935
142.292
139.805
141.975
143.57
142.197
142.695
144.07
147.974
145.647
144.037
142.664
144.531
142.583
141.661
140.703
141.68
143.099
145.526
142.89
146.498
146.054
145.09
143.501
141.672
138.131
142.207
143.307
144.403
144.42
142.036
135.97
136.983
137.535
139.513
141.59
142.946
143.8
142.461
139.019
139.52
140.988
138.884
138.74
140.031
140.563
143.562
146.763
142.313
139.616
143.179
142.146
141.012
141.238
141.894
143.787
143.309
141.084
139.389
138.801
139.121
138.328
137.451
139.866
143.926
143.829
139.379
139.249
138.681
142.068
140.318
141.631
142.953
143.279
141.765
142.093
141.686
142.716
145.441
144.427
143.145
143.743
143.641
145.737
146.457
146.397
146.744
146.48
146.411
146.2
144.908
142.614
141.96
143.29
145.804
150.329
149.518
144.204
143.125
147.026
149.394
146.788
144.623
141.516
141.94
142.109
143.631
145.111
145.081
144.384
144.91
143.945
143.67
144.691
145.231
146.799
145.29
143.046
140.424
139.357
143.322
146.597
147.481
148.255
147.321
142.149
139.15
137.893
140.406
143.344
143.066
145.176
143.566
141.104
142.22
140.684
143.536
144.248
147.226
145.393
144.74
143.093
140.591
139.953
145.632
146.137
148.61
147.249
146.022
142.987
142.691
144.698
146.92
146.478
145.034
144.061
145.69
144.899
143.896
140.804
142.569
142.113
139.754
141.047
140.255
140.469
140.98
141.799
141.666
142.06
145.182
143.905
139.913
139.01
141.45
143.224
145.968
146.712
142.679
139.149
138.647
141.698
141.669
142.86
139.505
138.851
140.236
141.753
143.611
145.248
145.174
145.539
143.965
146.02
146.931
143.541
145.506
145.31
144.161
145.665
144.505
141.905
141.616
141.071
140.578
140.793
136.86
138.565
141.592
144.196
142.1
144.772
143.519
141.222
140.214
141.871
143.362
147.732
148.585
145.097
142.648
143.962
144.334
142.89
144.507
145.351
143.636
142.81
141.964
142.102
144.545
143.152
142.669
146.056
145.475
143.415
143.104
142.686
140.674
142.823
141.196
142.019
142.478
141.074
142.69
142.082
141.8
142.051
142.849
142.135
140.444
141.962
140.579
141.156
144.313
143.741
143.041
145.061
145.073
145.091
145.693
143.35
142.687
141.637
143.543
145.278
140.926
142.869
142.938
142.849
146.993
147.258
145.388
143.385
145.182
147.141
145.324
144.646
143.24
143.817
140.539
140.656
141.564
142.854
140.667
140.418
140.554
143.202
144.195
144.721
146.89
146.805
143.926
143.517
144.554
143.452
142.144
142.764
142.888
141.76
141.11
141.425
140.094
142.664
142.966
145.002
146.232
145.977
146.579
146.267
142.482
139.752
142.397
144.724
144.345
145.686
144.165
145.562
143.338
144.781
140.774
139.311
142.688
145.651
145.511
143.461
142.988
144.226
144.431
147.958
150.74
146.637
141.954
139.703
138.498
141.732
142.229
140.789
140.544
138.1
139.277
142.419
143.031
139.895
140.168
143.325
144.922
144.279
141.952
141.466
143.857
142.586
143.346
142.528
143.406
145.101
144.659
145.62
144.254
145.218
141.553
143.142
145.722
146.149
144.645
144.68
146.836
144.094
145.923
144.25
143.033
145.041
144.018
146.476
145.599
144.539
145.918
146.159
147.616
145.997
147.713
148.187
148.999
146.663
144.342
142.51
146.611
145.563
143.573
144.336
141.434
143.838
142.234
142.835
145.674
143.49
144.109
142.578
141.458
141.801
145.026
143.086
141.318
141.661
139.278
138.959
138.093
140.192
138.25
143.405
141.857
141.827
142.825
144.559
146.978
146.556
145.848
145.322
144.741
144.583
144.887
144.903
142.068
140.518
141.147
141.057
139.89
140.141
140.687
141.704
146.484
149.312
149.468
144.253
141.676
145.448
146.998
145.11
141.303
143.051
143.244
143.024
143.471
145.11
144.439
143.976
143.328
139.341
140.792
142.131
142.894
142.96
140.105
142.061
140.84
139.182
140.4
145.681
142.831
140.844
141.669
144.01
144.718
141.112
140.416
138.837
140.166
141.298
143.471
145.003
143.255
143.979
145.321
144.977
144.128
143.63
144.35
142.042
140.176
139.956
139.948
141.808
143.447
144.111
143.977
143.637
143.887
142.229
144.133
144.161
143.065
142.297
144.18
143.498
140.051
140.217
141.314

## Sheet: One sim - SD fil length
2.22061e-15
18.2766
36.1496
57.6101
84.1227
108.094
120.499
127.312
129.116
131.322
133.237
137.128
140.101
138.866
140.291
140.878
144.553
147.28
149.383
149.633
149.317
146.303
144.334
144.499
146.819
146.348
147.089
146.575
145.132
146.54
149.462
150.333
148.864
146.248
142.426
139.491
140.148
142.012
144.49
144.692
144.963
148.28
146.359
145.049
144.137
144.238
143.646
142.247
140.312
140.924
140.984
138.568
137.941
135.834
136.482
137.916
141.177
144.575
146.861
145.722
145.863
145.002
138.342
138.697
139.345
141.047
138.688
140.143
140.874
138.54
139.179
141.408
142.711
146.529
143.937
141.106
141.49
144.278
141.311
140.974
141.489
143.883
143.957
145.353
146.746
144.649
147.326
145.882
145.292
145.351
143.805
142.236
143.419
144.082
144.58
143.341
145.814
144.558
144.249
141.842
141.891
142.408
143.16
141.77
142.141
139.568
138.659
138.978
141.428
142.663
143.841
144.852
147.456
147.137
146.894
144.757
146.428
148.598
147.937
149.213
148.115
146.143
145.274
146.807
147.631
149.006
146.854
145.023
144.114
143.917
144.279
142.756
141.09
139.074
139.188
137.945
139.107
137.325
136.663
139.776
141.734
142.27
143.319
140.949
140.366
142.117
141.584
140.676
141.117
143.405
141.898
143.232
144.317
143.476
142.087
142.911
143.463
142.089
141.756
144.422
146.02
142.832
143.265
142.759
145.799
146.159
141.151
141.099
143.975
146.925
146.038
146.066
146.99
143.801
144.155
144.909
145.675
146.347
144.492
145.259
143.318
143.862
145.782
146.923
145.759
145.821
144.989
143.054
142.985
145.083
145.85
144.352
146.86
147.135
145.781
144.107
141.838
140.191
142.041
145.19
147.306
150.237
147.543
149.849
145.94
146.23
144.027
144.295
143.623
144.205
145.613
144.075
141.845
140.681
142.295
146.058
149.17
150.465
147.306
146.376
143.474
142.208
142.902
145.073
145.839
144.446
146.345
145.666
144.167
141.495
140.827
140.774
141.411
143.224
145.239
147.139
144.764
144.875
141.87
143.793
140.633
143.274
143.585
143.086
142.907
144.055
148.369
148.992
148.865
148.055
147.519
147.025
143.865
144.208
144.171
143.185
144.605
143.562
144.447
144.073
147.917
148.306
147.373
141.321
139.976
141.729
142.247
144.512
143.228
143.061
138.081
137.202
137.44
140.818
144.095
145.08
145.452
143.048
143.196
144.215
141.221
141.112
140.359
141.236
142.54
144.57
143.696
143.325
146.623
145.43
142.396
142.665
142.072
143.487
144.271
142.402
142.299
142.501
141.534
141.417
139.982
139.838
141.008
143.282
142.995
140.542
138.907
141.634
142.147
142.652
141.77
144.447
145.803
148.394
144.819
142.8
145.906
146.515
145.263
145.201
143.888
146.532
146.138
145.808
147.398
149.611
151.43
152.178
151.677
147.917
147.844
146.302
146.883
151.17
153.784
148.843
144.461
146.019
149.184
151.611
149.964
148.294
147.705
146.129
147.851
148.643
147.891
144.173
144.811
145.234
145.562
147.108
146.958
148.801
148.158
147.446
145.179
143.774
143.849
143.706
148.248
150.458
150.347
146.995
143.834
143.21
144.427
147.313
146.37
148.284
146.603
146.002
143.446
142.258
142.045
141.195
142.819
143.798
144.856
145.694
143.815
142.874
144.21
145.878
147
147.68
149.506
149.464
149.327
149.193
147.717
148.027
145.978
147.805
146.569
142.336
142.951
139.373
142.48
143.735
142.224
142.177
142.736
140.586
140.154
142.097
141.496
143.881
143.335
143.451
144.211
142.79
141.666
143.489
144.413
146.607
144.952
142.452
140.873
144.186
143.945
144.974
144.995
141.486
142.037
140.152
140.633
142.885
144.145
145.376
144.77
147.39
149.896
145.147
146.414
148.572
148.331
147.479
145.773
143.357
144.195
142.692
143.908
144.509
141.967
139.359
139.809
144.161
145.449
144.987
143.837
144.52
143.072
142.477
143.989
144.873
146.547
149.62
146.84
147.185
147.967
145.747
145.347
146.461
148.85
149.695
150.308
150.025
149.234
148.282
146.825
148.298
147.042
149.489
146.505
146.27
145.58
144.294
145.028
145.895
140.892
144.095
144.857
144.332
143.148
143.577
144.964
145.152
147.753
146.837
147.274
145.041
146.196
147.04
147.526
149.744
149.109
146.823
145.977
146.378
147.558
146.343
144.283
145.924
143.105
143.031
143.626
141.862
146.778
146.157
146.547
149.307
149.698
149.722
149.556
149.396
149.573
149.02
147.069
145.497
144.15
145.334
146.119
144.29
144.146
142.104
143.201
145
147.58
150.172
145.81
145.172
145.673
145.473
145.121
143.553
144.346
146.118
147.37
146.534
141.509
142.281
142.475
143.029
143.564
145.793
147.478
148.277
147.513
146.706
148.114
146.47
146.357
146.035
144.826
146.53
147.348
148.399
146.333
143.99
143.717
144.553
146.416
142.524
142.739
145.059
144.363
147.334
149.015
151.088
147.13
146.027
142.782
144.621
145.127
145.302
143.649
144.56
140.166
141.993
142.645
143.085
141.507
144.653
147.9
146.577
145.112
143.154
145.408
146.378
145.063
145.129
144.135
145.358
146.772
147.844
148.36
147.687
146.192
146.035
148.713
147.743
149.513
148.494
150.011
148.754
149.899
147.728
146.306
147.066
148.246
147.969
150.877
147.886
147.492
144.279
145.799
145.885
146.619
147.989
150.933
150.745
150.862
148.299
150.501
151.603
150.718
150.753
149.452
146.451
145.128
141.867
143.778
143.999
142.884
145.194
141.009
140.612
142.58
144.597
142.217
140.043
140.465
140.184
137.946
138.874
138.798
141.689
142.536
145.523
144.615
145.896
145.145
145.023
148.496
147.172
146.681
144.909
144.997
146.333
146.306
143.809
142.619
143.75
143.831
143.778
143.007
144.385
145.859
147.98
146.34
146.649
146.347
146.767
146.439
144.937
145.309
143.991
144.297
144.808
146.331
146.581
144.957
141.769
140.165
140.325
142.348
145.06
145.846
147.214
144.453
147.736
143.734
142.856
143.998
147.11
145.067
145.663
146.043
146.436
146.396
144.479
143.634
142.606
140.925
142.843
141.65
143.69
143.351
144.881
148.923
147.74
146.58
143.873
145.262
145.909
144.245
140.695
138.571
138.222
141.771
143.852
144.174
145.184
145.445
145.323
148.891
149.248
147.417
148.109
147.621
147.194
145.833
145.391
146.057

## Sheet: One sim - Time(s) - Fil length
8.65309e-05
0.1362
0.272313
0.408426
0.544539
0.680652
0.816765
0.952878
1.08899
1.2251
1.36122
1.49733
1.63344
1.76956
1.90567
2.04178
2.1779
2.31401
2.45012
2.58623
2.72235
2.85846
2.99457
3.13069
3.2668
3.40291
3.53903
3.67514
3.81125
3.94736
4.08348
4.21959
4.3557
4.49182
4.62793
4.76404
4.90016
5.03627
5.17238
5.30849
5.44461
5.58072
5.71683
5.85295
5.98906
6.12517
6.26129
6.3974
6.53351
6.66963
6.80574
6.94185
7.07796
7.21408
7.35019
7.4863
7.62242
7.75853
7.89464
8.03076
8.16687
8.30298
8.43909
8.57521
8.71132
8.84743
8.98355
9.11966
9.25577
9.39189
9.528
9.66411
9.80022
9.93634
10.0725
10.2086
10.3447
10.4808
10.6169
10.753
10.8891
11.0252
11.1614
11.2975
11.4336
11.5697
11.7058
11.8419
11.978
12.1141
12.2503
12.3864
12.5225
12.6586
12.7947
12.9308
13.0669
13.2031
13.3392
13.4753
13.6114
13.7475
13.8836
14.0197
14.1558
14.292
14.4281
14.5642
14.7003
14.8364
14.9725
15.1086
15.2447
15.3809
15.517
15.6531
15.7892
15.9253
16.0614
16.1975
16.3337
16.4698
16.6059
16.742
16.8781
17.0142
17.1503
17.2864
17.4226
17.5587
17.6948
17.8309
17.967
18.1031
18.2392
18.3753
18.5115
18.6476
18.7837
18.9198
19.0559
19.192
19.3281
19.4643
19.6004
19.7365
19.8726
20.0087
20.1448
20.2809
20.417
20.5532
20.6893
20.8254
20.9615
21.0976
21.2337
21.3698
21.5059
21.6421
21.7782
21.9143
22.0504
22.1865
22.3226
22.4587
22.5948
22.731
22.8671
23.0032
23.1393
23.2754
23.4115
23.5476
23.6838
23.8199
23.956
24.0921
24.2282
24.3643
24.5004
24.6365
24.7727
24.9088
25.0449
25.181
25.3171
25.4532
25.5893
25.7254
25.8616
25.9977
26.1338
26.2699
26.406
26.5421
26.6782
26.8144
26.9505
27.0866
27.2227
27.3588
27.4949
27.631
27.7671
27.9033
28.0394
28.1755
28.3116
28.4477
28.5838
28.7199
28.856
28.9922
29.1283
29.2644
29.4005
29.5366
29.6727
29.8088
29.945
30.0811
30.2172
30.3533
30.4894
30.6255
30.7616
30.8977
31.0339
31.17
31.3061
31.4422
31.5783
31.7144
31.8505
31.9866
32.1228
32.2589
32.395
32.5311
32.6672
32.8033
32.9394
33.0756
33.2117
33.3478
33.4839
33.62
33.7561
33.8922
34.0283
34.1645
34.3006
34.4367
34.5728
34.7089
34.845
34.9811
35.1172
35.2534
35.3895
35.5256
35.6617
35.7978
35.9339
36.07
36.2062
36.3423
36.4784
36.6145
36.7506
36.8867
37.0228
37.1589
37.2951
37.4312
37.5673
37.7034
37.8395
37.9756
38.1117
38.2478
38.384
38.5201
38.6562
38.7923
38.9284
39.0645
39.2006
39.3368
39.4729
39.609
39.7451
39.8812
40.0173
40.1534
40.2895
40.4257
40.5618
40.6979
40.834
40.9701
41.1062
41.2423
41.3784
41.5146
41.6507
41.7868
41.9229
42.059
42.1951
42.3312
42.4674
42.6035
42.7396
42.8757
43.0118
43.1479
43.284
43.4201
43.5563
43.6924
43.8285
43.9646
44.1007
44.2368
44.3729
44.509
44.6452
44.7813
44.9174
45.0535
45.1896
45.3257
45.4618
45.598
45.7341
45.8702
46.0063
46.1424
46.2785
46.4146
46.5507
46.6869
46.823
46.9591
47.0952
47.2313
47.3674
47.5035
47.6396
47.7758
47.9119
48.048
48.1841
48.3202
48.4563
48.5924
48.7286
48.8647
49.0008
49.1369
49.273
49.4091
49.5452
49.6813
49.8175
49.9536
50.0897
50.2258
50.3619
50.498
50.6341
50.7702
50.9064
51.0425
51.1786
51.3147
51.4508
51.5869
51.723
51.8592
51.9953
52.1314
52.2675
52.4036
52.5397
52.6758
52.8119
52.9481
53.0842
53.2203
53.3564
53.4925
53.6286
53.7647
53.9008
54.037
54.1731
54.3092
54.4453
54.5814
54.7175
54.8536
54.9898
55.1259
55.262
55.3981
55.5342
55.6703
55.8064
55.9425
56.0787
56.2148
56.3509
56.487
56.6231
56.7592
56.8953
57.0314
57.1676
57.3037
57.4398
57.5759
57.712
57.8481
57.9842
58.1204
58.2565
58.3926
58.5287
58.6648
58.8009
58.937
59.0731
59.2093
59.3454
59.4815
59.6176
59.7537
59.8898
60.0259
60.162
60.2982
60.4343
60.5704
60.7065
60.8426
60.9787
61.1148
61.251
61.3871
61.5232
61.6593
61.7954
61.9315
62.0676
62.2037
62.3399
62.476
62.6121
62.7482
62.8843
63.0204
63.1565
63.2926
63.4288
63.5649
63.701
63.8371
63.9732
64.1093
64.2454
64.3816
64.5177
64.6538
64.7899
64.926
65.0621
65.1982
65.3343
65.4705
65.6066
65.7427
65.8788
66.0149
66.151
66.2871
66.4232
66.5594
66.6955
66.8316
66.9677
67.1038
67.2399
67.376
67.5122
67.6483
67.7844
67.9205
68.0566
68.1927
68.3288
68.4649
68.6011
68.7372
68.8733
69.0094
69.1455
69.2816
69.4177
69.5538
69.69
69.8261
69.9622
70.0983
70.2344
70.3705
70.5066
70.6427
70.7789
70.915
71.0511
71.1872
71.3233
71.4594
71.5955
71.7317
71.8678
72.0039
72.14
72.2761
72.4122
72.5483
72.6844
72.8206
72.9567
73.0928
73.2289
73.365
73.5011
73.6372
73.7733
73.9095
74.0456
74.1817
74.3178
74.4539
74.59
74.7261
74.8623
74.9984
75.1345
75.2706
75.4067
75.5428
75.6789
75.815
75.9512
76.0873
76.2234
76.3595
76.4956
76.6317
76.7678
76.9039
77.0401
77.1762
77.3123
77.4484
77.5845
77.7206
77.8567
77.9929
78.129
78.2651
78.4012
78.5373
78.6734
78.8095
78.9456
79.0818
79.2179
79.354
79.4901
79.6262
79.7623
79.8984
80.0345
80.1707
80.3068
80.4429
80.579
80.7151
80.8512
80.9873
81.1235
81.2596
81.3957
81.5318
81.6679
81.804
81.9401
82.0762
82.2124
82.3485
82.4846
82.6207
82.7568
82.8929
83.029
83.1651
83.3013
83.4374
83.5735
83.7096
83.8457
83.9818
84.1179
84.2541
84.3902
84.5263
84.6624
84.7985
84.9346
85.0707
85.2068
85.343
85.4791
85.6152
85.7513
85.8874
86.0235
86.1596
86.2957
86.4319
86.568
86.7041
86.8402
86.9763
87.1124
87.2485
87.3847
87.5208
87.6569
87.793
87.9291
88.0652
88.2013
88.3374
88.4736
88.6097
88.7458
88.8819
89.018
89.1541
89.2902
89.4263
89.5625
89.6986
89.8347
89.9708
90.1069
90.243
90.3791
90.5153
90.6514
90.7875
90.9236
91.0597
91.1958
91.3319
91.468
91.6042
91.7403
91.8764
92.0125
92.1486
92.2847
92.4208
92.5569
92.6931
92.8292
92.9653
93.1014
93.2375
93.3736
93.5097
93.6459
93.782
93.9181
94.0542
94.1903
94.3264
94.4625
94.5986
94.7348
94.8709
95.007
95.1431
95.2792
95.4153
95.5514
95.6875
95.8237
95.9598
96.0959
96.232
96.3681
96.5042
96.6403
96.7765
96.9126
97.0487
97.1848
97.3209
97.457
97.5931
97.7292
97.8654
98.0015
98.1376
98.2737
98.4098
98.5459
98.682
98.8181
98.9543
99.0904
99.2265
99.3626
99.4987
99.6348
99.7709
99.9071

## Sheet: One sim - Mean fil angle
27.9798
71.5311
73.4945
46.6861
59.0311
43.0987
43.4059
58.1509
57.7996
61.9804
61.611
44.6322
44.4109
44.0268
43.7829
43.6232
44.9045
44.8636
43.519
44.5541
44.325
44.1597
43.7698
43.7264
39.4727
44.0735
44.0534
44.0176
44.4781
39.9264
39.7137
39.7138
39.6962
39.4462
39.4404
39.3388
39.4545
39.7791
40.0859
45.2471
44.7537
43.4093
40.5573
43.5162
38.1686
38.0276
43.5586
43.6913
42.1786
40.1902
42.1621
42.105
41.8509
41.7141
41.5478
41.4995
37.9058
41.3857
40.2947
40.2187
40.0353
40.2587
40.6794
40.8686
40.836
40.817
40.7302
40.6161
44.6232
44.9333
39.5289
39.6746
39.9587
40.141
40.2007
40.8995
40.8017
45.3832
45.2589
42.0422
41.8205
41.6327
41.6283
41.8621
43.1862
43.5466
43.741
40.1512
43.4186
42.1401
38.8018
38.7398
40.0807
40.6657
40.22
47.0693
47.3679
47.4457
47.362
39.6754
41.7266
42.0119
42.2704
42.3845
43.8302
42.5386
42.4001
42.1879
41.7115
41.4435
41.2342
41.1847
43.8427
41.124
41.0977
41.2271
44.9352
44.7094
37.7661
37.6955
41.0271
41.2227
41.1368
41.2562
41.403
41.513
39.3465
39.2355
39.2355
43.5142
39.4115
39.3436
37.4187
37.3031
37.0591
37.0478
37.3519
40.6363
40.8583
40.8619
40.7173
40.3754
40.394
42.913
42.6465
42.5085
42.475
42.396
42.5728
40.0318
40.2223
40.3267
40.3924
40.6798
40.8993
43.093
42.9952
43.8858
39.7379
39.8333
41.3176
40.2557
40.0643
39.8013
40.5365
40.6187
41.7488
38.627
38.6631
41.6248
41.5471
41.5007
40.3581
40.7379
40.9333
41.6453
41.7523
44.591
39.0649
38.9587
38.8058
38.6163
38.339
38.486
40.4339
41.4673
42.7699
42.582
42.736
42.9408
43.1569
45.5716
45.5673
40.8281
40.9059
44.7545
42.3066
42.2833
42.2616
37.4932
37.7392
37.991
43.0661
43.0248
42.9231
42.6151
42.1783
41.8766
41.8204
41.6553
40.1605
40.2401
40.6777
41.1594
42.7891
43.0846
43.1966
44.4859
44.7595
45.1122
45.2268
39.1761
38.9631
42.3965
42.2236
42.104
45.7274
42.0854
42.0839
42.0176
41.9238
41.9543
42.0176
42.132
42.8619
42.9868
42.7567
42.4293
42.1898
44.0783
43.9999
39.9475
39.7741
39.4467
39.8375
39.2558
39.9996
40.0956
40.2334
40.2653
40.3371
40.5317
40.8579
41.1424
41.3206
41.3463
41.4721
41.4196
41.5446
44.8128
44.9393
45.1592
44.7016
44.5972
44.5497
41.2401
38.9962
38.7217
38.6044
43.5196
43.6399
43.7561
39.2511
39.2151
39.0013
39.0692
44.4704
44.471
44.647
44.3866
44.3838
40.8818
43.0542
38.8239
38.8239
38.8905
37.6733
42.9609
41.6374
41.779
42.0625
42.2471
42.0933
41.798
41.4262
41.397
41.4625
38.5576
38.4922
43.4145
43.8285
42.6918
40.2857
40.2546
40.1417
40.6838
39.0347
39.1115
39.0308
38.9876
43.6803
43.4761
40.5894
39.0156
38.9345
38.848
38.7966
39.3317
39.5375
39.9524
40.4615
40.6556
40.7299
40.5566
40.4442
40.4141
42.7429
40.731
40.5717
40.5577
39.0637
43.6638
41.1685
42.8241
41.2939
41.2392
41.1041
40.3545
39.8859
38.8285
39.5569
39.1752
41.6193
41.6075
41.7644
42.2078
42.5796
42.3189
42.2773
39.4911
44.8238
43.381
39.2687
39.0706
39.0681
39.097
40.6079
41.6475
38.5569
38.3394
38.5828
40.3636
42.1775
38.5098
38.3603
41.9697
42.1886
42.3007
40.5413
40.5556
40.5439
40.5541
40.5908
44.2844
44.6841
44.8935
39.1035
39.0975
43.0334
38.1445
41.2295
41.3409
42.372
42.6336
38.1458
38.2094
38.2276
38.1135
39.0673
39.038
47.0978
46.6888
39.9821
39.8456
39.9345
40.1511
40.4373
40.3538
40.0561
39.5882
39.342
39.3781
38.3607
45.0425
44.9217
41.2592
41.376
41.5196
41.6265
42.0381
42.1481
41.9132
41.7363
41.5796
41.6423
41.7584
42.8428
41.1058
40.9247
38.7904
38.9473
38.9864
39.0362
44.4181
45.5725
41.326
42.9779
43.0107
43.1621
43.289
43.3197
43.3197
41.7404
41.5884
40.7047
46.2973
46.1068
45.8001
45.5688
39.9419
39.9653
39.9655
39.9888
40.0821
40.122
40.1626
40.3376
40.3788
42.9176
43.0691
43.1981
40.1504
40.1504
39.9341
39.8524
39.832
39.7629
39.613
38.1602
38.1406
38.2571
38.5028
38.6873
38.7174
38.5944
38.5263
38.6304
43.1662
43.168
43.1054
41.4546
41.5733
39.9275
39.9927
43.0633
42.7972
42.7613
39.6439
46.0337
40.7783
46.6592
45.5853
38.9314
38.7157
38.6862
38.4643
38.265
38.1314
38.3241
38.6151
41.1806
41.5542
39.9516
44.5679
39.854
39.7982
39.8016
39.6286
41.1339
38.8391
38.7394
38.8604
44.251
38.9517
38.8699
38.9517
39.0477
38.9665
43.7213
44.0517
44.5533
44.6272
42.2362
43.4173
43.4445
43.3904
43.5267
41.9728
41.7518
38.8794
38.9466
42.3424
42.5687
42.5066
42.5639
42.4906
41.3347
41.1258
41.0908
41.3789
41.3966
40.8389
40.8085
40.454
40.2804
40.1334
40.6179
40.7798
40.9384
45.2264
39.169
42.8295
39.2329
40.0352
40.0421
43.7502
43.6038
43.4236
40.3294
40.0964
37.12
40.2658
40.3989
37.4945
38.9438
38.9549
39.0904
37.9436
37.8731
39.4883
39.3999
37.8236
37.7025
37.1392
37.038
37.1392
36.9664
38.3606
39.3482
39.4374
37.396
37.2769
38.679
39.7899
39.8768
40.0294
38.6904
38.8029
41.4313
41.4762
41.6147
38.5536
37.8601
38.6747
39.7003
40.2169
40.3856
40.5678
42.7752
41.0704
41.1363
41.3021
41.3382
39.9459
40.0012
42.7878
42.8973
38.9537
38.6796
41.3583
41.4312
41.4953
41.8661
41.6219
39.1787
39.0232
39.3234
39.3149
39.2415
39.284
39.5874
38.1324
39.8361
39.6083
39.5397
39.4345
39.4369
39.2474
39.2284
40.8437
41.121
41.121
40.833
40.5587
38.3045
38.3418
38.3707
38.3816
43.951
40.707
40.8693
42.6523
42.3532
42.3459
43.3287
43.2073
43.0984
42.765
40.5621
40.2641
40.5518
40.3981
38.2646
37.9632
39.171
39.2286
39.4459
38.7268
38.6061
39.724
39.6854
39.8415
40.4056
40.3787
41.582
41.6976
41.7283
43.5353
41.2341
41.3472
41.6651
41.8029
41.2858
41.1921
39.9333
40.0502
40.2575
42.6858
42.5391
42.4517
42.5016
42.6762
40.8203
43.6692
43.7829
44.0246
44.2112
44.1436
43.9391
43.7733
43.7677
40.3269
40.1193
40.0402
40.0269
39.8019
39.6428
39.5078
43.1179
39.6611
39.7204
39.8524
39.8524
39.0822
39.0674
39.0674
39.8212
39.9396
39.8075
39.7052
38.2382
38.2666
42.4145
42.4145
42.4389
43.6638
44.0849
44.2739
44.0752
39.4825
38.9575
37.9215
40.2346
40.7756
39.4093
39.4571
39.3346
40.5597
40.6506
40.8308
40.8417
40.8394
40.9515
41.0247
41.0031
40.7935
40.9528
40.4978
40.7062
40.5492
40.4636
40.3631
43.7484
43.7653
43.6776

## Sheet: One sim - SD fil angle
16.4694
16.1705
17.623
19.6742
19.3991
19.3294
19.15
19.3831
19.4147
19.7458
19.8828
18.3222
18.2065
18.1264
18.0896
18.0304
18.2127
18.1927
18.047
18.1941
18.1864
18.1505
18.0433
17.978
17.18
17.9908
17.969
17.9876
18.0924
17.2195
17.0424
16.9196
16.912
16.978
17.086
17.0457
17.0678
17.1519
17.2529
18.261
18.0462
17.8108
17.6101
17.8869
16.9203
16.9657
18.1691
18.2532
18.1384
17.7315
17.9805
17.91
17.9193
17.9432
17.937
17.818
16.4376
17.6869
17.4729
17.3656
17.2438
17.2174
17.2735
17.3021
17.326
17.2843
17.2448
17.2773
18.1091
18.2768
17.6185
17.8251
17.8143
17.7695
17.6411
17.6226
17.5301
18.5222
18.5399
17.5922
17.5286
17.539
17.5532
17.635
18.0388
18.0303
17.9362
17.3724
17.987
17.8293
17.2777
17.2849
17.4741
17.5806
17.5689
18.9765
19.0661
19.0575
19.0119
17.8298
18.0517
18.0786
18.1146
18.1073
18.068
18.1364
18.1852
18.2143
18.1273
18.0247
18.022
18.0269
18.3259
17.8793
17.7647
17.6205
18.2251
18.2244
16.0014
16.0114
17.2454
17.2708
17.3372
17.4444
17.579
17.6977
17.5301
17.5748
17.5279
18.0128
17.6071
17.5551
16.3581
16.236
16.2081
16.2507
16.3111
17.4206
17.3045
17.2242
17.1599
17.0551
17.0838
17.7651
17.7019
17.6797
17.711
17.7779
17.8004
17.2829
17.28
17.3486
17.4599
17.5673
17.6389
17.9841
18.0633
18.4401
17.2597
17.2235
17.5006
17.3893
17.4117
17.3405
17.4948
17.5701
17.8913
16.989
16.9037
17.7076
17.6193
17.5649
17.3814
17.374
17.3467
17.4391
17.4984
18.1639
16.7977
16.9292
17.0411
17.0359
16.6833
16.6196
17.3443
17.5786
17.8902
17.9214
17.8839
17.8694
17.8984
18.4936
18.6749
17.7486
17.6463
18.3621
17.7695
17.7073
17.6523
15.8018
15.7492
15.7707
17.4413
17.4991
17.4925
17.4176
17.3142
17.242
17.173
17.1301
16.8513
17.0611
17.3052
17.4761
17.7676
17.766
17.7381
17.9855
18.041
18.11
18.1401
17.1826
17.2068
17.8039
17.7827
17.7872
18.4862
17.8595
17.9083
17.9077
17.854
17.7873
17.8176
17.9065
17.9197
17.9033
17.8684
17.7932
17.6914
18.1805
18.2107
17.2099
17.2596
17.3834
17.5434
17.497
17.5801
17.6109
17.6269
17.6849
17.6522
17.7258
17.7367
17.7934
17.7867
17.8184
17.8447
17.8409
17.8039
18.0817
18.0888
18.1948
18.1341
18.0728
18.0951
17.5688
17.2769
17.1716
17.1291
18.2335
18.2611
18.2944
17.1023
17.0515
17.0892
17.14
18.2918
18.333
18.3599
18.3225
18.2855
17.4045
17.9403
16.9002
16.8579
16.8954
15.9466
17.8876
17.396
17.3861
17.4492
17.5398
17.5782
17.4627
17.4017
17.3784
17.4258
17.2387
17.3029
18.2572
18.3788
18.0698
17.7354
17.7075
17.6103
17.6124
17.1875
17.1327
17.1315
17.1403
18.1001
18.0247
17.4584
17.2012
17.2572
17.3381
17.3619
17.4143
17.3746
17.4237
17.4732
17.5509
17.5636
17.521
17.4966
17.4708
17.8276
17.6338
17.6583
17.7034
17.3203
18.1308
17.2648
17.7551
17.2662
17.3534
17.4443
17.3487
17.1675
17.1743
17.1215
17.0937
17.5047
17.5188
17.633
17.7114
17.7236
17.5745
17.5228
17.3494
18.1592
17.7769
17.0757
16.9334
16.9631
16.9891
17.2013
17.3916
16.8938
16.8945
16.9575
17.408
17.7592
17.0174
17.0037
17.8509
17.8655
17.9035
17.4636
17.3876
17.3657
17.3344
17.4659
18.1852
18.3218
18.3549
17.3954
17.371
18.1759
16.7922
17.6874
17.8534
18.064
18.2565
17.0928
17.1626
17.1723
17.2085
17.9814
17.957
18.7201
18.6603
18.0957
18.0392
17.9821
17.866
17.6917
17.5641
17.4775
17.4713
17.4552
17.4772
17.1355
18.5677
18.6096
17.5593
17.6352
17.7169
17.8326
17.7277
17.5942
17.3449
17.367
17.3889
17.4744
17.3789
17.7289
17.3545
17.4168
17.0145
16.9863
16.9576
16.9105
17.9828
18.3698
17.4792
17.8622
17.9605
18.0076
18.0012
17.9627
17.9353
17.8805
17.8853
17.7479
18.6771
18.7028
18.648
18.5567
17.1488
17.1711
17.1873
17.115
16.9868
16.8978
16.8844
16.9917
17.0839
17.8049
17.8799
17.9199
17.349
17.3098
17.2382
17.1538
17.1616
17.1316
17.1907
16.6772
16.6222
16.564
16.5966
16.6808
16.6985
16.7539
16.7667
16.8664
17.7633
17.7901
17.75
17.3339
17.3553
17.3194
17.3043
17.4623
17.4776
17.5722
17.4551
18.4128
17.6742
18.5426
18.3878
17.3334
17.1803
17.0799
16.9527
16.8801
16.8845
17.0047
17.1123
17.5865
17.5954
17.3437
18.2084
17.2158
17.1241
17.0641
17.1011
17.3598
17.1275
17.0822
16.982
17.8765
16.9543
16.9811
16.9388
16.9387
16.9713
17.8459
17.968
18.0712
18.1443
17.8752
17.9669
18.0899
18.1756
18.2532
18.2085
18.0844
17.2372
17.0881
17.8495
17.8743
17.9276
17.9066
17.8951
17.8306
17.8282
17.782
17.6672
17.6372
17.5887
17.5478
17.4281
17.3525
17.3212
17.415
17.3999
17.3622
18.3361
17.0702
17.5768
17.2904
17.3309
17.3329
18.131
18.0684
18.0204
17.2526
17.2173
15.798
17.1691
17.2044
15.9468
17.0191
16.9926
16.9956
16.0894
16.0095
16.9324
16.9969
16.3555
16.3987
15.8609
15.7332
15.576
15.5397
16.7249
16.8216
16.8275
16.0201
16.1075
17.0397
17.1708
17.2166
17.2511
17.0038
16.9406
17.2996
17.1359
17.0858
16.5331
15.9785
16.7127
17.0937
17.2334
17.2779
17.251
17.7468
17.3685
17.4349
17.5137
17.5697
17.4299
17.5296
17.6647
17.7604
17.1401
17.0499
17.8001
17.7319
17.7268
17.7477
17.773
17.5463
17.5224
17.5763
17.5872
17.6032
17.6103
17.555
16.4443
17.3765
17.3296
17.2971
17.3011
17.31
17.3689
17.4266
17.5837
17.6273
17.5888
17.5632
17.5098
16.6044
16.649
16.7797
16.955
17.9551
17.5008
17.5136
17.6778
17.713
17.7636
18.0135
17.9179
17.8131
17.6595
17.2643
17.263
17.3327
17.4653
17.3167
17.2678
17.44
17.465
17.5291
17.3869
17.3662
17.4924
17.4663
17.4545
17.4961
17.4102
17.6699
17.6893
17.8162
18.339
17.7583
17.7299
17.7872
17.816
17.7284
17.6267
17.5619
17.5738
17.5658
17.8696
17.7652
17.6465
17.7164
17.7634
17.4296
18.0618
18.0833
18.0824
18.0764
18.0396
18.0791
18.0922
18.1133
17.5335
17.4818
17.4005
17.4103
17.3139
17.2401
17.18
18.0566
17.155
17.1557
17.1676
17.1544
17.0119
16.9991
16.9808
17.0148
17.0436
17.0427
17.0643
16.8961
17.0226
17.7509
17.7059
17.6978
18.0515
18.0758
18.1262
18.1333
17.4509
17.3029
16.5789
17.3818
17.3838
17.2754
17.2918
17.3403
17.5108
17.6231
17.6789
17.7354
17.7963
17.7958
17.6753
17.5386
17.4572
17.4737
17.2986
17.1404
17.0254
16.9306
17.0344
18.1739
18.2401
18.2598

## Sheet: One sim - Time(s) - Fil angle
8.65309e-05
0.1362
0.272313
0.408426
0.544539
0.680652
0.816765
0.952878
1.08899
1.2251
1.36122
1.49733
1.63344
1.76956
1.90567
2.04178
2.1779
2.31401
2.45012
2.58623
2.72235
2.85846
2.99457
3.13069
3.2668
3.40291
3.53903
3.67514
3.81125
3.94736
4.08348
4.21959
4.3557
4.49182
4.62793
4.76404
4.90016
5.03627
5.17238
5.30849
5.44461
5.58072
5.71683
5.85295
5.98906
6.12517
6.26129
6.3974
6.53351
6.66963
6.80574
6.94185
7.07796
7.21408
7.35019
7.4863
7.62242
7.75853
7.89464
8.03076
8.16687
8.30298
8.43909
8.57521
8.71132
8.84743
8.98355
9.11966
9.25577
9.39189
9.528
9.66411
9.80022
9.93634
10.0725
10.2086
10.3447
10.4808
10.6169
10.753
10.8891
11.0252
11.1614
11.2975
11.4336
11.5697
11.7058
11.8419
11.978
12.1141
12.2503
12.3864
12.5225
12.6586
12.7947
12.9308
13.0669
13.2031
13.3392
13.4753
13.6114
13.7475
13.8836
14.0197
14.1558
14.292
14.4281
14.5642
14.7003
14.8364
14.9725
15.1086
15.2447
15.3809
15.517
15.6531
15.7892
15.9253
16.0614
16.1975
16.3337
16.4698
16.6059
16.742
16.8781
17.0142
17.1503
17.2864
17.4226
17.5587
17.6948
17.8309
17.967
18.1031
18.2392
18.3753
18.5115
18.6476
18.7837
18.9198
19.0559
19.192
19.3281
19.4643
19.6004
19.7365
19.8726
20.0087
20.1448
20.2809
20.417
20.5532
20.6893
20.8254
20.9615
21.0976
21.2337
21.3698
21.5059
21.6421
21.7782
21.9143
22.0504
22.1865
22.3226
22.4587
22.5948
22.731
22.8671
23.0032
23.1393
23.2754
23.4115
23.5476
23.6838
23.8199
23.956
24.0921
24.2282
24.3643
24.5004
24.6365
24.7727
24.9088
25.0449
25.181
25.3171
25.4532
25.5893
25.7254
25.8616
25.9977
26.1338
26.2699
26.406
26.5421
26.6782
26.8144
26.9505
27.0866
27.2227
27.3588
27.4949
27.631
27.7671
27.9033
28.0394
28.1755
28.3116
28.4477
28.5838
28.7199
28.856
28.9922
29.1283
29.2644
29.4005
29.5366
29.6727
29.8088
29.945
30.0811
30.2172
30.3533
30.4894
30.6255
30.7616
30.8977
31.0339
31.17
31.3061
31.4422
31.5783
31.7144
31.8505
31.9866
32.1228
32.2589
32.395
32.5311
32.6672
32.8033
32.9394
33.0756
33.2117
33.3478
33.4839
33.62
33.7561
33.8922
34.0283
34.1645
34.3006
34.4367
34.5728
34.7089
34.845
34.9811
35.1172
35.2534
35.3895
35.5256
35.6617
35.7978
35.9339
36.07
36.2062
36.3423
36.4784
36.6145
36.7506
36.8867
37.0228
37.1589
37.2951
37.4312
37.5673
37.7034
37.8395
37.9756
38.1117
38.2478
38.384
38.5201
38.6562
38.7923
38.9284
39.0645
39.2006
39.3368
39.4729
39.609
39.7451
39.8812
40.0173
40.1534
40.2895
40.4257
40.5618
40.6979
40.834
40.9701
41.1062
41.2423
41.3784
41.5146
41.6507
41.7868
41.9229
42.059
42.1951
42.3312
42.4674
42.6035
42.7396
42.8757
43.0118
43.1479
43.284
43.4201
43.5563
43.6924
43.8285
43.9646
44.1007
44.2368
44.3729
44.509
44.6452
44.7813
44.9174
45.0535
45.1896
45.3257
45.4618
45.598
45.7341
45.8702
46.0063
46.1424
46.2785
46.4146
46.5507
46.6869
46.823
46.9591
47.0952
47.2313
47.3674
47.5035
47.6396
47.7758
47.9119
48.048
48.1841
48.3202
48.4563
48.5924
48.7286
48.8647
49.0008
49.1369
49.273
49.4091
49.5452
49.6813
49.8175
49.9536
50.0897
50.2258
50.3619
50.498
50.6341
50.7702
50.9064
51.0425
51.1786
51.3147
51.4508
51.5869
51.723
51.8592
51.9953
52.1314
52.2675
52.4036
52.5397
52.6758
52.8119
52.9481
53.0842
53.2203
53.3564
53.4925
53.6286
53.7647
53.9008
54.037
54.1731
54.3092
54.4453
54.5814
54.7175
54.8536
54.9898
55.1259
55.262
55.3981
55.5342
55.6703
55.8064
55.9425
56.0787
56.2148
56.3509
56.487
56.6231
56.7592
56.8953
57.0314
57.1676
57.3037
57.4398
57.5759
57.712
57.8481
57.9842
58.1204
58.2565
58.3926
58.5287
58.6648
58.8009
58.937
59.0731
59.2093
59.3454
59.4815
59.6176
59.7537
59.8898
60.0259
60.162
60.2982
60.4343
60.5704
60.7065
60.8426
60.9787
61.1148
61.251
61.3871
61.5232
61.6593
61.7954
61.9315
62.0676
62.2037
62.3399
62.476
62.6121
62.7482
62.8843
63.0204
63.1565
63.2926
63.4288
63.5649
63.701
63.8371
63.9732
64.1093
64.2454
64.3816
64.5177
64.6538
64.7899
64.926
65.0621
65.1982
65.3343
65.4705
65.6066
65.7427
65.8788
66.0149
66.151
66.2871
66.4232
66.5594
66.6955
66.8316
66.9677
67.1038
67.2399
67.376
67.5122
67.6483
67.7844
67.9205
68.0566
68.1927
68.3288
68.4649
68.6011
68.7372
68.8733
69.0094
69.1455
69.2816
69.4177
69.5538
69.69
69.8261
69.9622
70.0983
70.2344
70.3705
70.5066
70.6427
70.7789
70.915
71.0511
71.1872
71.3233
71.4594
71.5955
71.7317
71.8678
72.0039
72.14
72.2761
72.4122
72.5483
72.6844
72.8206
72.9567
73.0928
73.2289
73.365
73.5011
73.6372
73.7733
73.9095
74.0456
74.1817
74.3178
74.4539
74.59
74.7261
74.8623
74.9984
75.1345
75.2706
75.4067
75.5428
75.6789
75.815
75.9512
76.0873
76.2234
76.3595
76.4956
76.6317
76.7678
76.9039
77.0401
77.1762
77.3123
77.4484
77.5845
77.7206
77.8567
77.9929
78.129
78.2651
78.4012
78.5373
78.6734
78.8095
78.9456
79.0818
79.2179
79.354
79.4901
79.6262
79.7623
79.8984
80.0345
80.1707
80.3068
80.4429
80.579
80.7151
80.8512
80.9873
81.1235
81.2596
81.3957
81.5318
81.6679
81.804
81.9401
82.0762
82.2124
82.3485
82.4846
82.6207
82.7568
82.8929
83.029
83.1651
83.3013
83.4374
83.5735
83.7096
83.8457
83.9818
84.1179
84.2541
84.3902
84.5263
84.6624
84.7985
84.9346
85.0707
85.2068
85.343
85.4791
85.6152
85.7513
85.8874
86.0235
86.1596
86.2957
86.4319
86.568
86.7041
86.8402
86.9763
87.1124
87.2485
87.3847
87.5208
87.6569
87.793
87.9291
88.0652
88.2013
88.3374
88.4736
88.6097
88.7458
88.8819
89.018
89.1541
89.2902
89.4263
89.5625
89.6986
89.8347
89.9708
90.1069
90.243
90.3791
90.5153
90.6514
90.7875
90.9236
91.0597
91.1958
91.3319
91.468
91.6042
91.7403
91.8764
92.0125
92.1486
92.2847
92.4208
92.5569
92.6931
92.8292
92.9653
93.1014
93.2375
93.3736
93.5097
93.6459
93.782
93.9181
94.0542
94.1903
94.3264
94.4625
94.5986
94.7348
94.8709
95.007
95.1431
95.2792
95.4153
95.5514
95.6875
95.8237
95.9598
96.0959
96.232
96.3681
96.5042
96.6403
96.7765
96.9126
97.0487
97.1848
97.3209
97.457
97.5931
97.7292
97.8654
98.0015
98.1376
98.2737
98.4098
98.5459
98.682
98.8181
98.9543
99.0904
99.2265
99.3626
99.4987
99.6348
99.7709
99.9071

## Sheet: One sim - Mean mem vel
0.351186
0.371456
0.398455
0.391296
0.393232
0.378281
0.376437
0.346812
0.336809
0.325642
0.344575
0.328597
0.337717
0.351421
0.330116
0.349336
0.324852
0.349065
0.351527
0.348931
0.396035
0.348777
0.343296
0.350513
0.359617
0.362826
0.336467
0.334931
0.323488
0.334516
0.338727
0.334087
0.33158
0.330081
0.346405
0.354574
0.359612
0.323279
0.331255
0.353193
0.358857
0.33032
0.343738
0.365479
0.366711
0.34115
0.318096
0.406303
0.345449
0.32305
0.34908
0.357227
0.355427
0.348464
0.339808
0.332092
0.340061
0.35983
0.343283
0.323071
0.343899
0.349682
0.354797
0.326917
0.361497
0.347658
0.354907
0.370552
0.498689
0.327859
0.353835
0.342299
0.346309
0.34064
0.384191
0.336783
0.355101
0.347147
0.345098
0.37652
0.34243
0.340253
0.33657
0.359532
0.349477
0.338802
0.33767
0.328723
0.361277
0.32353
0.3511
0.338121
0.324893
0.337003
0.360156
0.345634
0.344399
0.343015
0.371985
0.337147
0.344509
0.327305
0.339548
0.339619
0.351379
0.322389
0.343588
0.353245
0.344855
0.327176
0.324217
0.342811
0.328754
0.323629
0.330685
0.343101
0.344538
0.34124
0.345036
0.339419
0.352509
0.319159
0.353127
0.331343
0.349908
0.365407
0.329095
0.337117
0.362907
0.341128
0.38459
0.326788
0.320244
0.326805
0.386568
0.37398
0.345739
0.344482
0.350582
0.348885
0.344045
0.335638
0.355758
0.337581
0.370734
0.331601
0.341066
0.328615
0.357586
0.31422
0.349747
0.345754
0.326464
0.339734
0.36006
0.366871
0.359004
0.328452
0.329336
0.337649
0.342565
0.342424
0.33342
0.359636
0.352614
0.333766
0.358748
0.361703
0.352056
0.353762
0.338103
0.364339
0.327423
0.317629
0.357913
0.486423
0.352283
0.346406
0.339376
0.319048
0.345935
0.364822
0.352178
0.356373
0.339041
0.33929
0.348512
0.341647
0.340783
0.352318
0.346451
0.324895
0.357138
0.35871
0.31211
0.329883
0.352532
0.340879
0.333457
0.335251
0.331071
0.364636
0.331333
0.350224
0.350167
0.32811
0.347183
0.350866
0.342325
0.353511
0.327292
0.356268
0.336093
0.334981
0.374315
0.340042
0.333585
0.342862
0.375236
0.367672
0.354297
0.342315
0.345941
0.347446
0.36007
0.343286
0.325634
0.348652
0.324226
0.367444
0.476086
0.343412
0.328831
0.341823
0.344458
0.352072
0.340153
0.347044
0.342941
0.348831
0.317018
0.355476
0.334226
0.337785
0.339961
0.344964
0.38554
0.347014
0.364174
0.359439
0.337776
0.345213
0.329526
0.355409
0.32907
0.34144
0.346219
0.3527
0.373363
0.33581
0.325661
0.319044
0.360836
0.335034
0.342657
0.349347
0.318898
0.368599
0.352105
0.356737
0.364198
0.349197
0.357153
0.33927
0.349924
0.339877
0.340569
0.334306
0.371791
0.410062
0.327589
0.353205
0.385491
0.336994
0.334857
0.34921
0.331526
0.313963
0.331177
0.370699
0.358817
0.349246
0.420034
0.364247
0.352362
0.350956
0.346485
0.36004
0.360462
0.324865
0.34526
0.329208
0.366815
0.347532
0.34978
0.372946
0.331027
0.321094
0.343842
0.375259
0.340885
0.32254
0.324169
0.329455
0.384234
0.389453
0.349665
0.340543
0.347624
0.351991
0.328721
0.324455
0.332767
0.324858
0.394677
0.347061
0.341849
0.374751
0.359171
0.337361
0.353101
0.360222
0.333552
0.363831
0.331794
0.369852
0.334378
0.32404
0.325441
0.347177
0.326258
0.344918
0.322818
0.341472
0.348226
0.36346
0.340164
0.378459
0.339212
0.35639
0.347359
0.358287
0.323426
0.346376
0.358705
0.34406
0.339646
0.337119
0.329473
0.353515
0.389332
0.346532
0.341531
0.342615
0.327827
0.333503
0.344539
0.328116
0.341534
0.327733
0.345074
0.357893
0.357471
0.372923
0.35064
0.37442
0.340737
0.347839
0.339459
0.337785
0.352872
0.339638
0.341435
0.339414
0.366834
1.03474
0.345002
0.35384
0.339688
0.328544
0.321704
0.352439
0.36493
0.327196
0.348034
0.353952
0.33525
0.365499
0.329754
0.363791
0.34002
0.345613
0.337315
0.328941
0.333458
0.368365
0.359599
0.333317
0.338943
0.335743
0.369585
0.320906
0.360879
0.33148
0.329258
0.339152
0.320093
0.336656
0.344181
0.323101
0.321528
0.348741
0.351259
0.512555
0.323764
0.331386
0.3388
0.348711
0.334599
0.332671
0.324207
0.371391
0.359001
0.319296
0.342637
0.331458
0.343213
0.347895
0.327094
0.331351
0.330755
0.348215
0.345959
0.403962
0.356074
0.375122
0.332094
0.340602
0.343165
0.32997
0.33747
0.34865
0.349494
0.332309
0.380691
0.326392
0.312966
0.324731
0.358703
0.349999
0.367977
0.328507
0.33761
0.33981
0.372152
0.351715
0.421751
0.33201
0.3601
0.349571
0.352342
0.353142
0.323648
0.329168
0.345933
0.34226
0.339319
0.339667
0.336764
0.355077
0.321858
0.339468
0.340228
0.330185
0.321306
0.345192
0.337904
0.315391
0.338818
0.335265
0.351501
0.321673
0.324803
0.340612
0.35938
0.343428
0.360774
0.351682
0.335798
0.344453
0.346254
0.352763
0.347692
0.337632
0.35211
0.343562
0.362111
0.333351
0.330156
0.338669
0.333635
0.345095
0.365365
0.517345
0.332887
0.330304
0.344459
0.338927
0.344457
0.35823
0.325452
0.346189
0.344064
0.356121
0.376702
0.334718
0.336329
0.476581
0.371657
0.351518
0.345227
0.357274
0.351022
0.360768
0.323769
0.349635
0.330594
0.36017
0.387318
0.32631
0.338544
0.331539
0.322918
0.32655
0.351368
0.321815
0.332371
0.340882
0.347591
0.328727
0.384144
0.342776
0.334163
0.325893
0.370414
0.401801
0.346141
0.35676
0.348509
0.327359
0.351245
0.346061
0.327532
0.343628
0.350943
0.370684
0.349714
0.330091
0.353127
0.346787
0.332651
0.345211
0.331244
0.351197
0.321992
0.351372
0.346588
0.331182
0.350005
0.365656
0.337565
0.400906
0.34253
0.328701
0.327443
0.348025
0.35352
0.383383
0.344818
0.375501
0.356833
0.387338
0.355313
0.355572
0.353665
0.377726
0.350276
0.339095
0.355638
0.348645
0.343432
0.323878
0.342445
0.35946
0.343085
0.349465
0.327612
0.364676
0.387087
0.33771
0.339595
0.343977
0.358286
0.334926
0.349081
0.362892
0.356974
0.338346
0.348911
0.329706
0.371419
0.329891
0.358294
0.338623
0.350151
0.384013
0.361504
0.340132
0.353997
0.361703
0.338818
0.350234
0.347244
0.377567
0.345573
0.344431
0.341138
0.349603
0.326603
0.360155
0.347032
0.345127
0.332872
0.354725
0.345112
0.330643
0.357324
0.326561
0.34736
0.380393
0.321741
0.340059
0.332324
0.358228
0.342999
0.330222
0.327522
0.352818
0.340931
0.318093
0.335001
0.351342
0.355909
0.353571
0.356843
0.336953
0.343283
0.342683
0.337624
0.354344
0.336594
0.335179
0.357865
0.345676
0.364266
0.357912
0.354845
0.340717
0.331149
0.346741
0.34162
0.329292
0.347368
0.333587
0.345854
0.332572
0.340409
0.339447
0.30787
0.341682
0.353284
0.352653
0.368736
0.385664
0.33813
0.376445
0.351578
0.33981
0.339353
0.363578
0.338096
0.362767
0.35108
0.317885
0.365349
0.314898
0.381378
0.355424
0.341997
0.389299
0.348577
0.342024
0.334021
0.391451
0.337553
0.336166
0.363375
0.333673
0.348489
0.347843
0.399151
0.33012
0.322251
0.311494
0.327982
0.348608
0.377873
0.364464
0.328805
0.33702
0.340999
0.339083
0.352372
0.332381
0.374091
0.365181
0.347448
0.335545
0.350338
0.339234
0.346068
0.351091
0.330513
0.340109
0.336757
0.357283
0.344679
0.322427
0.337645
0.376733
0.326776
0.3623
0.342092
0.343334
0.412507
0.378594
0.345456
0.342293
0.333359
0.360004
0.346326
0.348877
0.332153
0.352785
0.36378
0.340012
0.351078
0.318757
0.361972
0.345765
0.337676
0.350763
0.357846
0.360728
0.344706
0.338488
0.344124
0.359202
0.351564
0.404119
0.342681
0.354097
0.343001
0.340739
0.335027
0.343329
0.333272
0.345849
0.324396
0.349691
0.370098
0.331628
0.313291
0.367418
0.327772
0.342592
0.349768
0.340263
0.333184
0.337985
0.334268
0.321158
0.346914
0.341712
0.321431
0.346227
0.339202
0.336203
0.355135
0.391389
0.35233
0.322562
0.325299
0.34165
0.33336
0.36697
0.361851
0.3384
0.336185
0.333574
0.343939
0.382382
0.462351
0.34894
0.32829
0.337625
0.326838
0.353379
0.346536
0.347144
0.341816
0.356962
0.352084
0.377
0.342793
0.368174
0.373363
0.393368
0.351064
0.357025
0.366136
0.331866
0.332418
0.34595
0.367981
0.350202
0.3671
0.354168
0.347818
0.337061
0.333561
0.354868
0.349306
0.355895
0.350931
0.368895
0.366703
0.343176
0.352324
0.324724
0.352794
0.340544
0.333752
0.340936
0.350702
0.348346
0.345375
0.356682
0.355851
0.366509
0.345359
0.468304
0.343277
0.348014
0.354692
0.321478
0.341012
0.340687
0.338484
0.340504
0.365813
0.335403
0.346298
0.338473
0.345267
0.360831
0.352381
0.335935
0.356241
0.336477
0.325023
0.336753
0.35853
0.537132
0.341087
0.365821
0.368392
0.365257
0.354981
0.337124
0.361626
0.326976
0.355894
0.326543
0.377967
0.337623
0.341115
0.346718
0.326193
0.325979
0.342355
0.343832
0.330053
0.346116
0.346495
0.351329
0.333562
0.329719
0.341704
0.34737
0.331968
0.339901
0.325094
0.332355
0.35423
0.343206
0.351547
0.353147
0.343573
0.377093
0.348981
0.359773
0.350855
0.365746
0.336988
0.396175
0.357816
0.348006
0.319207
0.33509
0.352657
0.342282
0.333432
0.350587
0.347651
0.357599
0.337301
0.355241
0.349212
0.328677
0.342912
0.329023
0.336168
0.341145
0.348371
0.352979
0.334011
0.326582
0.40398
0.334509
0.351582
0.36406
0.34224
0.336373
0.388175
0.320799
0.3235
0.354587
0.3454
0.336107
0.355913
0.457577
0.340331
0.345303
0.37194
0.341289
0.336717
0.356825
0.363251
0.340212
0.348726
0.417843
0.36385
0.326377
0.366882
0.324751
0.330873
0.34477
0.317919
0.333787
0.346331
0.341227
0.36231
0.404039
0.355764
0.361705
0.324173
0.366752
0.339657
0.34219
0.354744
0.33895
0.348557
0.319758
0.339229
0.34764
0.347402
0.354298
0.341964
0.351546
0.344526
0.340223
0.344035
0.422418
0.372303
0.355125
0.351222
0.362414
0.329217
0.332007
0.335006
0.345482
0.346935
0.329832
0.3344
0.376144
0.376794
0.323477
0.336803
0.328776
0.360369
0.332675
0.371269
0.341259
0.360257
0.335647
0.347529
0.347249
0.356352
0.392348
0.348173
0.343885
0.349305
0.346649
0.343259
0.365719
0.318179
0.368527
0.334114
0.334299
0.343756
0.332156
0.331261
0.350725
0.332783
0.341429
0.328733
0.382032
0.341714
0.342401
0.350273
0.392633
0.335713
0.363114
0.579824
0.351479
0.380458
0.355922
0.351783
0.328326
0.36546
0.386147
0.343472
0.336654
0.347478
0.372752
0.337807
0.36195
0.328209
0.374461
0.336687
0.360516
0.353138
0.334943
0.326166
0.360892
0.415086
0.358164
0.340031
0.329114
0.355585
0.337555
0.356952
0.320827
0.343822
0.327569
0.336986
0.334397
0.319933
0.349137
0.339652
0.346953
0.346217
0.402682
0.37647
0.345903
0.322265
0.353781
0.350303
0.339767
0.345017
0.35806
0.326833
0.346822
0.33301
0.320801
0.366299
0.334454
0.351245
0.360749
0.362915
0.32864
0.321206
0.37487
0.346561
0.354801
0.340881
0.349959
0.338288
0.359035
0.344301
0.347891
0.34069
0.354532
0.361878
0.326256
0.346164
0.343816
0.349793
0.355786
0.340012
0.351303
0.357077
0.337918
0.346961
0.327497
0.391264
0.339427
0.347142
0.346259
0.348762
0.347419
0.343963
0.354898
0.335861
0.362395
0.331377
0.350893
0.33157
0.358772
0.340993
0.336876
0.363546
0.351371
0.341451
0.324543
0.334784
0.358747
0.33603
0.335246
0.359556
0.382698
0.33944
0.344741
0.37597
0.33506
0.350299
0.364722
0.336188
0.334454
0.314598
0.331165
0.345614
0.330138
0.31824
0.331376
0.348605
0.372636
0.333878
0.352194
0.327677
0.331459
0.340308
0.364772
0.344489
0.341296
0.338801
0.346728
0.320027
0.332145
0.357336
0.340507
0.335017
0.39272
0.353688
0.32477
0.336366
0.354853
0.335771
0.351411
0.36466
0.327386
0.339302
0.354077
0.346901
0.350489
0.34187
0.375904
0.355411
0.344504
0.367004
0.321426
0.354192
0.31835
0.340864
0.340195
0.34019
0.354171
0.321851
0.339624
0.335662
0.340172
0.347697
0.349546
0.34923
0.35863
0.334767
0.360207
0.338523
1.03254
0.337478
0.359792
0.349174
0.348206
0.327241
0.34878
0.324305
0.362601
0.359778
0.346917
0.342504
0.337514
0.345875
0.338254
0.352094
0.353022
0.346725
0.42596
0.354043
0.363175
0.339117
0.353969
0.346757
0.336117
0.357361
0.35412
0.353601
0.327583
0.362159
0.344403
0.367016
0.34144
0.328852
0.377316
0.353642
0.351718
0.334737
0.352893
0.363392
0.336419
0.327299
0.332012
0.354248
0.332387
0.375814
0.355724
0.333178
0.340581
0.336723
0.336024
0.348002
0.337376
0.35644
0.340914
0.334074
0.347237
0.3917
0.342846
0.333847
0.333532
0.37328
0.356545
0.36399
0.345871
0.329491
0.327189
0.328572
0.375785
0.335677
0.381586
0.351617
0.333397
0.345549
0.363201
0.383754
0.33187
0.389413
0.338771
0.342801
0.411317
0.344071
0.351301
0.366465
0.363276
0.33644
0.345555
0.351094
0.347342
0.375909
0.332764
0.340025
0.336657
0.349583
0.363244
0.335389
0.34239
0.386679
0.343207
0.329159
0.358589
0.41635
0.353828
0.331985
0.353515
0.350891
0.34664
0.356248
0.328802
0.345283
0.364262
0.346145
0.342195
0.345338
0.331618
0.385821
0.344706
0.354817
0.336129
0.341226
0.342061
0.332249
0.419627
0.363897
0.360019
0.365233
0.347019
0.353622
0.344743
0.351332
0.315321
0.350116
0.364147
0.352176
0.330994
0.344613
0.355621
0.324731
0.328403
0.362415
0.335273
0.343391
0.327107
0.337476
0.355906
0.348123
0.346772
0.33785
0.325844
0.366204
0.360031
0.345259
0.337429
0.321759
0.366252
0.348869
0.342019
0.335279
0.341713
0.340448
0.344243
0.32079
0.321997
0.331835
0.336897
0.352217
0.347979
0.357063
0.326937
0.344686
0.353562
0.315411
0.32538
0.333671
0.346286
0.34798
0.34485
0.330394
0.345966
0.34283
0.353098
0.339711
0.345978
0.348878
0.323949
0.336363
0.343441
0.356267
0.341942
0.336363
0.337192
0.333342
0.350758
0.358423
0.361473
0.326701
0.340124
0.339001
0.344115
0.338225
0.346495
0.352793
0.353966
0.344582
0.321471
0.335638
0.333462
0.333823
0.325807
0.345743
0.321229
0.348572
0.333234
0.34612
0.330924
0.337565
0.364541
0.357106
0.337359
0.340057
0.373494
0.328402
0.363962
0.33877
0.345974
0.331113
0.316653
0.382747
0.350068
0.357559
0.364147
0.315094
0.348122
0.354096
0.348498
0.319188
0.351024
0.353416
0.324764
0.336902
0.34675
0.342915
0.327565
0.325722
0.32528
0.375658
0.336168
0.353105
0.364592
0.349949
0.338284
0.322609
0.346898
0.331999
0.340743
0.355623
0.339526
0.353665
0.356186
0.338831
0.350694
0.409339
0.348825
0.333282
0.377038
0.351859
0.343192
0.346506
0.345638
0.323989
0.329436
0.35121
0.343487
0.333587
0.341814
0.353984
0.332862
0.357796
0.351917
0.34719
0.351304
0.361257
0.383819
0.338861
0.341983
0.330113
0.348512
0.336987
0.351366
0.366562
0.360267
0.331183
0.327197
0.344252
0.336776
0.364365
0.331815
0.340559
0.343953
0.340436
0.328199
0.33821
0.342821
0.33731
0.332311
0.341572
0.333614
0.359794
0.378041
0.340015
0.331372
0.353431
0.326472
0.329702
0.333883
0.327113
0.353118
0.565081
0.331677
0.341862
0.345184
0.360832
0.353691
0.348613
0.331734
0.332245
0.341959
0.33431
0.349378
0.355178
0.330209
0.33126
0.351163
0.381003
0.339835
0.345591
0.329126
0.340437
0.327571
0.387611
0.350785
0.341333
0.33624
0.364938
0.337084
0.36027
0.332302
0.366618
0.345146
0.3285
0.340684
0.335577
0.323799
0.330646
0.339828
0.393077
0.350986
0.332377
0.344273
0.361791
0.335967
0.362725
0.359766
0.365926
0.383527
0.336197
0.357722
0.357715
0.356878
0.358556
0.365911
0.337386
0.350781
0.344454
0.348779
0.3329
0.384597
0.359225
0.3279
0.350333
0.341855
0.337499
0.363031
0.348266
0.356854
0.327794
0.376691
0.352492
0.365223
0.344253
0.320707
0.322927
0.339354
0.3204
0.321606
0.339233
0.339165
0.340677
0.362369
0.337359
0.343583
0.322667
0.320404
0.333042
0.326232
0.345554
0.319553
0.335674
0.328122
0.314908
0.31279
0.383339
0.356962
0.347188
0.403423
0.364147
0.34253
0.370861
0.336646
0.368877
0.337124
0.330497
0.350358
0.336686
0.335268
0.362009
0.338083
0.347094
0.327163
0.323353
0.342196
0.328832
0.340429
0.334621
0.355686
0.350121
0.366852
0.342183
0.332758
0.33475
0.328331
0.358137
0.319372
0.357275
0.326008
0.315423
0.35793
0.349143
0.378501
0.351784
0.333162
0.344779
0.342037
0.335516
0.341653
0.35812
0.36817
0.325703
0.343469
0.373119
0.350453
0.349695
0.330661
0.330091
0.343137
0.402321
0.342509
0.345041
0.344441
0.339748
0.334385
0.339489
0.336211
0.351907
0.369331
0.337451
0.335322
0.345994
0.352384
0.366981
0.347072
0.323877
0.333064
0.336177
0.351961
0.351514
0.368657
0.339722
0.333567
0.342091
0.342273
0.317463
0.357946
0.347342
0.343483
0.328545
0.357416
0.336833
0.335074
0.357147
0.336537
0.326208
0.319992
0.36659
0.339448
0.339506
0.354238
0.344304
0.345501
0.347789
0.347562
0.370234
0.317504
0.334909
0.373113
0.352682
0.353212
0.359444
0.347832
0.331831
0.343552
0.348945
0.339582
0.340667
0.345589
0.327796
0.345943
0.3503
0.333304
0.362707
0.352992
0.354837
0.343232
0.354922
0.362688
0.343006
0.343568
0.330144
0.350874
0.323563
0.341444
0.347353
0.358362
0.329799
0.355142
0.341075
0.337948
0.331525
0.358181
0.353487
0.30986
0.348961
0.344838
0.35462
0.340993
0.342825
0.334813
0.322139
0.353471
0.318942
0.36308
0.357152
0.381407
0.356231
0.335517
0.338464
0.340053
0.350031
0.340285
0.357697
0.356441
0.35257
0.373203
0.346707
0.348097
0.365414
0.335972
0.378542
0.37719
0.333109
0.344184
0.350757
0.345217
0.32767
0.33477
0.585076
0.373755
0.322068
0.385632
0.334296
0.351572
0.354266
0.340645
0.326403
0.35056
0.329303
0.347838
0.3357
0.348365
0.369048
0.35645
0.336496
0.348588
0.336831
0.335165
0.345725
0.336968
0.395712
0.354093
0.348165
0.3578
0.33559
0.343526
0.31988
0.343989
0.327251
0.329689
0.362797
0.334062
0.35818
0.338608
0.359559
0.357132
0.34889
0.381519
0.329923
0.323218
0.359928
0.345021
0.35328
0.337336
0.347153
0.359782
0.342942
0.33144
0.345448
0.38033
0.35289
0.31974
0.327433
0.341079
0.346126
0.344195
0.355495
0.373777
0.331462
0.337535
0.340161
0.326049
0.353502
0.360813
0.37269
0.354344
0.333222
0.35394
0.354842
0.365591
0.337551
0.332312
0.33908
0.328146
0.330927
0.344466
0.350168
0.3339
0.328672
0.350715
0.33594
0.344225
0.357493
0.357526
0.336496
0.34952
0.316529
0.331088
0.353792
0.340164
0.32759
0.347949
0.352438
0.344615
0.346641
0.338224
0.375937
0.337399
0.330932
0.339522
0.317116
0.36153
0.341074
0.332756
0.337844
0.339311
0.322007
0.364407
0.349177
0.344056
0.337002
0.335481
0.363525
0.34618
0.340622
0.355175
0.341303
0.321189
0.345033
0.358253
0.339838
0.324272
0.336397
0.324997
0.334113
0.312961
0.332489
0.361522
0.340406
0.340612
0.378616
0.355365
0.354383
0.328801
0.339981
0.338617
0.376212
0.342677
0.346582
0.363718
0.33645
0.341449
0.348106
0.341913
0.343262
0.322697
0.317427
0.336092
0.335629
0.359462
0.348312
0.390345
0.34877
0.365073
0.330316
0.38207
0.351432
0.367343
0.368143
0.380164
0.359711
0.337402
0.346597
0.417444
0.359934
0.338868
0.320825
0.37333
0.346019
0.347605
0.347854
0.343083
0.360532
0.359119
[truncated: 6 more rows]

[truncated: 18 more sheets: One sim - SD mem vel, One sim - Time(s) - Mem vel, One sim - Mean mem pos, One sim - SD mem pos, One sim - Time(s) - Mem pos, 1cell acorr - Time lag (ms), 1cell acorr - Wavemodes, 1cell acorr - Freq (per nm), 1cell acorr - Amp (nm^3), 1cell acorr - Fit Pre (nm^3), 1cell acorr - Fit Rate (per ms), All acorr - Freq (per um), All acorr - Med amp (nm^3), All acorr - SE amp (nm^3), All acorr - SD amp (nm^3), All acorr - Med rate (per ms), All acorr - SE rate (per ms, All acorr - SD rate (per ms)]
