# Supplementary material for: Leading edge maintenance in migrating cells is an emergent property of branched actin network growth
Source: eLife journal article supplement (doi:10.7554/elife.74389), 2022-03-10
Supplement: fig3-data1 [file Figure 3-Source Data 1_ExpData.xlsx]

## Sheet: All acorr - Condition name
DMSO vehicle control	30nM LatB

## Sheet: All acorr - Freq (per um)
0.0920243	0.0920243
0.184049	0.184049
0.276073	0.276073
0.368097	0.368097
0.460121	0.460121
0.552146	0.552146
0.64417	0.64417
0.736194	0.736194
0.828218	0.828218
0.920243	0.920243
1.01227	1.01227
1.10429	1.10429
1.19632	1.19632
1.28834	1.28834
1.38036	1.38036
1.47239	1.47239
1.56441	1.56441
1.65644	1.65644
1.74846	1.74846
1.84049	1.84049
1.93251	1.93251
2.02453	2.02453
2.11656	2.11656
2.20858	2.20858
2.30061	2.30061
2.39263	2.39263
2.48465	2.48465
2.57668	2.57668
2.6687	2.6687
2.76073	2.76073
2.85275	2.85275
2.94478	2.94478
3.0368	3.0368
3.12882	3.12882
3.22085	3.22085
3.31287	3.31287
3.4049	3.4049
3.49692	3.49692
3.58895	3.58895
3.68097	3.68097
3.77299	3.77299
3.86502	3.86502
3.95704	3.95704
4.04907	4.04907
4.14109	4.14109
4.23312	4.23312
4.32514	4.32514
4.41716	4.41716
4.50919	4.50919
4.60121	4.60121
4.69324	4.69324
4.78526	4.78526
4.87729	4.87729
4.96931	4.96931
5.06133	5.06133

## Sheet: All acorr - Med amp (nm^3)
3.11252e+06	5.90311e+06
3.43138e+06	8.35839e+06
3.35931e+06	7.01796e+06
1.98772e+06	3.72793e+06
1.13333e+06	1.77204e+06
851286	1.10989e+06
661577	788742
482248	555191
392535	427623
296109	314472
243763	263085
194505	221882
158938	171214
128160	123742
105889	102722
94105.3	78581.1
73908.5	66193.8
72010.2	50801.9
50757.1	44115.1
45504.7	42224.3
46030	31688
32037.6	29266.2
25090.1	24429.6
30085.2	21998.5
25864.6	22697.8
25381.9	17314.6
23055.5	17864.6
14121.2	14371.6
21325.9	14319.7
19004.5	12559.3
19249.7	14020.5
15731.8	14421.7
17760.3	12355.8
14497.3	10955.1
15426	9348.66
12986	11835.1
13612.1	12411.6
12259.3	9321.43
13495.2	9276.55
14145.3	7850.48
11426.4	9094.68
12419.1	7762.76
15543.1	6848.86
13070.5	9307.77
11539.7	6485.13
9534.94	6950.9
11434.2	6999.19
12158.7	7005
11575.8	5226.57
10067.3	7103.88
14403.3	5927.46
13656.8	6909.2
9224.75	6477.98
14348.8	6776.37
10545.9	7040.14

## Sheet: All acorr - SE amp (nm^3)
245964	536022
320894	837623
230375	521782
137900	238486
68334	154531
51764.1	94015.6
46689.9	80603.9
34518.2	57590
25355.4	28841.7
23874.2	26116.6
17688	19166.6
15157.8	17994.5
10240.3	12810.6
10828.5	10724.2
11936.9	7784.22
7225.42	6285.07
6783.4	5783.75
7387.71	5633.1
5371.45	4517.73
4893.83	3296.93
4311.35	3248.23
3216.7	2566.9
1956.3	2667.48
3542.26	2348.66
3981.04	2199.17
2863.97	2272.69
3628.37	1414.53
2386.99	1301.24
2558.25	1290.44
2636.08	1724.93
3403.66	1372.98
2031.09	1371.12
2215.96	1011.41
1666.89	1004.52
1787.81	845.234
1749.28	1236.31
1138.31	1171.48
1583.98	1147.15
1646.08	987.571
1755.56	790.21
2358.26	698.131
2787.1	943.799
1982.27	726.745
1770.06	561.899
1178.23	788.7
918.248	796.006
1692.26	592.868
1274.97	694.478
2098.26	488.877
1240.48	1047.77
1968.42	524.161
2194.67	763.756
1132.27	777.932
1948.84	892.967
2492.96	777.557

## Sheet: All acorr - SD amp (nm^3)
1.63154e+06	2.88657e+06
2.24625e+06	4.66369e+06
1.66126e+06	2.99741e+06
1.01335e+06	1.23921e+06
483194	860390
351081	497484
320090	455965
244081	325778
188041	160584
167120	143047
127550	106715
101682	98559.9
70947	70166.6
67624.2	60665.1
80075.3	44034.2
49005.2	34424.8
47483.8	31146.4
49004.5	28165.5
35630.2	24744.6
32091	18356.5
27940.8	17188
19566.4	14291.9
11066.5	14364.8
20956.3	13076.8
19503	11636.9
16452.3	11363.5
17775.3	7617.45
13290.2	6885.49
15770.1	6949.26
13441.4	8272.49
16674.5	6864.89
10553.9	6991.37
11079.8	4743.95
8334.45	5022.59
8758.45	4391.96
7421.57	6303.98
5090.69	5368.38
7083.76	5130.22
7175.08	4838.09
8234.3	3871.22
11309.8	3559.79
13653.9	4526.3
8173.1	3633.73
7298.13	2635.54
5399.31	3863.82
4207.94	3377.17
7376.4	3080.63
5256.86	2863.41
9615.42	2240.32
4804.35	4685.77
9643.25	2284.77
7912.98	3741.62
5063.66	3390.93
8494.8	3993.47
7478.89	1555.11

## Sheet: All acorr - Med rate (per ms)
0.000165248	0.0025205
0.000200091	0.00230128
0.00010641	0.00200652
0.000160729	5.99051e-05
0.000254346	0.000134371
0.000288546	0.000230832
0.000420877	0.000234704
0.000595556	0.00037903
0.000738537	0.000613186
0.000633678	0.000823368
0.000634549	0.000662325
0.000748406	0.000861501
0.00103879	0.00099115
0.00345061	0.000873614
0.00212952	0.000518586
0.00169432	0.000793958
0.00130366	0.00119751
0.0030499	0.00347594
0.0011629	0.00542094
0.000447451	0.000770945
0.00564706	0.000274531
0.00436936	0.00208404
0.00255646	0.00112048
0.000241872	0.00135601
0.00026603	0.000159265
0.000581885	0.000694483
0.00290965	0.00151156
0.000152722	0.0107651
0.00193844	0.00323946
0.000847357	0.000658308
0.000206032	0.0012724
	0.000605044

## Sheet: All acorr - SE rate (per ms
1.59764e-05	1.08403e-05
1.55808e-05	9.90816e-06
1.59654e-05	3.80953e-05
1.86592e-05	0.000110657
2.09856e-05	0.000113253
3.7948e-05	0.00012404
3.18955e-05	0.000103279
3.94754e-05	0.000128301
5.01295e-05	9.62062e-05
5.67127e-05	0.00013688
6.41105e-05	0.000106737
8.1238e-05	0.000119821
7.4936e-05	0.000198998
6.58951e-05	0.000239031
0.000131821	0.00015094
0.000130467	0.000175316
0.000108142	0.00017706
0.00017121	0.000211995
0.00015714	0.00014592
0.000234455	0.000221908
0.000150931	0.000158761
0.000343558	0.000203286
0.000273144	0.000310204
0.000299434	0.000163626
0.000471678	0.000186094
0.000306839	0.000127553
0.000305208	0.000313162
0.000321921	0.000160781
0.00036195	0.000304905
0.000304473	0.000249659
0.000205379	0.000231555

## Sheet: All acorr - SD rate (per ms)
0.000108357	6.03561e-05
0.000109066	5.69181e-05
0.00011623	0.000215499
0.00013194	0.000616113
0.000152777	0.000599276
0.000262912	0.000607669
0.000209153	0.000575031
0.000273494	0.000690922
0.000378469	0.000499902
0.000388803	0.000684398
0.000466732	0.000522902
0.00055694	0.000610971
0.000502686	0.000954362
0.000411515	0.00119515
0.000894052	0.000798697
0.000922539	0.000858871
0.00068395	0.000830487
0.00113568	0.00103856
0.00103043	0.000729598
0.00153742	0.00113151
0.000867034	0.00076139
0.00185012	0.0010563
0.0014193	0.00151968
0.0016125	0.000818131
0.00235839	0.000789532
0.00147155	0.000637764
0.00158591	0.0014005
0.00132732	0.000754131
0.00165866	0.00136357
0.00129177	0.00122307
0.000821515	0.000926221
