# Supplementary material for: Leading edge maintenance in migrating cells is an emergent property of branched actin network growth
Source: eLife journal article supplement (doi:10.7554/elife.74389), 2022-03-10
Supplement: fig3-data1 [file Figure 3-Source Data 2_SimData.xlsx]

## Sheet: All acorr - Condition name
M = 15.0	M = 10.0

## Sheet: All acorr - Freq (per um)
0.05	0.05
0.1	0.1
0.15	0.15
0.2	0.2
0.25	0.25
0.3	0.3
0.35	0.35
0.4	0.4
0.45	0.45
0.5	0.5
0.55	0.55
0.6	0.6
0.65	0.65
0.7	0.7
0.75	0.75
0.8	0.8
0.85	0.85
0.9	0.9
0.95	0.95
1	1
1.05	1.05
1.1	1.1
1.15	1.15
1.2	1.2
1.25	1.25
1.3	1.3
1.35	1.35
1.4	1.4
1.45	1.45
1.5	1.5
1.55	1.55
1.6	1.6
1.65	1.65
1.7	1.7
1.75	1.75
1.8	1.8
1.85	1.85
1.9	1.9
1.95	1.95
2	2
2.05	2.05
2.1	2.1
2.15	2.15
2.2	2.2
2.25	2.25
2.3	2.3
2.35	2.35
2.4	2.4
2.45	2.45
2.5	2.5
2.55	2.55
2.6	2.6
2.65	2.65
2.7	2.7
2.75	2.75
2.8	2.8
2.85	2.85
2.9	2.9
2.95	2.95
3	3
3.05	3.05
3.1	3.1
3.15	3.15
3.2	3.2
3.25	3.25

## Sheet: All acorr - Med amp (nm^3)
4.20018e+06	5.81777e+06
2.49041e+06	6.95006e+06
2.06926e+06	7.16959e+06
1.98227e+06	5.05672e+06
1.48258e+06	4.06575e+06
868627	3.21232e+06
778752	2.05037e+06
549481	1.47477e+06
480658	1.26366e+06
406845	1.05999e+06
269996	939235
227865	630104
188280	461733
147666	353347
118976	303377
94240.5	221877
74122.2	169675
64508.8	144808
53998.8	98604.4
43813.9	84905.4
36326.9	67368.9
30791.8	53385.7
26167.3	41067.3
21952.5	36244
18363	28961.6
15463.4	23112.3
13235.8	18664.6
11293.7	14649.6
9614.37	12013.5
8442.4	10153.6
7066.3	9102.35
5753.79	7568.18
5007.83	5863.9
4436.75	5297.69
3807.51	4525.32
3340.52	3815.52
2745.21	3178.71
2433	2703.06
2081.48	2338
1917.15	2008.98
1621.01	1681.86
1406.71	1454.61
1239.6	1269.04
1102.81	1095.07
955.593	986.675
851.524	863.966
750.542	744.783
681.249	658.421
579.411	593.807
521.484	522.23
472.104	461.538
421.087	403.007
373.743	368.518
343.328	330.278
308.75	293.875
279.808	269.721
254.014	233.348
221.708	217.369
204.658	193.943
188.973	177.806
169.809	162.528
157.007	150.165
141.305	134.882
132.095	122.385
121.703	111.26

## Sheet: All acorr - SE amp (nm^3)
544681	482697
380919	1.10544e+06
178367	828105
198967	496219
140260	311472
66561.4	280828
47454.8	164810
28692.7	102557
25607.5	71080.9
19201.1	60127.9
12314.8	42814
12467.3	25031.1
7840.56	19430.1
2931.94	13089.2
3251.01	11321.6
3179.84	7851.07
2152.61	6946.36
2111.66	4819.16
1757.62	3992.67
982.213	2190.66
767.715	2055.92
649.298	1929.93
746.021	1100.3
444.819	882.434
422.844	749.999
364.618	507.516
251.382	432.448
269.15	304.672
168.025	245.005
149.299	225.745
115.488	191.692
109.051	148.495
96.1252	126.853
64.8675	94.774
49.4542	87.2637
49.875	54.3279
35.6271	47.9007
32.6316	46.0601
27.4398	33.051
30.195	24.9118
15.6462	21.706
16.7028	19.2403
13.339	11.6332
13.0602	14.5612
11.0908	11.7258
9.11513	9.28761
5.29043	8.36849
6.48319	8.22884
5.70366	6.03134
6.26282	6.37771
4.52225	4.94154
3.65977	3.76956
3.2501	3.97318
3.45866	3.68603
2.93076	3.17452
2.35537	2.37288
1.88801	2.53464
2.10695	1.86657
1.58801	1.56007
1.8073	1.57254
1.3862	1.4215
1.17968	1.31673
0.825595	1.23629
1.06187	0.85995
0.776083	1.06415

## Sheet: All acorr - SD amp (nm^3)
3.44487e+06	2.93613e+06
2.28551e+06	6.90344e+06
1.08497e+06	5.23739e+06
1.25838e+06	3.09889e+06
875923	1.92004e+06
404877	1.77611e+06
296355	1.0025e+06
179186	623832
161956	443900
121438	380282
76905.9	270780
78850.1	156319
49588.1	122887
17345.6	80687
20040.6	71604
20111.1	48397.3
13093.8	42820.3
13017.1	30479
11116.2	25251.9
6133.92	13504.1
4732.51	12839.2
4106.52	12205.9
4718.25	6958.91
2813.28	5581
2674.3	4683.74
2277.04	3209.81
1569.88	2700.63
1702.25	1926.92
1049.32	1530.05
944.247	1427.74
730.413	1212.36
681.022	939.168
607.949	802.287
405.097	591.863
312.776	551.904
315.437	343.6
225.326	302.95
203.784	291.31
173.545	209.033
190.97	157.556
96.4496	135.554
105.638	121.686
83.3018	72.6496
82.5998	92.0934
70.1447	74.1605
57.6491	58.0011
32.6124	52.927
41.0033	52.0438
36.0731	37.6657
39.6095	40.3362
28.6012	31.253
23.1464	23.5409
20.5554	25.1286
21.8745	23.3125
18.5358	20.0774
14.8967	15.0074
11.9409	16.0305
13.3255	11.8052
10.0434	9.86678
11.4303	9.94562
8.76711	8.87726
7.46095	8.32775
5.08931	7.81898
6.71589	5.4388
4.90838	6.73029

## Sheet: All acorr - Med rate (per ms)
9.79223e-06	9.82355e-06
2.02576e-05	1.28111e-05
3.15667e-05	5.76868e-05
3.37513e-05	5.69548e-06
4.63121e-05	5.81014e-05
6.90259e-05	4.6918e-05
4.59932e-05	5.22686e-06
5.26607e-05	5.69264e-05
4.14846e-05	3.78368e-05
2.81836e-05	6.05876e-05
5.31676e-05	7.50055e-05
8.12365e-05	6.37191e-05
7.87188e-05	6.72594e-05
0.00010576	0.000103437
6.29404e-05	0.000109379
0.000109352	0.000108667
0.000143995	0.000119743
0.00016517	0.000195531
0.000158045	0.000205538
0.000322767	0.000228172
0.000230833	0.000255814
0.000222444	0.000332961
0.000277904	0.00021851
0.00031794	0.00031617
0.000240613	0.000455805
0.000358266	0.000256635
0.000424565	0.000522898
0.000408768	0.000524614
0.000551182	0.000415637
0.000568683	0.000507143
0.000700761	0.000673803
0.000615427	0.000700096
0.000705869	0.000591196
0.000958957	0.00119881
0.00108355	0.000697374
0.00119247	0.000790301
0.000945703	0.000955119
0.00135041	0.00132842
0.00124103	0.0011479
0.00148076	0.00151296
0.0018449	0.00132745
0.00205582	0.00225235
0.00148275	0.0021752
0.00263703	0.00190556
0.00251121	0.00303158
0.00330829	0.00346873
0.00382341	0.00479069
0.00433568	0.00462047
0.0050868	0.00561911
0.00526064	0.00607576
0.00535069	0.00569668
0.00591254	0.00568948
0.00716444	0.00866583
0.00577817	0.00691269
0.0089527	0.00820213
0.0108675	0.00782992
0.00867436	0.0102945
0.0120646	0.0102315
0.0107544	0.0106939
0.0122379	0.0118994
0.0133046	0.0135368
0.0119042	0.0163928
0.0140769	0.0146876
0.0198747	0.0166149
0.018477	0.0184221
0.0189376

## Sheet: All acorr - SE rate (per ms
1.90486e-06	2.16309e-06
2.74259e-06	2.6655e-06
2.2379e-06	2.43206e-06
2.11957e-06	1.9787e-06
2.78283e-06	2.90185e-06
3.26435e-06	3.44212e-06
3.71439e-06	3.37041e-06
2.94536e-06	3.014e-06
3.31604e-06	3.2904e-06
4.47436e-06	3.81137e-06
3.66115e-06	3.67835e-06
5.09453e-06	4.15114e-06
4.87167e-06	4.14562e-06
3.39523e-06	3.96425e-06
4.52248e-06	5.93504e-06
5.33051e-06	6.3952e-06
6.79799e-06	5.0832e-06
8.63955e-06	7.68733e-06
7.96885e-06	6.65238e-06
8.1827e-06	7.68637e-06
7.78939e-06	9.38445e-06
8.01472e-06	8.82364e-06
1.14404e-05	7.37107e-06
7.18186e-06	9.41524e-06
1.07103e-05	9.23961e-06
1.2213e-05	1.26886e-05
1.1023e-05	1.35954e-05
1.54251e-05	1.72335e-05
1.40066e-05	1.53506e-05
1.36262e-05	1.91137e-05
1.44714e-05	1.66894e-05
1.70449e-05	2.70624e-05
1.70683e-05	2.79145e-05
1.99191e-05	2.91543e-05
2.11247e-05	2.22371e-05
2.43809e-05	3.11697e-05
2.8079e-05	3.94812e-05
2.42481e-05	3.9369e-05
3.60766e-05	5.50045e-05
4.08505e-05	7.29483e-05
3.21303e-05	6.01317e-05
4.74328e-05	6.87547e-05
4.20502e-05	9.93663e-05
5.87649e-05	6.99663e-05
6.67592e-05	0.00011175
7.45878e-05	0.00012644
8.03996e-05	0.00013475
6.1704e-05	0.000129304
0.000109219	0.000142228
0.000132918	0.000168087
0.000113223	0.000153307
0.000120945	0.000153463
0.000172493	0.000194512
0.000169685	0.000191205
0.000193779	0.000219232
0.000199841	0.00020952
0.000198951	0.000213971
0.000234011	0.000173459
0.000235699	0.000232171
0.00020029	0.000237639
0.000128099	0.000241792
0.000243632	0.000329442
0.000295579	0.000235462
0.000272422	0.000171948
0.000292343

## Sheet: All acorr - SD rate (per ms)
1.17423e-05	1.35085e-05
1.71275e-05	1.64313e-05
1.39757e-05	1.51882e-05
1.28929e-05	1.21975e-05
1.73788e-05	1.83529e-05
2.06456e-05	2.17699e-05
2.31963e-05	2.13163e-05
1.83938e-05	1.90622e-05
2.07086e-05	2.08103e-05
2.82983e-05	2.41052e-05
2.25688e-05	2.32639e-05
3.22206e-05	2.59239e-05
3.04236e-05	2.62192e-05
2.09296e-05	2.44373e-05
2.78784e-05	3.75365e-05
3.32891e-05	4.04468e-05
4.29943e-05	3.17446e-05
5.46413e-05	4.8619e-05
5.03994e-05	4.20733e-05
5.17519e-05	4.86129e-05
4.92644e-05	5.93525e-05
5.06895e-05	5.58056e-05
7.23552e-05	4.54383e-05
4.54221e-05	5.87981e-05
6.77376e-05	5.84364e-05
7.7242e-05	7.92402e-05
6.97154e-05	8.59846e-05
9.7557e-05	0.000108994
8.74712e-05	9.7086e-05
8.61794e-05	0.000120886
9.15252e-05	0.000105553
0.000107801	0.000169005
0.000105216	0.000176547
0.000124395	0.000182069
0.000133605	0.00014064
0.000154199	0.000194655
0.000177587	0.000249701
0.000153358	0.000242687
0.000228168	0.000347879
0.000255111	0.000461365
0.000200654	0.000375523
0.000299991	0.000434843
0.000255781	0.000628448
0.000371662	0.00043694
0.000422222	0.000706767
0.000471735	0.000799679
0.000508492	0.000852232
0.000380369	0.000817789
0.000690761	0.000899526
0.000840646	0.00106307
0.000707076	0.000969598
0.000755304	0.000970583
0.00109094	0.0012302
0.00107318	0.00120928
0.00121015	0.00138655
0.00126391	0.00132512
0.00125828	0.00135327
0.0014614	0.00109705
0.00149069	0.00146838
0.00123467	0.00150296
0.000746939	0.00152923
0.00154086	0.00208357
0.00186941	0.00148919
0.00172295	0.0010875
0.00184894
