# Supplementary material for: Leading edge maintenance in migrating cells is an emergent property of branched actin network growth
Source: eLife journal article supplement (doi:10.7554/elife.74389), 2022-03-10
Supplement: fig4-data1 [file Figure 4-Source Data 1_MembDecoupleData.xlsx]

## Sheet: All acorr - Condition name
Membrane segment coupling removed	Complete Model

## Sheet: One sim - Mean fil density
0.34	0.34
0.39065	0.38235
0.41835	0.40355
0.40965	0.39525
0.3867	0.3759
0.3592	0.35
0.3344	0.3266
0.3135	0.30385
0.2936	0.28655
0.2796	0.26915
0.2689	0.2549
0.2616	0.25005
0.25555	0.24755
0.2544	0.2476
0.2512	0.255
0.25225	0.2618
0.2559	0.2686
0.26315	0.27595
0.27135	0.28055
0.27855	0.2843
0.2834	0.29205
0.28665	0.2965
0.29225	0.29815
0.2919	0.3024
0.29155	0.30195
0.2952	0.3038
0.29175	0.30505
0.2926	0.30265
0.2917	0.30245
0.2928	0.3017
0.294	0.3031
0.29465	0.3049
0.29425	0.30775
0.29345	0.3099
0.29015	0.30645
0.2897	0.3098
0.2913	0.3109
0.288	0.3091
0.2873	0.3064
0.2889	0.3027
0.2906	0.29835
0.293	0.2921
0.29285	0.2912
0.29475	0.2909
0.2962	0.2882
0.2987	0.28515
0.29875	0.28385
0.29945	0.2857
0.29565	0.2859
0.29725	0.28955
0.295	0.29005
0.29275	0.29405
0.29335	0.29545
0.2937	0.295
0.29085	0.29795
0.28715	0.30005
0.28815	0.30095
0.28485	0.30165
0.28665	0.2972
0.2884	0.29635
0.2899	0.295
0.2929	0.29705
0.2927	0.29825
0.2951	0.2975
0.29735	0.2971
0.29795	0.29615
0.29545	0.2974
0.2958	0.2942
0.2947	0.2926
0.2953	0.292
0.2925	0.29205
0.2945	0.29545
0.289	0.29755
0.28515	0.30055
0.28485	0.3041
0.28845	0.3024
0.28935	0.3013
0.2899	0.29635
0.2906	0.2918
0.29315	0.2904
0.2934	0.28545
0.29465	0.2823
0.2933	0.28155
0.29365	0.2798
0.2904	0.27715
0.29225	0.2792
0.2917	0.27995
0.29045	0.2803
0.29505	0.28245
0.29465	0.2859
0.29135	0.28985
0.2914	0.29195
0.2874	0.29005
0.2896	0.29045
0.2884	0.2947
0.28825	0.2934
0.28965	0.29365
0.29295	0.292
0.2942	0.295
0.2941	0.293
0.29575	0.29025
0.29355	0.2889
0.29395	0.2868
0.2938	0.2872
0.28975	0.28365
0.291	0.282
0.2888	0.28105
0.29275	0.28235
0.2931	0.2817
0.29375	0.2808
0.2957	0.2771
0.29805	0.27815
0.2981	0.276
0.29515	0.27715
0.29465	0.2766
0.2948	0.27605
0.2904	0.2771
0.2923	0.28055
0.2936	0.2852
0.29365	0.28645
0.2931	0.28765
0.2939	0.28455
0.2943	0.28365
0.2919	0.28175
0.29525	0.28105
0.2967	0.2832
0.2994	0.2822
0.3009	0.2836
0.30235	0.28565
0.3039	0.2872
0.30605	0.2843
0.30655	0.2876
0.30475	0.28865
0.30545	0.28985
0.303	0.28765
0.3034	0.2932
0.3008	0.29615
0.29685	0.29655
0.2934	0.29565
0.2885	0.2937
0.2901	0.29505
0.2967	0.2911
0.29805	0.2888
0.2991	0.2867
0.2984	0.2838
0.3003	0.2842
0.3028	0.28425
0.3029	0.28845
0.30025	0.286
0.2961	0.28345
0.29425	0.2782
0.2934	0.27775
0.2926	0.27585
0.2935	0.2728
0.2962	0.2745
0.29645	0.2767
0.29205	0.27445
0.2933	0.27275
0.2918	0.2695
0.29235	0.27105
0.29275	0.2749
0.29005	0.2785
0.28725	0.27935
0.2904	0.2813
0.29015	0.28595
0.28775	0.28595
0.2933	0.28795
0.2954	0.2907
0.29525	0.291
0.3008	0.28585
0.29815	0.2875
0.2998	0.2863
0.29985	0.2852
0.29995	0.2822
0.3	0.2847
0.29795	0.28715
0.29885	0.28765
0.2986	0.28605
0.2986	0.2886
0.2983	0.28965
0.30075	0.2884
0.29725	0.28925
0.29175	0.29035
0.2909	0.2899
0.2934	0.2894
0.29345	0.28795
0.29325	0.28475
0.292	0.2843
0.29535	0.28675
0.2914	0.28545
0.2908	0.2892
0.28975	0.28745
0.28965	0.2902
0.28875	0.2911
0.2872	0.2891
0.2863	0.28705
0.28695	0.2867
0.28735	0.28575
0.2859	0.28795
0.2866	0.2849
0.2879	0.28595
0.28835	0.28625
0.2901	0.28655
0.2877	0.28675
0.28805	0.29005
0.28945	0.2903
0.28815	0.29055
0.29005	0.2913
0.2858	0.2895
0.2839	0.28635
0.2838	0.284
0.2851	0.28165
0.2797	0.28545
0.27815	0.2853
0.28085	0.2882
0.2798	0.2896
0.27815	0.28965
0.27345	0.2883
0.2716	0.287
0.2702	0.2851
0.2702	0.28345
0.27165	0.2838
0.27425	0.28285
0.27685	0.28165
0.2819	0.27745
0.284	0.2766
0.2869	0.277
0.29105	0.27595
0.29275	0.27645
0.2956	0.27205
0.2968	0.27505
0.29375	0.27495
0.2929	0.28115
0.29415	0.2799
0.29895	0.2807
0.30035	0.282
0.29625	0.28185
0.292	0.2827
0.293	0.28165
0.2931	0.2848
0.29305	0.28135
0.29575	0.28165
0.29675	0.2817
0.2939	0.2814
0.29275	0.284
0.2951	0.2853
0.28795	0.28635
0.28295	0.2853
0.27915	0.2802
0.28135	0.28165
0.28345	0.28025
0.2852	0.27905
0.2888	0.28135
0.2905	0.2805
0.29225	0.2776
0.29345	0.27775
0.2969	0.2763
0.30225	0.27795
0.3039	0.2823
0.30165	0.2826
0.3011	0.28145
0.29825	0.28345
0.3021	0.281
0.30045	0.28445
0.30135	0.2811
0.29465	0.2812
0.28885	0.28285
0.2903	0.28345
0.29045	0.28545
0.2892	0.2881
0.28625	0.2881
0.28645	0.28945
0.2873	0.2868
0.28645	0.2855
0.2877	0.28415
0.2906	0.2832
0.2966	0.281
0.2993	0.28335
0.302	0.2809
0.3016	0.2805
0.29965	0.28165
0.29445	0.282
0.2897	0.2798
0.287	0.2787
0.2859	0.27735
0.28465	0.2814
0.28405	0.2881
0.2824	0.2876
0.2861	0.2899
0.28895	0.2915
0.2899	0.29475
0.2906	0.2949
0.2935	0.29445
0.29545	0.29215
0.2996	0.28965
0.3015	0.29085
0.2984	0.29045
0.2992	0.29195
0.29925	0.2884
0.2959	0.29035
0.29555	0.28845
0.29375	0.28565
0.29175	0.28265
0.2895	0.28465
0.2891	0.28145
0.29225	0.2843
0.29665	0.28385
0.298	0.28165
0.29725	0.27935
0.2968	0.276
0.29635	0.27835
0.2946	0.2751
0.29485	0.2778
0.29185	0.27875
0.29255	0.2788
0.29015	0.2761
0.2899	0.2765
0.2945	0.2815
0.29435	0.28375
0.2966	0.2819
0.29795	0.28095
0.3027	0.28235
0.3059	0.27925
0.30765	0.27895
0.3067	0.28195
0.308	0.28255
0.30805	0.28625
0.30845	0.28915
0.3067	0.2915
0.3072	0.2946
0.3035	0.29725
0.30155	0.2981
0.29625	0.2933
0.2975	0.2882
0.29455	0.28565
0.2938	0.287
0.29035	0.2881
0.291	0.28525
0.29115	0.2861
0.29085	0.2854
0.2922	0.29
0.2917	0.2879
0.2922	0.29065
0.2927	0.29045
0.2946	0.29165
0.29705	0.28975
0.30115	0.28655
0.30475	0.28485
0.3043	0.2808
0.30395	0.27915
0.3041	0.2788
0.30345	0.2786
0.29875	0.27765
0.2964	0.27815
0.2957	0.27985
0.2932	0.2805
0.29125	0.28205
0.29285	0.28265
0.29525	0.2835
0.29495	0.28075
0.29235	0.28515
0.2937	0.28585
0.29245	0.2862
0.2935	0.2882
0.2913	0.2917
0.291	0.28815
0.2907	0.28705
0.2891	0.2901
0.2899	0.2892
0.2914	0.28815
0.28735	0.2923
0.28815	0.29505
0.28795	0.2958
0.2922	0.2931
0.2961	0.2968
0.29855	0.29295
0.29855	0.29185
0.301	0.28545
0.29995	0.2838
0.298	0.28335
0.29795	0.28275
0.29775	0.27795
0.29965	0.2759
0.29985	0.27435
0.3004	0.2782
0.3007	0.28025
0.3005	0.2837
0.2986	0.2833
0.29695	0.2824
0.2965	0.28075
0.29595	0.28485
0.2948	0.2857
0.2955	0.29125
0.29235	0.28715
0.292	0.28785
0.2897	0.2868
0.29005	0.2858
0.2884	0.2849
0.287	0.2858
0.29235	0.28225
0.29565	0.28055
0.2949	0.27895
0.29355	0.2786
0.29315	0.2796
0.29345	0.277
0.29355	0.2808
0.2908	0.2812
0.2935	0.2817
0.29115	0.28045
0.2923	0.2782
0.29485	0.27635
0.29295	0.27445
0.29375	0.27455
0.2932	0.27375
0.2903	0.2762
0.28715	0.27245
0.2874	0.2688
0.29125	0.27055
0.2936	0.2714
0.2903	0.27225
0.29125	0.2691
0.29335	0.26735
0.29505	0.2703
0.296	0.27385
0.2946	0.2724
0.29215	0.2725
0.2918	0.2749
0.2936	0.2794
0.29455	0.28015
0.2914	0.28235
0.2924	0.2845
0.29855	0.28715
0.2999	0.2937
0.29955	0.2944
0.29805	0.29495
0.29665	0.29365
0.295	0.2908
0.29205	0.28845
0.2915	0.2881
0.2886	0.28575
0.2868	0.2805
0.28625	0.2797
0.2854	0.2781
0.2831	0.27195
0.28925	0.269
0.2928	0.269
0.29045	0.2708
0.29115	0.2675
0.2927	0.27045
0.2963	0.2736
0.29315	0.27255
0.2929	0.2753
0.29475	0.27655
0.29295	0.275
0.2945	0.2749
0.2926	0.27585
0.29495	0.2738
0.29375	0.27375
0.29505	0.27305
0.2962	0.2754
0.2926	0.28065
0.28995	0.28165
0.2863	0.2844
0.2856	0.28305
0.28615	0.27915
0.2885	0.2819
0.2952	0.2847
0.29465	0.285
0.29895	0.28845
0.2971	0.28685
0.2984	0.28465
0.2992	0.28475
0.2968	0.2862
0.2942	0.2848
0.29355	0.28215
0.29335	0.28165
0.2959	0.28095
0.2999	0.2779
0.29915	0.273
0.3	0.27635
0.29865	0.277
0.3012	0.2724
0.30075	0.27215
0.30145	0.27165
0.30165	0.27
0.29795	0.26705
0.2977	0.26725
0.29465	0.26865
0.2933	0.27065
0.29105	0.2741
0.2913	0.276
0.2927	0.27585
0.29215	0.27925
0.2936	0.28045
0.2902	0.27985
0.29005	0.2796
0.28785	0.2816
0.28745	0.28265
0.2896	0.2861
0.29115	0.2887
0.2912	0.28815
0.2951	0.2908
0.2977	0.29005
0.2985	0.2876
0.3012	0.28855
0.3003	0.2918
0.30285	0.29205
0.30165	0.2933
0.3004	0.2907
0.30345	0.29065
0.30385	0.2932
0.3089	0.29525
0.3109	0.2952
0.3101	0.29425
0.30575	0.29015
0.3089	0.28945
0.305	0.29255
0.30165	0.2918
0.29495	0.28825
0.2921	0.2864
0.2918	0.28575
0.2923	0.28115
0.29275	0.27915
0.2953	0.28185
0.29545	0.28335
0.29945	0.2822
0.30185	0.2843
0.30015	0.28805
0.2997	0.28845
0.3024	0.2862
0.30255	0.2884
0.3039	0.29085
0.30265	0.2936
0.30425	0.2943
0.30355	0.2925
0.3046	0.289
0.29925	0.287
0.29905	0.28735
0.29795	0.288
0.29625	0.2884
0.29515	0.28555
0.29755	0.28695
0.2981	0.28725
0.2978	0.28255
0.30065	0.27795
0.3025	0.27905
0.3006	0.27945
0.3004	0.27895
0.30105	0.27765
0.30045	0.27635
0.30085	0.27945
0.29715	0.28085
0.29685	0.2844
0.30175	0.2871
0.30375	0.28665
0.3086	0.29
0.30785	0.2889
0.31155	0.29215
0.3087	0.2872
0.3133	0.2883
0.31045	0.28415
0.30985	0.28405
0.3065	0.28305
0.3035	0.28235
0.29955	0.2866
0.3035	0.287
0.30065	0.28275
0.3019	0.28295
0.30165	0.28635
0.30245	0.28845
0.3024	0.29165
0.30225	0.2945
0.29965	0.295
0.3011	0.2932
0.30465	0.2932
0.304	0.29535
0.3021	0.2948
0.3	0.2965
0.30005	0.29715
0.30255	0.29465
0.29865	0.2945
0.30135	0.29735
0.30585	0.29255
0.30715	0.2909
0.3085	0.2908
0.3068	0.29255
0.30575	0.2933
0.30385	0.29525
0.30445	0.29365
0.30395	0.294
0.29945	0.29255
0.29875	0.2927
0.2956	0.2943
0.29305	0.2917
0.2931	0.29435
0.2933	0.29375
0.29405	0.2914
0.29365	0.2889
0.2982	0.2875
0.2998	0.28615
0.2985	0.2837
0.29935	0.28255
0.30045	0.28145
0.2995	0.2805
0.2971	0.28215
0.29555	0.27975
0.29345	0.27635
0.293	0.27655
0.2893	0.2788
0.2903	0.27955
0.29255	0.28115
0.2943	0.2833
0.2984	0.2852
0.29865	0.2878
0.2943	0.28425
0.2917	0.28485
0.29485	0.2858
0.2931	0.28675
0.2916	0.28875
0.29605	0.2903
0.29375	0.29175
0.29145	0.2942
0.28965	0.29755
0.2912	0.2991
0.28755	0.2997
0.2892	0.3041
0.29115	0.3051
0.2928	0.30175
0.291	0.3041
0.2897	0.3021
0.28685	0.3003
0.2919	0.29745
0.2966	0.2999
0.3018	0.29665
0.3016	0.29385
0.29725	0.29025
0.2968	0.2865
0.2993	0.2853
0.30155	0.28605
0.30075	0.2847
0.3014	0.2871
0.2998	0.287
0.2961	0.28945
0.2928	0.29135
0.29275	0.29445
0.2907	0.2919
0.2915	0.28945
0.2944	0.28715
0.2992	0.28395
0.30455	0.28245
0.30465	0.2873
0.3053	0.28925
0.3035	0.2901
0.3023	0.29575
0.299	0.29885
0.29675	0.29565
0.29865	0.2959
0.29765	0.29905
0.2974	0.29675
0.29945	0.29595
0.2992	0.2935
0.2987	0.2961
0.3008	0.2967
0.3025	0.2959
0.30325	0.2953
0.30255	0.2943
0.2989	0.2968
0.297	0.2968
0.29605	0.2976
0.29835	0.2927
0.3016	0.2902
0.30445	0.2877
0.30525	0.2856
0.30785	0.28275
0.3106	0.2856
0.31095	0.2877
0.3135	0.2909
0.31825	0.29165
0.31185	0.29355
0.3096	0.2958
0.3074	0.29405
0.30595	0.2939
0.30335	0.2911
0.2985	0.29365
0.29835	0.29025
0.2998	0.29405
0.29585	0.29715
0.30005	0.298
0.30245	0.2971
0.30455	0.29705
0.3056	0.30065
0.30535	0.30205
0.30285	0.3011
0.29875	0.30045
0.2988	0.3028
0.29675	0.3027
0.295	0.3015
0.2999	0.29465
0.3003	0.29085
0.30735	0.29125
0.30235	0.2912
0.3031	0.29255
0.3049	0.29025
0.30335	0.28905
0.3013	0.28585
0.3026	0.28475
0.30245	0.283
0.30235	0.27865
0.3003	0.2792
0.297	0.2799
0.29915	0.28015
0.29865	0.28105
0.3006	0.28245
0.29785	0.28175
0.29625	0.28325
0.2964	0.2826
0.29215	0.28395
0.29135	0.28605
0.29295	0.2879
0.2953	0.2874
0.2958	0.2843
0.29405	0.28265
0.297	0.27945
0.29325	0.27725
0.2952	0.279
0.29685	0.2764
0.29945	0.2721
0.29755	0.27025
0.2972	0.26935
0.2988	0.2716
0.3013	0.26955
0.2981	0.2702
0.2988	0.2747
0.3005	0.2767
0.2986	0.2822
0.29975	0.28695
0.30165	0.28685
0.30305	0.2843
0.3077	0.285
0.30935	0.2824
0.3127	0.2823
0.3136	0.28195
0.31535	0.2845
0.31555	0.28275
0.3141	0.28095
0.31255	0.2816
0.3124	0.2804
0.31325	0.2806
0.3131	0.2832
0.3111	0.28425
0.31285	0.28395
0.3151	0.2835
0.3089	0.28295
0.3092	0.28055
0.3069	0.27885
0.3032	0.2779
0.3036	0.279
0.30585	0.2824
0.3088	0.2802
0.3092	0.28165
0.3089	0.2846
0.3062	0.28145
0.3075	0.28475
0.3035	0.2856
0.29975	0.2873
0.2996	0.28665
0.3007	0.28855
0.2982	0.2894
0.2952	0.29155
0.29885	0.29305
0.29645	0.29085
0.2985	0.29145
0.29555	0.2885
0.2936	0.2904
0.29335	0.29045
0.2964	0.28705
0.3013	0.28245
0.3031	0.28435
0.3034	0.28605
0.3028	0.2841
0.2994	0.28635
0.2995	0.28805
0.29865	0.2889
0.3019	0.2891
0.3002	0.2925
0.30265	0.28935
0.30735	0.2873
0.3075	0.2918
0.3107	0.2909
0.3088	0.2917
0.3123	0.2886
0.31025	0.2858
0.3104	0.28565
0.3073	0.2841
0.3061	0.288
0.30115	0.2901
0.2992	0.2915
0.29895	0.2881
0.29915	0.2867
0.2985	0.28315
0.29605	0.27815
0.29655	0.27255
0.302	0.2758
0.30465	0.27665
0.30775	0.2775
0.31075	0.27505
0.3112	0.2773
0.3112	0.28005
0.31125	0.28205
0.31165	0.28355
0.3086	0.2851
0.31	0.28545
0.30735	0.28545
0.30375	0.2867
0.2993	0.29045
0.3007	0.29315
0.3001	0.2938
0.301	0.2962
0.2981	0.2986
0.29665	0.29815
0.2944	0.29575
0.294	0.29855
0.29295	0.29395
0.28905	0.2896
0.28645	0.2853
0.2871	0.28575
0.2836	0.2838
0.28435	0.28375
0.285	0.28195
0.28495	0.28445
0.2843	0.28625
0.2832	0.2909
0.2836	0.2904
0.2846	0.28945
0.29	0.2926
0.28955	0.2903
0.2936	0.29215
0.29325	0.292
0.29695	0.29035
0.2948	0.2934
0.2911	0.2964
0.293	0.2968
0.29655	0.29745
0.29755	0.29675
0.2957	0.29145
0.29495	0.29285
0.2935	0.2919
0.2926	0.29135
0.28595	0.29085
0.28545	0.28825
0.28595	0.28835
0.2894	0.2935
0.29365	0.2925
0.29605	0.29295
0.2976	0.29175
0.29625	0.28945
0.2981	0.2912
0.29155	0.2948
0.29025	0.2982
0.28965	0.29515
0.28595	0.2921
0.2862	0.2938
0.2865	0.2935
0.28535	0.2904
0.2883	0.29165
0.2898	0.29
0.2934	0.28885
0.29155	0.2905
0.29285	0.2956
0.29055	0.29665
0.28785	0.29925
0.28735	0.29845
0.2848	0.29695
0.28315	0.29385
0.2855	0.29545
0.2904	0.2948
0.29525	0.29445
0.29535	0.29205
0.296	0.2915
0.29035	0.2919
0.28905	0.2923
0.28805	0.29495
0.28925	0.2947
0.28945	0.2937
0.28775	0.29465
0.2874	0.295
0.2886	0.29555
0.28915	0.2912
0.28955	0.29315
0.29105	0.2952
0.2872	0.2931
0.2895	0.2921
0.29285	0.2901
0.29515	0.2873
0.29595	0.28605
0.2939	0.2887
0.29045	0.293
0.2911	0.2907
0.28915	0.2923
0.2915	0.29595
0.29235	0.29635
0.293	0.29505
0.29085	0.29485
0.2896	0.29395
0.28925	0.2911
0.29045	0.2924
0.29335	0.28995
0.2962	0.28745
0.2946	0.28565
0.29575	0.2829
0.2932	0.2847
0.2939	0.28805
0.29575	0.28755
0.29715	0.28975
0.3004	0.28995
0.3002	0.292
0.29845	0.29735
0.2955	0.29705
0.29415	0.29475
0.28915	0.29255
0.29265	0.28915
0.2941	0.2865
0.2921	0.28465
0.29315	0.2819
0.2982	0.2776
0.30345	0.27975
0.3065	0.2824
0.30475	0.28315
0.30505	0.2866
0.3045	0.28555
0.3035	0.2839
0.30325	0.2851
0.30315	0.2848
0.3015	0.28735
0.30255	0.2881
0.306	0.286
0.30845	0.2852
0.30665	0.2897
0.30655	0.293
0.30595	0.2949
0.3048	0.2975
0.30005	0.29805
0.3004	0.29715
0.2995	0.2972
0.29465	0.29845
0.2927	0.2989
0.28955	0.2951
0.28905	0.2951
0.28575	0.29475
0.2882	0.2935
0.29475	0.29275
0.29665	0.29485
0.29635	0.30025
0.29625	0.2971
0.2971	0.29705
0.2958	0.2936
0.29295	0.289
0.2958	0.28565
0.3003	0.28285
0.2983	0.28265
0.2984	0.28455
0.2993	0.28325
0.2992	0.2816
0.2965	0.2846
0.29485	0.2824
0.29675	0.2827
0.30025	0.28215
0.3023	0.28135
0.3015	0.2854
0.30025	0.2837
0.29905	0.29045
0.2942	0.294
0.29375	0.29715
0.29295	0.2988
0.29295	0.3008
0.292	0.29965
0.29475	0.30065
0.2959	0.3014
0.2967	0.29865
0.2993	0.29415
0.29765	0.2917
0.2935	0.2874
0.2912	0.2873
0.2908	0.28885
0.29175	0.2862
0.2957	0.28325
0.2935	0.28075
0.29655	0.2794
0.29505	0.2757
0.2943	0.27605
0.29345	0.27935
0.29225	0.28365
0.2943	0.28695
0.2979	0.2867
0.30205	0.28895
0.3024	0.28885
0.3002	0.2912
0.2994	0.2959
0.29825	0.29715
0.29985	0.2933
0.29865	0.29115
0.3004	0.2893
0.3016	0.28815
0.3034	0.285
0.2994	0.29065
0.2949	0.29215
0.29275	0.29285
0.28955	0.29515
0.2869	0.2951
0.2891	0.2963
0.2877	0.29675
0.28445	0.29595
0.28565	0.29455
0.2872	0.29635
0.28435	0.3
0.28235	0.30005
0.27995	0.2993
0.2787	0.3041
0.2818	0.30305
0.2851	0.3065
0.2841	0.3024
0.2832	0.30035
0.2837	0.2945
0.28415	0.29425
0.28665	0.2918
0.2863	0.29065
0.28625	0.28885
0.2891	0.29115
0.28645	0.2907
0.28805	0.28865
0.28865	0.29025
0.28745	0.29355
0.28975	0.2961
0.2922	0.29915
0.29435	0.3036
0.294	0.3033
0.28775	0.3039
0.28665	0.3069
0.28505	0.30995
0.285	0.30975
0.28445	0.3118
0.28065	0.3115
0.2787	0.3113
0.2771	0.3087
0.27745	0.30485
0.27625	0.3024
0.27825	0.29905
0.2821	0.2981
0.28135	0.29905
0.28185	0.29565
0.28245	0.2945
0.2831	0.292
0.2839	0.29155
0.2854	0.29285
0.28895	0.29235
0.291	0.29445
0.29345	0.2966
0.29585	0.29725
0.29535	0.2975
0.29525	0.2955
0.29285	0.29845
0.29265	0.2952
0.29215	0.29845
0.2935	0.2955
0.2928	0.2942
0.28895	0.28955
0.28685	0.2917
0.28435	0.29325
0.2809	0.29275
0.28285	0.2909
0.2841	0.28895
0.28545	0.29175
0.28715	0.2941
0.283	0.29205
0.28745	0.28965
0.28915	0.29015
0.2878	0.28305
0.29315	0.28265
0.29215	0.2829
0.29385	0.2817
0.29165	0.28075
0.29085	0.28075
0.28975	0.27955
0.2915	0.28025
0.29085	0.2811
0.29035	0.27695
0.2895	0.278
0.29095	0.27765
0.29235	0.27825
0.2938	0.2805
0.2939	0.28025
0.2925	0.28025
0.28965	0.28385
0.2903	0.2836
0.2922	0.28735
0.29415	0.2864
0.29315	0.2888
0.2943	0.28885
0.29125	0.2914
0.29015	0.29245
0.29105	0.29
0.2879	0.29085
0.2907	0.28955
0.2893	0.2874
0.2872	0.28405
0.2884	0.28495
0.29085	0.28445
0.2889	0.286
0.28895	0.2865
0.28875	0.28695
0.2911	0.28735
0.29355	0.289
0.2959	0.2909
0.297	0.28635
0.29595	0.28415
0.2982	0.28335
0.29565	0.28465
0.2956	0.28245
0.29965	0.28545
0.2986	0.29045
0.2977	0.2942
0.2982	0.2953
0.3003	0.29525
0.29735	0.29885
0.29735	0.3009
0.297	0.29875
0.2936	0.2986
0.29095	0.2967
0.291	0.301
0.2849	0.29525
0.2818	0.2957
0.28795	0.293
0.28835	0.29125
0.29105	0.2887
0.2886	0.2905
0.28815	0.2878
0.2889	0.2908
0.2909	0.29115
0.28665	0.2928
0.2846	0.29615
0.286	0.29755
0.28795	0.29725
0.28335	0.29515
0.28125	0.29395
0.28205	0.2944
0.283	0.29325
0.28815	0.294
0.287	0.2973
0.28865	0.29
0.2913	0.29185
0.29505	0.2926
0.295	0.2987
0.2964	0.30075
0.2968	0.3007
0.2953	0.30155
0.28845	0.3013
0.28755	0.30165
0.28715	0.3019
0.28725	0.30295
0.2873	0.2992
0.28555	0.2995
0.28755	0.3
0.28205	0.29565
0.28465	0.2952
0.28665	0.2934
0.286	0.2894
0.2872	0.28905
0.287	0.28755
0.29075	0.28945
0.29155	0.2896
0.2949	0.2923
0.29675	0.29005
0.2978	0.28985
0.2992	0.29315
0.3007	0.2939
0.3068	0.29445
0.3098	0.2935
0.31025	0.2891
0.3104	0.2855
0.3105	0.28205
0.30755	0.2827
0.30585	0.28295
0.30125	0.27985
0.3033	0.28055
0.3058	0.27645
0.30255	0.274
0.3022	0.27715
0.2992	0.28015
0.2933	0.2809
0.2926	0.27945
0.29475	0.2798
0.29335	0.2787
0.2906	0.27545
0.2913	0.27085
0.295	0.27105
0.29595	0.2697
0.29565	0.27495
0.29885	0.277
0.2965	0.2798
0.2944	0.2776
0.2905	0.2788
0.2878	0.27655
0.28665	0.27555
0.2869	0.2773
0.29345	0.27765
0.29585	0.2763
0.2977	0.2765
0.29895	0.2815
0.3018	0.2848
0.30175	0.28535
0.30195	0.2843
0.2951	0.28915
0.2917	0.2956
0.29235	0.29915
0.29615	0.29935
0.2947	0.29645
0.29575	0.29535
0.29315	0.2937
0.2955	0.2962
0.29385	0.29575
0.29575	0.2923
0.2926	0.29475
0.28925	0.29665
0.2915	0.29665
0.29335	0.2949
0.2957	0.2946
0.29565	0.293
0.2988	0.288
0.3006	0.28795
0.3042	0.28975
0.30365	0.2925
0.3009	0.2918
0.29705	0.2962
0.29605	0.29715
0.2979	0.2979
0.2996	0.2942
0.3021	0.29345
0.3043	0.29045
0.30185	0.28975
0.30295	0.28575
0.306	0.28735
0.3023	0.2817
0.3026	0.27775
0.29955	0.27605
0.29585	0.2727
0.2954	0.27435
0.2916	0.27855
0.2878	0.28075
0.28325	0.28515
0.28195	0.28825
0.28165	0.2883
0.28415	0.28465
0.2836	0.2854
0.2838	0.2897
0.2871	0.2851
0.28955	0.28635
0.28685	0.28685
0.28735	0.28625
0.28595	0.28825
0.28515	0.28635
0.2807	0.28665
0.28185	0.28455
0.2826	0.28375
0.28445	0.283
0.28475	0.28445
0.287	0.2876
0.2871	0.2877
0.28935	0.28995
0.2902	0.29065
0.2931	0.2913
0.2945	0.29245
0.29415	0.29475
0.29535	0.29505
0.2951	0.3
0.2948	0.30015
0.2942	0.30035
0.2947	0.29965
0.29495	0.295
0.2971	0.29445
0.2954	0.2942
0.2986	0.29155
0.29885	0.29195
0.29725	0.289
0.29365	0.28895
0.29025	0.2888
0.2886	0.2881
0.28845	0.2874
0.28485	0.2866
0.2862	0.2895
0.2869	0.28645
0.2869	0.2892
0.2857	0.29335
0.2891	0.29405
0.29385	0.2967
0.2981	0.2956
0.2975	0.2965
0.2957	0.29895
0.29365	0.2985
0.29325	0.2956
0.2958	0.294
0.2963	0.2931
0.293	0.2922
0.2947	0.29265
0.29245	0.29045
0.29425	0.28995
0.296	0.2923
0.2914	0.2945
0.2869	0.29555
0.2894	0.29655
0.29035	0.2965
0.2931	0.2946
0.2951	0.29375
0.2917	0.2968
0.29145	0.2951
0.29595	0.29625
0.29725	0.29645
0.2934	0.29565
0.29265	0.2915
0.29285	0.2932
0.29205	0.2931
0.29245	0.29145
0.293	0.2909
0.2939	0.2871
0.28775	0.28645
0.2869	0.28665
0.2886	0.2908
0.29155	0.28915
0.29485	0.2893
0.3003	0.28865
0.3022	0.2894
0.30655	0.2869
0.30135	0.286
0.30425	0.29275
0.304	0.29135
0.304	0.29125
0.30185	0.29115
0.3012	0.2911
0.3043	0.2915
0.3036	0.29505
0.302	0.29655
0.30245	0.2941
0.30085	0.29185
0.2985	0.2935
0.29765	0.29125
0.3016	0.28895
0.3011	0.2903
0.3028	0.28935
0.30545	0.29145
0.30225	0.29295
0.3015	0.2952
0.29945	0.2937
0.295	0.29465
0.29215	0.29825
0.2919	0.2994
0.29905	0.30045
0.30295	0.30045
0.3021	0.29575
0.30305	0.2974
0.30545	0.2949
0.30865	0.29345
0.3063	0.28635
0.30455	0.2885
0.30225	0.2883
0.3017	0.29085
0.29975	0.2897
0.2997	0.2916
0.2968	0.2928
0.29265	0.29345
0.2924	0.29495
0.29135	0.29635
0.2923	0.29325
0.2953	0.2916
0.29515	0.2904
0.29605	0.29135
0.30095	0.29245
0.3028	0.2967
0.30475	0.2945
0.30155	0.296
0.3019	0.29705
0.3045	0.2951
0.30195	0.2945
0.2965	0.2926
0.29045	0.2916
0.2848	0.29165
0.285	0.2894
0.28645	0.2904
0.28425	0.2888
0.28785	0.28325
0.2935	0.28535
0.29625	0.2893
0.29945	0.2872
0.29825	0.28675
0.29675	0.28515
0.29705	0.2865
0.2975	0.28775
0.29665	0.28795
0.29695	0.2879
0.29085	0.28715
0.29405	0.2874
0.2965	0.28715
0.2931	0.2869
0.2887	0.28425
0.28545	0.2843
0.2837	0.2838
0.28335	0.2825
0.2818	0.28265
0.2849	0.2807
0.28715	0.2829
0.2906	0.28435
0.2934	0.2839
0.2919	0.28335
0.29595	0.2831
0.2961	0.2797
0.29805	0.28235
0.29565	0.2841
0.29665	0.2886
0.29825	0.28925
0.29815	0.2883
0.29735	0.2894
0.29695	0.2859
0.2912	0.28565
0.29315	0.28675
0.29225	0.28755
0.28755	0.288
0.28575	0.2888
0.2858	0.29155
0.28655	0.29085
0.2867	0.29355
0.2871	0.2963
0.2856	0.2934
0.28515	0.293
0.2832	0.2951
0.284	0.2953
0.2846	0.29315
0.2824	0.2877
0.2809	0.2837
0.28575	0.28585
0.2849	0.28615
0.28535	0.28645
0.28895	0.2868
0.29325	0.28665
0.29435	0.28335
0.2971	0.284
0.2985	0.28375
0.29575	0.28285
0.2973	0.2797
0.2964	0.2803
0.2969	0.27975
0.29825	0.2795
0.29895	0.281
0.29915	0.27945
0.2986	0.2799
0.29635	0.2821
0.29595	0.2811
0.29525	0.2798
0.29665	0.28315
0.29535	0.2835
0.29725	0.28135
0.29215	0.2802
0.2917	0.28035
0.29215	0.27965
0.2911	0.2778
0.29325	0.2802
0.2958	0.2777
0.29585	0.2779
0.29555	0.2761
0.29465	0.27685
0.29095	0.2785
0.287	0.28235
0.289	0.2838
0.28805	0.286
0.28965	0.2876
0.2916	0.29125
0.2939	0.29495
0.29605	0.29665
0.2983	0.2963
0.29915	0.29685
0.30065	0.29435
0.29725	0.29135
0.2994	0.28915
0.2963	0.29015
0.297	0.2882
0.29685	0.2865
0.2943	0.2861
0.295	0.2867
0.29545	0.2839
0.29505	0.2837
0.297	0.2855
0.29265	0.28375
0.29155	0.28255
0.2945	0.28205
0.29395	0.28045
0.2944	0.2815
0.2946	0.28165
0.3014	0.2808
0.3033	0.2832
0.30405	0.2862
0.31105	0.28945
0.31235	0.2923
0.3118	0.29315
0.31435	0.29675
0.31505	0.2991
0.31235	0.2994
0.30905	0.29735
0.30815	0.2926
0.3072	0.29075
0.30515	0.29015
0.30325	0.28895
0.29965	0.2881
0.2977	0.2834
0.29655	0.28105
0.2934	0.28005
0.29595	0.28365
0.2919	0.2856
0.28785	0.2865
0.2863	0.2848
0.28595	0.2817
0.28535	0.28525
0.2836	0.28745
0.2833	0.28375
0.2882	0.2844
0.29225	0.2863
0.2926	0.2875
0.29355	0.289
0.2933	0.29195
0.29035	0.2949
0.28815	0.29655
0.28595	0.29745
0.2851	0.2949
0.285	0.2943
0.28895	0.2883
0.2856	0.28525
0.2859	0.28235
0.2873	0.2835
0.28925	0.2849
0.2907	0.28725
0.29265	0.28665
0.293	0.2845
0.29085	0.2858
0.29255	0.28575
0.2901	0.28525
0.29055	0.2853
0.29175	0.28605
0.29555	0.2838
0.2915	0.2821
0.28945	0.282
0.2878	0.28595
0.28355	0.28025
0.2853	0.2767
0.2868	0.2795
0.28795	0.27485
0.2862	0.2718
0.2884	0.2721
0.29035	0.27095
0.28985	0.27165
0.29365	0.27435
0.29555	0.27945
0.29405	0.27785
0.29105	0.2787
0.2892	0.282
0.2935	0.28245
0.2993	0.28445
0.3042	0.2835
0.30885	0.2809
0.31205	0.27885
0.31245	0.27855
0.3159	0.27965
0.31755	0.28
0.31345	0.28245
0.31235	0.2849
0.3127	0.28635
0.3065	0.28735
0.306	0.2877
0.3075	0.2864
0.30625	0.2872
0.30745	0.29135
0.3039	0.2908
0.3	0.29255
0.29615	0.2899
0.2974	0.2903
0.2961	0.2901
0.29695	0.28705
0.30015	0.2869
0.29805	0.2879
0.29825	0.28725
0.3	0.2893
0.29915	0.2929
0.29875	0.2973
0.29495	0.2937
0.29225	0.2925
0.2925	0.2922
0.2925	0.2918
0.29485	0.2941
0.29665	0.29425
0.2961	0.2965
0.29825	0.29355
0.3014	0.2938
0.29925	0.29285
0.2993	0.29465
0.2968	0.293
0.2987	0.2946
0.29635	0.2985
0.29855	0.29735
0.29715	0.2951
0.29475	0.2959
0.2966	0.29575
0.2951	0.29415
0.29555	0.2923
0.2963	0.2921
0.2968	0.2956
0.29915	0.2922
0.2995	0.29345
0.2988	0.2925
0.29725	0.29175
0.29365	0.2932
0.29475	0.29145
0.29595	0.29245
0.3032	0.29305
0.3066	0.2898
0.3092	0.28705
0.3071	0.2882
0.3039	0.29245
0.3027	0.29315
0.30355	0.2936
0.30405	0.29285
0.30045	0.29315
0.29665	0.2941
0.29345	0.29485
0.29255	0.29465
0.2906	0.29085
0.29065	0.28865
0.2896	0.2905
0.2884	0.2918
0.29	0.29455
0.2864	0.2945
0.2889	0.29115
0.2906	0.28865
0.29175	0.28775
0.29365	0.2838
0.2929	0.28735
0.2893	0.28495
0.29385	0.28235
0.28935	0.2818
0.2894	0.28295
0.2879	0.28575
0.282	0.28515
0.28235	0.28135
0.28515	0.28145
0.2889	0.2798
0.2895	0.2799
0.292	0.27995
0.2941	0.28725
0.29325	0.28895
0.2946	0.2906
0.29285	0.2903
0.2999	0.29005
0.30075	0.2908
0.3011	0.29195
0.3045	0.29545
0.30285	0.2963
0.302	0.29525
0.3034	0.29295
0.3027	0.29425
0.29665	0.2945
0.2906	0.298
0.28925	0.2972
0.2895	0.29545
0.28605	0.29475
0.2882	0.29315
0.2904	0.28995
0.29175	0.29145
0.29565	0.29555
0.2944	0.2972
0.2949	0.2955
0.2956	0.29695
0.29855	0.2968
0.29555	0.29895
0.29335	0.29645
0.2919	0.2948
0.29365	0.29525
0.29155	0.2909
0.292	0.2875
0.2893	0.2884
0.29085	0.2881
0.29465	0.29045
0.30005	0.28665
0.3025	0.2843
0.3024	0.28125
0.3032	0.2801
0.3024	0.2789
0.30285	0.2749
0.3035	0.2766
0.30475	0.2731
0.30115	0.27195
0.2996	0.2747
0.29615	0.2752
0.29355	0.27465
0.295	0.28005
0.294	0.2802
0.2922	0.2783
0.29395	0.278
0.29535	0.27985
0.29645	0.27525
0.29925	0.27415
0.302	0.2677
0.3014	0.26915
0.3018	0.26905
0.29985	0.26975
0.2988	0.2721
0.3007	0.2738
0.2998	0.27755
0.2969	0.2805
0.3004	0.2795
0.30335	0.28075
0.30335	0.2849
0.30215	0.2886
0.2997	0.28465
0.29645	0.28445
0.2953	0.2855
0.29245	0.2882
0.2924	0.29165
0.29085	0.28845
0.2928	0.29015
0.29355	0.2884
0.29495	0.28505
0.2955	0.2823
0.2952	0.27975
0.29635	0.28215
0.29455	0.28415
0.29645	0.2863
0.29855	0.28465
0.2994	0.2831
0.29675	0.28445
0.2975	0.28645
0.29605	0.29105
0.2958	0.29055
0.29815	0.28745
0.2998	0.28565
0.2984	0.28565
0.3063	0.2875
0.3064	0.2841
0.3028	0.28085
0.3047	0.27925
0.30475	0.27985
0.3027	0.2815
0.29945	0.28335
0.30075	0.2843
0.2985	0.28585
0.3046	0.28825
0.30535	0.2868
0.3107	0.28545
0.31285	0.28455
0.31215	0.28725
0.31305	0.2898
0.30725	0.2898
0.30505	0.29625
0.3019	0.29615
0.3021	0.29605
0.2998	0.29475
0.2954	0.29175
0.29	0.2951
0.28905	0.2972
0.28795	0.29415
0.28615	0.29745
0.2859	0.2975
0.28815	0.2956
0.28815	0.2954
0.28705	0.29465
0.2881	0.29485
0.2897	0.29375
0.2895	0.29635
0.28975	0.2985
0.29105	0.3002
0.2901	0.2968
0.2921	0.29795
0.29345	0.2983
0.29375	0.29715
0.2953	0.2964
0.29605	0.2931
0.294	0.2879
0.29635	0.2862
0.2924	0.2859
0.29405	0.28655
0.294	0.2858
0.2931	0.28345
0.2945	0.2852
0.2958	0.285
0.2964	0.28
0.29555	0.279
0.29845	0.28055
0.29845	0.2818
0.29805	0.27985
0.29995	0.2829
0.29815	0.28235
0.3023	0.28395
0.29985	0.2843
0.29885	0.28585
0.29485	0.2849
0.2955	0.28535
0.29735	0.28545
0.2977	0.28775
0.29455	0.2913
0.29255	0.293
0.29125	0.28675
0.29285	0.28825
0.291	0.29055
0.29315	0.29285
0.2948	0.2925
0.29325	0.29315
0.29145	0.2913
0.29315	0.29365
0.2956	0.2955
0.29525	0.29515
0.2943	0.29885
0.29415	0.30455
0.29805	0.30395
0.29695	0.30275
0.2958	0.3022
0.29115	0.3005
0.2949	0.3035
0.29475	0.3035
0.2927	0.30675
0.29565	0.30205
0.29505	0.299
0.2963	0.2946
0.2983	0.29055
0.29875	0.2878
0.2959	0.28745
0.28965	0.28675
0.2862	0.2834
0.2858	0.282
0.2877	0.28525
0.28945	0.28855
0.29015	0.29285
0.2905	0.2953
0.2868	0.29745
0.28635	0.295
0.28555	0.2918
0.29095	0.2888
0.2908	0.2845
0.2889	0.28465
0.29115	0.2882
0.2886	0.28585
0.28865	0.2824
0.28605	0.28535
0.2837	0.2857
0.2844	0.2932
0.28415	0.2945
0.28715	0.29135
0.2892	0.2916
0.28865	0.2939
0.29095	0.2895
0.29765	0.2928
0.2982	0.2875
0.29885	0.2889
0.29705	0.2931
0.29535	0.2924
0.2948	0.29385
0.2956	0.29475
0.295	0.2912
0.29335	0.2889
0.2877	0.2894
0.28915	0.28655
0.29275	0.2833
0.29535	0.28275
0.296	0.27855
0.29405	0.2748
0.2949	0.2735
0.296	0.27095
0.2937	0.2748
0.2965	0.2742
0.2926	0.27555
0.2914	0.27415
0.2915	0.27305
0.2914	0.27585
0.29365	0.2789
0.2939	0.2814
0.2917	0.2794
0.29175	0.2758
0.2891	0.2765
0.28385	0.27705
0.2835	0.2759
0.28345	0.27935
0.28685	0.282
0.2896	0.27955
0.2974	0.2783
0.3017	0.2795
0.30455	0.2808
0.30165	0.28155
0.3029	0.28235
0.3067	0.2853
0.30275	0.2916
0.30195	0.29235
0.30105	0.29385
0.30225	0.29175
0.30345	0.2918
0.3005	0.29245
0.2998	0.2892
0.29605	0.2903
0.2985	0.2897
0.3011	0.28865
0.30335	0.2903
0.30225	0.2929
0.30045	0.2904
0.29845	0.2901
0.2996	0.2894
0.2972	0.2907
0.29595	0.293
0.29115	0.29045
0.29175	0.2865
0.2937	0.2853
0.2913	0.2854
0.2909	0.2865
0.29025	0.28495
0.2882	0.28635
0.2872	0.28405
0.2869	0.2851
0.2854	0.28555
0.2875	0.2877
0.2888	0.28835
0.291	0.2905
0.2946	0.2914
0.2985	0.28565
0.2994	0.28895
0.3001	0.291
0.29975	0.2924
0.3004	0.29115
0.2956	0.28785
0.29465	0.2855
0.29195	0.2833
0.28705	0.28205
0.2849	0.2847
0.2831	0.28495
0.28805	0.2825
0.28635	0.28245
0.2876	0.2784
0.28955	0.27945
0.29275	0.27805
0.294	0.2779
0.29025	0.27915
0.28965	0.2825
0.2915	0.2808
0.29155	0.2813
0.28985	0.28135
0.29265	0.2807
0.29135	0.2805
0.2885	0.28065
0.2892	0.27735
0.28685	0.2749
0.28545	0.2733
0.2849	0.2747
0.2836	0.27715
0.2842	0.28115
0.2866	0.2846
0.288	0.2855
0.2933	0.28555
0.2936	0.28545
0.29035	0.2882
0.29125	0.2868
0.29175	0.28865
0.2926	0.2888
0.29235	0.28815
0.2919	0.28985
0.2881	0.29215
0.28635	0.28855
0.2827	0.286
0.28195	0.28435
0.28195	0.2859
0.2857	0.2838
0.28815	0.28625
0.2884	0.2821
0.2906	0.2823
0.2921	0.2832
0.289	0.2819
0.28555	0.28125
0.28255	0.2841
0.2819	0.2834
0.28415	0.2833
0.28425	0.28375
0.28565	0.2867
0.2879	0.28935
0.28485	0.2903
0.2878	0.2913
0.28655	0.2923
0.2858	0.2917
0.28835	0.2902
0.2871	0.29005
0.2856	0.2876
0.28425	0.28875
0.28345	0.2889
0.28205	0.29125
0.28275	0.29205
0.2854	0.29165
0.2893	0.2903
0.29305	0.29305
0.295	0.29035
0.29675	0.2862
0.29495	0.29065
0.2948	0.28995
0.2931	0.2931
[truncated: 7 more rows]

## Sheet: One sim - SD fil density
1.11301e-16	1.11301e-16
0.04748	0.0535191
0.0710211	0.0701104
0.070997	0.0697154
0.0716434	0.0726608
0.069603	0.070881
0.0681975	0.0666231
0.060023	0.0655987
0.0601175	0.060663
0.0626134	0.0631722
0.0593159	0.0641449
0.0579763	0.0636771
0.0581256	0.067284
0.060181	0.0672447
0.0587864	0.0719506
0.0590072	0.0754268
0.0617678	0.0801321
0.0658426	0.0835584
0.0688723	0.0827614
0.0715542	0.0811259
0.0702933	0.083059
0.0730201	0.0845428
0.0719676	0.0865885
0.0726345	0.0883019
0.0732731	0.0889
0.0753415	0.0900729
0.073713	0.0937226
0.0738002	0.0917309
0.0721118	0.0889723
0.0758613	0.0941031
0.0746987	0.0957089
0.0761107	0.0996829
0.0807032	0.101637
0.0827699	0.102442
0.0832353	0.0998083
0.0852894	0.0980819
0.0861126	0.0987672
0.0842883	0.0952816
0.0830675	0.0944811
0.083207	0.0957945
0.0846135	0.091001
0.0829906	0.0871929
0.0810445	0.0943508
0.0821014	0.0924278
0.0842797	0.0943785
0.0838179	0.0947781
0.0873734	0.0972211
0.086147	0.0972874
0.0878645	0.0924278
0.0835514	0.0903611
0.0785996	0.0918623
0.0765259	0.0923349
0.0738957	0.0915571
0.0780369	0.0959114
0.0786301	0.0971467
0.080272	0.0995189
0.0761318	0.09571
0.0725139	0.0944584
0.0754769	0.0902935
0.0790105	0.0872654
0.0786634	0.0869587
0.0788777	0.0867955
0.0813066	0.0849087
0.0804509	0.0923602
0.079871	0.0934949
0.0760276	0.0911274
0.072665	0.0925585
0.0720578	0.0931383
0.0757469	0.0929324
0.0772512	0.0943158
0.0795954	0.0944399
0.0799544	0.0943254
0.0804635	0.093677
0.0781056	0.0881935
0.0782084	0.0900764
0.0787598	0.0924064
0.0771937	0.0966437
0.0762961	0.102326
0.0790117	0.0978449
0.0789477	0.0951108
0.0812802	0.0935068
0.0830141	0.0926804
0.0861173	0.091058
0.0866877	0.0875918
0.081295	0.0866772
0.0800655	0.0859786
0.082078	0.0876236
0.0866768	0.0881519
0.0904428	0.0911043
0.0920611	0.0868499
0.0897382	0.0870538
0.0956177	0.0853941
0.0881424	0.0899385
0.0807493	0.0904778
0.0836506	0.0890142
0.0851156	0.090022
0.0920748	0.0884437
0.0949996	0.0869471
0.0920419	0.0890316
0.0921501	0.0841272
0.0872727	0.0826231
0.0866686	0.0783421
0.0815854	0.0811399
0.0849331	0.0856554
0.0870247	0.0829493
0.088749	0.0835217
0.086009	0.0900162
0.0869814	0.0896839
0.0821287	0.0895332
0.0785256	0.0901331
0.0814104	0.0839693
0.0865224	0.0899976
0.0826957	0.0911016
0.0819485	0.0909712
0.081091	0.0945842
0.0796977	0.0970308
0.0815666	0.0983818
0.083285	0.0988232
0.0808251	0.0998036
0.0794907	0.0953328
0.0779408	0.0947092
0.0834964	0.09569
0.0836751	0.0934013
0.0821164	0.0915442
0.0868947	0.0961176
0.0926555	0.0982447
0.0892776	0.102492
0.0867341	0.0994257
0.0861165	0.103256
0.0880885	0.0998852
0.0887031	0.100419
0.0848623	0.099275
0.0820647	0.0971487
0.0785471	0.0991749
0.0829058	0.0969794
0.0822512	0.0967448
0.0811993	0.0993227
0.0799722	0.0977876
0.0846479	0.0914131
0.0827829	0.0951873
0.0810359	0.0993142
0.0786194	0.0973559
0.0760435	0.0943082
0.0774285	0.0852847
0.075378	0.0817679
0.0787969	0.0846177
0.0834926	0.0877493
0.0878989	0.0903488
0.0836326	0.0933842
0.0847449	0.0919995
0.0860725	0.0940478
0.0838726	0.0951879
0.0827495	0.0905942
0.0864821	0.09021
0.091808	0.0953267
0.0926814	0.0929479
0.0916751	0.0895645
0.0910691	0.0899131
0.0880484	0.0873953
0.086134	0.0874737
0.0823153	0.0911015
0.0812806	0.0925233
0.0794765	0.0904321
0.081004	0.089971
0.079252	0.0953022
0.0776957	0.100076
0.0779003	0.101513
0.079381	0.104326
0.0797669	0.102883
0.080472	0.0998858
0.0807756	0.0964691
0.0836658	0.0939598
0.0838129	0.0950216
0.0811073	0.0925852
0.0844729	0.0932221
0.0798384	0.0969711
0.0771553	0.090426
0.0765069	0.0910348
0.0766971	0.0869358
0.0807323	0.0875655
0.075694	0.0857626
0.0757139	0.090114
0.0709125	0.0920366
0.0690655	0.0896671
0.0697911	0.0916495
0.0761353	0.0951555
0.0763484	0.0974547
0.0794896	0.098458
0.0841862	0.0960367
0.078957	0.0937858
0.0777663	0.0939173
0.076187	0.0958799
0.0814157	0.0942996
0.0853779	0.0949149
0.0867107	0.0922918
0.0883308	0.0950789
0.0802396	0.0991527
0.0765557	0.100278
0.0798755	0.0986812
0.0775338	0.0953016
0.077729	0.0964709
0.0748719	0.0968158
0.0750343	0.097998
0.0751194	0.0967717
0.0787445	0.0963218
0.0840985	0.0970619
0.0875121	0.105384
0.0887688	0.104156
0.0858967	0.105286
0.0816648	0.10604
0.0805356	0.102325
0.0805321	0.101069
0.0799429	0.103029
0.079148	0.102319
0.0773219	0.101247
0.0799118	0.0991919
0.0752822	0.0936227
0.0753724	0.091427
0.0758698	0.0898855
0.0761113	0.089364
0.0779058	0.0926852
0.0783484	0.0944306
0.0783911	0.0895571
0.0790431	0.0900518
0.081859	0.0878441
0.086373	0.0868918
0.0840578	0.0896167
0.0828233	0.089004
0.0858943	0.0959789
0.0916166	0.0924067
0.0941226	0.0989543
0.094531	0.100371
0.0924898	0.100712
0.0926293	0.0931093
0.0930143	0.0958931
0.0876229	0.099066
0.0819758	0.101169
0.0811475	0.0962081
0.0840615	0.0946126
0.080964	0.0956856
0.0841702	0.0956526
0.0892089	0.097732
0.0901642	0.0964501
0.0863718	0.0947254
0.0830991	0.0967461
0.0828815	0.0971395
0.0815016	0.0959804
0.0831225	0.0936792
0.0825947	0.0936204
0.0823687	0.0945647
0.0832179	0.0867239
0.0845143	0.0839155
0.0898942	0.0835859
0.0920823	0.086121
0.0932034	0.0895732
0.0942604	0.0904508
0.0921021	0.0892082
0.0920969	0.0882852
0.0907633	0.0893849
0.0907577	0.0893204
0.0877169	0.100082
0.0861192	0.101865
0.0865508	0.101288
0.0914061	0.095763
0.0919071	0.0884017
0.0867497	0.093806
0.0828159	0.0923092
0.0821808	0.0921469
0.0850321	0.0928705
0.0848431	0.0952457
0.0818286	0.0930844
0.0774201	0.091455
0.0780266	0.0939676
0.0749264	0.0953636
0.0745082	0.0927648
0.0801546	0.0980245
0.0823733	0.100801
0.0832355	0.10614
0.0835759	0.101779
0.0840043	0.0998177
0.0838063	0.101565
0.0801424	0.0998994
0.0792611	0.104376
0.0735462	0.103615
0.073102	0.104379
0.0759852	0.105635
0.0795281	0.10433
0.0773314	0.103624
0.0813071	0.101239
0.0808336	0.102574
0.0777704	0.0985469
0.0767927	0.0978101
0.0778786	0.101831
0.0773285	0.10226
0.0780403	0.100748
0.0852943	0.0955638
0.0831868	0.096232
0.0779857	0.0999231
0.0799179	0.0995944
0.0834687	0.105784
0.0862024	0.102423
0.0864047	0.101835
0.0889833	0.0995693
0.0849638	0.0979225
0.0858958	0.0972971
0.0854632	0.0982843
0.0843972	0.0913587
0.0828936	0.0908573
0.0827173	0.087115
0.0793679	0.0842585
0.0797936	0.0895313
0.0784257	0.0901701
0.0820772	0.0902045
0.0780161	0.0892793
0.075986	0.0875264
0.0795368	0.0863427
0.0740636	0.0851587
0.0794121	0.0857937
0.0809651	0.0919987
0.0823123	0.0908054
0.0825309	0.0916658
0.0788849	0.0936205
0.0873173	0.0907475
0.0882036	0.0904728
0.0922424	0.0933933
0.0934541	0.0983992
0.0851289	0.0969818
0.0778679	0.0942614
0.0789256	0.0932428
0.0804083	0.0953008
0.0812945	0.0989743
0.0778227	0.103678
0.0754846	0.0972595
0.0756064	0.0971439
0.0757064	0.0941589
0.0789285	0.0973777
0.0827139	0.100493
0.0851543	0.0984091
0.0828826	0.0985003
0.080867	0.095058
0.0787985	0.0955334
0.0804954	0.0955365
0.0819312	0.101249
0.0836522	0.0995028
0.0872635	0.0980297
0.0866507	0.0940247
0.0894325	0.0888486
0.0929632	0.0874483
0.0913798	0.088069
0.0925458	0.0851117
0.092368	0.0862773
0.0906736	0.0853137
0.0894761	0.0910242
0.0838942	0.0897516
0.0815707	0.089625
0.0870728	0.0899623
0.0853131	0.0903778
0.0874736	0.0905898
0.0902923	0.0877683
0.0859531	0.0884196
0.0861049	0.0903649
0.0842663	0.0960228
0.0864399	0.0957885
0.0850997	0.0927945
0.0879088	0.0898078
0.0857776	0.0917999
0.0853518	0.0955692
0.0860477	0.0964807
0.0840435	0.0955143
0.0864954	0.0918217
0.0838728	0.0913534
0.0826452	0.0884484
0.0807957	0.0935581
0.0848182	0.0904505
0.0830014	0.0916666
0.0846061	0.0883677
0.0830354	0.0866001
0.0880954	0.0832493
0.0841362	0.0852814
0.0847106	0.0860891
0.0897025	0.0855954
0.0906617	0.0883534
0.0877661	0.0865659
0.0872902	0.0827758
0.0862673	0.0817261
0.089782	0.0861834
0.0906135	0.0868159
0.085549	0.0866235
0.0852439	0.0876393
0.0829527	0.0876719
0.0852669	0.0912282
0.0812958	0.0884001
0.078681	0.0876031
0.0790647	0.0878577
0.0815552	0.0887256
0.0840251	0.0866099
0.0849386	0.0843382
0.0854867	0.0846808
0.0842108	0.0859494
0.0880211	0.085322
0.0930801	0.0826459
0.0894539	0.08289
0.0905033	0.0809308
0.0825144	0.0834666
0.0835133	0.0812404
0.0836293	0.0829625
0.082208	0.0895694
0.0841735	0.0870633
0.0859249	0.0832584
0.0907352	0.0821003
0.0881637	0.0792881
0.0831829	0.0831944
0.0797763	0.084299
0.0794311	0.0911261
0.0788798	0.0895806
0.0768041	0.0888141
0.0799575	0.0864054
0.0795903	0.0851023
0.0815123	0.0848886
0.0814437	0.0839983
0.0821993	0.0850373
0.0760671	0.0867937
0.0777963	0.0911893
0.0809616	0.0933394
0.0792099	0.0951077
0.0786371	0.0899679
0.0815784	0.0893527
0.0868837	0.0940739
0.0845906	0.0917966
0.0817217	0.0897119
0.0773963	0.091694
0.0797572	0.0934615
0.081586	0.0940828
0.0760408	0.0959619
0.0772368	0.0970986
0.0760539	0.0991784
0.0754084	0.100713
0.0770779	0.102551
0.0778011	0.101012
0.0801258	0.0967068
0.0812265	0.0931781
0.084636	0.094134
0.0850057	0.0967948
0.0847188	0.0963124
0.0863959	0.0951487
0.0889026	0.0968862
0.08681	0.0959133
0.0854969	0.0920932
0.0866386	0.0883762
0.0868679	0.0903318
0.085364	0.0901255
0.0835313	0.0927682
0.0818071	0.0959407
0.0807863	0.0964131
0.0864762	0.092568
0.0857614	0.0923794
0.0859005	0.0878873
0.0858972	0.0920314
0.0861983	0.0940341
0.0837054	0.0945013
0.0801458	0.0920513
0.0793472	0.090102
0.0818278	0.093667
0.0834534	0.0898978
0.0814484	0.0862786
0.0823691	0.0860022
0.087861	0.0902198
0.0885272	0.0903316
0.0877834	0.0905988
0.0841606	0.0905127
0.0865732	0.0894083
0.0829746	0.0904313
0.0865866	0.0877672
0.0842368	0.0864135
0.0802064	0.0871773
0.0778626	0.0836527
0.0848539	0.0840172
0.091772	0.0882128
0.0918311	0.0876838
0.0891445	0.0951813
0.0866384	0.0990457
0.0912645	0.0993863
0.085089	0.0983884
0.0807527	0.0972939
0.0784125	0.0957016
0.077656	0.0957845
0.0787638	0.0973515
0.0773095	0.0953949
0.0775187	0.0900479
0.0782368	0.0936539
0.075796	0.0941879
0.0768717	0.0936919
0.0850709	0.090609
0.0858832	0.0905111
0.0856307	0.0934943
0.0844521	0.0946447
0.0892621	0.0913299
0.089229	0.0901728
0.0894643	0.0903805
0.0886933	0.0988492
0.0878187	0.102732
0.0921763	0.105466
0.0911055	0.0996955
0.085365	0.0969704
0.0811015	0.0936925
0.0804379	0.0939141
0.0834277	0.0962842
0.0863194	0.0970008
0.086761	0.102944
0.0953997	0.103749
0.0935921	0.103563
0.0948513	0.108066
0.0978523	0.105368
0.0969017	0.10214
0.0890567	0.0948285
0.0850822	0.0902938
0.0818566	0.088698
0.0830861	0.0845191
0.085537	0.0841059
0.0801731	0.0882723
0.0790125	0.089927
0.0832428	0.0926829
0.0803193	0.0921806
0.0830324	0.0916793
0.0824548	0.0907106
0.0862927	0.0889252
0.0882042	0.0942599
0.0841599	0.0955003
0.0814992	0.0949218
0.0803525	0.0935592
0.078478	0.0946745
0.0829166	0.0916832
0.080479	0.0962254
0.0838606	0.0909719
0.0830142	0.0920004
0.0792416	0.0912284
0.0761837	0.0901144
0.0763988	0.0928254
0.0841529	0.0982562
0.080216	0.0969662
0.0818565	0.0941276
0.0850037	0.0910861
0.0846773	0.0914206
0.0805082	0.0890937
0.0863386	0.0917408
0.0885946	0.0905683
0.0878535	0.0937933
0.088066	0.0959449
0.0863637	0.0962617
0.0830953	0.0946041
0.0822838	0.0923735
0.0824156	0.0885834
0.0829275	0.0908234
0.0838786	0.0934035
0.0877607	0.0911913
0.0900086	0.0946137
0.0929845	0.0943147
0.0907318	0.0942192
0.0947693	0.0961373
0.0975072	0.0976411
0.0956611	0.0990319
0.0905121	0.099335
0.0860802	0.0977135
0.0848276	0.0965015
0.0854447	0.102219
0.0834841	0.101377
0.0838764	0.101293
0.0816931	0.0973663
0.0801179	0.0941301
0.0808715	0.0972904
0.0825245	0.096245
0.0835364	0.0960357
0.0784035	0.0938458
0.0765184	0.0953848
0.0796278	0.0941599
0.0824072	0.0934534
0.0840889	0.087609
0.0841033	0.097814
0.0864748	0.100158
0.0885733	0.0981737
0.087722	0.0953109
0.0830492	0.0951036
0.0851677	0.0971814
0.0907942	0.102737
0.0910726	0.0999214
0.0906246	0.101971
0.090373	0.102766
0.0907793	0.0982405
0.0875272	0.0979497
0.0874249	0.0966005
0.0860127	0.0989696
0.0917717	0.100809
0.0900231	0.104273
0.0901935	0.102468
0.0847129	0.104331
0.0862689	0.103173
0.0834802	0.0993954
0.083601	0.0947665
0.0834119	0.0941759
0.0853839	0.0941381
0.081177	0.0900101
0.0779194	0.0919307
0.0812917	0.0923855
0.0802055	0.0911664
0.0790432	0.0924207
0.0773733	0.090645
0.0770929	0.0851081
0.0767165	0.0868523
0.0753318	0.0874919
0.0758	0.0875076
0.0735257	0.0909314
0.0757509	0.0881303
0.0794291	0.0874885
0.0785335	0.0879822
0.0753652	0.0874682
0.0766386	0.0919798
0.0755747	0.088615
0.0766732	0.0844964
0.0759757	0.0884764
0.0793054	0.0878321
0.086055	0.0893327
0.0851685	0.0982733
0.0798011	0.0995896
0.0818539	0.101976
0.0741484	0.0981892
0.0734187	0.102615
0.0734791	0.101506
0.07441	0.0959922
0.0755682	0.0991836
0.0758596	0.0961447
0.0760625	0.0935504
0.08157	0.0961416
0.0811627	0.0995366
0.0904915	0.100287
0.0909771	0.0966196
0.085982	0.0989261
0.0861969	0.0903803
0.0844343	0.0937596
0.084277	0.101293
0.0816534	0.10199
0.0836482	0.0973446
0.0828692	0.0995417
0.0858876	0.0961113
0.0897185	0.0919836
0.0912666	0.0883785
0.0865562	0.0914506
0.0829467	0.0868442
0.0870894	0.082902
0.0865669	0.08487
0.0909569	0.086277
0.0924533	0.0890921
0.0913049	0.0857127
0.086325	0.086373
0.0896711	0.0867587
0.0869413	0.0871963
0.0833105	0.0893335
0.0828128	0.0905216
0.0809117	0.0952415
0.0761593	0.0929848
0.0785177	0.0944441
0.0790672	0.0902412
0.0865085	0.0917271
0.0861654	0.0943004
0.0839403	0.0886141
0.084419	0.0919575
0.0836179	0.0986059
0.0805433	0.102211
0.0785996	0.106995
0.0788861	0.105598
0.0849994	0.104635
0.0861367	0.0984348
0.0864469	0.0972419
0.0869756	0.0963225
0.0908247	0.0958901
0.0881675	0.0985199
0.0935487	0.101108
0.095952	0.10282
0.101399	0.100385
0.0961002	0.0962613
0.0871425	0.0984368
0.0835893	0.100537
0.0814572	0.100335
0.0819687	0.0953954
0.0799859	0.09271
0.0820147	0.0921624
0.0850419	0.0937981
0.0850851	0.0982683
0.0897036	0.100201
0.0892036	0.101177
0.0916175	0.0974076
0.0906406	0.100251
0.0923064	0.103318
0.0923908	0.0999487
0.0878895	0.102174
0.0852932	0.102962
0.079293	0.10248
0.0803009	0.10068
0.0887149	0.0959527
0.090409	0.0918912
0.0893948	0.0949421
0.0901979	0.0966346
0.089203	0.0975066
0.0895213	0.0959189
0.0909706	0.0977002
0.0886374	0.0959757
0.0844982	0.0958429
0.0829088	0.0965641
0.0848408	0.0898501
0.0810726	0.0900774
0.0831116	0.0898127
0.081984	0.0889892
0.0815471	0.0908939
0.0807293	0.0954676
0.0797791	0.0948389
0.0823733	0.0977225
0.082505	0.0971671
0.0770295	0.099632
0.0743459	0.104761
0.0779112	0.107416
0.0784902	0.105684
0.0784739	0.0995089
0.0817896	0.0958195
0.0802822	0.0907047
0.0791471	0.0901475
0.0760849	0.0873047
0.0796322	0.0830997
0.0779653	0.0818234
0.0728701	0.0836686
0.0777262	0.0838165
0.0839332	0.0886041
0.0874618	0.0894612
0.0892199	0.0897006
0.0949348	0.0889803
0.0890077	0.0881873
0.0843243	0.0871616
0.0795997	0.0928889
0.0763145	0.0928097
0.0800515	0.0907618
0.0819591	0.0839658
0.0848355	0.0878111
0.085969	0.085129
0.087397	0.0856409
0.0902697	0.0898897
0.0938549	0.0871546
0.0946094	0.0903516
0.0968966	0.0887628
0.0955242	0.0840545
0.099238	0.0879278
0.0928628	0.0908683
0.0920388	0.0892314
0.0901778	0.0864771
0.0889751	0.0875275
0.0836407	0.0875105
0.0825496	0.0876906
0.0841833	0.0888632
0.0854886	0.0879161
0.0863558	0.0895045
0.0925858	0.0895058
0.0953468	0.0878896
0.0929492	0.0859284
0.0942774	0.0870559
0.0906734	0.087812
0.0898617	0.0873216
0.0892501	0.0851876
0.0927548	0.0854236
0.0891097	0.0877655
0.0891811	0.0903839
0.0934259	0.0883042
0.0837258	0.0912729
0.0877707	0.0947899
0.0899799	0.093775
0.091705	0.0931816
0.0847266	0.0894188
0.087034	0.0879861
0.0891122	0.0850557
0.0879015	0.0826192
0.0864039	0.0811135
0.0843383	0.0788713
0.0887854	0.0851301
0.086676	0.0863741
0.0844649	0.0875356
0.085017	0.0877966
0.0860914	0.0895819
0.0844217	0.0902325
0.0832201	0.0900684
0.0906452	0.0863095
0.0932898	0.0875043
0.0910285	0.0902134
0.0910823	0.0897355
0.0903292	0.0910525
0.0910945	0.0872646
0.0917416	0.0855274
0.0977374	0.0885879
0.0936942	0.0912129
0.0894359	0.0908586
0.0844978	0.0957593
0.0848905	0.0921096
0.0837104	0.0917359
0.0820453	0.0920515
0.0815229	0.0928584
0.0784453	0.0945451
0.0801105	0.0885222
0.0802884	0.0922655
0.0874765	0.0927702
0.0895406	0.0967759
0.0932007	0.0966005
0.0941589	0.0948721
0.0924516	0.0955939
0.094406	0.0930947
0.0923222	0.0925621
0.0908754	0.0930715
0.090014	0.0918093
0.0839028	0.0925072
0.0791312	0.0907319
0.0783403	0.0881712
0.0823555	0.0901956
0.0789885	0.0944466
0.0841033	0.0925657
0.0836623	0.0956808
0.0839615	0.0989344
0.0855173	0.0988651
0.088613	0.0998813
0.0909956	0.0987556
0.0878818	0.0980505
0.0879807	0.092963
0.0836936	0.0901614
0.0825172	0.0920812
0.0786288	0.0897424
0.0769781	0.0902075
0.0781507	0.0978395
0.0843927	0.0976016
0.0818121	0.100872
0.0806882	0.0982707
0.0792036	0.0981548
0.082663	0.0947265
0.0857324	0.096839
0.0867332	0.0987453
0.0899913	0.0991066
0.0883415	0.0990019
0.0882149	0.104133
0.0870614	0.102898
0.0877582	0.10146
0.0815897	0.0942305
0.0835067	0.0946028
0.0874399	0.0929062
0.0784267	0.0953933
0.0801365	0.100887
0.0788883	0.102294
0.0783504	0.0999084
0.079444	0.0971836
0.0834621	0.0972009
0.0861962	0.100425
0.0888292	0.0957423
0.0864306	0.0946604
0.0864907	0.0959084
0.0884054	0.0949911
0.0891467	0.0960766
0.0864201	0.0933732
0.0888363	0.096344
0.0852922	0.092866
0.0807571	0.0872332
0.0771969	0.0888484
0.0739601	0.0924689
0.0744688	0.097382
0.0720211	0.0989583
0.0711002	0.0960737
0.0778766	0.0949116
0.0804578	0.0943305
0.0809391	0.0960142
0.0793959	0.0998556
0.0787967	0.100396
0.0790997	0.0974349
0.0749604	0.0981753
0.0700077	0.0946545
0.0727338	0.0961615
0.079867	0.092801
0.0794639	0.089092
0.0793116	0.0877542
0.0795843	0.0878998
0.0778762	0.0886095
0.0762013	0.0862724
0.0763798	0.0849475
0.0760847	0.0921377
0.0815811	0.0906831
0.0808027	0.0888445
0.0827495	0.0943265
0.0794076	0.0917814
0.0801868	0.0869966
0.0833609	0.0871467
0.0867063	0.0898013
0.0834866	0.087399
0.0809352	0.0886957
0.0799647	0.0911126
0.0843478	0.0873606
0.0876041	0.0917332
0.0877685	0.0954193
0.0872258	0.0941292
0.0939571	0.0910713
0.0931621	0.093721
0.0874298	0.0938303
0.0815674	0.0954554
0.086675	0.0953122
0.0857176	0.0945977
0.0850412	0.0901305
0.0900973	0.0871479
0.0966956	0.088773
0.100157	0.0930418
0.097926	0.0904706
0.0949522	0.0873886
0.0908554	0.0871987
0.0863775	0.0907584
0.0874817	0.0949726
0.0926084	0.0929392
0.0923527	0.0942329
0.0971702	0.0934514
0.0986388	0.0913605
0.0968711	0.0932198
0.0928594	0.0928975
0.0914939	0.0913766
0.0935872	0.0926494
0.0973905	0.0943732
0.0968094	0.093081
0.0976435	0.0959317
0.0972206	0.0990071
0.0932914	0.0962578
0.0957992	0.0951932
0.094623	0.0939113
0.0938776	0.0945158
0.0960998	0.0947275
0.0930918	0.0927183
0.0886569	0.0935712
0.0929415	0.0941451
0.092125	0.0920179
0.0865982	0.0912861
0.0884143	0.0938854
0.0900307	0.0915088
0.0903655	0.0913492
0.0818767	0.0945176
0.0778389	0.0960214
0.0763429	0.0957488
0.0776991	0.0941599
0.0823005	0.0962393
0.0794	0.0982427
0.0782006	0.0986958
0.077342	0.0979596
0.0791202	0.104659
0.0717708	0.101353
0.0773272	0.102599
0.0793595	0.104237
0.0784508	0.106165
0.0819973	0.109108
0.0865316	0.108382
0.0833421	0.109027
0.0835304	0.109845
0.0842799	0.110161
0.0826348	0.101269
0.0842096	0.100985
0.0853863	0.101662
0.0870852	0.0985033
0.0821331	0.103295
0.0806284	0.0998129
0.0863527	0.0960838
0.087703	0.0915662
0.0807611	0.0900856
0.0804883	0.0919375
0.0843178	0.0993987
0.0844339	0.0973719
0.084215	0.10247
0.0886796	0.100735
0.0869207	0.0932512
0.0883608	0.100698
0.0899322	0.104895
0.0914563	0.108532
0.0865114	0.102925
0.0808982	0.105803
0.0784203	0.102454
0.0817764	0.105063
0.0788497	0.103826
0.0839964	0.0997115
0.0799089	0.0961222
0.0768996	0.0978929
0.0773866	0.0969911
0.0850159	0.0940849
0.0849792	0.100076
0.0925216	0.103601
0.091583	0.0986285
0.0916776	0.0976144
0.0880475	0.0976901
0.0902203	0.0968421
0.0874342	0.0957116
0.0867654	0.0962413
0.0838965	0.0954344
0.0873709	0.099001
0.0859273	0.0972491
0.0902999	0.0987225
0.0876737	0.0985889
0.0844965	0.0975249
0.0839576	0.0997393
0.0844815	0.101483
0.0844579	0.0984356
0.0818116	0.0961948
0.0816282	0.0991041
0.082617	0.105835
0.0811441	0.101877
0.079481	0.102751
0.0793756	0.108321
0.0768862	0.107635
0.0774227	0.108331
0.0751173	0.110472
0.0736704	0.112533
0.0772499	0.114387
0.0790185	0.114322
0.0801668	0.111413
0.077765	0.113071
0.0798716	0.114251
0.0729974	0.117098
0.069669	0.109469
0.0770584	0.104915
0.0772307	0.104982
0.0808373	0.101317
0.0787668	0.0997597
0.0822776	0.100543
0.0880573	0.0945114
0.092575	0.0937196
0.0934932	0.0941332
0.09836	0.0913774
0.0974057	0.0899088
0.0943169	0.0922209
0.0858355	0.0930095
0.0834417	0.0979933
0.0873144	0.0999117
0.08653	0.101431
0.0907004	0.102975
0.0906546	0.104726
0.0929666	0.108854
0.0842227	0.105121
0.0838486	0.106916
0.0814213	0.107812
0.080688	0.107668
0.0811599	0.106994
0.0804616	0.11033
0.0762967	0.115931
0.0753638	0.112269
0.0751052	0.108453
0.0725348	0.110776
0.0757969	0.10993
0.0727661	0.105828
0.0741558	0.105528
0.0751058	0.101924
0.0761714	0.0983716
0.0753918	0.103515
0.0767715	0.103297
0.0797974	0.0993603
0.0782846	0.100703
0.0775919	0.102995
0.0773558	0.103709
0.0766418	0.100393
0.0758753	0.0985622
0.0755142	0.0945965
0.0775695	0.0960828
0.0754909	0.0995724
0.0732208	0.100766
0.0765518	0.101323
0.0756662	0.101713
0.0758282	0.102086
0.0727659	0.0995634
0.0718078	0.0945824
0.0698496	0.0951061
0.0718121	0.0948362
0.0755308	0.096513
0.0781455	0.0970541
0.0766169	0.100338
0.078018	0.097172
0.075495	0.0988542
0.0738326	0.0998057
0.0738243	0.0996198
0.0756357	0.0961897
0.0818786	0.0960291
0.081653	0.0979262
0.0881905	0.0962624
0.0876022	0.0983376
0.0870036	0.0961674
0.0811441	0.0971881
0.0801867	0.0979818
0.0811771	0.0988567
0.0805407	0.100392
0.0792411	0.0937333
0.0860267	0.0909414
0.0834674	0.0935532
0.0829698	0.0960148
0.0834603	0.094531
0.0830798	0.0964414
0.0843561	0.0998676
0.0845854	0.0987003
0.0866702	0.101899
0.0864154	0.099456
0.0851046	0.100369
0.0857571	0.102001
0.0836836	0.102433
0.0805476	0.101117
0.0765158	0.0967824
0.0755588	0.0993182
0.0748903	0.0922761
0.0748769	0.0878226
0.0762643	0.091058
0.0759823	0.0928607
0.0744884	0.0925393
0.0796903	0.095817
0.0793149	0.0977421
0.0807748	0.0991177
0.07893	0.0979102
0.0802252	0.0942999
0.0832215	0.0943808
0.0880098	0.0956763
0.081111	0.0911141
0.0786172	0.0889033
0.0840649	0.0928763
0.0836819	0.0966447
0.0848906	0.0978297
0.083516	0.0962581
0.0846732	0.0972298
0.0877225	0.0983017
0.0844843	0.100691
0.0832595	0.10546
0.0801724	0.101413
0.0795338	0.103482
0.0808376	0.0996428
0.0834109	0.0976822
0.0820589	0.0984962
0.0792996	0.0968807
0.0745422	0.100364
0.0729789	0.0941772
0.0708014	0.0927196
0.0756904	0.0882795
0.0734986	0.0952582
0.0753156	0.0946836
0.0826617	0.0970901
0.0872713	0.100091
0.0821647	0.0965597
0.078573	0.0994592
0.0812899	0.0996047
0.0827681	0.101921
0.0792507	0.100075
0.0808556	0.0943686
0.0786781	0.0947498
0.0825717	0.0954331
0.0840918	0.0963766
0.0785356	0.102534
0.0809471	0.100871
0.0817172	0.0997337
0.0830027	0.0986249
0.081296	0.100807
0.086251	0.106114
0.0817814	0.10435
0.0768665	0.103701
0.0745782	0.103396
0.0782375	0.106151
0.078717	0.0974313
0.080144	0.0978811
0.0822529	0.0965556
0.0746429	0.0974641
0.0742838	0.101055
0.0760607	0.0999577
0.0748055	0.10319
0.0768689	0.100433
0.077531	0.101341
0.0774866	0.100504
0.0742399	0.103824
0.0784712	0.10113
0.0751354	0.100145
0.0791791	0.0957316
0.0774009	0.0922118
0.0835107	0.0917473
0.0867177	0.0924897
0.091583	0.090586
0.0964222	0.0880652
0.0948681	0.0884697
0.0922823	0.0928726
0.0927895	0.0929351
0.0920714	0.0943121
0.0886045	0.0967601
0.0870411	0.0961667
0.0794639	0.0924729
0.0778035	0.09197
0.077475	0.0914918
0.0771346	0.0939475
0.0768158	0.0977813
0.0768563	0.10217
0.0766714	0.105779
0.0793772	0.105307
0.0904147	0.102084
0.08515	0.100852
0.0841907	0.0990954
0.0839497	0.0936409
0.0815799	0.0937086
0.0809063	0.0887088
0.0855815	0.088198
0.0855146	0.0938726
0.0828072	0.0929903
0.0785461	0.0904275
0.0775229	0.0907344
0.082396	0.0894011
0.0872026	0.0899732
0.0827322	0.0925448
0.0831454	0.0914703
0.0805838	0.0912631
0.0819469	0.0919184
0.0794415	0.0974435
0.0824728	0.0981024
0.0882689	0.095111
0.085347	0.0914567
0.0838459	0.0900518
0.0843843	0.0919069
0.0829299	0.0923658
0.0837421	0.0945504
0.0802941	0.0933621
0.0766408	0.093888
0.075685	0.0894725
0.0738309	0.0918736
0.0787954	0.088859
0.0819881	0.086447
0.0798695	0.0888109
0.0771928	0.0916092
0.0746365	0.0897975
0.0793965	0.0934755
0.079802	0.097722
0.0791321	0.0940223
0.0791574	0.0954703
0.0763267	0.0966489
0.0805718	0.100238
0.0794654	0.0981064
0.077791	0.0983163
0.0778983	0.0997664
0.0767028	0.102684
0.0765959	0.104984
0.0768071	0.0999767
0.0772751	0.0952837
0.0803729	0.0977809
0.0777839	0.0987074
0.0793997	0.0995893
0.0830814	0.094329
0.0835741	0.0886476
0.081606	0.0876519
0.0771691	0.0860577
0.0797438	0.0837183
0.0782011	0.0840769
0.0768765	0.0931762
0.0782417	0.0968651
0.0791217	0.102859
0.0758052	0.102391
0.0768917	0.0958386
0.0796177	0.0991059
0.0849241	0.0985056
0.0850513	0.104463
0.0807041	0.100686
0.0756566	0.0978317
0.0706792	0.0981568
0.076009	0.0967172
0.0766385	0.0970802
0.07688	0.100537
0.0777737	0.0932079
0.0761582	0.0843884
0.0791172	0.0867877
0.0864992	0.0902091
0.0820892	0.0927725
0.0904261	0.0934016
0.0862018	0.0962237
0.0811109	0.09628
0.0786696	0.0952916
0.0772088	0.0967892
0.0811708	0.0935535
0.0867346	0.095801
0.0894926	0.0994204
0.083786	0.10385
0.080407	0.106966
0.0783008	0.103455
0.0781244	0.105751
0.0764738	0.103438
0.0762671	0.0949726
0.0782268	0.0972453
0.0771218	0.0986242
0.0792247	0.103238
0.0757206	0.10279
0.0753763	0.106509
0.0755911	0.108801
0.0775313	0.104696
0.0753691	0.106781
0.0720342	0.107106
0.074615	0.105382
0.0771632	0.100621
0.081119	0.100463
0.08162	0.104585
0.0768421	0.102232
0.07782	0.105707
0.0768107	0.101425
0.07528	0.0994697
0.0754851	0.102802
0.0738951	0.0989073
0.0730453	0.0922507
0.0765024	0.0949478
0.0771041	0.0956774
0.0753484	0.0971253
0.0786629	0.0975915
0.0793599	0.0935739
0.0808027	0.0922009
0.0841451	0.0916499
0.0820592	0.0969471
0.0806219	0.0943941
0.0832182	0.0943563
0.0841534	0.0950522
0.0845228	0.0995055
0.08372	0.0982175
0.0796103	0.102897
0.0779795	0.105225
0.0829367	0.10641
0.0847873	0.110866
0.0795555	0.112449
0.0834102	0.102725
0.0850443	0.105004
0.0853152	0.102817
0.087549	0.101913
0.0871895	0.0982929
0.0839106	0.0930855
0.0842313	0.0895432
0.0854041	0.092107
0.0880272	0.0979199
0.0859712	0.0939463
0.0810917	0.0941426
0.0835693	0.0960929
0.0887895	0.0961972
0.0816328	0.0942593
0.0754263	0.0916351
0.0722255	0.0955015
0.0707746	0.0978548
0.0720622	0.10386
0.0707325	0.0998903
0.0698207	0.0998229
0.0714636	0.0973557
0.0739893	0.0941398
0.0799183	0.0952626
0.08133	0.0943328
0.0774452	0.0970938
0.0771721	0.096833
0.0789884	0.102315
0.077469	0.100957
0.0770028	0.0960575
0.0779457	0.0942416
0.0827043	0.0916866
0.0838965	0.0910674
0.081313	0.0991621
0.0786775	0.094817
0.0807254	0.0913543
0.0818251	0.0949448
0.0815145	0.0967753
0.0787503	0.101314
0.0739129	0.0991942
0.0746354	0.0952987
0.0773376	0.0951129
0.0786749	0.0939421
0.0778781	0.0948503
0.0780948	0.0968716
0.0815232	0.10078
0.0812122	0.0990006
0.0819186	0.0996515
0.0850742	0.101049
0.0872754	0.101593
0.0867432	0.0968767
0.0836509	0.0989015
0.0788628	0.100955
0.07829	0.102035
0.0767408	0.0986743
0.0838455	0.101141
0.0827054	0.0950527
0.0831775	0.0926585
0.0887014	0.0924186
0.0890664	0.0958596
0.0904647	0.0924037
0.0899363	0.0910961
0.0906725	0.0871018
0.0876537	0.0890372
0.0877508	0.0877625
0.0845488	0.0910588
0.0891968	0.0967224
0.0877408	0.0938607
0.0835578	0.0951203
0.0801186	0.0952692
0.073515	0.0919447
0.0757799	0.0909632
0.0818735	0.0878777
0.086695	0.0884342
0.0849132	0.089584
0.0822634	0.0944326
0.0770756	0.0959951
0.0837668	0.0967707
0.0867953	0.0974831
0.0835775	0.102787
0.0815071	0.101177
0.0802933	0.102684
0.0809311	0.0992598
0.0805243	0.0983603
0.0826532	0.0962899
0.0825614	0.0964414
0.0777368	0.0977409
0.0767382	0.0980645
0.0774031	0.0983571
0.0792982	0.0985191
0.0784651	0.0981206
0.0790228	0.0960192
0.079481	0.0973032
0.0845291	0.0961928
0.0821898	0.0902719
0.0892971	0.0929926
0.0887704	0.0923502
0.0873145	0.0939848
0.0843514	0.0961531
0.08454	0.0967099
0.089955	0.0947567
0.0842292	0.0988787
0.0860961	0.102984
0.0829312	0.101636
0.0803858	0.0988811
0.0791257	0.0974186
0.0780377	0.0970235
0.0769226	0.097877
0.077482	0.0988759
0.0789209	0.100871
0.0740202	0.0982499
0.0794334	0.101248
0.0769232	0.0971054
0.0780712	0.0993468
0.0779639	0.0983379
0.0769961	0.101664
0.0712064	0.0986436
0.0731065	0.0964473
0.0755299	0.0897048
0.0704985	0.086305
0.0774301	0.090572
0.0813516	0.0893959
0.0837793	0.0911892
0.0831261	0.0950946
0.0862213	0.0966124
0.0807538	0.0963624
0.0828972	0.0982357
0.0902523	0.101983
0.0930037	0.100478
0.0894916	0.0956591
0.0865302	0.0994503
0.0886662	0.0981868
0.0833497	0.0966876
0.0820981	0.0945128
0.0780206	0.0923354
0.0769065	0.0905871
0.0801956	0.0862542
0.0774668	0.0879115
0.0811286	0.0865646
0.0820361	0.0919065
0.0769316	0.093232
0.0783558	0.0910446
0.0793369	0.0869989
0.0855729	0.0884164
0.0864537	0.0925375
0.0839346	0.0892693
0.0818685	0.0936794
0.0825678	0.0947449
0.0836857	0.092555
0.0828676	0.095427
0.0815853	0.101993
0.0811946	0.102662
0.0822669	0.0975374
0.0840256	0.0929827
0.084364	0.0922908
0.0835601	0.0976623
0.0874682	0.0967509
0.0868244	0.0937976
0.086512	0.0952821
0.0848238	0.0983191
0.0797532	0.0976332
0.0822307	0.0975199
0.0812153	0.0975668
0.0767927	0.0957634
0.0804904	0.0918185
0.0818075	0.0917379
0.0836154	0.0948087
0.0798775	0.092957
0.0759463	0.0962676
0.0790954	0.0968747
0.0799874	0.0944027
0.0822424	0.0989734
0.0863584	0.0965872
0.0861989	0.0950377
0.0818858	0.0955402
0.0866744	0.0936008
0.087124	0.0979783
0.0876026	0.0986888
0.0889754	0.0966596
0.0923948	0.0972163
0.0929856	0.0989267
0.0949446	0.101611
0.0970053	0.0973091
0.095216	0.101395
0.0958515	0.10543
0.0898966	0.106153
0.0865415	0.105767
0.086161	0.0982637
0.0852668	0.0979757
0.0862634	0.100276
0.0831054	0.101072
0.0838995	0.0987479
0.0814219	0.0990477
0.0826794	0.0934081
0.0808224	0.0925648
0.0853867	0.0904011
0.0853729	0.0946784
0.0818958	0.0925281
0.0775367	0.0891881
0.0769997	0.086698
0.0777323	0.0843486
0.0800934	0.0879409
0.081777	0.0893528
0.0851432	0.0847843
0.0870497	0.0828005
0.0881777	0.0869316
0.0876622	0.091694
0.0892284	0.0913495
0.087518	0.0957105
0.0843561	0.0996224
0.0821512	0.0977207
0.0765007	0.0973415
0.0746448	0.0958117
0.0808808	0.0973184
0.0857975	0.0911132
0.0866034	0.0898683
0.0852734	0.0935292
0.0806052	0.0928702
0.0872698	0.0966992
0.0882636	0.0979228
0.0851748	0.093461
0.0812899	0.0902077
0.0818	0.0861129
0.0843062	0.087192
0.0813083	0.0878494
0.0806456	0.0904923
0.0799022	0.0954434
0.0826003	0.0972773
0.0811831	0.0978235
0.0823597	0.0984656
0.083691	0.099431
0.0873386	0.0910488
0.0886295	0.0905323
0.0876308	0.0910395
0.081883	0.0880725
0.081903	0.083086
0.0827628	0.0857927
0.0763711	0.0888995
0.0802852	0.0849048
0.0876905	0.0838554
0.0866211	0.0879595
0.0819002	0.0892846
0.0833012	0.0902498
0.082507	0.0957121
0.0790315	0.0951249
0.0783274	0.094819
0.0761271	0.0875504
0.0816302	0.0860536
0.0794598	0.0864439
0.07989	0.0797698
0.074868	0.07982
0.0803791	0.0809554
0.0817927	0.0807471
0.0844788	0.082748
0.0865225	0.0841402
0.0871419	0.0888253
0.0880726	0.0872166
0.0904303	0.0833413
0.0937356	0.0865541
0.090326	0.0864526
0.0860921	0.0833673
0.0817829	0.0814751
0.0819283	0.0872471
0.0847357	0.0893691
0.0869863	0.0915088
0.0815688	0.09341
0.0761411	0.0913736
0.0755928	0.090485
0.0801283	0.0915579
0.0815552	0.0966812
0.0803496	0.0994285
0.0784584	0.102847
0.0817522	0.0979914
0.0866312	0.0992117
0.0863134	0.0964764
0.0890697	0.0970042
0.0943104	0.0931913
0.0882224	0.094414
0.0875105	0.0913151
0.0856277	0.0928818
0.0836001	0.0919338
0.0843833	0.0936549
0.0846305	0.0983475
0.0907022	0.0990254
0.0927108	0.103336
0.0926558	0.107739
0.0862706	0.100519
0.0833855	0.101813
0.0806627	0.0968094
0.0802661	0.101295
0.0802445	0.100067
0.0813003	0.104495
0.0759682	0.104037
0.0769308	0.105994
0.0781686	0.0988789
0.0788469	0.0991907
0.0775217	0.0984796
0.077056	0.102871
0.0762051	0.104019
0.0781632	0.0972558
0.0821697	0.0971684
0.0823936	0.101898
0.0825622	0.100706
0.0849496	0.0995709
0.0833687	0.0989328
0.0803559	0.0990685
0.08068	0.0992463
0.0822968	0.0948421
0.0870285	0.0935958
0.085274	0.0912701
0.0809695	0.0932613
0.074817	0.0931416
0.0763159	0.0926867
0.0841012	0.0998077
0.0821451	0.100189
0.0738043	0.0990343
0.0735765	0.0976599
0.0772778	0.0995154
0.0779579	0.100974
0.0768264	0.100096
0.0809283	0.0988155
0.0863348	0.0990175
0.0855204	0.100489
0.0837596	0.0952515
0.0815461	0.0943158
0.0775937	0.0892795
0.0759799	0.0846735
0.0760365	0.0845074
0.0755056	0.0873705
0.0769128	0.0864369
0.0788866	0.078942
0.082462	0.0799774
0.0856825	0.0836477
0.0873608	0.0886696
0.0902091	0.0886271
0.0905327	0.0891328
0.0916567	0.0921894
0.0895036	0.0901291
0.0852627	0.091068
0.0860057	0.0921954
0.0870565	0.0955458
0.0862146	0.0964636
0.0860802	0.0988974
0.0909878	0.0930948
0.090853	0.09279
0.0891187	0.0972734
0.0844415	0.0931926
0.0800959	0.0934528
0.0813988	0.105001
0.0846271	0.110554
0.0779624	0.111665
0.0764797	0.108969
0.078329	0.105567
0.0795644	0.100584
0.0825257	0.103095
0.0838075	0.107874
0.0877848	0.104387
0.0898742	0.102097
0.0889449	0.0971669
0.0867121	0.0919349
0.0843223	0.093955
0.0866709	0.089633
0.0881832	0.0893244
0.0866761	0.088709
0.0862863	0.0865485
0.0815491	0.0853415
0.0789282	0.0898152
0.0854123	0.0847188
0.0846089	0.0915215
0.0887235	0.0882338
0.08683	0.0853577
0.0850258	0.0867037
0.0846439	0.0898351
0.0871159	0.0873323
0.088297	0.0853311
0.0943891	0.0845231
0.0935827	0.0819633
0.0867282	0.081824
0.0839469	0.0842282
0.0856115	0.0859061
0.0871486	0.0874593
0.0877181	0.0905733
0.0859999	0.0879753
0.088216	0.0872478
0.0889294	0.0869355
0.0848402	0.0915554
0.0825772	0.0839295
0.0809612	0.0892756
0.0836239	0.0889283
0.0813272	0.0890925
0.0791142	0.0920542
0.0807781	0.0906062
0.0836213	0.0872793
0.0859561	0.0891645
0.0791536	0.0884001
0.0806967	0.0899567
0.0851475	0.0884242
0.0866477	0.096444
0.0834211	0.100401
0.0849882	0.102453
0.0827414	0.099924
0.0810974	0.0987647
0.076984	0.102324
0.0802289	0.103869
0.0824575	0.106246
0.0820269	0.104738
0.0820477	0.106575
0.084025	0.101017
0.085337	0.0977537
0.0875504	0.0949727
0.0861573	0.0940033
0.0795855	0.096787
0.080456	0.0993359
0.0831895	0.0986609
0.079549	0.101044
0.075426	0.0989055
0.0835514	0.096161
0.0850702	0.0975421
0.0825224	0.0991745
0.086002	0.098119
0.0867972	0.0983737
0.0880724	0.0979979
0.083084	0.102003
0.087479	0.101396
0.0840079	0.0975333
0.0843727	0.092137
0.0894085	0.089706
0.0889918	0.0911649
0.0858051	0.091227
0.0825121	0.0998958
0.0773099	0.100679
0.0809786	0.0997045
0.0867263	0.0965976
0.0908247	0.0942773
0.0903789	0.0914528
0.0874621	0.0938929
0.0841862	0.0957695
0.0863858	0.100631
0.0834009	0.104545
0.0853429	0.106424
0.0853158	0.100249
0.0854112	0.0975164
0.0837078	0.0964909
0.0802185	0.0953198
0.0777575	0.0945287
0.0820932	0.0981495
0.0802715	0.0965447
0.08058	0.0978513
0.0823718	0.0969056
0.0823833	0.0904741
0.0796101	0.0913046
0.077029	0.0920502
0.0744318	0.0882321
0.0770689	0.0976839
0.0810655	0.100011
0.0807468	0.100119
0.0824219	0.0983837
0.0861399	0.0981116
0.0870949	0.0973947
0.0873081	0.0976617
0.0916813	0.0975395
0.0855659	0.0997335
0.0849173	0.0972351
0.0814936	0.0986929
0.082329	0.100133
0.0782679	0.0991531
0.0783184	0.100804
0.0768147	0.100957
0.0772608	0.0935218
0.0791141	0.0956751
0.0785699	0.0932549
0.080107	0.0864544
0.077678	0.0890429
0.0768415	0.0867168
0.0808068	0.0870381
0.0811147	0.0874052
0.0811444	0.0886503
0.0767891	0.0860757
0.0848393	0.0886521
0.0793471	0.0874227
0.0818761	0.0875305
0.0813144	0.0894202
0.0841377	0.0921321
0.0848142	0.0915901
0.0856703	0.0944566
0.0874875	0.0979966
0.0895606	0.0998089
0.0911067	0.0959425
0.0901499	0.097349
0.0898407	0.0951339
0.0863473	0.0960286
0.0844311	0.0929027
0.0859469	0.0926363
0.0843145	0.0908769
0.0854405	0.096856
0.0852701	0.100139
0.0834913	0.098394
0.0827147	0.0997896
0.0867056	0.101664
0.0879281	0.102711
0.0828888	0.0998689
0.079952	0.0940232
0.0752896	0.0923819
0.081512	0.0972111
0.0801878	0.0948776
0.0830312	0.0979023
0.0836454	0.0973741
0.081364	0.0988324
0.0850321	0.0927732
0.0853789	0.0884722
0.0825774	0.0867976
0.0789261	0.0881467
0.0777664	0.0908914
0.0785456	0.0922605
0.0831803	0.0906038
0.0798913	0.090075
0.0783831	0.0948122
0.0772484	0.0996596
0.0790569	0.0976812
0.0796964	0.100065
0.0820416	0.0991116
0.0798535	0.100495
0.078013	0.0981157
0.0817667	0.0944104
0.0771332	0.0977068
0.0771227	0.0958944
0.0769979	0.0950603
0.0767013	0.0937292
0.0804691	0.0914368
0.0790033	0.0873882
0.07996	0.0874011
0.0853917	0.0877396
0.0813416	0.0896822
0.0813353	0.0890285
0.0809037	0.0916613
0.0784882	0.0876709
0.0811969	0.0906767
0.0809166	0.0924961
0.0821274	0.0942454
0.0859461	0.0972971
0.0850355	0.0992142
0.0888167	0.0980343
0.0888092	0.100406
0.0865009	0.0939719
0.0854446	0.0908076
0.0807609	0.088196
0.0785406	0.0859332
0.0785288	0.0851491
0.0801122	0.0881863
0.087907	0.0875943
0.0838825	0.0895043
0.0816722	0.0919239
0.0855429	0.0915176
0.0843915	0.0878953
0.089912	0.0890393
0.0845636	0.0882704
0.0836722	0.0881255
0.0874643	0.0903994
0.0857309	0.0874213
0.0865368	0.0900742
0.0889232	0.0909196
0.0866467	0.0921144
0.0871344	0.0873586
0.080658	0.0900014
0.0760632	0.0922407
0.071127	0.0902603
0.0707078	0.0917451
0.0678942	0.0907811
0.0743064	0.0918175
0.080415	0.0866641
0.0838167	0.0842809
0.0841559	0.0870878
0.0846262	0.0915259
0.0904683	0.0929363
0.0931477	0.0909189
0.0869814	0.0911977
0.0889452	0.0909248
0.0892481	0.0901014
0.0846063	0.0896248
0.0843574	0.0931836
0.0824667	0.0960187
0.0842225	0.096696
0.0831775	0.10198
0.0841436	0.102951
0.0829711	0.10272
0.0781268	0.10384
0.0801972	0.104538
0.081013	0.104477
0.080264	0.101124
0.0877917	0.0960404
0.0866586	0.095051
0.0836906	0.0953122
0.0755561	0.0922706
0.0761672	0.0909125
0.0803717	0.0864249
0.0773968	0.094283
0.0758747	0.0936515
0.0784744	0.0963192
0.0769765	0.0932559
0.0785046	0.0895668
0.0839621	0.0889186
0.0808985	0.0850285
0.0838924	0.0856938
0.0861608	0.0876939
0.0828755	0.0863308
0.0842337	0.0867564
0.0846972	0.0889446
0.0846194	0.0921949
0.0882151	0.0961887
0.0836506	0.0929594
0.0837971	0.0918278
0.0811267	0.0888615
0.0762558	0.0909788
0.0818363	0.0876213
0.0776916	0.0855211
0.0769715	0.0850002
0.0727727	0.089684
0.0762415	0.0910561
0.0759144	0.0938217
0.0740924	0.0914838
0.0754504	0.0919154
0.0763089	0.0918634
0.0813949	0.0888429
0.0801972	0.0903971
0.0773712	0.0902356
0.0759248	0.0894841
0.0774019	0.0894669
0.07834	0.0897998
0.0799402	0.0936073
0.0753796	0.0937855
0.0771786	0.0959328
0.0758759	0.0991039
0.072129	0.0996324
0.0712473	0.0985172
0.0691513	0.0920449
0.0704333	0.0974157
0.0783457	0.0967054
0.0764964	0.100255
0.075128	0.0987345
0.0762112	0.0991507
0.0802574	0.09784
0.0798892	0.0951368
0.0782596	0.0939302
0.0760153	0.095242
0.0783385	0.0993069
0.077893	0.103001
0.0763777	0.102929
0.0791245	0.100511
0.0782354	0.0972765
0.0800107	0.0937387
0.0807484	0.0927718
0.0821305	0.0948852
0.0809337	0.0897991
0.0808254	0.0953672
0.0766736	0.0926906
0.0807916	0.0900068
0.0818234	0.0919239
0.0814381	0.096883
0.0816581	0.0989743
0.0844134	0.103512
0.0818835	0.0977662
0.0820239	0.0950806
0.0805474	0.0917416
0.0820441	0.0980366
0.082038	0.0993905
0.0796599	0.0975474
0.0808383	0.100613
0.0859449	0.0938014
0.0826408	0.0895276
0.0847211	0.0916513
0.0831333	0.0910657
0.080891	0.0916254
0.0837527	0.098307
0.0799283	0.100435
0.082403	0.104487
0.0811286	0.0997298
0.0829775	0.0979733
0.0902844	0.0935127
0.0937772	0.0939485
0.0919143	0.0941205
0.093109	0.0940253
0.0878612	0.0924109
0.0798111	0.0926196
0.0800527	0.0924017
[truncated: 7 more rows]

## Sheet: One sim - Time(s) - Fil density
0	0
0.0498418	0.0498418
0.0996835	0.0996835
0.149525	0.149525
0.199367	0.199367
0.249209	0.249209
0.299051	0.299051
0.348892	0.348892
0.398734	0.398734
0.448576	0.448576
0.498418	0.498418
0.548259	0.548259
0.598101	0.598101
0.647943	0.647943
0.697785	0.697785
0.747627	0.747627
0.797468	0.797468
0.84731	0.84731
0.897152	0.897152
0.946994	0.946994
0.996835	0.996835
1.04668	1.04668
1.09652	1.09652
1.14636	1.14636
1.1962	1.1962
1.24604	1.24604
1.29589	1.29589
1.34573	1.34573
1.39557	1.39557
1.44541	1.44541
1.49525	1.49525
1.54509	1.54509
1.59494	1.59494
1.64478	1.64478
1.69462	1.69462
1.74446	1.74446
1.7943	1.7943
1.84415	1.84415
1.89399	1.89399
1.94383	1.94383
1.99367	1.99367
2.04351	2.04351
2.09335	2.09335
2.1432	2.1432
2.19304	2.19304
2.24288	2.24288
2.29272	2.29272
2.34256	2.34256
2.39241	2.39241
2.44225	2.44225
2.49209	2.49209
2.54193	2.54193
2.59177	2.59177
2.64161	2.64161
2.69146	2.69146
2.7413	2.7413
2.79114	2.79114
2.84098	2.84098
2.89082	2.89082
2.94066	2.94066
2.99051	2.99051
3.04035	3.04035
3.09019	3.09019
3.14003	3.14003
3.18987	3.18987
3.23972	3.23972
3.28956	3.28956
3.3394	3.3394
3.38924	3.38924
3.43908	3.43908
3.48892	3.48892
3.53877	3.53877
3.58861	3.58861
3.63845	3.63845
3.68829	3.68829
3.73813	3.73813
3.78797	3.78797
3.83782	3.83782
3.88766	3.88766
3.9375	3.9375
3.98734	3.98734
4.03718	4.03718
4.08703	4.08703
4.13687	4.13687
4.18671	4.18671
4.23655	4.23655
4.28639	4.28639
4.33623	4.33623
4.38608	4.38608
4.43592	4.43592
4.48576	4.48576
4.5356	4.5356
4.58544	4.58544
4.63528	4.63528
4.68513	4.68513
4.73497	4.73497
4.78481	4.78481
4.83465	4.83465
4.88449	4.88449
4.93434	4.93434
4.98418	4.98418
5.03402	5.03402
5.08386	5.08386
5.1337	5.1337
5.18354	5.18354
5.23339	5.23339
5.28323	5.28323
5.33307	5.33307
5.38291	5.38291
5.43275	5.43275
5.48259	5.48259
5.53244	5.53244
5.58228	5.58228
5.63212	5.63212
5.68196	5.68196
5.7318	5.7318
5.78165	5.78165
5.83149	5.83149
5.88133	5.88133
5.93117	5.93117
5.98101	5.98101
6.03085	6.03085
6.0807	6.0807
6.13054	6.13054
6.18038	6.18038
6.23022	6.23022
6.28006	6.28006
6.3299	6.3299
6.37975	6.37975
6.42959	6.42959
6.47943	6.47943
6.52927	6.52927
6.57911	6.57911
6.62896	6.62896
6.6788	6.6788
6.72864	6.72864
6.77848	6.77848
6.82832	6.82832
6.87816	6.87816
6.92801	6.92801
6.97785	6.97785
7.02769	7.02769
7.07753	7.07753
7.12737	7.12737
7.17722	7.17722
7.22706	7.22706
7.2769	7.2769
7.32674	7.32674
7.37658	7.37658
7.42642	7.42642
7.47627	7.47627
7.52611	7.52611
7.57595	7.57595
7.62579	7.62579
7.67563	7.67563
7.72547	7.72547
7.77532	7.77532
7.82516	7.82516
7.875	7.875
7.92484	7.92484
7.97468	7.97468
8.02453	8.02453
8.07437	8.07437
8.12421	8.12421
8.17405	8.17405
8.22389	8.22389
8.27373	8.27373
8.32358	8.32358
8.37342	8.37342
8.42326	8.42326
8.4731	8.4731
8.52294	8.52294
8.57278	8.57278
8.62263	8.62263
8.67247	8.67247
8.72231	8.72231
8.77215	8.77215
8.82199	8.82199
8.87184	8.87184
8.92168	8.92168
8.97152	8.97152
9.02136	9.02136
9.0712	9.0712
9.12104	9.12104
9.17089	9.17089
9.22073	9.22073
9.27057	9.27057
9.32041	9.32041
9.37025	9.37025
9.42009	9.42009
9.46994	9.46994
9.51978	9.51978
9.56962	9.56962
9.61946	9.61946
9.6693	9.6693
9.71915	9.71915
9.76899	9.76899
9.81883	9.81883
9.86867	9.86867
9.91851	9.91851
9.96835	9.96835
10.0182	10.0182
10.068	10.068
10.1179	10.1179
10.1677	10.1677
10.2176	10.2176
10.2674	10.2674
10.3172	10.3172
10.3671	10.3671
10.4169	10.4169
10.4668	10.4668
10.5166	10.5166
10.5665	10.5665
10.6163	10.6163
10.6661	10.6661
10.716	10.716
10.7658	10.7658
10.8157	10.8157
10.8655	10.8655
10.9153	10.9153
10.9652	10.9652
11.015	11.015
11.0649	11.0649
11.1147	11.1147
11.1646	11.1646
11.2144	11.2144
11.2642	11.2642
11.3141	11.3141
11.3639	11.3639
11.4138	11.4138
11.4636	11.4636
11.5134	11.5134
11.5633	11.5633
11.6131	11.6131
11.663	11.663
11.7128	11.7128
11.7627	11.7627
11.8125	11.8125
11.8623	11.8623
11.9122	11.9122
11.962	11.962
12.0119	12.0119
12.0617	12.0617
12.1116	12.1116
12.1614	12.1614
12.2112	12.2112
12.2611	12.2611
12.3109	12.3109
12.3608	12.3608
12.4106	12.4106
12.4604	12.4604
12.5103	12.5103
12.5601	12.5601
12.61	12.61
12.6598	12.6598
12.7097	12.7097
12.7595	12.7595
12.8093	12.8093
12.8592	12.8592
12.909	12.909
12.9589	12.9589
13.0087	13.0087
13.0585	13.0585
13.1084	13.1084
13.1582	13.1582
13.2081	13.2081
13.2579	13.2579
13.3078	13.3078
13.3576	13.3576
13.4074	13.4074
13.4573	13.4573
13.5071	13.5071
13.557	13.557
13.6068	13.6068
13.6566	13.6566
13.7065	13.7065
13.7563	13.7563
13.8062	13.8062
13.856	13.856
13.9059	13.9059
13.9557	13.9557
14.0055	14.0055
14.0554	14.0554
14.1052	14.1052
14.1551	14.1551
14.2049	14.2049
14.2547	14.2547
14.3046	14.3046
14.3544	14.3544
14.4043	14.4043
14.4541	14.4541
14.504	14.504
14.5538	14.5538
14.6036	14.6036
14.6535	14.6535
14.7033	14.7033
14.7532	14.7532
14.803	14.803
14.8528	14.8528
14.9027	14.9027
14.9525	14.9525
15.0024	15.0024
15.0522	15.0522
15.1021	15.1021
15.1519	15.1519
15.2017	15.2017
15.2516	15.2516
15.3014	15.3014
15.3513	15.3513
15.4011	15.4011
15.4509	15.4509
15.5008	15.5008
15.5506	15.5506
15.6005	15.6005
15.6503	15.6503
15.7002	15.7002
15.75	15.75
15.7998	15.7998
15.8497	15.8497
15.8995	15.8995
15.9494	15.9494
15.9992	15.9992
16.0491	16.0491
16.0989	16.0989
16.1487	16.1487
16.1986	16.1986
16.2484	16.2484
16.2983	16.2983
16.3481	16.3481
16.3979	16.3979
16.4478	16.4478
16.4976	16.4976
16.5475	16.5475
16.5973	16.5973
16.6472	16.6472
16.697	16.697
16.7468	16.7468
16.7967	16.7967
16.8465	16.8465
16.8964	16.8964
16.9462	16.9462
16.996	16.996
17.0459	17.0459
17.0957	17.0957
17.1456	17.1456
17.1954	17.1954
17.2453	17.2453
17.2951	17.2951
17.3449	17.3449
17.3948	17.3948
17.4446	17.4446
17.4945	17.4945
17.5443	17.5443
17.5941	17.5941
17.644	17.644
17.6938	17.6938
17.7437	17.7437
17.7935	17.7935
17.8434	17.8434
17.8932	17.8932
17.943	17.943
17.9929	17.9929
18.0427	18.0427
18.0926	18.0926
18.1424	18.1424
18.1922	18.1922
18.2421	18.2421
18.2919	18.2919
18.3418	18.3418
18.3916	18.3916
18.4415	18.4415
18.4913	18.4913
18.5411	18.5411
18.591	18.591
18.6408	18.6408
18.6907	18.6907
18.7405	18.7405
18.7903	18.7903
18.8402	18.8402
18.89	18.89
18.9399	18.9399
18.9897	18.9897
19.0396	19.0396
19.0894	19.0894
19.1392	19.1392
19.1891	19.1891
19.2389	19.2389
19.2888	19.2888
19.3386	19.3386
19.3884	19.3884
19.4383	19.4383
19.4881	19.4881
19.538	19.538
19.5878	19.5878
19.6377	19.6377
19.6875	19.6875
19.7373	19.7373
19.7872	19.7872
19.837	19.837
19.8869	19.8869
19.9367	19.9367
19.9866	19.9866
20.0364	20.0364
20.0862	20.0862
20.1361	20.1361
20.1859	20.1859
20.2358	20.2358
20.2856	20.2856
20.3354	20.3354
20.3853	20.3853
20.4351	20.4351
20.485	20.485
20.5348	20.5348
20.5847	20.5847
20.6345	20.6345
20.6843	20.6843
20.7342	20.7342
20.784	20.784
20.8339	20.8339
20.8837	20.8837
20.9335	20.9335
20.9834	20.9834
21.0332	21.0332
21.0831	21.0831
21.1329	21.1329
21.1828	21.1828
21.2326	21.2326
21.2824	21.2824
21.3323	21.3323
21.3821	21.3821
21.432	21.432
21.4818	21.4818
21.5316	21.5316
21.5815	21.5815
21.6313	21.6313
21.6812	21.6812
21.731	21.731
21.7809	21.7809
21.8307	21.8307
21.8805	21.8805
21.9304	21.9304
21.9802	21.9802
22.0301	22.0301
22.0799	22.0799
22.1297	22.1297
22.1796	22.1796
22.2294	22.2294
22.2793	22.2793
22.3291	22.3291
22.379	22.379
22.4288	22.4288
22.4786	22.4786
22.5285	22.5285
22.5783	22.5783
22.6282	22.6282
22.678	22.678
22.7278	22.7278
22.7777	22.7777
22.8275	22.8275
22.8774	22.8774
22.9272	22.9272
22.9771	22.9771
23.0269	23.0269
23.0767	23.0767
23.1266	23.1266
23.1764	23.1764
23.2263	23.2263
23.2761	23.2761
23.3259	23.3259
23.3758	23.3758
23.4256	23.4256
23.4755	23.4755
23.5253	23.5253
23.5752	23.5752
23.625	23.625
23.6748	23.6748
23.7247	23.7247
23.7745	23.7745
23.8244	23.8244
23.8742	23.8742
23.9241	23.9241
23.9739	23.9739
24.0237	24.0237
24.0736	24.0736
24.1234	24.1234
24.1733	24.1733
24.2231	24.2231
24.2729	24.2729
24.3228	24.3228
24.3726	24.3726
24.4225	24.4225
24.4723	24.4723
24.5222	24.5222
24.572	24.572
24.6218	24.6218
24.6717	24.6717
24.7215	24.7215
24.7714	24.7714
24.8212	24.8212
24.871	24.871
24.9209	24.9209
24.9707	24.9707
25.0206	25.0206
25.0704	25.0704
25.1203	25.1203
25.1701	25.1701
25.2199	25.2199
25.2698	25.2698
25.3196	25.3196
25.3695	25.3695
25.4193	25.4193
25.4691	25.4691
25.519	25.519
25.5688	25.5688
25.6187	25.6187
25.6685	25.6685
25.7184	25.7184
25.7682	25.7682
25.818	25.818
25.8679	25.8679
25.9177	25.9177
25.9676	25.9676
26.0174	26.0174
26.0672	26.0672
26.1171	26.1171
26.1669	26.1669
26.2168	26.2168
26.2666	26.2666
26.3165	26.3165
26.3663	26.3663
26.4161	26.4161
26.466	26.466
26.5158	26.5158
26.5657	26.5657
26.6155	26.6155
26.6653	26.6653
26.7152	26.7152
26.765	26.765
26.8149	26.8149
26.8647	26.8647
26.9146	26.9146
26.9644	26.9644
27.0142	27.0142
27.0641	27.0641
27.1139	27.1139
27.1638	27.1638
27.2136	27.2136
27.2634	27.2634
27.3133	27.3133
27.3631	27.3631
27.413	27.413
27.4628	27.4628
27.5127	27.5127
27.5625	27.5625
27.6123	27.6123
27.6622	27.6622
27.712	27.712
27.7619	27.7619
27.8117	27.8117
27.8616	27.8616
27.9114	27.9114
27.9612	27.9612
28.0111	28.0111
28.0609	28.0609
28.1108	28.1108
28.1606	28.1606
28.2104	28.2104
28.2603	28.2603
28.3101	28.3101
28.36	28.36
28.4098	28.4098
28.4597	28.4597
28.5095	28.5095
28.5593	28.5593
28.6092	28.6092
28.659	28.659
28.7089	28.7089
28.7587	28.7587
28.8085	28.8085
28.8584	28.8584
28.9082	28.9082
28.9581	28.9581
29.0079	29.0079
29.0578	29.0578
29.1076	29.1076
29.1574	29.1574
29.2073	29.2073
29.2571	29.2571
29.307	29.307
29.3568	29.3568
29.4066	29.4066
29.4565	29.4565
29.5063	29.5063
29.5562	29.5562
29.606	29.606
29.6559	29.6559
29.7057	29.7057
29.7555	29.7555
29.8054	29.8054
29.8552	29.8552
29.9051	29.9051
29.9549	29.9549
30.0047	30.0047
30.0546	30.0546
30.1044	30.1044
30.1543	30.1543
30.2041	30.2041
30.254	30.254
30.3038	30.3038
30.3536	30.3536
30.4035	30.4035
30.4533	30.4533
30.5032	30.5032
30.553	30.553
30.6028	30.6028
30.6527	30.6527
30.7025	30.7025
30.7524	30.7524
30.8022	30.8022
30.8521	30.8521
30.9019	30.9019
30.9517	30.9517
31.0016	31.0016
31.0514	31.0514
31.1013	31.1013
31.1511	31.1511
31.2009	31.2009
31.2508	31.2508
31.3006	31.3006
31.3505	31.3505
31.4003	31.4003
31.4502	31.4502
31.5	31.5
31.5498	31.5498
31.5997	31.5997
31.6495	31.6495
31.6994	31.6994
31.7492	31.7492
31.7991	31.7991
31.8489	31.8489
31.8987	31.8987
31.9486	31.9486
31.9984	31.9984
32.0483	32.0483
32.0981	32.0981
32.1479	32.1479
32.1978	32.1978
32.2476	32.2476
32.2975	32.2975
32.3473	32.3473
32.3972	32.3972
32.447	32.447
32.4968	32.4968
32.5467	32.5467
32.5965	32.5965
32.6464	32.6464
32.6962	32.6962
32.746	32.746
32.7959	32.7959
32.8457	32.8457
32.8956	32.8956
32.9454	32.9454
32.9953	32.9953
33.0451	33.0451
33.0949	33.0949
33.1448	33.1448
33.1946	33.1946
33.2445	33.2445
33.2943	33.2943
33.3441	33.3441
33.394	33.394
33.4438	33.4438
33.4937	33.4937
33.5435	33.5435
33.5934	33.5934
33.6432	33.6432
33.693	33.693
33.7429	33.7429
33.7927	33.7927
33.8426	33.8426
33.8924	33.8924
33.9422	33.9422
33.9921	33.9921
34.0419	34.0419
34.0918	34.0918
34.1416	34.1416
34.1915	34.1915
34.2413	34.2413
34.2911	34.2911
34.341	34.341
34.3908	34.3908
34.4407	34.4407
34.4905	34.4905
34.5403	34.5403
34.5902	34.5902
34.64	34.64
34.6899	34.6899
34.7397	34.7397
34.7896	34.7896
34.8394	34.8394
34.8892	34.8892
34.9391	34.9391
34.9889	34.9889
35.0388	35.0388
35.0886	35.0886
35.1384	35.1384
35.1883	35.1883
35.2381	35.2381
35.288	35.288
35.3378	35.3378
35.3877	35.3877
35.4375	35.4375
35.4873	35.4873
35.5372	35.5372
35.587	35.587
35.6369	35.6369
35.6867	35.6867
35.7365	35.7365
35.7864	35.7864
35.8362	35.8362
35.8861	35.8861
35.9359	35.9359
35.9858	35.9858
36.0356	36.0356
36.0854	36.0854
36.1353	36.1353
36.1851	36.1851
36.235	36.235
36.2848	36.2848
36.3347	36.3347
36.3845	36.3845
36.4343	36.4343
36.4842	36.4842
36.534	36.534
36.5839	36.5839
36.6337	36.6337
36.6835	36.6835
36.7334	36.7334
36.7832	36.7832
36.8331	36.8331
36.8829	36.8829
36.9328	36.9328
36.9826	36.9826
37.0324	37.0324
37.0823	37.0823
37.1321	37.1321
37.182	37.182
37.2318	37.2318
37.2816	37.2816
37.3315	37.3315
37.3813	37.3813
37.4312	37.4312
37.481	37.481
37.5309	37.5309
37.5807	37.5807
37.6305	37.6305
37.6804	37.6804
37.7302	37.7302
37.7801	37.7801
37.8299	37.8299
37.8797	37.8797
37.9296	37.9296
37.9794	37.9794
38.0293	38.0293
38.0791	38.0791
38.129	38.129
38.1788	38.1788
38.2286	38.2286
38.2785	38.2785
38.3283	38.3283
38.3782	38.3782
38.428	38.428
38.4778	38.4778
38.5277	38.5277
38.5775	38.5775
38.6274	38.6274
38.6772	38.6772
38.7271	38.7271
38.7769	38.7769
38.8267	38.8267
38.8766	38.8766
38.9264	38.9264
38.9763	38.9763
39.0261	39.0261
39.0759	39.0759
39.1258	39.1258
39.1756	39.1756
39.2255	39.2255
39.2753	39.2753
39.3252	39.3252
39.375	39.375
39.4248	39.4248
39.4747	39.4747
39.5245	39.5245
39.5744	39.5744
39.6242	39.6242
39.674	39.674
39.7239	39.7239
39.7737	39.7737
39.8236	39.8236
39.8734	39.8734
39.9233	39.9233
39.9731	39.9731
40.0229	40.0229
40.0728	40.0728
40.1226	40.1226
40.1725	40.1725
40.2223	40.2223
40.2722	40.2722
40.322	40.322
40.3718	40.3718
40.4217	40.4217
40.4715	40.4715
40.5214	40.5214
40.5712	40.5712
40.621	40.621
40.6709	40.6709
40.7207	40.7207
40.7706	40.7706
40.8204	40.8204
40.8703	40.8703
40.9201	40.9201
40.9699	40.9699
41.0198	41.0198
41.0696	41.0696
41.1195	41.1195
41.1693	41.1693
41.2191	41.2191
41.269	41.269
41.3188	41.3188
41.3687	41.3687
41.4185	41.4185
41.4684	41.4684
41.5182	41.5182
41.568	41.568
41.6179	41.6179
41.6677	41.6677
41.7176	41.7176
41.7674	41.7674
41.8172	41.8172
41.8671	41.8671
41.9169	41.9169
41.9668	41.9668
42.0166	42.0166
42.0665	42.0665
42.1163	42.1163
42.1661	42.1661
42.216	42.216
42.2658	42.2658
42.3157	42.3157
42.3655	42.3655
42.4153	42.4153
42.4652	42.4652
42.515	42.515
42.5649	42.5649
42.6147	42.6147
42.6646	42.6646
42.7144	42.7144
42.7642	42.7642
42.8141	42.8141
42.8639	42.8639
42.9138	42.9138
42.9636	42.9636
43.0134	43.0134
43.0633	43.0633
43.1131	43.1131
43.163	43.163
43.2128	43.2128
43.2627	43.2627
43.3125	43.3125
43.3623	43.3623
43.4122	43.4122
43.462	43.462
43.5119	43.5119
43.5617	43.5617
43.6115	43.6115
43.6614	43.6614
43.7112	43.7112
43.7611	43.7611
43.8109	43.8109
43.8608	43.8608
43.9106	43.9106
43.9604	43.9604
44.0103	44.0103
44.0601	44.0601
44.11	44.11
44.1598	44.1598
44.2097	44.2097
44.2595	44.2595
44.3093	44.3093
44.3592	44.3592
44.409	44.409
44.4589	44.4589
44.5087	44.5087
44.5585	44.5585
44.6084	44.6084
44.6582	44.6582
44.7081	44.7081
44.7579	44.7579
44.8078	44.8078
44.8576	44.8576
44.9074	44.9074
44.9573	44.9573
45.0071	45.0071
45.057	45.057
45.1068	45.1068
45.1566	45.1566
45.2065	45.2065
45.2563	45.2563
45.3062	45.3062
45.356	45.356
45.4059	45.4059
45.4557	45.4557
45.5055	45.5055
45.5554	45.5554
45.6052	45.6052
45.6551	45.6551
45.7049	45.7049
45.7547	45.7547
45.8046	45.8046
45.8544	45.8544
45.9043	45.9043
45.9541	45.9541
46.004	46.004
46.0538	46.0538
46.1036	46.1036
46.1535	46.1535
46.2033	46.2033
46.2532	46.2532
46.303	46.303
46.3528	46.3528
46.4027	46.4027
46.4525	46.4525
46.5024	46.5024
46.5522	46.5522
46.6021	46.6021
46.6519	46.6519
46.7017	46.7017
46.7516	46.7516
46.8014	46.8014
46.8513	46.8513
46.9011	46.9011
46.9509	46.9509
47.0008	47.0008
47.0506	47.0506
47.1005	47.1005
47.1503	47.1503
47.2002	47.2002
47.25	47.25
47.2998	47.2998
47.3497	47.3497
47.3995	47.3995
47.4494	47.4494
47.4992	47.4992
47.549	47.549
47.5989	47.5989
47.6487	47.6487
47.6986	47.6986
47.7484	47.7484
47.7983	47.7983
47.8481	47.8481
47.8979	47.8979
47.9478	47.9478
47.9976	47.9976
48.0475	48.0475
48.0973	48.0973
48.1472	48.1472
48.197	48.197
48.2468	48.2468
48.2967	48.2967
48.3465	48.3465
48.3964	48.3964
48.4462	48.4462
48.496	48.496
48.5459	48.5459
48.5957	48.5957
48.6456	48.6456
48.6954	48.6954
48.7453	48.7453
48.7951	48.7951
48.8449	48.8449
48.8948	48.8948
48.9446	48.9446
48.9945	48.9945
49.0443	49.0443
49.0941	49.0941
49.144	49.144
49.1938	49.1938
49.2437	49.2437
49.2935	49.2935
49.3434	49.3434
49.3932	49.3932
49.443	49.443
49.4929	49.4929
49.5427	49.5427
49.5926	49.5926
49.6424	49.6424
49.6922	49.6922
49.7421	49.7421
49.7919	49.7919
49.8418	49.8418
49.8916	49.8916
49.9415	49.9415
49.9913	49.9913
50.0411	50.0411
50.091	50.091
50.1408	50.1408
50.1907	50.1907
50.2405	50.2405
50.2903	50.2903
50.3402	50.3402
50.39	50.39
50.4399	50.4399
50.4897	50.4897
50.5396	50.5396
50.5894	50.5894
50.6392	50.6392
50.6891	50.6891
50.7389	50.7389
50.7888	50.7888
50.8386	50.8386
50.8884	50.8884
50.9383	50.9383
50.9881	50.9881
51.038	51.038
51.0878	51.0878
51.1377	51.1377
51.1875	51.1875
51.2373	51.2373
51.2872	51.2872
51.337	51.337
51.3869	51.3869
51.4367	51.4367
51.4865	51.4865
51.5364	51.5364
51.5862	51.5862
51.6361	51.6361
51.6859	51.6859
51.7358	51.7358
51.7856	51.7856
51.8354	51.8354
51.8853	51.8853
51.9351	51.9351
51.985	51.985
52.0348	52.0348
52.0847	52.0847
52.1345	52.1345
52.1843	52.1843
52.2342	52.2342
52.284	52.284
52.3339	52.3339
52.3837	52.3837
52.4335	52.4335
52.4834	52.4834
52.5332	52.5332
52.5831	52.5831
52.6329	52.6329
52.6828	52.6828
52.7326	52.7326
52.7824	52.7824
52.8323	52.8323
52.8821	52.8821
52.932	52.932
52.9818	52.9818
53.0316	53.0316
53.0815	53.0815
53.1313	53.1313
53.1812	53.1812
53.231	53.231
53.2809	53.2809
53.3307	53.3307
53.3805	53.3805
53.4304	53.4304
53.4802	53.4802
53.5301	53.5301
53.5799	53.5799
53.6297	53.6297
53.6796	53.6796
53.7294	53.7294
53.7793	53.7793
53.8291	53.8291
53.879	53.879
53.9288	53.9288
53.9786	53.9786
54.0285	54.0285
54.0783	54.0783
54.1282	54.1282
54.178	54.178
54.2278	54.2278
54.2777	54.2777
54.3275	54.3275
54.3774	54.3774
54.4272	54.4272
54.4771	54.4771
54.5269	54.5269
54.5767	54.5767
54.6266	54.6266
54.6764	54.6764
54.7263	54.7263
54.7761	54.7761
54.8259	54.8259
54.8758	54.8758
54.9256	54.9256
54.9755	54.9755
55.0253	55.0253
55.0752	55.0752
55.125	55.125
55.1748	55.1748
55.2247	55.2247
55.2745	55.2745
55.3244	55.3244
55.3742	55.3742
55.424	55.424
55.4739	55.4739
55.5237	55.5237
55.5736	55.5736
55.6234	55.6234
55.6733	55.6733
55.7231	55.7231
55.7729	55.7729
55.8228	55.8228
55.8726	55.8726
55.9225	55.9225
55.9723	55.9723
56.0222	56.0222
56.072	56.072
56.1218	56.1218
56.1717	56.1717
56.2215	56.2215
56.2714	56.2714
56.3212	56.3212
56.371	56.371
56.4209	56.4209
56.4707	56.4707
56.5206	56.5206
56.5704	56.5704
56.6203	56.6203
56.6701	56.6701
56.7199	56.7199
56.7698	56.7698
56.8196	56.8196
56.8695	56.8695
56.9193	56.9193
56.9691	56.9691
57.019	57.019
57.0688	57.0688
57.1187	57.1187
57.1685	57.1685
57.2184	57.2184
57.2682	57.2682
57.318	57.318
57.3679	57.3679
57.4177	57.4177
57.4676	57.4676
57.5174	57.5174
57.5672	57.5672
57.6171	57.6171
57.6669	57.6669
57.7168	57.7168
57.7666	57.7666
57.8165	57.8165
57.8663	57.8663
57.9161	57.9161
57.966	57.966
58.0158	58.0158
58.0657	58.0657
58.1155	58.1155
58.1653	58.1653
58.2152	58.2152
58.265	58.265
58.3149	58.3149
58.3647	58.3647
58.4146	58.4146
58.4644	58.4644
58.5142	58.5142
58.5641	58.5641
58.6139	58.6139
58.6638	58.6638
58.7136	58.7136
58.7634	58.7634
58.8133	58.8133
58.8631	58.8631
58.913	58.913
58.9628	58.9628
59.0127	59.0127
59.0625	59.0625
59.1123	59.1123
59.1622	59.1622
59.212	59.212
59.2619	59.2619
59.3117	59.3117
59.3615	59.3615
59.4114	59.4114
59.4612	59.4612
59.5111	59.5111
59.5609	59.5609
59.6108	59.6108
59.6606	59.6606
59.7104	59.7104
59.7603	59.7603
59.8101	59.8101
59.86	59.86
59.9098	59.9098
59.9597	59.9597
60.0095	60.0095
60.0593	60.0593
60.1092	60.1092
60.159	60.159
60.2089	60.2089
60.2587	60.2587
60.3085	60.3085
60.3584	60.3584
60.4082	60.4082
60.4581	60.4581
60.5079	60.5079
60.5578	60.5578
60.6076	60.6076
60.6574	60.6574
60.7073	60.7073
60.7571	60.7571
60.807	60.807
60.8568	60.8568
60.9066	60.9066
60.9565	60.9565
61.0063	61.0063
61.0562	61.0562
61.106	61.106
61.1559	61.1559
61.2057	61.2057
61.2555	61.2555
61.3054	61.3054
61.3552	61.3552
61.4051	61.4051
61.4549	61.4549
61.5047	61.5047
61.5546	61.5546
61.6044	61.6044
61.6543	61.6543
61.7041	61.7041
61.754	61.754
61.8038	61.8038
61.8536	61.8536
61.9035	61.9035
61.9533	61.9533
62.0032	62.0032
62.053	62.053
62.1028	62.1028
62.1527	62.1527
62.2025	62.2025
62.2524	62.2524
62.3022	62.3022
62.3521	62.3521
62.4019	62.4019
62.4517	62.4517
62.5016	62.5016
62.5514	62.5514
62.6013	62.6013
62.6511	62.6511
62.7009	62.7009
62.7508	62.7508
62.8006	62.8006
62.8505	62.8505
62.9003	62.9003
62.9502	62.9502
63	63
63.0498	63.0498
63.0997	63.0997
63.1495	63.1495
63.1994	63.1994
63.2492	63.2492
63.299	63.299
63.3489	63.3489
63.3987	63.3987
63.4486	63.4486
63.4984	63.4984
63.5483	63.5483
63.5981	63.5981
63.6479	63.6479
63.6978	63.6978
63.7476	63.7476
63.7975	63.7975
63.8473	63.8473
63.8972	63.8972
63.947	63.947
63.9968	63.9968
64.0467	64.0467
64.0965	64.0965
64.1464	64.1464
64.1962	64.1962
64.246	64.246
64.2959	64.2959
64.3457	64.3457
64.3956	64.3956
64.4454	64.4454
64.4953	64.4953
64.5451	64.5451
64.5949	64.5949
64.6448	64.6448
64.6946	64.6946
64.7445	64.7445
64.7943	64.7943
64.8441	64.8441
64.894	64.894
64.9438	64.9438
64.9937	64.9937
65.0435	65.0435
65.0934	65.0934
65.1432	65.1432
65.193	65.193
65.2429	65.2429
65.2927	65.2927
65.3426	65.3426
65.3924	65.3924
65.4422	65.4422
65.4921	65.4921
65.5419	65.5419
65.5918	65.5918
65.6416	65.6416
65.6915	65.6915
65.7413	65.7413
65.7911	65.7911
65.841	65.841
65.8908	65.8908
65.9407	65.9407
65.9905	65.9905
66.0403	66.0403
66.0902	66.0902
66.14	66.14
66.1899	66.1899
66.2397	66.2397
66.2896	66.2896
66.3394	66.3394
66.3892	66.3892
66.4391	66.4391
66.4889	66.4889
66.5388	66.5388
66.5886	66.5886
66.6384	66.6384
66.6883	66.6883
66.7381	66.7381
66.788	66.788
66.8378	66.8378
66.8877	66.8877
66.9375	66.9375
66.9873	66.9873
67.0372	67.0372
67.087	67.087
67.1369	67.1369
67.1867	67.1867
67.2365	67.2365
67.2864	67.2864
67.3362	67.3362
67.3861	67.3861
67.4359	67.4359
67.4858	67.4858
67.5356	67.5356
67.5854	67.5854
67.6353	67.6353
67.6851	67.6851
67.735	67.735
67.7848	67.7848
67.8347	67.8347
67.8845	67.8845
67.9343	67.9343
67.9842	67.9842
68.034	68.034
68.0839	68.0839
68.1337	68.1337
68.1835	68.1835
68.2334	68.2334
68.2832	68.2832
68.3331	68.3331
68.3829	68.3829
68.4328	68.4328
68.4826	68.4826
68.5324	68.5324
68.5823	68.5823
68.6321	68.6321
68.682	68.682
68.7318	68.7318
68.7816	68.7816
68.8315	68.8315
68.8813	68.8813
68.9312	68.9312
68.981	68.981
69.0309	69.0309
69.0807	69.0807
69.1305	69.1305
69.1804	69.1804
69.2302	69.2302
69.2801	69.2801
69.3299	69.3299
69.3797	69.3797
69.4296	69.4296
69.4794	69.4794
69.5293	69.5293
69.5791	69.5791
69.629	69.629
69.6788	69.6788
69.7286	69.7286
69.7785	69.7785
69.8283	69.8283
69.8782	69.8782
69.928	69.928
69.9778	69.9778
70.0277	70.0277
70.0775	70.0775
70.1274	70.1274
70.1772	70.1772
70.2271	70.2271
70.2769	70.2769
70.3267	70.3267
70.3766	70.3766
70.4264	70.4264
70.4763	70.4763
70.5261	70.5261
70.5759	70.5759
70.6258	70.6258
70.6756	70.6756
70.7255	70.7255
70.7753	70.7753
70.8252	70.8252
70.875	70.875
70.9248	70.9248
70.9747	70.9747
71.0245	71.0245
71.0744	71.0744
71.1242	71.1242
71.174	71.174
71.2239	71.2239
71.2737	71.2737
71.3236	71.3236
71.3734	71.3734
71.4233	71.4233
71.4731	71.4731
71.5229	71.5229
71.5728	71.5728
71.6226	71.6226
71.6725	71.6725
71.7223	71.7223
71.7722	71.7722
71.822	71.822
71.8718	71.8718
71.9217	71.9217
71.9715	71.9715
72.0214	72.0214
72.0712	72.0712
72.121	72.121
72.1709	72.1709
72.2207	72.2207
72.2706	72.2706
72.3204	72.3204
72.3703	72.3703
72.4201	72.4201
72.4699	72.4699
72.5198	72.5198
72.5696	72.5696
72.6195	72.6195
72.6693	72.6693
72.7191	72.7191
72.769	72.769
72.8188	72.8188
72.8687	72.8687
72.9185	72.9185
72.9684	72.9684
73.0182	73.0182
73.068	73.068
73.1179	73.1179
73.1677	73.1677
73.2176	73.2176
73.2674	73.2674
73.3172	73.3172
73.3671	73.3671
73.4169	73.4169
73.4668	73.4668
73.5166	73.5166
73.5665	73.5665
73.6163	73.6163
73.6661	73.6661
73.716	73.716
73.7658	73.7658
73.8157	73.8157
73.8655	73.8655
73.9153	73.9153
73.9652	73.9652
74.015	74.015
74.0649	74.0649
74.1147	74.1147
74.1646	74.1646
74.2144	74.2144
74.2642	74.2642
74.3141	74.3141
74.3639	74.3639
74.4138	74.4138
74.4636	74.4636
74.5134	74.5134
74.5633	74.5633
74.6131	74.6131
74.663	74.663
74.7128	74.7128
74.7627	74.7627
74.8125	74.8125
74.8623	74.8623
74.9122	74.9122
74.962	74.962
75.0119	75.0119
75.0617	75.0617
75.1115	75.1115
75.1614	75.1614
75.2112	75.2112
75.2611	75.2611
75.3109	75.3109
75.3608	75.3608
75.4106	75.4106
75.4604	75.4604
75.5103	75.5103
75.5601	75.5601
75.61	75.61
75.6598	75.6598
75.7097	75.7097
75.7595	75.7595
75.8093	75.8093
75.8592	75.8592
75.909	75.909
75.9589	75.9589
76.0087	76.0087
76.0585	76.0585
76.1084	76.1084
76.1582	76.1582
76.2081	76.2081
76.2579	76.2579
76.3078	76.3078
76.3576	76.3576
76.4074	76.4074
76.4573	76.4573
76.5071	76.5071
76.557	76.557
76.6068	76.6068
76.6566	76.6566
76.7065	76.7065
76.7563	76.7563
76.8062	76.8062
76.856	76.856
76.9059	76.9059
76.9557	76.9557
77.0055	77.0055
77.0554	77.0554
77.1052	77.1052
77.1551	77.1551
77.2049	77.2049
77.2547	77.2547
77.3046	77.3046
77.3544	77.3544
77.4043	77.4043
77.4541	77.4541
77.504	77.504
77.5538	77.5538
77.6036	77.6036
77.6535	77.6535
77.7033	77.7033
77.7532	77.7532
77.803	77.803
77.8528	77.8528
77.9027	77.9027
77.9525	77.9525
78.0024	78.0024
78.0522	78.0522
78.1021	78.1021
78.1519	78.1519
78.2017	78.2017
78.2516	78.2516
78.3014	78.3014
78.3513	78.3513
78.4011	78.4011
78.4509	78.4509
78.5008	78.5008
78.5506	78.5506
78.6005	78.6005
78.6503	78.6503
78.7002	78.7002
78.75	78.75
78.7998	78.7998
78.8497	78.8497
78.8995	78.8995
78.9494	78.9494
78.9992	78.9992
79.049	79.049
79.0989	79.0989
79.1487	79.1487
79.1986	79.1986
79.2484	79.2484
79.2983	79.2983
79.3481	79.3481
79.3979	79.3979
79.4478	79.4478
79.4976	79.4976
79.5475	79.5475
79.5973	79.5973
79.6472	79.6472
79.697	79.697
79.7468	79.7468
79.7967	79.7967
79.8465	79.8465
79.8964	79.8964
79.9462	79.9462
79.996	79.996
80.0459	80.0459
80.0957	80.0957
80.1456	80.1456
80.1954	80.1954
80.2453	80.2453
80.2951	80.2951
80.3449	80.3449
80.3948	80.3948
80.4446	80.4446
80.4945	80.4945
80.5443	80.5443
80.5941	80.5941
80.644	80.644
80.6938	80.6938
80.7437	80.7437
80.7935	80.7935
80.8434	80.8434
80.8932	80.8932
80.943	80.943
80.9929	80.9929
81.0427	81.0427
81.0926	81.0926
81.1424	81.1424
81.1922	81.1922
81.2421	81.2421
81.2919	81.2919
81.3418	81.3418
81.3916	81.3916
81.4415	81.4415
81.4913	81.4913
81.5411	81.5411
81.591	81.591
81.6408	81.6408
81.6907	81.6907
81.7405	81.7405
81.7903	81.7903
81.8402	81.8402
81.89	81.89
81.9399	81.9399
81.9897	81.9897
82.0396	82.0396
82.0894	82.0894
82.1392	82.1392
82.1891	82.1891
82.2389	82.2389
82.2888	82.2888
82.3386	82.3386
82.3884	82.3884
82.4383	82.4383
82.4881	82.4881
82.538	82.538
82.5878	82.5878
82.6377	82.6377
82.6875	82.6875
82.7373	82.7373
82.7872	82.7872
82.837	82.837
82.8869	82.8869
82.9367	82.9367
82.9865	82.9865
83.0364	83.0364
83.0862	83.0862
83.1361	83.1361
83.1859	83.1859
83.2358	83.2358
83.2856	83.2856
83.3354	83.3354
83.3853	83.3853
83.4351	83.4351
83.485	83.485
83.5348	83.5348
83.5847	83.5847
83.6345	83.6345
83.6843	83.6843
83.7342	83.7342
83.784	83.784
83.8339	83.8339
83.8837	83.8837
83.9335	83.9335
83.9834	83.9834
84.0332	84.0332
84.0831	84.0831
84.1329	84.1329
84.1828	84.1828
84.2326	84.2326
84.2824	84.2824
84.3323	84.3323
84.3821	84.3821
84.432	84.432
84.4818	84.4818
84.5316	84.5316
84.5815	84.5815
84.6313	84.6313
84.6812	84.6812
84.731	84.731
84.7809	84.7809
84.8307	84.8307
84.8805	84.8805
84.9304	84.9304
84.9802	84.9802
85.0301	85.0301
85.0799	85.0799
85.1297	85.1297
85.1796	85.1796
85.2294	85.2294
85.2793	85.2793
85.3291	85.3291
85.379	85.379
85.4288	85.4288
85.4786	85.4786
85.5285	85.5285
85.5783	85.5783
85.6282	85.6282
85.678	85.678
85.7278	85.7278
85.7777	85.7777
85.8275	85.8275
85.8774	85.8774
85.9272	85.9272
85.9771	85.9771
86.0269	86.0269
86.0767	86.0767
86.1266	86.1266
86.1764	86.1764
86.2263	86.2263
86.2761	86.2761
86.3259	86.3259
86.3758	86.3758
86.4256	86.4256
86.4755	86.4755
86.5253	86.5253
86.5752	86.5752
86.625	86.625
86.6748	86.6748
86.7247	86.7247
86.7745	86.7745
86.8244	86.8244
86.8742	86.8742
86.924	86.924
86.9739	86.9739
87.0237	87.0237
87.0736	87.0736
87.1234	87.1234
87.1733	87.1733
87.2231	87.2231
87.2729	87.2729
87.3228	87.3228
87.3726	87.3726
87.4225	87.4225
87.4723	87.4723
87.5222	87.5222
87.572	87.572
87.6218	87.6218
87.6717	87.6717
87.7215	87.7215
87.7714	87.7714
87.8212	87.8212
87.871	87.871
87.9209	87.9209
87.9707	87.9707
88.0206	88.0206
88.0704	88.0704
88.1203	88.1203
88.1701	88.1701
88.2199	88.2199
88.2698	88.2698
88.3196	88.3196
88.3695	88.3695
88.4193	88.4193
88.4691	88.4691
88.519	88.519
88.5688	88.5688
88.6187	88.6187
88.6685	88.6685
88.7184	88.7184
88.7682	88.7682
88.818	88.818
88.8679	88.8679
88.9177	88.9177
88.9676	88.9676
89.0174	89.0174
89.0672	89.0672
89.1171	89.1171
89.1669	89.1669
89.2168	89.2168
89.2666	89.2666
89.3165	89.3165
89.3663	89.3663
89.4161	89.4161
89.466	89.466
89.5158	89.5158
89.5657	89.5657
89.6155	89.6155
89.6653	89.6653
89.7152	89.7152
89.765	89.765
89.8149	89.8149
89.8647	89.8647
89.9146	89.9146
89.9644	89.9644
90.0142	90.0142
90.0641	90.0641
90.1139	90.1139
90.1638	90.1638
90.2136	90.2136
90.2634	90.2634
90.3133	90.3133
90.3631	90.3631
90.413	90.413
90.4628	90.4628
90.5127	90.5127
90.5625	90.5625
90.6123	90.6123
90.6622	90.6622
90.712	90.712
90.7619	90.7619
90.8117	90.8117
90.8615	90.8615
90.9114	90.9114
90.9612	90.9612
91.0111	91.0111
91.0609	91.0609
91.1108	91.1108
91.1606	91.1606
91.2104	91.2104
91.2603	91.2603
91.3101	91.3101
91.36	91.36
91.4098	91.4098
91.4597	91.4597
91.5095	91.5095
91.5593	91.5593
91.6092	91.6092
91.659	91.659
91.7089	91.7089
91.7587	91.7587
91.8085	91.8085
91.8584	91.8584
91.9082	91.9082
91.9581	91.9581
92.0079	92.0079
92.0578	92.0578
92.1076	92.1076
92.1574	92.1574
92.2073	92.2073
92.2571	92.2571
92.307	92.307
92.3568	92.3568
92.4066	92.4066
92.4565	92.4565
92.5063	92.5063
92.5562	92.5562
92.606	92.606
92.6559	92.6559
92.7057	92.7057
92.7555	92.7555
92.8054	92.8054
92.8552	92.8552
92.9051	92.9051
92.9549	92.9549
93.0047	93.0047
93.0546	93.0546
93.1044	93.1044
93.1543	93.1543
93.2041	93.2041
93.254	93.254
93.3038	93.3038
93.3536	93.3536
93.4035	93.4035
93.4533	93.4533
93.5032	93.5032
93.553	93.553
93.6028	93.6028
93.6527	93.6527
93.7025	93.7025
93.7524	93.7524
93.8022	93.8022
93.8521	93.8521
93.9019	93.9019
93.9517	93.9517
94.0016	94.0016
94.0514	94.0514
94.1013	94.1013
94.1511	94.1511
94.2009	94.2009
94.2508	94.2508
94.3006	94.3006
94.3505	94.3505
94.4003	94.4003
94.4502	94.4502
94.5	94.5
94.5498	94.5498
94.5997	94.5997
94.6495	94.6495
94.6994	94.6994
94.7492	94.7492
94.799	94.799
94.8489	94.8489
94.8987	94.8987
94.9486	94.9486
94.9984	94.9984
95.0483	95.0483
95.0981	95.0981
95.1479	95.1479
95.1978	95.1978
95.2476	95.2476
95.2975	95.2975
95.3473	95.3473
95.3972	95.3972
95.447	95.447
95.4968	95.4968
95.5467	95.5467
95.5965	95.5965
95.6464	95.6464
95.6962	95.6962
95.746	95.746
95.7959	95.7959
95.8457	95.8457
95.8956	95.8956
95.9454	95.9454
95.9953	95.9953
96.0451	96.0451
96.0949	96.0949
96.1448	96.1448
96.1946	96.1946
96.2445	96.2445
96.2943	96.2943
96.3441	96.3441
96.394	96.394
96.4438	96.4438
96.4937	96.4937
96.5435	96.5435
96.5934	96.5934
96.6432	96.6432
96.693	96.693
96.7429	96.7429
96.7927	96.7927
96.8426	96.8426
96.8924	96.8924
96.9422	96.9422
96.9921	96.9921
97.0419	97.0419
97.0918	97.0918
97.1416	97.1416
97.1915	97.1915
97.2413	97.2413
97.2911	97.2911
97.341	97.341
97.3908	97.3908
97.4407	97.4407
97.4905	97.4905
97.5403	97.5403
97.5902	97.5902
97.64	97.64
97.6899	97.6899
97.7397	97.7397
97.7896	97.7896
97.8394	97.8394
97.8892	97.8892
97.9391	97.9391
97.9889	97.9889
98.0388	98.0388
98.0886	98.0886
98.1384	98.1384
98.1883	98.1883
98.2381	98.2381
98.288	98.288
98.3378	98.3378
98.3877	98.3877
98.4375	98.4375
98.4873	98.4873
98.5372	98.5372
98.587	98.587
98.6369	98.6369
98.6867	98.6867
98.7365	98.7365
98.7864	98.7864
98.8362	98.8362
98.8861	98.8861
98.9359	98.9359
98.9858	98.9858
99.0356	99.0356
99.0854	99.0854
99.1353	99.1353
99.1851	99.1851
99.235	99.235
99.2848	99.2848
99.3347	99.3347
99.3845	99.3845
99.4343	99.4343
99.4842	99.4842
99.534	99.534
99.5839	99.5839
99.6337	99.6337
[truncated: 7 more rows]

## Sheet: One sim - Mean fil length
2.7	2.7
45.0366	44.9389
88.0423	87.2414
121.575	122.201
141.02	143.329
146.164	142.151
141.654	134.915
134.686	133.67
133.492	131.612
138.176	134.938
139.439	136.783
140.791	141.595
141.525	140.651
143.401	139.682
143.636	141.821
140.905	145.863
141.065	146.664
139.544	148.813
142.238	145.183
144.877	142.557
148.114	143.993
147.208	141.358
145.785	142.783
143.341	144.788
145.201	144.796
144.261	144.059
143.875	143.219
147.255	143.831
146.946	145.495
145.856	149.251
145.943	149.301
146.5	149.129
143.287	143.914
142.692	139.885
142.706	136.391
142.467	136.867
142.343	138.915
141.199	144.021
144.839	144.661
144.996	145.017
145.427	145.919
144.72	145.248
146.127	143.054
144.345	140.2
143.827	139.505
143.957	141.212
143.414	140.577
141.485	139.057
141.33	138.364
143.554	140.349
146.803	138.31
148.677	137.839
144.21	141.157
142.552	142.287
140.375	141.166
144.589	146.757
144.384	145.807
144.59	144.686
144.743	144.314
144.942	142.329
145.748	139.299
142.114	137.383
139.933	137.077
141.084	139.259
141.227	140.725
142.183	140.937
140.734	140.187
144.175	141.592
143.243	142.834
142.564	139.77
143.538	139.464
143.22	141.431
142.519	143.866
139.576	146.836
140.596	144.477
140.474	141.45
141.526	141.407
141.966	143.643
143.5	142.058
144.322	142.115
142.084	144.02
142.834	145.409
137.454	145.001
136.644	145.125
136.034	146.335
140.322	142.717
137.297	143.178
141.621	143.875
141.614	142.311
142.062	143.201
142.726	142.109
142.872	142.856
139.707	144.444
140.328	145.61
139.588	144.691
140.849	141.184
142.39	143.638
147.253	141.719
146.773	140.171
146.991	139.26
144.446	140.388
141.794	142.58
140.445	143.787
144.855	141.549
149.09	140.858
149.016	137.15
144.833	137.074
142.501	139.762
140.651	143.002
142.573	144.531
142.636	142.693
145.816	143.968
143.229	145.242
139.918	146.38
142.76	143.881
143.222	141.729
144.662	142.915
141.93	145.572
140.755	145.793
141.101	145.148
142.56	144.894
147.092	141.242
148.485	147.35
147.501	145.292
147.395	144.968
146.657	144.323
144.949	141.836
141.158	143.496
141.566	146.192
144.107	144.571
145.012	143.203
143.885	140.258
142.079	137.177
142.301	138.735
143.847	142.274
143.455	141.64
144.623	138.752
140.362	138.084
139.874	140.986
143.008	143.149
142.577	144.291
141.62	141.127
141.603	141.147
142.248	138.994
143.821	138.381
145.329	141.527
143.648	141.46
143.071	142.099
143.7	141.732
144.736	142.044
145.08	139.07
145.946	141.948
146.085	141.324
141.937	141.399
142.293	140.361
140	139.06
142.991	138.845
143.803	137.706
143.207	135.918
142.505	139.717
145.184	144.675
145.489	145.623
147.592	145.717
142.391	143.863
143.636	145.605
141.906	143.259
141.805	139.808
143.654	141.137
141.123	141.556
142.049	141.593
142.93	143.006
139.759	142.706
140.692	143.114
139.188	141.773
143.138	144.351
140.017	146.043
139.624	144.925
142.584	145.126
145.117	144.217
147.715	143.403
143.568	140.636
143.669	141.884
144.319	141.256
143.068	141.562
141.331	142.699
142.288	142.824
142.669	142.7
140.628	141.245
142.968	143.815
147.119	142.672
147.604	142.751
146.448	143.603
143.401	142.736
144.209	141.274
141.581	140.928
142.609	138.435
141.227	140.314
143.726	140.136
143.921	143.64
141.505	147.027
141.929	147.314
143.604	147.427
143.752	143.728
140.478	145.186
142.216	141.046
143.65	144.064
146.197	142.188
146.202	141.522
147.406	140.275
146.516	138.871
145.419	142.67
145.271	140.478
144.967	139.935
146.511	141.345
144.222	142.431
146.785	143.384
150.478	146.682
149.255	145.858
146.379	143.901
143.179	144.94
141.896	142.671
143.787	140.939
144.446	143.746
143.76	143.682
142.654	141.322
144.699	139.966
144.732	142.173
145.078	140.46
145.925	138.312
145.98	138.633
146.333	138.365
144.085	141.532
143.318	143.532
144.391	146.296
143.743	144.432
144.761	143.345
144.207	140.023
141.173	146.061
139.914	143.935
140.313	142.292
142.285	139.805
141.699	141.975
142.809	143.57
140.646	142.197
144.562	142.695
143.186	144.07
141.364	147.974
141.834	145.647
142.185	144.037
145.797	142.664
148.887	144.531
149.037	142.583
144.419	141.661
143.043	140.703
146.085	141.68
147.112	143.099
144.649	145.526
144.936	142.89
145.796	146.498
143.471	146.054
141.88	145.09
142.009	143.501
144.256	141.672
145.03	138.131
143.941	142.207
141.874	143.307
143.016	144.403
144.352	144.42
142.319	142.036
146.015	135.97
142.646	136.983
142.21	137.535
141.477	139.513
143.54	141.59
141.488	142.946
142.033	143.8
145.323	142.461
147.106	139.019
142.681	139.52
142.999	140.988
145.515	138.884
145.962	138.74
146.822	140.031
145.482	140.563
141.949	143.562
137.802	146.763
142.844	142.313
144.632	139.616
142.695	143.179
140.132	142.146
140.523	141.012
146.005	141.238
145.098	141.894
146.149	143.787
140.108	143.309
139.091	141.084
142.444	139.389
141.487	138.801
144.882	139.121
141.495	138.328
142.275	137.451
142.904	139.866
144.668	143.926
145.906	143.829
144.385	139.379
145.112	139.249
141.021	138.681
139.504	142.068
140.076	140.318
141.468	141.631
140.788	142.953
143.507	143.279
141.145	141.765
141.838	142.093
142.218	141.686
145.704	142.716
145.26	145.441
143.967	144.427
144.735	143.145
148.716	143.743
149.393	143.641
145.269	145.737
147.511	146.457
148.565	146.397
147.819	146.744
145.471	146.48
143.451	146.411
139.368	146.2
138.591	144.908
139.371	142.614
140.283	141.96
143.535	143.29
138.499	145.804
140.119	150.329
141.118	149.518
142.454	144.204
142.189	143.125
144.593	147.026
144.692	149.394
142.284	146.788
143.253	144.623
144.898	141.516
144.375	141.94
143.971	142.109
143.976	143.631
145.055	145.111
147.498	145.081
146.031	144.384
143.179	144.91
143.598	143.945
144.214	143.67
144.003	144.691
143.776	145.231
148	146.799
141.696	145.29
144.514	143.046
144.501	140.424
144.353	139.357
140.797	143.322
143.564	146.597
146.35	147.481
146.231	148.255
146.041	147.321
145.567	142.149
142.409	139.15
145.621	137.893
143.938	140.406
143.228	143.344
145.227	143.066
146.742	145.176
146.941	143.566
144.259	141.104
143.264	142.22
140.898	140.684
142	143.536
139.956	144.248
141.603	147.226
142.931	145.393
139.519	144.74
138.632	143.093
141.685	140.591
142.481	139.953
145.702	145.632
146.786	146.137
143.904	148.61
141.585	147.249
141.513	146.022
137.857	142.987
140.766	142.691
143.01	144.698
144.136	146.92
146.618	146.478
143.602	145.034
142.98	144.061
141.961	145.69
140.704	144.899
143.951	143.896
142.271	140.804
143.717	142.569
144.623	142.113
145.381	139.754
143.487	141.047
144.334	140.255
146.509	140.469
146.238	140.98
143.745	141.799
144.836	141.666
142.845	142.06
141.42	145.182
141.27	143.905
137.429	139.913
137.686	139.01
140.57	141.45
143.139	143.224
146.002	145.968
142.828	146.712
142.213	142.679
142.99	139.149
143.473	138.647
142.68	141.698
139.608	141.669
139.8	142.86
137.316	139.505
141.295	138.851
142.663	140.236
141.955	141.753
142.565	143.611
142.328	145.248
141.435	145.174
138.574	145.539
138.765	143.965
139.128	146.02
143.249	146.931
147.788	143.541
144.935	145.506
146.202	145.31
145.238	144.161
143.828	145.665
142.906	144.505
144.202	141.905
146.29	141.616
141.695	141.071
141.734	140.578
141.533	140.793
146.83	136.86
144.853	138.565
144.772	141.592
146.057	144.196
146.679	142.1
144.635	144.772
142.314	143.519
145.436	141.222
146.026	140.214
142.619	141.871
143.078	143.362
144.802	147.732
147.076	148.585
147.884	145.097
145.893	142.648
145.263	143.962
145.834	144.334
147.372	142.89
147.143	144.507
145.744	145.351
140.943	143.636
142.505	142.81
142.905	141.964
145.016	142.102
145.478	144.545
144.384	143.152
142.594	142.669
141.64	146.056
141.667	145.475
141.689	143.415
139.517	143.104
143.22	142.686
143.573	140.674
144.73	142.823
143.403	141.196
141.906	142.019
141.857	142.478
140.369	141.074
142.166	142.69
142.362	142.082
142.628	141.8
145.021	142.051
142.435	142.849
142.454	142.135
144.792	140.444
147.638	141.962
145.935	140.579
145.856	141.156
145.317	144.313
145.876	143.741
145.025	143.041
146.99	145.061
146.615	145.073
143.715	145.091
144.404	145.693
146.425	143.35
148.932	142.687
150.54	141.637
146.408	143.543
145.619	145.278
143.193	140.926
140.534	142.869
146.885	142.938
146.31	142.849
141.52	146.993
139.808	147.258
142.342	145.388
141.268	143.385
142.476	145.182
146.607	147.141
149.018	145.324
144.633	144.646
142.229	143.24
139.742	143.817
140.811	140.539
141.317	140.656
142.544	141.564
144.524	142.854
145.002	140.667
144.136	140.418
142.189	140.554
143.196	143.202
140.893	144.195
139.518	144.721
136.604	146.89
139.017	146.805
141.151	143.926
142.229	143.517
142.971	144.554
144.133	143.452
144.054	142.144
145.424	142.764
142.675	142.888
145.012	141.76
145.074	141.11
144.068	141.425
142.64	140.094
140.729	142.664
140.803	142.966
144.5	145.002
143.849	146.232
144.955	145.977
142.685	146.579
141.576	146.267
139.529	142.482
140.045	139.752
141.578	142.397
145.427	144.724
149.517	144.345
149.386	145.686
148.981	144.165
149.469	145.562
147.356	143.338
140.187	144.781
142.21	140.774
143.244	139.311
141.571	142.688
144.367	145.651
142.904	145.511
142.339	143.461
143.313	142.988
141.262	144.226
142.616	144.431
143.859	147.958
141.619	150.74
137.335	146.637
139.456	141.954
139.907	139.703
137.731	138.498
139.818	141.732
140.588	142.229
143.597	140.789
144.604	140.544
145.219	138.1
147.066	139.277
145.123	142.419
142.884	143.031
142.737	139.895
143.203	140.168
143.218	143.325
141.354	144.922
141.691	144.279
144.648	141.952
143.621	141.466
141.72	143.857
143.865	142.586
144.067	143.346
147.728	142.528
140.502	143.406
139.199	145.101
141.473	144.659
141.546	145.62
143.463	144.254
143.604	145.218
143.487	141.553
140.735	143.142
142.459	145.722
143.406	146.149
146.499	144.645
144.868	144.68
140.091	146.836
142.119	144.094
140.85	145.923
140.018	144.25
141.58	143.033
145.977	145.041
151.232	144.018
149.371	146.476
145.332	145.599
143.719	144.539
143.652	145.918
142.65	146.159
144.291	147.616
140.751	145.997
139.764	147.713
139.366	148.187
140.114	148.999
144.395	146.663
141.863	144.342
140.563	142.51
141.14	146.611
144.755	145.563
143.76	143.573
144.058	144.336
144.821	141.434
149.072	143.838
149.394	142.234
145.785	142.835
145.502	145.674
143.54	143.49
144.428	144.109
148.42	142.578
146.715	141.458
145.875	141.801
144.45	145.026
145.676	143.086
145.943	141.318
142.715	141.661
142.409	139.278
145.95	138.959
149.728	138.093
148.837	140.192
145.664	138.25
144.821	143.405
143.726	141.857
143.983	141.827
143.749	142.825
141.682	144.559
140.956	146.978
141.241	146.556
141.304	145.848
141.917	145.322
140.679	144.741
141.875	144.583
145.778	144.887
145.363	144.903
146.972	142.068
148.002	140.518
144.157	141.147
143.648	141.057
144.067	139.89
142.549	140.141
144.675	140.687
142.898	141.704
142.298	146.484
142.851	149.312
143.599	149.468
143.138	144.253
143.986	141.676
141.275	145.448
140.65	146.998
141.582	145.11
142.971	141.303
140.625	143.051
138.95	143.244
138.884	143.024
142.981	143.471
141.956	145.11
144.263	144.439
142.25	143.976
143.198	143.328
142.638	139.341
143.188	140.792
143.903	142.131
144.49	142.894
146.363	142.96
143.618	140.105
142.644	142.061
143.697	140.84
143.654	139.182
144.155	140.4
145.173	145.681
141.377	142.831
143.643	140.844
147.052	141.669
144.921	144.01
144.591	144.718
144.978	141.112
144.547	140.416
141.871	138.837
138.148	140.166
139.726	141.298
144.384	143.471
146.855	145.003
144.211	143.255
143.722	143.979
143.753	145.321
143.813	144.977
142.68	144.128
143.937	143.63
143.17	144.35
141.505	142.042
137.554	140.176
139.171	139.956
141.016	139.948
144.489	141.808
143.465	143.447
140.521	144.111
140.95	143.977
144.483	143.637
141.696	143.887
142.148	142.229
141.577	144.133
142.615	144.161
145.839	143.065
143.936	142.297
142.796	144.18
142.833	143.498
142.744	140.051
144.846	140.217
141.954	141.314

## Sheet: One sim - SD fil length
2.22061e-15	2.22061e-15
17.8787	18.2766
35.7033	36.1496
58.817	57.6101
84.9215	84.1227
106.824	108.094
122.341	120.499
128.299	127.312
131.761	129.116
134.853	131.322
134.434	133.237
136.328	137.128
140.61	140.101
141.767	138.866
142.657	140.291
141.571	140.878
142.568	144.553
141.715	147.28
142.059	149.383
142.787	149.633
146.282	149.317
148.783	146.303
150.137	144.334
150.071	144.499
149.135	146.819
146.662	146.348
143.007	147.089
144.481	146.575
147.638	145.132
149.219	146.54
148.144	149.462
149.705	150.333
146.728	148.864
143.724	146.248
144.134	142.426
144.627	139.491
142.831	140.148
141.387	142.012
142.442	144.49
143.711	144.692
146.821	144.963
145.471	148.28
145.322	146.359
144.23	145.049
145.191	144.137
145.294	144.238
146.898	143.646
145.779	142.247
147.037	140.312
146.94	140.924
147.986	140.984
148.967	138.568
147.611	137.941
146.26	135.834
143.622	136.482
143.338	137.916
143.983	141.177
145.071	144.575
147.882	146.861
147.885	145.722
149.154	145.863
148.575	145.002
144.978	138.342
144.835	138.697
144.224	139.345
143.252	141.047
139.956	138.688
141.196	140.143
143.949	140.874
143.568	138.54
144.313	139.179
143.248	141.408
142.22	142.711
142.338	146.529
142.479	143.937
142.882	141.106
140.696	141.49
142.005	144.278
142.339	141.311
145.483	140.974
146.472	141.489
146.02	143.883
146.653	143.957
145.009	145.353
144.169	146.746
143.026	144.649
139.21	147.326
140.769	145.882
142.398	145.292
141.935	145.351
141.774	143.805
141.359	142.236
140.936	143.419
140.663	144.082
141.981	144.58
140.819	143.341
142.31	145.814
143.366	144.558
144.755	144.249
148.588	141.842
146.553	141.891
144.731	142.408
143.759	143.16
144.795	141.77
148.728	142.141
150.53	139.568
149.438	138.659
147.051	138.978
144.775	141.428
145.401	142.663
143.813	143.841
145.678	144.852
145.308	147.456
141.652	147.137
141.562	146.894
142.407	144.757
146.849	146.428
146.305	148.598
143.482	147.937
142.321	149.213
142.699	148.115
144.935	146.143
146.001	145.274
148.554	146.807
150.538	147.631
149.346	149.006
150.145	146.854
149.398	145.023
146.073	144.114
145.284	143.917
143.418	144.279
143.821	142.756
144.092	141.09
144.899	139.074
146.342	139.188
147.558	137.945
146.667	139.107
144.212	137.325
142.764	136.663
143.696	139.776
145.571	141.734
144.01	142.27
144.729	143.319
143.569	140.949
143.571	140.366
146.577	142.117
148.253	141.584
147.325	140.676
146.918	141.117
148.392	143.405
148.425	141.898
147.724	143.232
147.281	144.317
145.055	143.476
144.97	142.087
142.992	142.911
143.358	143.463
145.533	142.089
146.148	141.756
146.429	144.422
147.562	146.02
146.103	142.832
148.183	143.265
145.922	142.759
145.918	145.799
143.953	146.159
144.424	141.151
143.565	141.099
142.956	143.975
140.18	146.925
139.641	146.038
138.926	146.066
141.256	146.99
140.093	143.801
141.618	144.155
141.266	144.909
139.764	145.675
142.519	146.347
142.683	144.492
146.296	145.259
146.28	143.318
144.387	143.862
144.311	145.782
144.549	146.923
141.055	145.759
142.674	145.821
143.2	144.989
142.118	143.054
141.914	142.985
144.329	145.083
144.118	145.85
144.94	144.352
144.767	146.86
145.28	147.135
142.945	145.781
145.748	144.107
142.631	141.838
143.988	140.191
144.737	142.041
140.781	145.19
141.84	147.306
142.548	150.237
140.821	147.543
140.54	149.849
141.283	145.94
142.616	146.23
144.977	144.027
148.228	144.295
151.911	143.623
151.754	144.205
151.571	145.613
151.102	144.075
149.147	141.845
149.18	140.681
146.776	142.295
149.672	146.058
151.445	149.17
152.225	150.465
150.926	147.306
145.753	146.376
145.258	143.474
145.223	142.208
142.434	142.902
143.931	145.073
147.805	145.839
147.925	144.446
147.561	146.345
145.968	145.666
148.242	144.167
147.263	141.495
147.198	140.827
146.78	140.774
147.487	141.411
147.331	143.224
147.61	145.239
148.498	147.139
149.453	144.764
143.163	144.875
142.67	141.87
141.607	143.793
139.117	140.633
139.983	143.274
142.147	143.585
142.49	143.086
142.554	142.907
143.119	144.055
144.17	148.369
144.651	148.992
145.185	148.865
143.505	148.055
144.962	147.519
146.953	147.025
147.54	143.865
145.04	144.208
146.886	144.171
146.899	143.185
148.668	144.605
148.84	143.562
148.699	144.447
146.539	144.073
144.953	147.917
145.449	148.306
144.744	147.373
147.136	141.321
147.333	139.976
143.534	141.729
144.961	142.247
146.873	144.512
145.848	143.228
147.652	143.061
148.083	138.081
145.817	137.202
146.636	137.44
147.973	140.818
145.22	144.095
144.198	145.08
143.704	145.452
145.618	143.048
145.811	143.196
145.799	144.215
144.203	141.221
146.907	141.112
148.77	140.359
149.189	141.236
149.006	142.54
142.643	144.57
141.651	143.696
144.134	143.325
144.862	146.623
145.052	145.43
141.643	142.396
142.809	142.665
142.624	142.072
143.773	143.487
142.706	144.271
141.086	142.402
144.012	142.299
143.894	142.501
142.937	141.534
142.276	141.417
141.503	139.982
141.477	139.838
144.399	141.008
145.472	143.282
143.229	142.995
145.895	140.542
146.374	138.907
144.21	141.634
142.886	142.147
145.236	142.652
142.054	141.77
144.171	144.447
144.929	145.803
146.203	148.394
145.948	144.819
145.435	142.8
148.156	145.906
150.572	146.515
148.699	145.263
149.636	145.201
152.895	143.888
149.942	146.532
149.989	146.138
151.999	145.808
152.701	147.398
151.951	149.611
152.253	151.43
148.995	152.178
145.904	151.677
140.012	147.917
140.226	147.844
142.629	146.302
137.878	146.883
140.674	151.17
142.084	153.784
143.911	148.843
143.852	144.461
147.56	146.019
147.758	149.184
148.47	151.611
146.222	149.964
149.048	148.294
145.804	147.705
145.629	146.129
146.226	147.851
147.888	148.643
150.882	147.891
150.787	144.173
147.83	144.811
149.489	145.234
149.278	145.562
149.365	147.108
149.116	146.958
148.445	148.801
146.09	148.158
146.623	147.446
145.75	145.179
144.344	143.774
141.853	143.849
143.111	143.706
145.54	148.248
148.608	150.458
149.708	150.347
149.312	146.995
148.239	143.834
149.659	143.21
147.029	144.427
144.338	147.313
144.371	146.37
145.068	148.284
146.993	146.603
146.63	146.002
147.325	143.446
146.959	142.258
144.229	142.045
143.249	141.195
143.022	142.819
144.3	143.798
143.057	144.856
141.858	145.694
140.556	143.815
140.423	142.874
143.53	144.21
145.848	145.878
147.77	147
146.152	147.68
146.581	149.506
145.632	149.464
144.812	149.327
142.935	149.193
144.186	147.717
147.144	148.027
143.376	145.978
142.756	147.805
144.698	146.569
145.436	142.336
146.209	142.951
145.595	139.373
146.1	142.48
146.377	143.735
146.137	142.224
146.579	142.177
146.265	142.736
146.381	140.586
146.75	140.154
144.679	142.097
146.328	141.496
145.892	143.881
144.798	143.335
143.755	143.451
141.297	144.211
138.849	142.79
139.436	141.666
140.066	143.489
144.282	144.413
145.324	146.607
145.73	144.952
143.818	142.452
143.932	140.873
143.635	144.186
140.84	143.945
140.973	144.974
139.486	144.995
138.543	141.486
141.226	142.037
142.723	140.152
143.25	140.633
144.875	142.885
143.941	144.145
142.876	145.376
142.479	144.77
141.856	147.39
142.369	149.896
144.422	145.147
142.879	146.414
144.224	148.572
146.946	148.331
146.99	147.479
147.515	145.773
147.154	143.357
145.847	144.195
143.49	142.692
143.273	143.908
142.943	144.509
145.831	141.967
145.914	139.359
144.699	139.809
146.021	144.161
147.036	145.449
149.83	144.987
148.071	143.837
148.681	144.52
144.872	143.072
144.489	142.477
144.362	143.989
144.687	144.873
146.897	146.547
148.959	149.62
150.254	146.84
147.215	147.185
146.474	147.967
150.588	145.747
150.985	145.347
152.575	146.461
149.132	148.85
149.378	149.695
144.475	150.308
145.815	150.025
147.842	149.234
149.017	148.282
144.754	146.825
141.695	148.298
140.913	147.042
142.636	149.489
141.79	146.505
144.87	146.27
144.25	145.58
146.31	144.294
146.41	145.028
142.722	145.895
143.128	140.892
143.469	144.095
143.44	144.857
142.205	144.332
142.723	143.148
145.951	143.577
146.539	144.964
146.376	145.152
144.483	147.753
145.561	146.837
146.095	147.274
147.479	145.041
148.461	146.196
148.626	147.04
146.826	147.526
146.077	149.744
147.913	149.109
146.655	146.823
148.259	145.977
149.306	146.378
151.862	147.558
155.626	146.343
152.158	144.283
152.138	145.924
149.882	143.105
148.075	143.031
149.257	143.626
146.899	141.862
146.983	146.778
142.621	146.157
142.757	146.547
142.622	149.307
142.608	149.698
144.827	149.722
147.656	149.556
147.395	149.396
146.207	149.573
143.975	149.02
142.248	147.069
144.738	145.497
143.545	144.15
144.028	145.334
144.536	146.119
145.744	144.29
143.569	144.146
143.753	142.104
145.018	143.201
144.051	145
141.559	147.58
141.415	150.172
140.926	145.81
142.885	145.172
143.547	145.673
145.172	145.473
144.708	145.121
144.664	143.553
143.419	144.346
143.572	146.118
145.042	147.37
146.278	146.534
146.506	141.509
144.63	142.281
141.505	142.475
141.132	143.029
141.888	143.564
143.392	145.793
144.689	147.478
146.235	148.277
144.886	147.513
145.877	146.706
145.044	148.114
146.049	146.47
148.805	146.357
150.332	146.035
149.529	144.826
151.674	146.53
152.647	147.348
146.533	148.399
145.789	146.333
145.629	143.99
144.112	143.717
145.202	144.553
144.307	146.416
145.355	142.524
145.842	142.739
149.042	145.059
144.265	144.363
146.113	147.334
143.319	149.015
140.169	151.088
140.843	147.13
140.542	146.027
140.182	142.782
141.748	144.621
141.876	145.127
143.041	145.302
143.927	143.649
144.972	144.56
146.306	140.166
146.678	141.993
147.667	142.645
145.867	143.085
144.347	141.507
143.856	144.653
145.066	147.9
143.516	146.577
144.623	145.112
147.104	143.154
146.905	145.408
147.769	146.378
148.712	145.063
150.296	145.129
147.067	144.135
144.69	145.358
145.418	146.772
140.914	147.844
143.411	148.36
140.454	147.687
141.889	146.192
141.547	146.035
142.546	148.713
145.104	147.743
146.794	149.513
146.099	148.494
144.117	150.011
144.595	148.754
144.282	149.899
143.981	147.728
143.798	146.306
142.98	147.066
147.837	148.246
147.268	147.969
148.614	150.877
146.915	147.886
146.16	147.492
147.78	144.279
146.196	145.799
145.611	145.885
143.904	146.619
141.459	147.989
138.996	150.933
141.383	150.745
143.498	150.862
141.62	148.299
141.7	150.501
143.186	151.603
142.431	150.718
145.509	150.753
145.032	149.452
145.985	146.451
148.598	145.128
148.051	141.867
147.013	143.778
146.562	143.999
148.229	142.884
150.667	145.194
150.648	141.009
151.697	140.612
150.794	142.58
147.067	144.597
149.723	142.217
149.773	140.043
145.769	140.465
147.534	140.184
150.003	137.946
151.416	138.874
148.238	138.798
146.188	141.689
146.297	142.536
146.208	145.523
148.161	144.615
143.525	145.896
142.212	145.145
142.463	145.023
142.919	148.496
142.922	147.172
140.494	146.681
141.575	144.909
144.83	144.997
144.806	146.333
147.102	146.306
148.562	143.809
146.604	142.619
146.644	143.75
146.167	143.831
144.363	143.778
145.262	143.007
144.382	144.385
143.855	145.859
143.381	147.98
143.237	146.34
142.946	146.649
142.168	146.347
142.531	146.767
140.237	146.439
140.699	144.937
141.705	145.309
142.543	143.991
141.856	144.297
140.57	144.808
141.708	146.331
139.215	146.581
143.007	144.957
142.413	141.769
142.971	140.165
141.596	140.325
140.583	142.348
142.876	145.06
144.424	145.846
145.832	147.214
147.71	144.453
146.989	147.736
145.816	143.734
143.514	142.856
143.61	143.998
143.2	147.11
140.548	145.067
140.924	145.663
145.024	146.043
145.053	146.436
145.639	146.396
147.788	144.479
147.455	143.634
146.665	142.606
144.951	140.925
143.518	142.843
144.414	141.65
145.116	143.69
145.904	143.351
146.33	144.881
148.026	148.923
148.024	147.74
149.251	146.58
149.627	143.873
145.304	145.262
140.788	145.909
140.73	144.245
140.908	140.695
143.972	138.571
146.815	138.222
147.027	141.771
145.992	143.852
146.876	144.174
147.19	145.184
143.305	145.445
141.819	145.323
143.359	148.891
144.106	149.248
146.827	147.417
144.936	148.109
147.562	147.621
147.416	147.194
145.667	145.833
147.86	145.391
145.015	146.057

## Sheet: One sim - Time(s) - Fil length
8.65309e-05	8.65309e-05
0.1362	0.1362
0.272313	0.272313
0.408426	0.408426
0.544539	0.544539
0.680652	0.680652
0.816765	0.816765
0.952878	0.952878
1.08899	1.08899
1.2251	1.2251
1.36122	1.36122
1.49733	1.49733
1.63344	1.63344
1.76956	1.76956
1.90567	1.90567
2.04178	2.04178
2.1779	2.1779
2.31401	2.31401
2.45012	2.45012
2.58623	2.58623
2.72235	2.72235
2.85846	2.85846
2.99457	2.99457
3.13069	3.13069
3.2668	3.2668
3.40291	3.40291
3.53903	3.53903
3.67514	3.67514
3.81125	3.81125
3.94736	3.94736
4.08348	4.08348
4.21959	4.21959
4.3557	4.3557
4.49182	4.49182
4.62793	4.62793
4.76404	4.76404
4.90016	4.90016
5.03627	5.03627
5.17238	5.17238
5.30849	5.30849
5.44461	5.44461
5.58072	5.58072
5.71683	5.71683
5.85295	5.85295
5.98906	5.98906
6.12517	6.12517
6.26129	6.26129
6.3974	6.3974
6.53351	6.53351
6.66963	6.66963
6.80574	6.80574
6.94185	6.94185
7.07796	7.07796
7.21408	7.21408
7.35019	7.35019
7.4863	7.4863
7.62242	7.62242
7.75853	7.75853
7.89464	7.89464
8.03076	8.03076
8.16687	8.16687
8.30298	8.30298
8.43909	8.43909
8.57521	8.57521
8.71132	8.71132
8.84743	8.84743
8.98355	8.98355
9.11966	9.11966
9.25577	9.25577
9.39189	9.39189
9.528	9.528
9.66411	9.66411
9.80022	9.80022
9.93634	9.93634
10.0725	10.0725
10.2086	10.2086
10.3447	10.3447
10.4808	10.4808
10.6169	10.6169
10.753	10.753
10.8891	10.8891
11.0252	11.0252
11.1614	11.1614
11.2975	11.2975
11.4336	11.4336
11.5697	11.5697
11.7058	11.7058
11.8419	11.8419
11.978	11.978
12.1141	12.1141
12.2503	12.2503
12.3864	12.3864
12.5225	12.5225
12.6586	12.6586
12.7947	12.7947
12.9308	12.9308
13.0669	13.0669
13.2031	13.2031
13.3392	13.3392
13.4753	13.4753
13.6114	13.6114
13.7475	13.7475
13.8836	13.8836
14.0197	14.0197
14.1558	14.1558
14.292	14.292
14.4281	14.4281
14.5642	14.5642
14.7003	14.7003
14.8364	14.8364
14.9725	14.9725
15.1086	15.1086
15.2447	15.2447
15.3809	15.3809
15.517	15.517
15.6531	15.6531
15.7892	15.7892
15.9253	15.9253
16.0614	16.0614
16.1975	16.1975
16.3337	16.3337
16.4698	16.4698
16.6059	16.6059
16.742	16.742
16.8781	16.8781
17.0142	17.0142
17.1503	17.1503
17.2864	17.2864
17.4226	17.4226
17.5587	17.5587
17.6948	17.6948
17.8309	17.8309
17.967	17.967
18.1031	18.1031
18.2392	18.2392
18.3753	18.3753
18.5115	18.5115
18.6476	18.6476
18.7837	18.7837
18.9198	18.9198
19.0559	19.0559
19.192	19.192
19.3281	19.3281
19.4643	19.4643
19.6004	19.6004
19.7365	19.7365
19.8726	19.8726
20.0087	20.0087
20.1448	20.1448
20.2809	20.2809
20.417	20.417
20.5532	20.5532
20.6893	20.6893
20.8254	20.8254
20.9615	20.9615
21.0976	21.0976
21.2337	21.2337
21.3698	21.3698
21.5059	21.5059
21.6421	21.6421
21.7782	21.7782
21.9143	21.9143
22.0504	22.0504
22.1865	22.1865
22.3226	22.3226
22.4587	22.4587
22.5948	22.5948
22.731	22.731
22.8671	22.8671
23.0032	23.0032
23.1393	23.1393
23.2754	23.2754
23.4115	23.4115
23.5476	23.5476
23.6838	23.6838
23.8199	23.8199
23.956	23.956
24.0921	24.0921
24.2282	24.2282
24.3643	24.3643
24.5004	24.5004
24.6365	24.6365
24.7727	24.7727
24.9088	24.9088
25.0449	25.0449
25.181	25.181
25.3171	25.3171
25.4532	25.4532
25.5893	25.5893
25.7254	25.7254
25.8616	25.8616
25.9977	25.9977
26.1338	26.1338
26.2699	26.2699
26.406	26.406
26.5421	26.5421
26.6782	26.6782
26.8144	26.8144
26.9505	26.9505
27.0866	27.0866
27.2227	27.2227
27.3588	27.3588
27.4949	27.4949
27.631	27.631
27.7671	27.7671
27.9033	27.9033
28.0394	28.0394
28.1755	28.1755
28.3116	28.3116
28.4477	28.4477
28.5838	28.5838
28.7199	28.7199
28.856	28.856
28.9922	28.9922
29.1283	29.1283
29.2644	29.2644
29.4005	29.4005
29.5366	29.5366
29.6727	29.6727
29.8088	29.8088
29.945	29.945
30.0811	30.0811
30.2172	30.2172
30.3533	30.3533
30.4894	30.4894
30.6255	30.6255
30.7616	30.7616
30.8977	30.8977
31.0339	31.0339
31.17	31.17
31.3061	31.3061
31.4422	31.4422
31.5783	31.5783
31.7144	31.7144
31.8505	31.8505
31.9866	31.9866
32.1228	32.1228
32.2589	32.2589
32.395	32.395
32.5311	32.5311
32.6672	32.6672
32.8033	32.8033
32.9394	32.9394
33.0756	33.0756
33.2117	33.2117
33.3478	33.3478
33.4839	33.4839
33.62	33.62
33.7561	33.7561
33.8922	33.8922
34.0283	34.0283
34.1645	34.1645
34.3006	34.3006
34.4367	34.4367
34.5728	34.5728
34.7089	34.7089
34.845	34.845
34.9811	34.9811
35.1172	35.1172
35.2534	35.2534
35.3895	35.3895
35.5256	35.5256
35.6617	35.6617
35.7978	35.7978
35.9339	35.9339
36.07	36.07
36.2062	36.2062
36.3423	36.3423
36.4784	36.4784
36.6145	36.6145
36.7506	36.7506
36.8867	36.8867
37.0228	37.0228
37.1589	37.1589
37.2951	37.2951
37.4312	37.4312
37.5673	37.5673
37.7034	37.7034
37.8395	37.8395
37.9756	37.9756
38.1117	38.1117
38.2478	38.2478
38.384	38.384
38.5201	38.5201
38.6562	38.6562
38.7923	38.7923
38.9284	38.9284
39.0645	39.0645
39.2006	39.2006
39.3368	39.3368
39.4729	39.4729
39.609	39.609
39.7451	39.7451
39.8812	39.8812
40.0173	40.0173
40.1534	40.1534
40.2895	40.2895
40.4257	40.4257
40.5618	40.5618
40.6979	40.6979
40.834	40.834
40.9701	40.9701
41.1062	41.1062
41.2423	41.2423
41.3784	41.3784
41.5146	41.5146
41.6507	41.6507
41.7868	41.7868
41.9229	41.9229
42.059	42.059
42.1951	42.1951
42.3312	42.3312
42.4674	42.4674
42.6035	42.6035
42.7396	42.7396
42.8757	42.8757
43.0118	43.0118
43.1479	43.1479
43.284	43.284
43.4201	43.4201
43.5563	43.5563
43.6924	43.6924
43.8285	43.8285
43.9646	43.9646
44.1007	44.1007
44.2368	44.2368
44.3729	44.3729
44.509	44.509
44.6452	44.6452
44.7813	44.7813
44.9174	44.9174
45.0535	45.0535
45.1896	45.1896
45.3257	45.3257
45.4618	45.4618
45.598	45.598
45.7341	45.7341
45.8702	45.8702
46.0063	46.0063
46.1424	46.1424
46.2785	46.2785
46.4146	46.4146
46.5507	46.5507
46.6869	46.6869
46.823	46.823
46.9591	46.9591
47.0952	47.0952
47.2313	47.2313
47.3674	47.3674
47.5035	47.5035
47.6396	47.6396
47.7758	47.7758
47.9119	47.9119
48.048	48.048
48.1841	48.1841
48.3202	48.3202
48.4563	48.4563
48.5924	48.5924
48.7286	48.7286
48.8647	48.8647
49.0008	49.0008
49.1369	49.1369
49.273	49.273
49.4091	49.4091
49.5452	49.5452
49.6813	49.6813
49.8175	49.8175
49.9536	49.9536
50.0897	50.0897
50.2258	50.2258
50.3619	50.3619
50.498	50.498
50.6341	50.6341
50.7702	50.7702
50.9064	50.9064
51.0425	51.0425
51.1786	51.1786
51.3147	51.3147
51.4508	51.4508
51.5869	51.5869
51.723	51.723
51.8592	51.8592
51.9953	51.9953
52.1314	52.1314
52.2675	52.2675
52.4036	52.4036
52.5397	52.5397
52.6758	52.6758
52.8119	52.8119
52.9481	52.9481
53.0842	53.0842
53.2203	53.2203
53.3564	53.3564
53.4925	53.4925
53.6286	53.6286
53.7647	53.7647
53.9008	53.9008
54.037	54.037
54.1731	54.1731
54.3092	54.3092
54.4453	54.4453
54.5814	54.5814
54.7175	54.7175
54.8536	54.8536
54.9898	54.9898
55.1259	55.1259
55.262	55.262
55.3981	55.3981
55.5342	55.5342
55.6703	55.6703
55.8064	55.8064
55.9425	55.9425
56.0787	56.0787
56.2148	56.2148
56.3509	56.3509
56.487	56.487
56.6231	56.6231
56.7592	56.7592
56.8953	56.8953
57.0314	57.0314
57.1676	57.1676
57.3037	57.3037
57.4398	57.4398
57.5759	57.5759
57.712	57.712
57.8481	57.8481
57.9842	57.9842
58.1204	58.1204
58.2565	58.2565
58.3926	58.3926
58.5287	58.5287
58.6648	58.6648
58.8009	58.8009
58.937	58.937
59.0731	59.0731
59.2093	59.2093
59.3454	59.3454
59.4815	59.4815
59.6176	59.6176
59.7537	59.7537
59.8898	59.8898
60.0259	60.0259
60.162	60.162
60.2982	60.2982
60.4343	60.4343
60.5704	60.5704
60.7065	60.7065
60.8426	60.8426
60.9787	60.9787
61.1148	61.1148
61.251	61.251
61.3871	61.3871
61.5232	61.5232
61.6593	61.6593
61.7954	61.7954
61.9315	61.9315
62.0676	62.0676
62.2037	62.2037
62.3399	62.3399
62.476	62.476
62.6121	62.6121
62.7482	62.7482
62.8843	62.8843
63.0204	63.0204
63.1565	63.1565
63.2926	63.2926
63.4288	63.4288
63.5649	63.5649
63.701	63.701
63.8371	63.8371
63.9732	63.9732
64.1093	64.1093
64.2454	64.2454
64.3816	64.3816
64.5177	64.5177
64.6538	64.6538
64.7899	64.7899
64.926	64.926
65.0621	65.0621
65.1982	65.1982
65.3343	65.3343
65.4705	65.4705
65.6066	65.6066
65.7427	65.7427
65.8788	65.8788
66.0149	66.0149
66.151	66.151
66.2871	66.2871
66.4232	66.4232
66.5594	66.5594
66.6955	66.6955
66.8316	66.8316
66.9677	66.9677
67.1038	67.1038
67.2399	67.2399
67.376	67.376
67.5122	67.5122
67.6483	67.6483
67.7844	67.7844
67.9205	67.9205
68.0566	68.0566
68.1927	68.1927
68.3288	68.3288
68.4649	68.4649
68.6011	68.6011
68.7372	68.7372
68.8733	68.8733
69.0094	69.0094
69.1455	69.1455
69.2816	69.2816
69.4177	69.4177
69.5538	69.5538
69.69	69.69
69.8261	69.8261
69.9622	69.9622
70.0983	70.0983
70.2344	70.2344
70.3705	70.3705
70.5066	70.5066
70.6427	70.6427
70.7789	70.7789
70.915	70.915
71.0511	71.0511
71.1872	71.1872
71.3233	71.3233
71.4594	71.4594
71.5955	71.5955
71.7317	71.7317
71.8678	71.8678
72.0039	72.0039
72.14	72.14
72.2761	72.2761
72.4122	72.4122
72.5483	72.5483
72.6844	72.6844
72.8206	72.8206
72.9567	72.9567
73.0928	73.0928
73.2289	73.2289
73.365	73.365
73.5011	73.5011
73.6372	73.6372
73.7733	73.7733
73.9095	73.9095
74.0456	74.0456
74.1817	74.1817
74.3178	74.3178
74.4539	74.4539
74.59	74.59
74.7261	74.7261
74.8623	74.8623
74.9984	74.9984
75.1345	75.1345
75.2706	75.2706
75.4067	75.4067
75.5428	75.5428
75.6789	75.6789
75.815	75.815
75.9512	75.9512
76.0873	76.0873
76.2234	76.2234
76.3595	76.3595
76.4956	76.4956
76.6317	76.6317
76.7678	76.7678
76.9039	76.9039
77.0401	77.0401
77.1762	77.1762
77.3123	77.3123
77.4484	77.4484
77.5845	77.5845
77.7206	77.7206
77.8567	77.8567
77.9929	77.9929
78.129	78.129
78.2651	78.2651
78.4012	78.4012
78.5373	78.5373
78.6734	78.6734
78.8095	78.8095
78.9456	78.9456
79.0818	79.0818
79.2179	79.2179
79.354	79.354
79.4901	79.4901
79.6262	79.6262
79.7623	79.7623
79.8984	79.8984
80.0345	80.0345
80.1707	80.1707
80.3068	80.3068
80.4429	80.4429
80.579	80.579
80.7151	80.7151
80.8512	80.8512
80.9873	80.9873
81.1235	81.1235
81.2596	81.2596
81.3957	81.3957
81.5318	81.5318
81.6679	81.6679
81.804	81.804
81.9401	81.9401
82.0762	82.0762
82.2124	82.2124
82.3485	82.3485
82.4846	82.4846
82.6207	82.6207
82.7568	82.7568
82.8929	82.8929
83.029	83.029
83.1651	83.1651
83.3013	83.3013
83.4374	83.4374
83.5735	83.5735
83.7096	83.7096
83.8457	83.8457
83.9818	83.9818
84.1179	84.1179
84.2541	84.2541
84.3902	84.3902
84.5263	84.5263
84.6624	84.6624
84.7985	84.7985
84.9346	84.9346
85.0707	85.0707
85.2068	85.2068
85.343	85.343
85.4791	85.4791
85.6152	85.6152
85.7513	85.7513
85.8874	85.8874
86.0235	86.0235
86.1596	86.1596
86.2957	86.2957
86.4319	86.4319
86.568	86.568
86.7041	86.7041
86.8402	86.8402
86.9763	86.9763
87.1124	87.1124
87.2485	87.2485
87.3847	87.3847
87.5208	87.5208
87.6569	87.6569
87.793	87.793
87.9291	87.9291
88.0652	88.0652
88.2013	88.2013
88.3374	88.3374
88.4736	88.4736
88.6097	88.6097
88.7458	88.7458
88.8819	88.8819
89.018	89.018
89.1541	89.1541
89.2902	89.2902
89.4263	89.4263
89.5625	89.5625
89.6986	89.6986
89.8347	89.8347
89.9708	89.9708
90.1069	90.1069
90.243	90.243
90.3791	90.3791
90.5153	90.5153
90.6514	90.6514
90.7875	90.7875
90.9236	90.9236
91.0597	91.0597
91.1958	91.1958
91.3319	91.3319
91.468	91.468
91.6042	91.6042
91.7403	91.7403
91.8764	91.8764
92.0125	92.0125
92.1486	92.1486
92.2847	92.2847
92.4208	92.4208
92.5569	92.5569
92.6931	92.6931
92.8292	92.8292
92.9653	92.9653
93.1014	93.1014
93.2375	93.2375
93.3736	93.3736
93.5097	93.5097
93.6459	93.6459
93.782	93.782
93.9181	93.9181
94.0542	94.0542
94.1903	94.1903
94.3264	94.3264
94.4625	94.4625
94.5986	94.5986
94.7348	94.7348
94.8709	94.8709
95.007	95.007
95.1431	95.1431
95.2792	95.2792
95.4153	95.4153
95.5514	95.5514
95.6875	95.6875
95.8237	95.8237
95.9598	95.9598
96.0959	96.0959
96.232	96.232
96.3681	96.3681
96.5042	96.5042
96.6403	96.6403
96.7765	96.7765
96.9126	96.9126
97.0487	97.0487
97.1848	97.1848
97.3209	97.3209
97.457	97.457
97.5931	97.5931
97.7292	97.7292
97.8654	97.8654
98.0015	98.0015
98.1376	98.1376
98.2737	98.2737
98.4098	98.4098
98.5459	98.5459
98.682	98.682
98.8181	98.8181
98.9543	98.9543
99.0904	99.0904
99.2265	99.2265
99.3626	99.3626
99.4987	99.4987
99.6348	99.6348
99.7709	99.7709
99.9071	99.9071

## Sheet: One sim - Mean fil angle
24.6282	27.9798
25.0588	71.5311
23.0051	73.4945
60.7305	46.6861
47.2876	59.0311
47.4052	43.0987
54.3017	43.4059
45.0967	58.1509
45.2543	57.7996
45.5664	61.9804
45.7486	61.611
45.3589	44.6322
44.7973	44.4109
49.0674	44.0268
48.8085	43.7829
48.6216	43.6232
41.6667	44.9045
41.503	44.8636
42.913	43.519
42.7029	44.5541
39.7493	44.325
39.8365	44.1597
38.5173	43.7698
42.8144	43.7264
43.0728	39.4727
50.8219	44.0735
43.3118	44.0534
43.1625	44.0176
39.157	44.4781
39.0107	39.9264
41.4866	39.7137
41.4748	39.7138
41.2685	39.6962
42.9525	39.4462
36.5155	39.4404
47.0731	39.3388
46.7418	39.4545
42.3558	39.7791
42.9183	40.0859
46.578	45.2471
46.6506	44.7537
43.2357	43.4093
37.4462	40.5573
42.9909	43.5162
43.7733	38.1686
43.7448	38.0276
43.7027	43.5586
43.7483	43.6913
41.3514	42.1786
41.1762	40.1902
42.5711	42.1621
38.0627	42.105
43.0511	41.8509
45.3378	41.7141
43.5942	41.5478
43.7498	41.4995
43.8642	37.9058
43.8576	41.3857
41.1976	40.2947
41.012	40.2187
40.8928	40.0353
40.948	40.2587
40.9707	40.6794
42.7815	40.8686
42.548	40.836
42.4723	40.817
42.6316	40.7302
40.5976	40.6161
35.5461	44.6232
41.1	44.9333
41.0188	39.5289
40.6939	39.6746
39.1517	39.9587
39.749	40.141
40.1775	40.2007
40.513	40.8995
40.6721	40.8017
40.7086	45.3832
40.6038	45.2589
43.4275	42.0422
43.5076	41.8205
43.4361	41.6327
43.4888	41.6283
39.7035	41.8621
39.7661	43.1862
43.9859	43.5466
39.217	43.741
39.1754	40.1512
39.4003	43.4186
39.4273	42.1401
39.4846	38.8018
39.6551	38.7398
40.0013	40.0807
43.9914	40.6657
43.9072	40.22
43.8282	47.0693
43.9228	47.3679
43.9522	47.4457
40.2985	47.362
40.2055	39.6754
40.2323	41.7266
40.4734	42.0119
40.5904	42.2704
44.1893	42.3845
40.3084	43.8302
44.0754	42.5386
43.6913	42.4001
43.9048	42.1879
36.9123	41.7115
44.149	41.4435
44.2654	41.2342
45.6429	41.1847
45.7316	43.8427
40.2249	41.124
40.1653	41.0977
40.0169	41.2271
40.0306	44.9352
40.0279	44.7094
40.0166	37.7661
39.9863	37.6955
45.4315	41.0271
37.7425	41.2227
38.3414	41.1368
45.4315	41.2562
41.8806	41.403
41.5699	41.513
41.3186	39.3465
42.4638	39.2355
35.5738	39.2355
35.5522	43.5142
35.5356	39.4115
35.8179	39.3436
37.9654	37.4187
46.9213	37.3031
46.8538	37.0591
46.9579	37.0478
43.707	37.3519
43.9741	40.6363
43.547	40.8583
43.5891	40.8619
43.7095	40.7173
43.9257	40.3754
44.1153	40.394
44.3694	42.913
44.4905	42.6465
41.9339	42.5085
41.657	42.475
47.458	42.396
47.1914	42.5728
40.0043	40.0318
40.0057	40.2223
40.0057	40.3267
40.0057	40.3924
40.0068	40.6798
41.3167	40.8993
41.3928	43.093
41.349	42.9952
41.4934	43.8858
41.5789	39.7379
40.7576	39.8333
40.6968	41.3176
47.118	40.2557
47.4946	40.0643
47.51	39.8013
47.2893	40.5365
38.1799	40.6187
38.2104	41.7488
38.195	38.627
38.2222	38.6631
38.3159	41.6248
43.8382	41.5471
43.9376	41.5007
43.7667	40.3581
39.301	40.7379
37.2993	40.9333
37.3689	41.6453
39.5972	41.7523
39.635	44.591
39.9936	39.0649
37.1978	38.9587
37.2503	38.8058
40.1784	38.6163
40.3052	38.339
40.3024	38.486
41.111	40.4339
41.1226	41.4673
40.3481	42.7699
40.438	42.582
44.2804	42.736
44.4965	42.9408
44.5705	43.1569
47.1388	45.5716
40.0386	45.5673
50.7224	40.8281
50.5483	40.9059
42.8718	44.7545
42.8125	42.3066
53.2554	42.2833
48.6514	42.2616
48.5744	37.4932
39.1695	37.7392
39.2268	37.991
49.7036	43.0661
50.0185	43.0248
42.3318	42.9231
42.4077	42.6151
48.581	42.1783
48.1149	41.8766
47.8998	41.8204
39.6609	41.6553
39.8182	40.1605
39.874	40.2401
39.9455	40.6777
41.9237	41.1594
41.6819	42.7891
40.9017	43.0846
40.7039	43.1966
40.5852	44.4859
38.3411	44.7595
38.2718	45.1122
41.717	45.2268
41.7464	39.1761
41.6667	38.9631
41.4216	42.3965
41.3539	42.2236
41.225	42.104
41.0224	45.7274
37.6041	42.0854
39.7488	42.0839
39.9613	42.0176
40.0495	41.9238
40.1889	41.9543
43.3469	42.0176
43.463	42.132
41.6947	42.8619
41.6018	42.9868
41.6471	42.7567
44.3622	42.4293
44.4544	42.1898
44.3622	44.0783
44.0676	43.9999
43.9457	39.9475
44.0067	39.7741
43.9636	39.4467
39.049	39.8375
40.7758	39.2558
39.6463	39.9996
37.9216	40.0956
38.0381	40.2334
37.9376	40.2653
37.884	40.3371
37.8191	40.5317
37.7971	40.8579
40.2249	41.1424
40.2796	41.3206
46.3368	41.3463
46.1224	41.4721
47.9194	41.4196
44.1438	41.5446
44.0815	44.8128
40.0487	44.9393
39.9905	45.1592
39.9908	44.7016
40.0478	44.5972
40.1463	44.5497
39.6751	41.2401
45.6306	38.9962
39.7952	38.7217
39.7388	38.6044
40.1325	43.5196
40.39	43.6399
38.7799	43.7561
38.6029	39.2511
38.3518	39.2151
38.2979	39.0013
38.3572	39.0692
43.8096	44.4704
39.4181	44.471
39.1744	44.647
41.5641	44.3866
41.4741	44.3838
39.2062	40.8818
41.3907	43.0542
47.1577	38.8239
47.3797	38.8239
38.5365	38.8905
40.3148	37.6733
43.5826	42.9609
43.8097	41.6374
44.0494	41.779
48.5172	42.0625
48.1186	42.2471
47.7687	42.0933
39.0656	41.798
39.1979	41.4262
39.0829	41.397
43.2609	41.4625
43.2357	38.5576
43.2361	38.4922
43.2974	43.4145
43.1499	43.8285
38.2962	42.6918
42.2743	40.2857
42.3823	40.2546
42.4817	40.1417
42.5086	40.6838
42.2351	39.0347
41.3879	39.1115
40.6055	39.0308
40.3697	38.9876
37.979	43.6803
38.0263	43.4761
38.077	40.5894
38.7306	39.0156
38.3121	38.9345
38.4651	38.848
38.4425	38.7966
38.3089	39.3317
44.4971	39.5375
38.0282	39.9524
37.9339	40.4615
36.2941	40.6556
36.1789	40.7299
43.9715	40.5566
43.9603	40.4442
44.1806	40.4141
45.0652	42.7429
45.2083	40.731
45.2842	40.5717
41.9261	40.5577
42.6842	39.0637
42.7554	43.6638
42.9012	41.1685
42.7554	42.8241
42.5655	41.2939
39.2935	41.2392
39.2092	41.1041
42.2128	40.3545
42.0562	39.8859
42.5528	38.8285
42.3402	39.5569
42.3709	39.1752
42.5059	41.6193
39.1501	41.6075
36.9254	41.7644
47.0743	42.2078
47.3949	42.5796
43.3531	42.3189
38.1599	42.2773
37.9669	39.4911
37.9338	44.8238
39.1497	43.381
39.3127	39.2687
39.4445	39.0706
39.5074	39.0681
39.6192	39.097
39.6598	40.6079
40.4735	41.6475
40.269	38.5569
39.1081	38.3394
39.2037	38.5828
37.9843	40.3636
37.8244	42.1775
37.5935	38.5098
37.3567	38.3603
36.588	41.9697
42.5568	42.1886
42.7245	42.3007
43.9481	40.5413
43.0275	40.5556
45.2424	40.5439
43.0227	40.5541
43.2554	40.5908
46.9716	44.2844
47.1267	44.6841
39.3871	44.8935
39.3809	39.1035
50.7473	39.0975
42.0438	43.0334
44.1893	38.1445
43.9521	41.2295
38.9756	41.3409
40.0129	42.372
39.8266	42.6336
39.5031	38.1458
39.4749	38.2094
39.1796	38.2276
45.6444	38.1135
43.0294	39.0673
40.7839	39.038
40.7263	47.0978
40.3921	46.6888
40.4502	39.9821
40.515	39.8456
40.5147	39.9345
40.6203	40.1511
40.8389	40.4373
43.711	40.3538
38.2317	40.0561
38.0752	39.5882
40.581	39.342
37.6903	39.3781
37.4518	38.3607
36.584	45.0425
36.6278	44.9217
38.7128	41.2592
41.8841	41.376
41.7061	41.5196
41.4312	41.6265
38.354	42.0381
38.2796	42.1481
38.1958	41.9132
38.4299	41.7363
39.0543	41.5796
38.9948	41.6423
38.6136	41.7584
38.416	42.8428
37.0336	41.1058
37.1846	40.9247
41.5077	38.7904
36.5699	38.9473
41.6956	38.9864
42.7208	39.0362
37.6191	44.4181
37.5102	45.5725
41.3954	41.326
41.625	42.9779
41.8359	43.0107
37.944	43.1621
41.486	43.289
40.3209	43.3197
40.4318	43.3197
40.5097	41.7404
40.2331	41.5884
41.8229	40.7047
42.0706	46.2973
40.9279	46.1068
45.905	45.8001
46.6001	45.5688
46.9468	39.9419
46.9841	39.9653
47.1396	39.9655
46.8428	39.9888
46.5435	40.0821
47.5046	40.122
47.1664	40.1626
39.6641	40.3376
41.1183	40.3788
40.9266	42.9176
46.8988	43.0691
46.7345	43.1981
40.6784	40.1504
43.5323	40.1504
40.497	39.9341
40.7396	39.8524
44.3004	39.832
44.405	39.7629
38.0889	39.613
37.1833	38.1602
43.931	38.1406
43.8675	38.2571
43.4847	38.5028
43.4233	38.6873
43.5903	38.7174
43.7685	38.5944
38.3694	38.5263
37.7222	38.6304
37.7222	43.1662
37.8124	43.168
44.9328	43.1054
44.2311	41.4546
37.129	41.5733
37.1354	39.9275
36.8804	39.9927
39.6759	43.0633
39.6784	42.7972
39.8215	42.7613
39.8874	39.6439
40.943	46.0337
40.5198	40.7783
42.7332	46.6592
43.8016	45.5853
43.8394	38.9314
43.8936	38.7157
43.8749	38.6862
40.6164	38.4643
40.664	38.265
40.7206	38.1314
40.8148	38.3241
41.8592	38.6151
42.8421	41.1806
42.4997	41.5542
42.5188	39.9516
42.4813	44.5679
42.5128	39.854
41.3583	39.7982
41.4181	39.8016
41.3188	39.6286
41.2229	41.1339
43.7146	38.8391
43.6523	38.7394
38.7039	38.8604
40.5016	44.251
43.4837	38.9517
43.5423	38.8699
43.4018	38.9517
40.513	39.0477
40.397	38.9665
43.3227	43.7213
43.4069	44.0517
43.7289	44.5533
43.9165	44.6272
40.1595	42.2362
40.1222	43.4173
40.142	43.4445
40.2756	43.3904
40.4731	43.5267
40.4958	41.9728
40.351	41.7518
40.0785	38.8794
40.3833	38.9466
40.2273	42.3424
38.8043	42.5687
38.5597	42.5066
38.2569	42.5639
40.848	42.4906
36.9411	41.3347
37.0726	41.1258
38.3069	41.0908
38.4503	41.3789
38.4413	41.3966
38.6065	40.8389
38.8294	40.8085
38.9092	40.454
39.6581	40.2804
39.4842	40.1334
39.7146	40.6179
39.8712	40.7798
40.0389	40.9384
40.0979	45.2264
40.2905	39.169
40.7	42.8295
48.5094	39.2329
44.6099	40.0352
44.4344	40.0421
48.8137	43.7502
49.2039	43.6038
39.9755	43.4236
39.7962	40.3294
39.7914	40.0964
48.6546	37.12
45.2407	40.2658
49.7914	40.3989
49.9687	37.4945
49.9312	38.9438
49.4518	38.9549
48.9282	39.0904
50.5044	37.9436
50.1587	37.8731
43.4345	39.4883
43.2476	39.3999
43.1034	37.8236
43.0479	37.7025
42.883	37.1392
42.7604	37.038
42.7963	37.1392
42.748	36.9664
37.8192	38.3606
37.517	39.3482
37.4168	39.4374
40.4045	37.396
40.6445	37.2769
42.656	38.679
44.2251	39.7899
44.7113	39.8768
45.103	40.0294
45.2668	38.6904
45.2743	38.8029
45.3192	41.4313
45.3405	41.4762
45.3405	41.6147
39.7175	38.5536
39.6402	37.8601
37.2878	38.6747
37.3711	39.7003
37.4742	40.2169
40.3464	40.3856
38.2319	40.5678
38.1252	42.7752
38.2748	41.0704
38.3991	41.1363
38.7983	41.3021
47.9331	41.3382
45.8811	39.9459
37.5659	40.0012
37.5686	42.7878
37.6552	42.8973
37.776	38.9537
38.044	38.6796
41.7309	41.3583
41.6577	41.4312
41.696	41.4953
41.6356	41.8661
41.4461	41.6219
39.1496	39.1787
42.8153	39.0232
39.0867	39.3234
42.1314	39.3149
39.9279	39.2415
43.3764	39.284
43.6687	39.5874
43.7906	38.1324
43.8332	39.8361
39.6144	39.6083
39.6915	39.5397
39.7977	39.4345
39.7253	39.4369
39.6373	39.2474
39.9908	39.2284
39.4858	40.8437
46.1982	41.121
46.4694	41.121
46.8745	40.833
41.3745	40.5587
41.5327	38.3045
41.6979	38.3418
41.5329	38.3707
41.461	38.3816
43.8322	43.951
38.7082	40.707
38.8068	40.8693
38.7052	42.6523
43.0165	42.3532
42.9688	42.3459
42.9912	43.3287
42.9999	43.2073
42.9416	43.0984
42.8802	42.765
42.8677	40.5621
45.4905	40.2641
45.3603	40.5518
46.0513	40.3981
42.6883	38.2646
42.8274	37.9632
42.7979	39.171
41.6492	39.2286
38.2021	39.4459
38.141	38.7268
46.0617	38.6061
45.9377	39.724
38.8548	39.6854
38.9232	39.8415
39.4054	40.4056
41.8749	40.3787
41.9037	41.582
41.9957	41.6976
45.7904	41.7283
52.871	43.5353
42.3987	41.2341
41.7398	41.3472
41.7035	41.6651
43.005	41.8029
42.8564	41.2858
42.6611	41.1921
42.4476	39.9333
37.2082	40.0502
37.1499	40.2575
36.875	42.6858
42.3205	42.5391
36.675	42.4517
41.3607	42.5016
41.5075	42.6762
41.6188	40.8203
41.6288	43.6692
41.8779	43.7829
42.015	44.0246
37.5888	44.2112
42.8361	44.1436
43.2435	43.9391
43.5057	43.7733
43.6611	43.7677
43.6652	40.3269
40.9314	40.1193
40.6452	40.0402
40.382	40.0269
40.186	39.8019
39.9659	39.6428
39.8225	39.5078
39.7544	43.1179
38.833	39.6611
40.4211	39.7204
40.2188	39.8524
40.3205	39.8524
40.1978	39.0822
39.9857	39.0674
39.9205	39.0674
38.5531	39.8212
41.3136	39.9396
41.4535	39.8075
40.7831	39.7052
40.8503	38.2382
44.6822	38.2666
43.9418	42.4145
43.4062	42.4145
42.9921	42.4389
38.8297	43.6638
38.7483	44.0849
37.7669	44.2739
37.7309	44.0752
37.8643	39.4825
35.1908	38.9575
36.8048	37.9215
36.8443	40.2346
37.2523	40.7756
42.6481	39.4093
43.0443	39.4571
40.3221	39.3346
38.9097	40.5597
41.6996	40.6506
42.402	40.8308
40.6659	40.8417
40.3457	40.8394
45.5683	40.9515
45.5756	41.0247
45.5509	41.0031
45.4392	40.7935
45.3483	40.9528
45.1388	40.4978
44.9853	40.7062
38.8365	40.5492
38.6187	40.4636
38.6343	40.3631
38.89	43.7484
39.1579	43.7653
40.1934	43.6776

## Sheet: One sim - SD fil angle
14.9446	16.4694
14.9633	16.1705
13.2328	17.623
18.824	19.6742
19.7157	19.3991
19.4766	19.3294
19.5115	19.15
19.2221	19.3831
19.1956	19.4147
19.062	19.7458
18.9736	19.8828
18.8656	18.3222
18.7273	18.2065
18.8048	18.1264
18.9065	18.0896
19.0236	18.0304
18.5382	18.2127
18.553	18.1927
18.6009	18.047
18.5369	18.1941
18.2844	18.1864
18.1903	18.1505
17.9198	18.0433
18.3605	17.978
18.5033	17.18
19.3635	17.9908
18.6447	17.969
18.5873	17.9876
18.4368	18.0924
18.2798	17.2195
18.2232	17.0424
18.2045	16.9196
18.2051	16.912
18.3991	16.978
16.6564	17.086
19.0606	17.0457
19.0296	17.0678
18.3383	17.1519
18.4625	17.2529
19.1449	18.261
19.1684	18.0462
18.4245	17.8108
17.11	17.6101
18.2963	17.8869
18.397	16.9203
18.4194	16.9657
18.4445	18.1691
18.4887	18.2532
18.206	18.1384
18.1708	17.7315
18.4256	17.9805
17.7718	17.91
18.434	17.9193
18.6779	17.9432
18.233	17.937
18.1874	17.818
18.2412	16.4376
18.2744	17.6869
18.1093	17.4729
18.1363	17.3656
18.1785	17.2438
18.1459	17.2174
18.0012	17.2735
18.125	17.3021
18.102	17.326
18.1997	17.2843
18.2797	17.2448
18.0144	17.2773
16.0259	18.1091
18.0778	18.2768
18.0223	17.6185
17.9153	17.8251
17.6019	17.8143
17.6654	17.7695
17.7765	17.6411
17.916	17.6226
17.9949	17.5301
18.0397	18.5222
18.1175	18.5399
18.6356	17.5922
18.7322	17.5286
18.706	17.539
18.7081	17.5532
18.4172	17.635
18.4204	18.0388
18.7944	18.0303
18.2234	17.9362
18.203	17.3724
18.2373	17.987
18.2319	17.8293
18.2617	17.2777
18.2169	17.2849
18.2132	17.4741
18.524	17.5806
18.5169	17.5689
18.4581	18.9765
18.4521	19.0661
18.4684	19.0575
18.0779	19.0119
18.0255	17.8298
17.9807	18.0517
17.9991	18.0786
18.0083	18.1146
18.3098	18.1073
17.9487	18.068
18.4563	18.1364
18.5569	18.1852
18.7284	18.2143
17.2469	18.1273
18.7204	18.0247
18.6414	18.022
18.6811	18.0269
18.6868	18.3259
18.2984	17.8793
18.2949	17.7647
18.3672	17.6205
18.4616	18.2251
18.4572	18.2244
18.3627	16.0014
18.2692	16.0114
18.7135	17.2454
17.4774	17.2708
17.6308	17.3372
18.5445	17.4444
17.8411	17.579
17.8618	17.6977
17.9504	17.5301
18.3356	17.5748
16.618	17.5279
16.7366	18.0128
16.7324	17.6071
16.8213	17.5551
17.9881	16.3581
18.9869	16.236
19.0744	16.2081
19.0744	16.2507
18.6821	16.3111
18.6934	17.4206
18.6649	17.3045
18.6752	17.2242
18.717	17.1599
18.7219	17.0551
18.724	17.0838
18.7163	17.7651
18.7031	17.7019
18.6122	17.6797
18.7145	17.711
19.0649	17.7779
19.1167	17.8004
18.5604	17.2829
18.5323	17.28
18.4394	17.3486
18.4202	17.4599
18.3268	17.5673
18.3835	17.6389
18.3835	17.9841
18.4134	18.0633
18.4447	18.4401
18.4306	17.2597
18.2875	17.2235
18.3247	17.5006
19.0473	17.3893
19.1158	17.4117
19.1971	17.3405
19.196	17.4948
17.7527	17.5701
17.7212	17.8913
17.6369	16.989
17.535	16.9037
17.5259	17.7076
18.407	17.6193
18.402	17.5649
18.4256	17.3814
17.883	17.374
17.1742	17.3467
17.1191	17.4391
17.9937	17.4984
18.0993	18.1639
18.191	16.7977
17.2792	16.9292
17.3538	17.0411
18.3884	17.0359
18.3365	16.6833
18.2964	16.6196
18.2706	17.3443
18.2906	17.5786
18.1835	17.8902
18.3175	17.9214
18.7104	17.8839
18.7504	17.8694
18.7176	17.8984
18.9956	18.4936
18.5538	18.6749
19.2956	17.7486
19.3008	17.6463
18.7112	18.3621
18.7252	17.7695
19.8189	17.7073
19.3628	17.6523
19.3344	15.8018
18.6576	15.7492
18.6709	15.7707
19.4354	17.4413
19.5026	17.4991
18.7457	17.4925
18.7284	17.4176
19.2466	17.3142
19.2087	17.242
19.1545	17.173
18.3592	17.1301
18.291	16.8513
18.2407	17.0611
18.2357	17.3052
18.2039	17.4761
18.1814	17.7676
18.1597	17.766
18.0676	17.7381
18.0078	17.9855
17.5141	18.041
17.47	18.11
17.9646	18.1401
17.9446	17.1826
17.8894	17.2068
17.8581	17.8039
17.8888	17.7827
17.8623	17.7872
17.8164	18.4862
17.3809	17.8595
17.8811	17.9083
17.9603	17.9077
18.0442	17.854
18.0427	17.7873
18.4602	17.8176
18.4691	17.9065
18.3908	17.9197
18.3782	17.9033
18.3931	17.8684
18.6992	17.7932
18.6951	17.6914
18.6665	18.1805
18.6467	18.2107
18.6311	17.2099
18.5845	17.2596
18.5009	17.3834
18.2074	17.5434
18.1684	17.497
18.1139	17.5801
17.5622	17.6109
17.5403	17.6269
17.617	17.6849
17.6928	17.6522
17.764	17.7258
17.7966	17.7367
18.2844	17.7934
18.2831	17.7867
18.8766	17.8184
18.8711	17.8447
19.2517	17.8409
18.6679	17.8039
18.6997	18.0817
18.2593	18.0888
18.2768	18.1948
18.2987	18.1341
18.3406	18.0728
18.4252	18.0951
18.4142	17.5688
18.9902	17.2769
18.2528	17.1716
18.1843	17.1291
18.1669	18.2335
18.1487	18.2611
17.8239	18.2944
17.8106	17.1023
17.8495	17.0515
17.8392	17.0892
17.7893	17.14
18.3349	18.2918
17.8645	18.333
17.9644	18.3599
18.2114	18.3225
18.2682	18.2855
18.1902	17.4045
18.4602	17.9403
19.105	16.9002
19.1806	16.8579
18.4648	16.8954
18.5303	15.9466
18.7771	17.8876
18.7491	17.396
18.7753	17.3861
19.1789	17.4492
19.1854	17.5398
19.2686	17.5782
18.2824	17.4627
18.1953	17.4017
18.2212	17.3784
18.6275	17.4258
18.5793	17.2387
18.482	17.3029
18.4681	18.2572
18.4963	18.3788
18.1242	18.0698
18.5395	17.7354
18.5642	17.7075
18.5625	17.6103
18.5449	17.6124
18.4607	17.1875
18.2463	17.1327
18.1317	17.1315
18.0745	17.1403
17.9408	18.1001
17.8716	18.0247
17.8215	17.4584
17.7252	17.2012
17.6761	17.2572
17.6984	17.3381
17.6425	17.3619
17.6819	17.4143
18.2215	17.3746
17.5131	17.4237
17.583	17.4732
16.5619	17.5509
16.64	17.5636
18.4758	17.521
18.4416	17.4966
18.4558	17.4708
18.6782	17.8276
18.8177	17.6338
18.9293	17.6583
18.5413	17.7034
18.5303	17.3203
18.5261	18.1308
18.4691	17.2648
18.4793	17.7551
18.5338	17.2662
18.3281	17.3534
18.1408	17.4443
18.2587	17.3487
18.0775	17.1675
18.0584	17.1743
18.0009	17.1215
17.983	17.0937
18.1074	17.5047
18.0422	17.5188
17.42	17.633
19.106	17.7114
19.1451	17.7236
18.5971	17.5745
18.5986	17.5228
18.5535	17.3494
18.4369	18.1592
18.2799	17.7769
18.2031	17.0757
18.1503	16.9334
18.0169	16.9631
17.852	16.9891
17.6908	17.2013
17.6567	17.3916
17.747	16.8938
17.8378	16.8945
17.9271	16.9575
17.4525	17.408
17.4979	17.7592
17.6131	17.0174
17.607	17.0037
17.0386	17.8509
18.4233	17.8655
18.3272	17.9035
18.4039	17.4636
18.2539	17.3876
18.6867	17.3657
18.4137	17.3344
18.4971	17.4659
18.9142	18.1852
18.9275	18.3218
18.484	18.3549
18.562	17.3954
19.2602	17.371
18.7984	18.1759
18.8246	16.7922
18.8409	17.6874
18.3713	17.8534
18.2458	18.064
18.0852	18.2565
18.0455	17.0928
18.0646	17.1626
17.9902	17.1723
18.9981	17.2085
18.4078	17.9814
17.9625	17.957
17.8717	18.7201
17.8199	18.6603
17.8224	18.0957
17.8453	18.0392
17.914	17.9821
18.019	17.866
18.1129	17.6917
18.378	17.5641
17.7982	17.4775
17.77	17.4713
18.1246	17.4552
17.3458	17.4772
17.2577	17.1355
16.8129	18.5677
16.7627	18.6096
17.6188	17.5593
17.9738	17.6352
17.8863	17.7169
17.898	17.8326
17.6109	17.7277
17.5102	17.5942
17.4262	17.3449
17.427	17.367
17.3902	17.3889
17.4229	17.4744
17.4793	17.3789
17.5493	17.7289
16.7718	17.3545
16.7633	17.4168
17.811	17.0145
16.2197	16.9863
17.8491	16.9576
17.9877	16.9105
17.1025	17.9828
17.004	18.3698
17.5712	17.4792
17.5663	17.8622
17.6089	17.9605
17.0889	18.0076
17.7205	18.0012
17.4864	17.9627
17.6803	17.9353
17.8051	17.8805
17.8912	17.8853
18.2207	17.7479
18.2509	18.6771
18.2759	18.7028
18.742	18.648
18.8101	18.5567
18.8376	17.1488
18.867	17.1711
18.8916	17.1873
19.0303	17.115
19.1139	16.9868
19.3668	16.8978
19.2729	16.8844
18.3689	16.9917
18.3662	17.0839
18.2634	17.8049
19.1297	17.8799
19.2142	17.9199
18.3016	17.349
18.5058	17.3098
18.2036	17.2382
18.2114	17.1538
18.6665	17.1616
18.6628	17.1316
18.0421	17.1907
17.3584	16.6772
18.6209	16.6222
18.6032	16.564
18.6342	16.5966
18.6952	16.6808
18.7774	16.6985
18.8461	16.7539
18.389	16.7667
17.8413	16.8664
17.7814	17.7633
17.7154	17.7901
18.8243	17.75
18.607	17.3339
17.1595	17.3553
17.1861	17.3194
17.2104	17.3043
18.113	17.4623
18.1657	17.4776
18.1709	17.5722
18.1428	17.4551
18.2159	18.4128
18.1895	17.6742
18.2738	18.5426
18.4298	18.3878
18.5541	17.3334
18.6158	17.1803
18.6267	17.0799
18.3152	16.9527
18.249	16.8801
18.1632	16.8845
18.0768	17.0047
18.0839	17.1123
18.308	17.5865
18.3288	17.5954
18.4246	17.3437
18.4748	18.2084
18.5555	17.2158
18.4931	17.1241
18.5021	17.0641
18.5355	17.1011
18.4836	17.3598
18.5698	17.1275
18.4337	17.0822
17.7184	16.982
17.9795	17.8765
18.385	16.9543
18.4468	16.9811
18.4779	16.9388
18.2679	16.9387
18.257	16.9713
18.4765	17.8459
18.4769	17.968
18.539	18.0712
18.639	18.1443
18.3075	17.8752
18.2374	17.9669
18.1563	18.0899
18.1692	18.1756
18.2098	18.2532
18.1953	18.2085
18.105	18.0844
18.0368	17.2372
17.9999	17.0881
17.9465	17.8495
17.7371	17.8743
17.7105	17.9276
17.7312	17.9066
18.1395	17.8951
17.0178	17.8306
17.1105	17.8282
17.9195	17.782
18.0445	17.6672
18.1352	17.6372
18.2697	17.5887
18.3033	17.5478
18.4077	17.4281
18.4976	17.3525
18.4654	17.3212
18.4372	17.415
18.4679	17.3999
18.5054	17.3622
18.4571	18.3361
18.4523	17.0702
18.4571	17.5768
19.0118	17.2904
18.6539	17.3309
18.6558	17.3329
19.2463	18.131
19.1987	18.0684
18.687	18.0204
18.6685	17.2526
18.7673	17.2173
19.3148	15.798
18.9916	17.1691
19.0757	17.2044
19.0443	15.9468
19.0801	17.0191
19.0824	16.9926
19.1229	16.9956
19.3412	16.0894
19.4303	16.0095
18.6124	16.9324
18.5965	16.9969
18.5403	16.3555
18.4538	16.3987
18.4356	15.8609
18.5166	15.7332
18.5861	15.576
18.658	15.5397
18.1844	16.7249
18.083	16.8216
17.9752	16.8275
18.471	16.0201
18.5665	16.1075
18.8086	17.0397
18.981	17.1708
18.9635	17.2166
18.9372	17.2511
18.9853	17.0038
18.9875	16.9406
18.986	17.2996
18.9106	17.1359
18.9152	17.0858
18.5221	16.5331
18.4691	15.9785
17.6476	16.7127
17.6993	17.0937
17.7154	17.2334
18.4095	17.2779
17.8859	17.251
17.7222	17.7468
17.6139	17.3685
17.6608	17.4349
17.9234	17.5137
19.0219	17.5697
18.7447	17.4299
17.454	17.5296
17.4773	17.6647
17.5148	17.7604
17.5162	17.1401
17.4646	17.0499
18.004	17.8001
18.0316	17.7319
18.1461	17.7268
18.2443	17.7477
18.2298	17.773
18.1271	17.5463
18.3132	17.5224
17.9538	17.5763
18.2099	17.5872
17.9609	17.6032
18.5835	17.6103
18.5561	17.555
18.4654	16.4443
18.4136	17.3765
18.0041	17.3296
18.0471	17.2971
18.0612	17.3011
18.0408	17.31
18.0795	17.3689
18.2268	17.4266
18.266	17.5837
19.1785	17.6273
19.2612	17.5888
19.2898	17.5632
18.5532	17.5098
18.6241	16.6044
18.6987	16.649
18.6578	16.7797
18.5639	16.955
18.5786	17.9551
18.2524	17.5008
18.3266	17.5136
18.4478	17.6778
18.5596	17.713
18.643	17.7636
18.6896	18.0135
18.5951	17.9179
18.5627	17.8131
18.607	17.6595
18.6628	17.2643
18.9509	17.263
18.9	17.3327
19.0024	17.4653
18.7092	17.3167
18.6566	17.2678
18.505	17.44
18.1812	17.465
17.5861	17.5291
17.5509	17.3869
18.7995	17.3662
18.8939	17.4924
18.1965	17.4663
18.3067	17.4545
18.3596	17.4961
18.497	17.4102
18.5379	17.6699
18.5647	17.6893
18.8902	17.8162
19.6635	18.339
18.3791	17.7583
18.2791	17.7299
18.1482	17.7872
18.2384	17.816
18.1545	17.7284
18.0449	17.6267
18.0056	17.5619
16.5725	17.5738
16.546	17.5658
16.5671	17.8696
17.9218	17.7652
16.6504	17.6465
17.9128	17.7164
18.0462	17.7634
18.1471	17.4296
18.1665	18.0618
18.1902	18.0833
18.17	18.0824
17.3131	18.0764
18.3144	18.0396
18.4602	18.0791
18.5305	18.0922
18.5755	18.1133
18.5088	17.5335
18.4205	17.4818
18.4174	17.4005
18.4011	17.4103
18.3447	17.3139
18.2947	17.2401
18.3111	17.18
18.3793	18.0566
18.181	17.155
18.3931	17.1557
18.2884	17.1676
18.2446	17.1544
18.1424	17.0119
18.0865	16.9991
18.0292	16.9808
18.1522	17.0148
18.4395	17.0436
18.5909	17.0427
18.5803	17.0643
18.5739	16.8961
18.9413	17.0226
18.8631	17.7509
18.8026	17.7059
18.7086	17.6978
18.079	18.0515
18.063	18.0758
18.0781	18.1262
18.1188	18.1333
18.1456	17.4509
16.2608	17.3029
17.456	16.5789
17.481	17.3818
17.5097	17.3838
18.5146	17.2754
18.4478	17.2918
18.1836	17.3403
17.9466	17.5108
17.9885	17.6231
18.2002	17.6789
18.0935	17.7354
18.1883	17.7963
19.0756	17.7958
19.0325	17.6753
19.0086	17.5386
19.0096	17.4572
18.9827	17.4737
18.946	17.2986
18.8542	17.1404
18.0565	17.0254
17.9192	16.9306
17.8056	17.0344
17.7668	18.1739
17.687	18.2401
17.6915	18.2598

## Sheet: One sim - Time(s) - Fil angle
8.65309e-05	8.65309e-05
0.1362	0.1362
0.272313	0.272313
0.408426	0.408426
0.544539	0.544539
0.680652	0.680652
0.816765	0.816765
0.952878	0.952878
1.08899	1.08899
1.2251	1.2251
1.36122	1.36122
1.49733	1.49733
1.63344	1.63344
1.76956	1.76956
1.90567	1.90567
2.04178	2.04178
2.1779	2.1779
2.31401	2.31401
2.45012	2.45012
2.58623	2.58623
2.72235	2.72235
2.85846	2.85846
2.99457	2.99457
3.13069	3.13069
3.2668	3.2668
3.40291	3.40291
3.53903	3.53903
3.67514	3.67514
3.81125	3.81125
3.94736	3.94736
4.08348	4.08348
4.21959	4.21959
4.3557	4.3557
4.49182	4.49182
4.62793	4.62793
4.76404	4.76404
4.90016	4.90016
5.03627	5.03627
5.17238	5.17238
5.30849	5.30849
5.44461	5.44461
5.58072	5.58072
5.71683	5.71683
5.85295	5.85295
5.98906	5.98906
6.12517	6.12517
6.26129	6.26129
6.3974	6.3974
6.53351	6.53351
6.66963	6.66963
6.80574	6.80574
6.94185	6.94185
7.07796	7.07796
7.21408	7.21408
7.35019	7.35019
7.4863	7.4863
7.62242	7.62242
7.75853	7.75853
7.89464	7.89464
8.03076	8.03076
8.16687	8.16687
8.30298	8.30298
8.43909	8.43909
8.57521	8.57521
8.71132	8.71132
8.84743	8.84743
8.98355	8.98355
9.11966	9.11966
9.25577	9.25577
9.39189	9.39189
9.528	9.528
9.66411	9.66411
9.80022	9.80022
9.93634	9.93634
10.0725	10.0725
10.2086	10.2086
10.3447	10.3447
10.4808	10.4808
10.6169	10.6169
10.753	10.753
10.8891	10.8891
11.0252	11.0252
11.1614	11.1614
11.2975	11.2975
11.4336	11.4336
11.5697	11.5697
11.7058	11.7058
11.8419	11.8419
11.978	11.978
12.1141	12.1141
12.2503	12.2503
12.3864	12.3864
12.5225	12.5225
12.6586	12.6586
12.7947	12.7947
12.9308	12.9308
13.0669	13.0669
13.2031	13.2031
13.3392	13.3392
13.4753	13.4753
13.6114	13.6114
13.7475	13.7475
13.8836	13.8836
14.0197	14.0197
14.1558	14.1558
14.292	14.292
14.4281	14.4281
14.5642	14.5642
14.7003	14.7003
14.8364	14.8364
14.9725	14.9725
15.1086	15.1086
15.2447	15.2447
15.3809	15.3809
15.517	15.517
15.6531	15.6531
15.7892	15.7892
15.9253	15.9253
16.0614	16.0614
16.1975	16.1975
16.3337	16.3337
16.4698	16.4698
16.6059	16.6059
16.742	16.742
16.8781	16.8781
17.0142	17.0142
17.1503	17.1503
17.2864	17.2864
17.4226	17.4226
17.5587	17.5587
17.6948	17.6948
17.8309	17.8309
17.967	17.967
18.1031	18.1031
18.2392	18.2392
18.3753	18.3753
18.5115	18.5115
18.6476	18.6476
18.7837	18.7837
18.9198	18.9198
19.0559	19.0559
19.192	19.192
19.3281	19.3281
19.4643	19.4643
19.6004	19.6004
19.7365	19.7365
19.8726	19.8726
20.0087	20.0087
20.1448	20.1448
20.2809	20.2809
20.417	20.417
20.5532	20.5532
20.6893	20.6893
20.8254	20.8254
20.9615	20.9615
21.0976	21.0976
21.2337	21.2337
21.3698	21.3698
21.5059	21.5059
21.6421	21.6421
21.7782	21.7782
21.9143	21.9143
22.0504	22.0504
22.1865	22.1865
22.3226	22.3226
22.4587	22.4587
22.5948	22.5948
22.731	22.731
22.8671	22.8671
23.0032	23.0032
23.1393	23.1393
23.2754	23.2754
23.4115	23.4115
23.5476	23.5476
23.6838	23.6838
23.8199	23.8199
23.956	23.956
24.0921	24.0921
24.2282	24.2282
24.3643	24.3643
24.5004	24.5004
24.6365	24.6365
24.7727	24.7727
24.9088	24.9088
25.0449	25.0449
25.181	25.181
25.3171	25.3171
25.4532	25.4532
25.5893	25.5893
25.7254	25.7254
25.8616	25.8616
25.9977	25.9977
26.1338	26.1338
26.2699	26.2699
26.406	26.406
26.5421	26.5421
26.6782	26.6782
26.8144	26.8144
26.9505	26.9505
27.0866	27.0866
27.2227	27.2227
27.3588	27.3588
27.4949	27.4949
27.631	27.631
27.7671	27.7671
27.9033	27.9033
28.0394	28.0394
28.1755	28.1755
28.3116	28.3116
28.4477	28.4477
28.5838	28.5838
28.7199	28.7199
28.856	28.856
28.9922	28.9922
29.1283	29.1283
29.2644	29.2644
29.4005	29.4005
29.5366	29.5366
29.6727	29.6727
29.8088	29.8088
29.945	29.945
30.0811	30.0811
30.2172	30.2172
30.3533	30.3533
30.4894	30.4894
30.6255	30.6255
30.7616	30.7616
30.8977	30.8977
31.0339	31.0339
31.17	31.17
31.3061	31.3061
31.4422	31.4422
31.5783	31.5783
31.7144	31.7144
31.8505	31.8505
31.9866	31.9866
32.1228	32.1228
32.2589	32.2589
32.395	32.395
32.5311	32.5311
32.6672	32.6672
32.8033	32.8033
32.9394	32.9394
33.0756	33.0756
33.2117	33.2117
33.3478	33.3478
33.4839	33.4839
33.62	33.62
33.7561	33.7561
33.8922	33.8922
34.0283	34.0283
34.1645	34.1645
34.3006	34.3006
34.4367	34.4367
34.5728	34.5728
34.7089	34.7089
34.845	34.845
34.9811	34.9811
35.1172	35.1172
35.2534	35.2534
35.3895	35.3895
35.5256	35.5256
35.6617	35.6617
35.7978	35.7978
35.9339	35.9339
36.07	36.07
36.2062	36.2062
36.3423	36.3423
36.4784	36.4784
36.6145	36.6145
36.7506	36.7506
36.8867	36.8867
37.0228	37.0228
37.1589	37.1589
37.2951	37.2951
37.4312	37.4312
37.5673	37.5673
37.7034	37.7034
37.8395	37.8395
37.9756	37.9756
38.1117	38.1117
38.2478	38.2478
38.384	38.384
38.5201	38.5201
38.6562	38.6562
38.7923	38.7923
38.9284	38.9284
39.0645	39.0645
39.2006	39.2006
39.3368	39.3368
39.4729	39.4729
39.609	39.609
39.7451	39.7451
39.8812	39.8812
40.0173	40.0173
40.1534	40.1534
40.2895	40.2895
40.4257	40.4257
40.5618	40.5618
40.6979	40.6979
40.834	40.834
40.9701	40.9701
41.1062	41.1062
41.2423	41.2423
41.3784	41.3784
41.5146	41.5146
41.6507	41.6507
41.7868	41.7868
41.9229	41.9229
42.059	42.059
42.1951	42.1951
42.3312	42.3312
42.4674	42.4674
42.6035	42.6035
42.7396	42.7396
42.8757	42.8757
43.0118	43.0118
43.1479	43.1479
43.284	43.284
43.4201	43.4201
43.5563	43.5563
43.6924	43.6924
43.8285	43.8285
43.9646	43.9646
44.1007	44.1007
44.2368	44.2368
44.3729	44.3729
44.509	44.509
44.6452	44.6452
44.7813	44.7813
44.9174	44.9174
45.0535	45.0535
45.1896	45.1896
45.3257	45.3257
45.4618	45.4618
45.598	45.598
45.7341	45.7341
45.8702	45.8702
46.0063	46.0063
46.1424	46.1424
46.2785	46.2785
46.4146	46.4146
46.5507	46.5507
46.6869	46.6869
46.823	46.823
46.9591	46.9591
47.0952	47.0952
47.2313	47.2313
47.3674	47.3674
47.5035	47.5035
47.6396	47.6396
47.7758	47.7758
47.9119	47.9119
48.048	48.048
48.1841	48.1841
48.3202	48.3202
48.4563	48.4563
48.5924	48.5924
48.7286	48.7286
48.8647	48.8647
49.0008	49.0008
49.1369	49.1369
49.273	49.273
49.4091	49.4091
49.5452	49.5452
49.6813	49.6813
49.8175	49.8175
49.9536	49.9536
50.0897	50.0897
50.2258	50.2258
50.3619	50.3619
50.498	50.498
50.6341	50.6341
50.7702	50.7702
50.9064	50.9064
51.0425	51.0425
51.1786	51.1786
51.3147	51.3147
51.4508	51.4508
51.5869	51.5869
51.723	51.723
51.8592	51.8592
51.9953	51.9953
52.1314	52.1314
52.2675	52.2675
52.4036	52.4036
52.5397	52.5397
52.6758	52.6758
52.8119	52.8119
52.9481	52.9481
53.0842	53.0842
53.2203	53.2203
53.3564	53.3564
53.4925	53.4925
53.6286	53.6286
53.7647	53.7647
53.9008	53.9008
54.037	54.037
54.1731	54.1731
54.3092	54.3092
54.4453	54.4453
54.5814	54.5814
54.7175	54.7175
54.8536	54.8536
54.9898	54.9898
55.1259	55.1259
55.262	55.262
55.3981	55.3981
55.5342	55.5342
55.6703	55.6703
55.8064	55.8064
55.9425	55.9425
56.0787	56.0787
56.2148	56.2148
56.3509	56.3509
56.487	56.487
56.6231	56.6231
56.7592	56.7592
56.8953	56.8953
57.0314	57.0314
57.1676	57.1676
57.3037	57.3037
57.4398	57.4398
57.5759	57.5759
57.712	57.712
57.8481	57.8481
57.9842	57.9842
58.1204	58.1204
58.2565	58.2565
58.3926	58.3926
58.5287	58.5287
58.6648	58.6648
58.8009	58.8009
58.937	58.937
59.0731	59.0731
59.2093	59.2093
59.3454	59.3454
59.4815	59.4815
59.6176	59.6176
59.7537	59.7537
59.8898	59.8898
60.0259	60.0259
60.162	60.162
60.2982	60.2982
60.4343	60.4343
60.5704	60.5704
60.7065	60.7065
60.8426	60.8426
60.9787	60.9787
61.1148	61.1148
61.251	61.251
61.3871	61.3871
61.5232	61.5232
61.6593	61.6593
61.7954	61.7954
61.9315	61.9315
62.0676	62.0676
62.2037	62.2037
62.3399	62.3399
62.476	62.476
62.6121	62.6121
62.7482	62.7482
62.8843	62.8843
63.0204	63.0204
63.1565	63.1565
63.2926	63.2926
63.4288	63.4288
63.5649	63.5649
63.701	63.701
63.8371	63.8371
63.9732	63.9732
64.1093	64.1093
64.2454	64.2454
64.3816	64.3816
64.5177	64.5177
64.6538	64.6538
64.7899	64.7899
64.926	64.926
65.0621	65.0621
65.1982	65.1982
65.3343	65.3343
65.4705	65.4705
65.6066	65.6066
65.7427	65.7427
65.8788	65.8788
66.0149	66.0149
66.151	66.151
66.2871	66.2871
66.4232	66.4232
66.5594	66.5594
66.6955	66.6955
66.8316	66.8316
66.9677	66.9677
67.1038	67.1038
67.2399	67.2399
67.376	67.376
67.5122	67.5122
67.6483	67.6483
67.7844	67.7844
67.9205	67.9205
68.0566	68.0566
68.1927	68.1927
68.3288	68.3288
68.4649	68.4649
68.6011	68.6011
68.7372	68.7372
68.8733	68.8733
69.0094	69.0094
69.1455	69.1455
69.2816	69.2816
69.4177	69.4177
69.5538	69.5538
69.69	69.69
69.8261	69.8261
69.9622	69.9622
70.0983	70.0983
70.2344	70.2344
70.3705	70.3705
70.5066	70.5066
70.6427	70.6427
70.7789	70.7789
70.915	70.915
71.0511	71.0511
71.1872	71.1872
71.3233	71.3233
71.4594	71.4594
71.5955	71.5955
71.7317	71.7317
71.8678	71.8678
72.0039	72.0039
72.14	72.14
72.2761	72.2761
72.4122	72.4122
72.5483	72.5483
72.6844	72.6844
72.8206	72.8206
72.9567	72.9567
73.0928	73.0928
73.2289	73.2289
73.365	73.365
73.5011	73.5011
73.6372	73.6372
73.7733	73.7733
73.9095	73.9095
74.0456	74.0456
74.1817	74.1817
74.3178	74.3178
74.4539	74.4539
74.59	74.59
74.7261	74.7261
74.8623	74.8623
74.9984	74.9984
75.1345	75.1345
75.2706	75.2706
75.4067	75.4067
75.5428	75.5428
75.6789	75.6789
75.815	75.815
75.9512	75.9512
76.0873	76.0873
76.2234	76.2234
76.3595	76.3595
76.4956	76.4956
76.6317	76.6317
76.7678	76.7678
76.9039	76.9039
77.0401	77.0401
77.1762	77.1762
77.3123	77.3123
77.4484	77.4484
77.5845	77.5845
77.7206	77.7206
77.8567	77.8567
77.9929	77.9929
78.129	78.129
78.2651	78.2651
78.4012	78.4012
78.5373	78.5373
78.6734	78.6734
78.8095	78.8095
78.9456	78.9456
79.0818	79.0818
79.2179	79.2179
79.354	79.354
79.4901	79.4901
79.6262	79.6262
79.7623	79.7623
79.8984	79.8984
80.0345	80.0345
80.1707	80.1707
80.3068	80.3068
80.4429	80.4429
80.579	80.579
80.7151	80.7151
80.8512	80.8512
80.9873	80.9873
81.1235	81.1235
81.2596	81.2596
81.3957	81.3957
81.5318	81.5318
81.6679	81.6679
81.804	81.804
81.9401	81.9401
82.0762	82.0762
82.2124	82.2124
82.3485	82.3485
82.4846	82.4846
82.6207	82.6207
82.7568	82.7568
82.8929	82.8929
83.029	83.029
83.1651	83.1651
83.3013	83.3013
83.4374	83.4374
83.5735	83.5735
83.7096	83.7096
83.8457	83.8457
83.9818	83.9818
84.1179	84.1179
84.2541	84.2541
84.3902	84.3902
84.5263	84.5263
84.6624	84.6624
84.7985	84.7985
84.9346	84.9346
85.0707	85.0707
85.2068	85.2068
85.343	85.343
85.4791	85.4791
85.6152	85.6152
85.7513	85.7513
85.8874	85.8874
86.0235	86.0235
86.1596	86.1596
86.2957	86.2957
86.4319	86.4319
86.568	86.568
86.7041	86.7041
86.8402	86.8402
86.9763	86.9763
87.1124	87.1124
87.2485	87.2485
87.3847	87.3847
87.5208	87.5208
87.6569	87.6569
87.793	87.793
87.9291	87.9291
88.0652	88.0652
88.2013	88.2013
88.3374	88.3374
88.4736	88.4736
88.6097	88.6097
88.7458	88.7458
88.8819	88.8819
89.018	89.018
89.1541	89.1541
89.2902	89.2902
89.4263	89.4263
89.5625	89.5625
89.6986	89.6986
89.8347	89.8347
89.9708	89.9708
90.1069	90.1069
90.243	90.243
90.3791	90.3791
90.5153	90.5153
90.6514	90.6514
90.7875	90.7875
90.9236	90.9236
91.0597	91.0597
91.1958	91.1958
91.3319	91.3319
91.468	91.468
91.6042	91.6042
91.7403	91.7403
91.8764	91.8764
92.0125	92.0125
92.1486	92.1486
92.2847	92.2847
92.4208	92.4208
92.5569	92.5569
92.6931	92.6931
92.8292	92.8292
92.9653	92.9653
93.1014	93.1014
93.2375	93.2375
93.3736	93.3736
93.5097	93.5097
93.6459	93.6459
93.782	93.782
93.9181	93.9181
94.0542	94.0542
94.1903	94.1903
94.3264	94.3264
94.4625	94.4625
94.5986	94.5986
94.7348	94.7348
94.8709	94.8709
95.007	95.007
95.1431	95.1431
95.2792	95.2792
95.4153	95.4153
95.5514	95.5514
95.6875	95.6875
95.8237	95.8237
95.9598	95.9598
96.0959	96.0959
96.232	96.232
96.3681	96.3681
96.5042	96.5042
96.6403	96.6403
96.7765	96.7765
96.9126	96.9126
97.0487	97.0487
97.1848	97.1848
97.3209	97.3209
97.457	97.457
97.5931	97.5931
97.7292	97.7292
97.8654	97.8654
98.0015	98.0015
98.1376	98.1376
98.2737	98.2737
98.4098	98.4098
98.5459	98.5459
98.682	98.682
98.8181	98.8181
98.9543	98.9543
99.0904	99.0904
99.2265	99.2265
99.3626	99.3626
99.4987	99.4987
99.6348	99.6348
99.7709	99.7709
99.9071	99.9071

[truncated: 6 more sheets: One sim - Mean mem vel, One sim - SD mem vel, One sim - Time(s) - Mem vel, One sim - Mean mem pos, One sim - SD mem pos, One sim - Time(s) - Mem pos]
