# Supplementary material for: Leading edge maintenance in migrating cells is an emergent property of branched actin network growth
Source: eLife journal article supplement (doi:10.7554/elife.74389), 2022-03-10
Supplement: fig4-data1 [file Figure 4-Source Data 2_SpreadRemovalData.xlsx]

## Sheet: All acorr - Condition name
Spreading removed	Complete Model

## Sheet: One sim - Mean fil density
0.34	0.34
0.38875	0.38235
0.4135	0.40355
0.40265	0.39525
0.37715	0.3759
0.3527	0.35
0.32925	0.3266
0.30675	0.30385
0.2888	0.28655
0.27195	0.26915
0.26225	0.2549
0.25025	0.25005
0.2463	0.24755
0.2465	0.2476
0.24565	0.255
0.24995	0.2618
0.2543	0.2686
0.25765	0.27595
0.26675	0.28055
0.27195	0.2843
0.2791	0.29205
0.28785	0.2965
0.2932	0.29815
0.29865	0.3024
0.30175	0.30195
0.30385	0.3038
0.3015	0.30505
0.30245	0.30265
0.30055	0.30245
0.30065	0.3017
0.30475	0.3031
0.3023	0.3049
0.30515	0.30775
0.3051	0.3099
0.30355	0.30645
0.2998	0.3098
0.29675	0.3109
0.2959	0.3091
0.2955	0.3064
0.29675	0.3027
0.2999	0.29835
0.30185	0.2921
0.3033	0.2912
0.3064	0.2909
0.30735	0.2882
0.30595	0.28515
0.3027	0.28385
0.2999	0.2857
0.2986	0.2859
0.29975	0.28955
0.3021	0.29005
0.30435	0.29405
0.3038	0.29545
0.30495	0.295
0.30855	0.29795
0.3077	0.30005
0.31015	0.30095
0.3045	0.30165
0.3057	0.2972
0.30555	0.29635
0.3047	0.295
0.3027	0.29705
0.29925	0.29825
0.29875	0.2975
0.3001	0.2971
0.29885	0.29615
0.29775	0.2974
0.2955	0.2942
0.29855	0.2926
0.3006	0.292
0.29905	0.29205
0.30055	0.29545
0.30275	0.29755
0.3015	0.30055
0.30185	0.3041
0.30275	0.3024
0.30355	0.3013
0.3045	0.29635
0.30775	0.2918
0.3085	0.2904
0.30565	0.28545
0.30655	0.2823
0.30485	0.28155
0.30555	0.2798
0.3084	0.27715
0.3057	0.2792
0.30685	0.27995
0.3085	0.2803
0.30945	0.28245
0.3126	0.2859
0.3132	0.28985
0.3114	0.29195
0.31485	0.29005
0.3149	0.29045
0.3139	0.2947
0.3177	0.2934
0.3104	0.29365
0.30725	0.292
0.3084	0.295
0.30955	0.293
0.3125	0.29025
0.31025	0.2889
0.31155	0.2868
0.31345	0.2872
0.3144	0.28365
0.31645	0.282
0.3161	0.28105
0.31765	0.28235
0.31985	0.2817
0.32375	0.2808
0.3248	0.2771
0.3247	0.27815
0.3239	0.276
0.32345	0.27715
0.318	0.2766
0.32075	0.27605
0.3158	0.2771
0.31665	0.28055
0.3128	0.2852
0.3072	0.28645
0.31055	0.28765
0.3143	0.28455
0.3145	0.28365
0.3137	0.28175
0.3138	0.28105
0.3156	0.2832
0.31805	0.2822
0.3191	0.2836
0.31965	0.28565
0.3192	0.2872
0.31725	0.2843
0.3179	0.2876
0.3192	0.28865
0.324	0.28985
0.3254	0.28765
0.32425	0.2932
0.3277	0.29615
0.32675	0.29655
0.32775	0.29565
0.3238	0.2937
0.3197	0.29505
0.32125	0.2911
0.3173	0.2888
0.31775	0.2867
0.32065	0.2838
0.3225	0.2842
0.3253	0.28425
0.3235	0.28845
0.32095	0.286
0.3201	0.28345
0.3177	0.2782
0.32035	0.27775
0.31885	0.27585
0.32055	0.2728
0.3217	0.2745
0.32635	0.2767
0.3285	0.27445
0.3282	0.27275
0.33015	0.2695
0.3306	0.27105
0.3302	0.2749
0.3243	0.2785
0.324	0.27935
0.32385	0.2813
0.3226	0.28595
0.32005	0.28595
0.31635	0.28795
0.3146	0.2907
0.31435	0.291
0.3164	0.28585
0.31365	0.2875
0.3122	0.2863
0.3109	0.2852
0.3081	0.2822
0.3073	0.2847
0.30705	0.28715
0.30865	0.28765
0.3102	0.28605
0.31065	0.2886
0.31335	0.28965
0.31345	0.2884
0.31115	0.28925
0.30825	0.29035
0.30855	0.2899
0.30675	0.2894
0.3064	0.28795
0.31235	0.28475
0.31425	0.2843
0.31505	0.28675
0.3176	0.28545
0.3206	0.2892
0.3195	0.28745
0.3172	0.2902
0.31395	0.2911
0.31255	0.2891
0.3167	0.28705
0.3169	0.2867
0.31925	0.28575
0.3207	0.28795
0.321	0.2849
0.3221	0.28595
0.32265	0.28625
0.32435	0.28655
0.32765	0.28675
0.32845	0.29005
0.3275	0.2903
0.3279	0.29055
0.32455	0.2913
0.3243	0.2895
0.324	0.28635
0.3232	0.284
0.323	0.28165
0.319	0.28545
0.3156	0.2853
0.31845	0.2882
0.31735	0.2896
0.3153	0.28965
0.3176	0.2883
0.31695	0.287
0.31795	0.2851
0.31685	0.28345
0.31595	0.2838
0.31645	0.28285
0.31635	0.28165
0.3167	0.27745
0.31905	0.2766
	0.277
	0.27595
	0.27645
	0.27205
	0.27505
	0.27495
	0.28115
	0.2799
	0.2807
	0.282
	0.28185
	0.2827
	0.28165
	0.2848
	0.28135
	0.28165
	0.2817
	0.2814
	0.284
	0.2853
	0.28635
	0.2853
	0.2802
	0.28165
	0.28025
	0.27905
	0.28135
	0.2805
	0.2776
	0.27775
	0.2763
	0.27795
	0.2823
	0.2826
	0.28145
	0.28345
	0.281
	0.28445
	0.2811
	0.2812
	0.28285
	0.28345
	0.28545
	0.2881
	0.2881
	0.28945
	0.2868
	0.2855
	0.28415
	0.2832
	0.281
	0.28335
	0.2809
	0.2805
	0.28165
	0.282
	0.2798
	0.2787
	0.27735
	0.2814
	0.2881
	0.2876
	0.2899
	0.2915
	0.29475
	0.2949
	0.29445
	0.29215
	0.28965
	0.29085
	0.29045
	0.29195
	0.2884
	0.29035
	0.28845
	0.28565
	0.28265
	0.28465
	0.28145
	0.2843
	0.28385
	0.28165
	0.27935
	0.276
	0.27835
	0.2751
	0.2778
	0.27875
	0.2788
	0.2761
	0.2765
	0.2815
	0.28375
	0.2819
	0.28095
	0.28235
	0.27925
	0.27895
	0.28195
	0.28255
	0.28625
	0.28915
	0.2915
	0.2946
	0.29725
	0.2981
	0.2933
	0.2882
	0.28565
	0.287
	0.2881
	0.28525
	0.2861
	0.2854
	0.29
	0.2879
	0.29065
	0.29045
	0.29165
	0.28975
	0.28655
	0.28485
	0.2808
	0.27915
	0.2788
	0.2786
	0.27765
	0.27815
	0.27985
	0.2805
	0.28205
	0.28265
	0.2835
	0.28075
	0.28515
	0.28585
	0.2862
	0.2882
	0.2917
	0.28815
	0.28705
	0.2901
	0.2892
	0.28815
	0.2923
	0.29505
	0.2958
	0.2931
	0.2968
	0.29295
	0.29185
	0.28545
	0.2838
	0.28335
	0.28275
	0.27795
	0.2759
	0.27435
	0.2782
	0.28025
	0.2837
	0.2833
	0.2824
	0.28075
	0.28485
	0.2857
	0.29125
	0.28715
	0.28785
	0.2868
	0.2858
	0.2849
	0.2858
	0.28225
	0.28055
	0.27895
	0.2786
	0.2796
	0.277
	0.2808
	0.2812
	0.2817
	0.28045
	0.2782
	0.27635
	0.27445
	0.27455
	0.27375
	0.2762
	0.27245
	0.2688
	0.27055
	0.2714
	0.27225
	0.2691
	0.26735
	0.2703
	0.27385
	0.2724
	0.2725
	0.2749
	0.2794
	0.28015
	0.28235
	0.2845
	0.28715
	0.2937
	0.2944
	0.29495
	0.29365
	0.2908
	0.28845
	0.2881
	0.28575
	0.2805
	0.2797
	0.2781
	0.27195
	0.269
	0.269
	0.2708
	0.2675
	0.27045
	0.2736
	0.27255
	0.2753
	0.27655
	0.275
	0.2749
	0.27585
	0.2738
	0.27375
	0.27305
	0.2754
	0.28065
	0.28165
	0.2844
	0.28305
	0.27915
	0.2819
	0.2847
	0.285
	0.28845
	0.28685
	0.28465
	0.28475
	0.2862
	0.2848
	0.28215
	0.28165
	0.28095
	0.2779
	0.273
	0.27635
	0.277
	0.2724
	0.27215
	0.27165
	0.27
	0.26705
	0.26725
	0.26865
	0.27065
	0.2741
	0.276
	0.27585
	0.27925
	0.28045
	0.27985
	0.2796
	0.2816
	0.28265
	0.2861
	0.2887
	0.28815
	0.2908
	0.29005
	0.2876
	0.28855
	0.2918
	0.29205
	0.2933
	0.2907
	0.29065
	0.2932
	0.29525
	0.2952
	0.29425
	0.29015
	0.28945
	0.29255
	0.2918
	0.28825
	0.2864
	0.28575
	0.28115
	0.27915
	0.28185
	0.28335
	0.2822
	0.2843
	0.28805
	0.28845
	0.2862
	0.2884
	0.29085
	0.2936
	0.2943
	0.2925
	0.289
	0.287
	0.28735
	0.288
	0.2884
	0.28555
	0.28695
	0.28725
	0.28255
	0.27795
	0.27905
	0.27945
	0.27895
	0.27765
	0.27635
	0.27945
	0.28085
	0.2844
	0.2871
	0.28665
	0.29
	0.2889
	0.29215
	0.2872
	0.2883
	0.28415
	0.28405
	0.28305
	0.28235
	0.2866
	0.287
	0.28275
	0.28295
	0.28635
	0.28845
	0.29165
	0.2945
	0.295
	0.2932
	0.2932
	0.29535
	0.2948
	0.2965
	0.29715
	0.29465
	0.2945
	0.29735
	0.29255
	0.2909
	0.2908
	0.29255
	0.2933
	0.29525
	0.29365
	0.294
	0.29255
	0.2927
	0.2943
	0.2917
	0.29435
	0.29375
	0.2914
	0.2889
	0.2875
	0.28615
	0.2837
	0.28255
	0.28145
	0.2805
	0.28215
	0.27975
	0.27635
	0.27655
	0.2788
	0.27955
	0.28115
	0.2833
	0.2852
	0.2878
	0.28425
	0.28485
	0.2858
	0.28675
	0.28875
	0.2903
	0.29175
	0.2942
	0.29755
	0.2991
	0.2997
	0.3041
	0.3051
	0.30175
	0.3041
	0.3021
	0.3003
	0.29745
	0.2999
	0.29665
	0.29385
	0.29025
	0.2865
	0.2853
	0.28605
	0.2847
	0.2871
	0.287
	0.28945
	0.29135
	0.29445
	0.2919
	0.28945
	0.28715
	0.28395
	0.28245
	0.2873
	0.28925
	0.2901
	0.29575
	0.29885
	0.29565
	0.2959
	0.29905
	0.29675
	0.29595
	0.2935
	0.2961
	0.2967
	0.2959
	0.2953
	0.2943
	0.2968
	0.2968
	0.2976
	0.2927
	0.2902
	0.2877
	0.2856
	0.28275
	0.2856
	0.2877
	0.2909
	0.29165
	0.29355
	0.2958
	0.29405
	0.2939
	0.2911
	0.29365
	0.29025
	0.29405
	0.29715
	0.298
	0.2971
	0.29705
	0.30065
	0.30205
	0.3011
	0.30045
	0.3028
	0.3027
	0.3015
	0.29465
	0.29085
	0.29125
	0.2912
	0.29255
	0.29025
	0.28905
	0.28585
	0.28475
	0.283
	0.27865
	0.2792
	0.2799
	0.28015
	0.28105
	0.28245
	0.28175
	0.28325
	0.2826
	0.28395
	0.28605
	0.2879
	0.2874
	0.2843
	0.28265
	0.27945
	0.27725
	0.279
	0.2764
	0.2721
	0.27025
	0.26935
	0.2716
	0.26955
	0.2702
	0.2747
	0.2767
	0.2822
	0.28695
	0.28685
	0.2843
	0.285
	0.2824
	0.2823
	0.28195
	0.2845
	0.28275
	0.28095
	0.2816
	0.2804
	0.2806
	0.2832
	0.28425
	0.28395
	0.2835
	0.28295
	0.28055
	0.27885
	0.2779
	0.279
	0.2824
	0.2802
	0.28165
	0.2846
	0.28145
	0.28475
	0.2856
	0.2873
	0.28665
	0.28855
	0.2894
	0.29155
	0.29305
	0.29085
	0.29145
	0.2885
	0.2904
	0.29045
	0.28705
	0.28245
	0.28435
	0.28605
	0.2841
	0.28635
	0.28805
	0.2889
	0.2891
	0.2925
	0.28935
	0.2873
	0.2918
	0.2909
	0.2917
	0.2886
	0.2858
	0.28565
	0.2841
	0.288
	0.2901
	0.2915
	0.2881
	0.2867
	0.28315
	0.27815
	0.27255
	0.2758
	0.27665
	0.2775
	0.27505
	0.2773
	0.28005
	0.28205
	0.28355
	0.2851
	0.28545
	0.28545
	0.2867
	0.29045
	0.29315
	0.2938
	0.2962
	0.2986
	0.29815
	0.29575
	0.29855
	0.29395
	0.2896
	0.2853
	0.28575
	0.2838
	0.28375
	0.28195
	0.28445
	0.28625
	0.2909
	0.2904
	0.28945
	0.2926
	0.2903
	0.29215
	0.292
	0.29035
	0.2934
	0.2964
	0.2968
	0.29745
	0.29675
	0.29145
	0.29285
	0.2919
	0.29135
	0.29085
	0.28825
	0.28835
	0.2935
	0.2925
	0.29295
	0.29175
	0.28945
	0.2912
	0.2948
	0.2982
	0.29515
	0.2921
	0.2938
	0.2935
	0.2904
	0.29165
	0.29
	0.28885
	0.2905
	0.2956
	0.29665
	0.29925
	0.29845
	0.29695
	0.29385
	0.29545
	0.2948
	0.29445
	0.29205
	0.2915
	0.2919
	0.2923
	0.29495
	0.2947
	0.2937
	0.29465
	0.295
	0.29555
	0.2912
	0.29315
	0.2952
	0.2931
	0.2921
	0.2901
	0.2873
	0.28605
	0.2887
	0.293
	0.2907
	0.2923
	0.29595
	0.29635
	0.29505
	0.29485
	0.29395
	0.2911
	0.2924
	0.28995
	0.28745
	0.28565
	0.2829
	0.2847
	0.28805
	0.28755
	0.28975
	0.28995
	0.292
	0.29735
	0.29705
	0.29475
	0.29255
	0.28915
	0.2865
	0.28465
	0.2819
	0.2776
	0.27975
	0.2824
	0.28315
	0.2866
	0.28555
	0.2839
	0.2851
	0.2848
	0.28735
	0.2881
	0.286
	0.2852
	0.2897
	0.293
	0.2949
	0.2975
	0.29805
	0.29715
	0.2972
	0.29845
	0.2989
	0.2951
	0.2951
	0.29475
	0.2935
	0.29275
	0.29485
	0.30025
	0.2971
	0.29705
	0.2936
	0.289
	0.28565
	0.28285
	0.28265
	0.28455
	0.28325
	0.2816
	0.2846
	0.2824
	0.2827
	0.28215
	0.28135
	0.2854
	0.2837
	0.29045
	0.294
	0.29715
	0.2988
	0.3008
	0.29965
	0.30065
	0.3014
	0.29865
	0.29415
	0.2917
	0.2874
	0.2873
	0.28885
	0.2862
	0.28325
	0.28075
	0.2794
	0.2757
	0.27605
	0.27935
	0.28365
	0.28695
	0.2867
	0.28895
	0.28885
	0.2912
	0.2959
	0.29715
	0.2933
	0.29115
	0.2893
	0.28815
	0.285
	0.29065
	0.29215
	0.29285
	0.29515
	0.2951
	0.2963
	0.29675
	0.29595
	0.29455
	0.29635
	0.3
	0.30005
	0.2993
	0.3041
	0.30305
	0.3065
	0.3024
	0.30035
	0.2945
	0.29425
	0.2918
	0.29065
	0.28885
	0.29115
	0.2907
	0.28865
	0.29025
	0.29355
	0.2961
	0.29915
	0.3036
	0.3033
	0.3039
	0.3069
	0.30995
	0.30975
	0.3118
	0.3115
	0.3113
	0.3087
	0.30485
	0.3024
	0.29905
	0.2981
	0.29905
	0.29565
	0.2945
	0.292
	0.29155
	0.29285
	0.29235
	0.29445
	0.2966
	0.29725
	0.2975
	0.2955
	0.29845
	0.2952
	0.29845
	0.2955
	0.2942
	0.28955
	0.2917
	0.29325
	0.29275
	0.2909
	0.28895
	0.29175
	0.2941
	0.29205
	0.28965
	0.29015
	0.28305
	0.28265
	0.2829
	0.2817
	0.28075
	0.28075
	0.27955
	0.28025
	0.2811
	0.27695
	0.278
	0.27765
	0.27825
	0.2805
	0.28025
	0.28025
	0.28385
	0.2836
	0.28735
	0.2864
	0.2888
	0.28885
	0.2914
	0.29245
	0.29
	0.29085
	0.28955
	0.2874
	0.28405
	0.28495
	0.28445
	0.286
	0.2865
	0.28695
	0.28735
	0.289
	0.2909
	0.28635
	0.28415
	0.28335
	0.28465
	0.28245
	0.28545
	0.29045
	0.2942
	0.2953
	0.29525
	0.29885
	0.3009
	0.29875
	0.2986
	0.2967
	0.301
	0.29525
	0.2957
	0.293
	0.29125
	0.2887
	0.2905
	0.2878
	0.2908
	0.29115
	0.2928
	0.29615
	0.29755
	0.29725
	0.29515
	0.29395
	0.2944
	0.29325
	0.294
	0.2973
	0.29
	0.29185
	0.2926
	0.2987
	0.30075
	0.3007
	0.30155
	0.3013
	0.30165
	0.3019
	0.30295
	0.2992
	0.2995
	0.3
	0.29565
	0.2952
	0.2934
	0.2894
	0.28905
	0.28755
	0.28945
	0.2896
	0.2923
	0.29005
	0.28985
	0.29315
	0.2939
	0.29445
	0.2935
	0.2891
	0.2855
	0.28205
	0.2827
	0.28295
	0.27985
	0.28055
	0.27645
	0.274
	0.27715
	0.28015
	0.2809
	0.27945
	0.2798
	0.2787
	0.27545
	0.27085
	0.27105
	0.2697
	0.27495
	0.277
	0.2798
	0.2776
	0.2788
	0.27655
	0.27555
	0.2773
	0.27765
	0.2763
	0.2765
	0.2815
	0.2848
	0.28535
	0.2843
	0.28915
	0.2956
	0.29915
	0.29935
	0.29645
	0.29535
	0.2937
	0.2962
	0.29575
	0.2923
	0.29475
	0.29665
	0.29665
	0.2949
	0.2946
	0.293
	0.288
	0.28795
	0.28975
	0.2925
	0.2918
	0.2962
	0.29715
	0.2979
	0.2942
	0.29345
	0.29045
	0.28975
	0.28575
	0.28735
	0.2817
	0.27775
	0.27605
	0.2727
	0.27435
	0.27855
	0.28075
	0.28515
	0.28825
	0.2883
	0.28465
	0.2854
	0.2897
	0.2851
	0.28635
	0.28685
	0.28625
	0.28825
	0.28635
	0.28665
	0.28455
	0.28375
	0.283
	0.28445
	0.2876
	0.2877
	0.28995
	0.29065
	0.2913
	0.29245
	0.29475
	0.29505
	0.3
	0.30015
	0.30035
	0.29965
	0.295
	0.29445
	0.2942
	0.29155
	0.29195
	0.289
	0.28895
	0.2888
	0.2881
	0.2874
	0.2866
	0.2895
	0.28645
	0.2892
	0.29335
	0.29405
	0.2967
	0.2956
	0.2965
	0.29895
	0.2985
	0.2956
	0.294
	0.2931
	0.2922
	0.29265
	0.29045
	0.28995
	0.2923
	0.2945
	0.29555
	0.29655
	0.2965
	0.2946
	0.29375
	0.2968
	0.2951
	0.29625
	0.29645
	0.29565
	0.2915
	0.2932
	0.2931
	0.29145
	0.2909
	0.2871
	0.28645
	0.28665
	0.2908
	0.28915
	0.2893
	0.28865
	0.2894
	0.2869
	0.286
	0.29275
	0.29135
	0.29125
	0.29115
	0.2911
	0.2915
	0.29505
	0.29655
	0.2941
	0.29185
	0.2935
	0.29125
	0.28895
	0.2903
	0.28935
	0.29145
	0.29295
	0.2952
	0.2937
	0.29465
	0.29825
	0.2994
	0.30045
	0.30045
	0.29575
	0.2974
	0.2949
	0.29345
	0.28635
	0.2885
	0.2883
	0.29085
	0.2897
	0.2916
	0.2928
	0.29345
	0.29495
	0.29635
	0.29325
	0.2916
	0.2904
	0.29135
	0.29245
	0.2967
	0.2945
	0.296
	0.29705
	0.2951
	0.2945
	0.2926
	0.2916
	0.29165
	0.2894
	0.2904
	0.2888
	0.28325
	0.28535
	0.2893
	0.2872
	0.28675
	0.28515
	0.2865
	0.28775
	0.28795
	0.2879
	0.28715
	0.2874
	0.28715
	0.2869
	0.28425
	0.2843
	0.2838
	0.2825
	0.28265
	0.2807
	0.2829
	0.28435
	0.2839
	0.28335
	0.2831
	0.2797
	0.28235
	0.2841
	0.2886
	0.28925
	0.2883
	0.2894
	0.2859
	0.28565
	0.28675
	0.28755
	0.288
	0.2888
	0.29155
	0.29085
	0.29355
	0.2963
	0.2934
	0.293
	0.2951
	0.2953
	0.29315
	0.2877
	0.2837
	0.28585
	0.28615
	0.28645
	0.2868
	0.28665
	0.28335
	0.284
	0.28375
	0.28285
	0.2797
	0.2803
	0.27975
	0.2795
	0.281
	0.27945
	0.2799
	0.2821
	0.2811
	0.2798
	0.28315
	0.2835
	0.28135
	0.2802
	0.28035
	0.27965
	0.2778
	0.2802
	0.2777
	0.2779
	0.2761
	0.27685
	0.2785
	0.28235
	0.2838
	0.286
	0.2876
	0.29125
	0.29495
	0.29665
	0.2963
	0.29685
	0.29435
	0.29135
	0.28915
	0.29015
	0.2882
	0.2865
	0.2861
	0.2867
	0.2839
	0.2837
	0.2855
	0.28375
	0.28255
	0.28205
	0.28045
	0.2815
	0.28165
	0.2808
	0.2832
	0.2862
	0.28945
	0.2923
	0.29315
	0.29675
	0.2991
	0.2994
	0.29735
	0.2926
	0.29075
	0.29015
	0.28895
	0.2881
	0.2834
	0.28105
	0.28005
	0.28365
	0.2856
	0.2865
	0.2848
	0.2817
	0.28525
	0.28745
	0.28375
	0.2844
	0.2863
	0.2875
	0.289
	0.29195
	0.2949
	0.29655
	0.29745
	0.2949
	0.2943
	0.2883
	0.28525
	0.28235
	0.2835
	0.2849
	0.28725
	0.28665
	0.2845
	0.2858
	0.28575
	0.28525
	0.2853
	0.28605
	0.2838
	0.2821
	0.282
	0.28595
	0.28025
	0.2767
	0.2795
	0.27485
	0.2718
	0.2721
	0.27095
	0.27165
	0.27435
	0.27945
	0.27785
	0.2787
	0.282
	0.28245
	0.28445
	0.2835
	0.2809
	0.27885
	0.27855
	0.27965
	0.28
	0.28245
	0.2849
	0.28635
	0.28735
	0.2877
	0.2864
	0.2872
	0.29135
	0.2908
	0.29255
	0.2899
	0.2903
	0.2901
	0.28705
	0.2869
	0.2879
	0.28725
	0.2893
	0.2929
	0.2973
	0.2937
	0.2925
	0.2922
	0.2918
	0.2941
	0.29425
	0.2965
	0.29355
	0.2938
	0.29285
	0.29465
	0.293
	0.2946
	0.2985
	0.29735
	0.2951
	0.2959
	0.29575
	0.29415
	0.2923
	0.2921
	0.2956
	0.2922
	0.29345
	0.2925
	0.29175
	0.2932
	0.29145
	0.29245
	0.29305
	0.2898
	0.28705
	0.2882
	0.29245
	0.29315
	0.2936
	0.29285
	0.29315
	0.2941
	0.29485
	0.29465
	0.29085
	0.28865
	0.2905
	0.2918
	0.29455
	0.2945
	0.29115
	0.28865
	0.28775
	0.2838
	0.28735
	0.28495
	0.28235
	0.2818
	0.28295
	0.28575
	0.28515
	0.28135
	0.28145
	0.2798
	0.2799
	0.27995
	0.28725
	0.28895
	0.2906
	0.2903
	0.29005
	0.2908
	0.29195
	0.29545
	0.2963
	0.29525
	0.29295
	0.29425
	0.2945
	0.298
	0.2972
	0.29545
	0.29475
	0.29315
	0.28995
	0.29145
	0.29555
	0.2972
	0.2955
	0.29695
	0.2968
	0.29895
	0.29645
	0.2948
	0.29525
	0.2909
	0.2875
	0.2884
	0.2881
	0.29045
	0.28665
	0.2843
	0.28125
	0.2801
	0.2789
	0.2749
	0.2766
	0.2731
	0.27195
	0.2747
	0.2752
	0.27465
	0.28005
	0.2802
	0.2783
	0.278
	0.27985
	0.27525
	0.27415
	0.2677
	0.26915
	0.26905
	0.26975
	0.2721
	0.2738
	0.27755
	0.2805
	0.2795
	0.28075
	0.2849
	0.2886
	0.28465
	0.28445
	0.2855
	0.2882
	0.29165
	0.28845
	0.29015
	0.2884
	0.28505
	0.2823
	0.27975
	0.28215
	0.28415
	0.2863
	0.28465
	0.2831
	0.28445
	0.28645
	0.29105
	0.29055
	0.28745
	0.28565
	0.28565
	0.2875
	0.2841
	0.28085
	0.27925
	0.27985
	0.2815
	0.28335
	0.2843
	0.28585
	0.28825
	0.2868
	0.28545
	0.28455
	0.28725
	0.2898
	0.2898
	0.29625
	0.29615
	0.29605
	0.29475
	0.29175
	0.2951
	0.2972
	0.29415
	0.29745
	0.2975
	0.2956
	0.2954
	0.29465
	0.29485
	0.29375
	0.29635
	0.2985
	0.3002
	0.2968
	0.29795
	0.2983
	0.29715
	0.2964
	0.2931
	0.2879
	0.2862
	0.2859
	0.28655
	0.2858
	0.28345
	0.2852
	0.285
	0.28
	0.279
	0.28055
	0.2818
	0.27985
	0.2829
	0.28235
	0.28395
	0.2843
	0.28585
	0.2849
	0.28535
	0.28545
	0.28775
	0.2913
	0.293
	0.28675
	0.28825
	0.29055
	0.29285
	0.2925
	0.29315
	0.2913
	0.29365
	0.2955
	0.29515
	0.29885
	0.30455
	0.30395
	0.30275
	0.3022
	0.3005
	0.3035
	0.3035
	0.30675
	0.30205
	0.299
	0.2946
	0.29055
	0.2878
	0.28745
	0.28675
	0.2834
	0.282
	0.28525
	0.28855
	0.29285
	0.2953
	0.29745
	0.295
	0.2918
	0.2888
	0.2845
	0.28465
	0.2882
	0.28585
	0.2824
	0.28535
	0.2857
	0.2932
	0.2945
	0.29135
	0.2916
	0.2939
	0.2895
	0.2928
	0.2875
	0.2889
	0.2931
	0.2924
	0.29385
	0.29475
	0.2912
	0.2889
	0.2894
	0.28655
	0.2833
	0.28275
	0.27855
	0.2748
	0.2735
	0.27095
	0.2748
	0.2742
	0.27555
	0.27415
	0.27305
	0.27585
	0.2789
	0.2814
	0.2794
	0.2758
	0.2765
	0.27705
	0.2759
	0.27935
	0.282
	0.27955
	0.2783
	0.2795
	0.2808
	0.28155
	0.28235
	0.2853
	0.2916
	0.29235
	0.29385
	0.29175
	0.2918
	0.29245
	0.2892
	0.2903
	0.2897
	0.28865
	0.2903
	0.2929
	0.2904
	0.2901
	0.2894
	0.2907
	0.293
	0.29045
	0.2865
	0.2853
	0.2854
	0.2865
	0.28495
	0.28635
	0.28405
	0.2851
	0.28555
	0.2877
	0.28835
	0.2905
	0.2914
	0.28565
	0.28895
	0.291
	0.2924
	0.29115
	0.28785
	0.2855
	0.2833
	0.28205
	0.2847
	0.28495
	0.2825
	0.28245
	0.2784
	0.27945
	0.27805
	0.2779
	0.27915
	0.2825
	0.2808
	0.2813
	0.28135
	0.2807
	0.2805
	0.28065
	0.27735
	0.2749
	0.2733
	0.2747
	0.27715
	0.28115
	0.2846
	0.2855
	0.28555
	0.28545
	0.2882
	0.2868
	0.28865
	0.2888
	0.28815
	0.28985
	0.29215
	0.28855
	0.286
	0.28435
	0.2859
	0.2838
	0.28625
	0.2821
	0.2823
	0.2832
	0.2819
	0.28125
	0.2841
	0.2834
	0.2833
	0.28375
	0.2867
	0.28935
	0.2903
	0.2913
	0.2923
	0.2917
	0.2902
	0.29005
	0.2876
	0.28875
	0.2889
	0.29125
	0.29205
	0.29165
	0.2903
	0.29305
	0.29035
	0.2862
	0.29065
	0.28995
	0.2931
[truncated: 7 more rows]

## Sheet: One sim - SD fil density
1.11301e-16	1.11301e-16
0.0422833	0.0535191
0.0618943	0.0701104
0.0715407	0.0697154
0.0750569	0.0726608
0.0771588	0.070881
0.0779572	0.0666231
0.0783238	0.0655987
0.0799847	0.060663
0.0812385	0.0631722
0.0839385	0.0641449
0.0859732	0.0636771
0.0933535	0.067284
0.0964743	0.0672447
0.098208	0.0719506
0.103168	0.0754268
0.108875	0.0801321
0.116256	0.0835584
0.126479	0.0827614
0.13061	0.0811259
0.137724	0.083059
0.151392	0.0845428
0.159594	0.0865885
0.164966	0.0883019
0.170908	0.0889
0.174606	0.0900729
0.17817	0.0937226
0.183458	0.0917309
0.189345	0.0889723
0.19674	0.0941031
0.203279	0.0957089
0.207381	0.0996829
0.21208	0.101637
0.216038	0.102442
0.216324	0.0998083
0.219066	0.0980819
0.221845	0.0987672
0.22258	0.0952816
0.224604	0.0944811
0.232694	0.0957945
0.240934	0.091001
0.246827	0.0871929
0.255138	0.0943508
0.262081	0.0924278
0.265285	0.0943785
0.269675	0.0947781
0.267927	0.0972211
0.264442	0.0972874
0.265376	0.0924278
0.27003	0.0903611
0.276517	0.0918623
0.27937	0.0923349
0.281199	0.0915571
0.283723	0.0959114
0.28676	0.0971467
0.289152	0.0995189
0.296145	0.09571
0.293403	0.0944584
0.294187	0.0902935
0.296441	0.0872654
0.300886	0.0869587
0.306225	0.0867955
0.30486	0.0849087
0.30796	0.0923602
0.312201	0.0934949
0.315307	0.0911274
0.315321	0.0925585
0.313495	0.0931383
0.319224	0.0929324
0.320984	0.0943158
0.319757	0.0944399
0.32314	0.0943254
0.328471	0.093677
0.326045	0.0881935
0.327041	0.0900764
0.330232	0.0924064
0.337076	0.0966437
0.339069	0.102326
0.343879	0.0978449
0.346239	0.0951108
0.344323	0.0935068
0.343424	0.0926804
0.33909	0.091058
0.341716	0.0875918
0.346332	0.0866772
0.344086	0.0859786
0.346405	0.0876236
0.3562	0.0881519
0.35688	0.0911043
0.361324	0.0868499
0.365208	0.0870538
0.364486	0.0853941
0.36957	0.0899385
0.371186	0.0904778
0.369221	0.0890142
0.374606	0.090022
0.366593	0.0884437
0.365768	0.0869471
0.370257	0.0890316
0.371388	0.0841272
0.378267	0.0826231
0.377533	0.0783421
0.383614	0.0811399
0.391299	0.0856554
0.395913	0.0829493
0.401775	0.0835217
0.403093	0.0900162
0.40419	0.0896839
0.407789	0.0895332
0.414687	0.0901331
0.414775	0.0839693
0.416849	0.0899976
0.419697	0.0911016
0.422393	0.0909712
0.42072	0.0945842
0.425031	0.0970308
0.419169	0.0983818
0.420925	0.0988232
0.415926	0.0998036
0.410093	0.0953328
0.415124	0.0947092
0.420621	0.09569
0.418022	0.0934013
0.414016	0.0915442
0.418958	0.0961176
0.422336	0.0982447
0.429982	0.102492
0.436716	0.0994257
0.437711	0.103256
0.440492	0.0998852
0.440463	0.100419
0.44375	0.099275
0.45019	0.0971487
0.454042	0.0991749
0.460788	0.0969794
0.463508	0.0967448
0.471045	0.0993227
0.470159	0.0977876
0.468157	0.0914131
0.463272	0.0951873
0.458304	0.0993142
0.462092	0.0973559
0.453999	0.0943082
0.454931	0.0852847
0.458193	0.0817679
0.460383	0.0846177
0.467527	0.0877493
0.465686	0.0903488
0.462991	0.0933842
0.462386	0.0919995
0.457994	0.0940478
0.460355	0.0951879
0.458069	0.0905942
0.463098	0.09021
0.467874	0.0953267
0.475044	0.0929479
0.473368	0.0895645
0.472565	0.0899131
0.478915	0.0873953
0.4826	0.0874737
0.482793	0.0911015
0.476176	0.0925233
0.47516	0.0904321
0.474036	0.089971
0.471304	0.0953022
0.46791	0.100076
0.466738	0.101513
0.462486	0.104326
0.461587	0.102883
0.462786	0.0998858
0.458002	0.0964691
0.455371	0.0939598
0.454177	0.0950216
0.449803	0.0925852
0.449399	0.0932221
0.451955	0.0969711
0.455099	0.090426
0.45611	0.0910348
0.457581	0.0869358
0.463112	0.0875655
0.461119	0.0857626
0.462498	0.090114
0.456599	0.0920366
0.459184	0.0896671
0.457495	0.0916495
0.460068	0.0951555
0.474605	0.0974547
0.480981	0.098458
0.483298	0.0960367
0.484039	0.0937858
0.491487	0.0939173
0.48951	0.0958799
0.487089	0.0942996
0.48191	0.0949149
0.477338	0.0922918
0.483377	0.0950789
0.484493	0.0991527
0.491151	0.100278
0.494025	0.0986812
0.493649	0.0953016
0.494085	0.0964709
0.495533	0.0968158
0.499569	0.097998
0.505713	0.0967717
0.506283	0.0963218
0.504248	0.0970619
0.504244	0.105384
0.497692	0.104156
0.496775	0.105286
0.497215	0.10604
0.496788	0.102325
0.496584	0.101069
0.490682	0.103029
0.485982	0.102319
0.495667	0.101247
0.493579	0.0991919
0.492866	0.0936227
0.496486	0.091427
0.495986	0.0898855
0.503024	0.089364
0.500062	0.0926852
0.499466	0.0944306
0.501517	0.0895571
0.501786	0.0900518
0.501461	0.0878441
0.5066	0.0868918
	0.0896167
	0.089004
	0.0959789
	0.0924067
	0.0989543
	0.100371
	0.100712
	0.0931093
	0.0958931
	0.099066
	0.101169
	0.0962081
	0.0946126
	0.0956856
	0.0956526
	0.097732
	0.0964501
	0.0947254
	0.0967461
	0.0971395
	0.0959804
	0.0936792
	0.0936204
	0.0945647
	0.0867239
	0.0839155
	0.0835859
	0.086121
	0.0895732
	0.0904508
	0.0892082
	0.0882852
	0.0893849
	0.0893204
	0.100082
	0.101865
	0.101288
	0.095763
	0.0884017
	0.093806
	0.0923092
	0.0921469
	0.0928705
	0.0952457
	0.0930844
	0.091455
	0.0939676
	0.0953636
	0.0927648
	0.0980245
	0.100801
	0.10614
	0.101779
	0.0998177
	0.101565
	0.0998994
	0.104376
	0.103615
	0.104379
	0.105635
	0.10433
	0.103624
	0.101239
	0.102574
	0.0985469
	0.0978101
	0.101831
	0.10226
	0.100748
	0.0955638
	0.096232
	0.0999231
	0.0995944
	0.105784
	0.102423
	0.101835
	0.0995693
	0.0979225
	0.0972971
	0.0982843
	0.0913587
	0.0908573
	0.087115
	0.0842585
	0.0895313
	0.0901701
	0.0902045
	0.0892793
	0.0875264
	0.0863427
	0.0851587
	0.0857937
	0.0919987
	0.0908054
	0.0916658
	0.0936205
	0.0907475
	0.0904728
	0.0933933
	0.0983992
	0.0969818
	0.0942614
	0.0932428
	0.0953008
	0.0989743
	0.103678
	0.0972595
	0.0971439
	0.0941589
	0.0973777
	0.100493
	0.0984091
	0.0985003
	0.095058
	0.0955334
	0.0955365
	0.101249
	0.0995028
	0.0980297
	0.0940247
	0.0888486
	0.0874483
	0.088069
	0.0851117
	0.0862773
	0.0853137
	0.0910242
	0.0897516
	0.089625
	0.0899623
	0.0903778
	0.0905898
	0.0877683
	0.0884196
	0.0903649
	0.0960228
	0.0957885
	0.0927945
	0.0898078
	0.0917999
	0.0955692
	0.0964807
	0.0955143
	0.0918217
	0.0913534
	0.0884484
	0.0935581
	0.0904505
	0.0916666
	0.0883677
	0.0866001
	0.0832493
	0.0852814
	0.0860891
	0.0855954
	0.0883534
	0.0865659
	0.0827758
	0.0817261
	0.0861834
	0.0868159
	0.0866235
	0.0876393
	0.0876719
	0.0912282
	0.0884001
	0.0876031
	0.0878577
	0.0887256
	0.0866099
	0.0843382
	0.0846808
	0.0859494
	0.085322
	0.0826459
	0.08289
	0.0809308
	0.0834666
	0.0812404
	0.0829625
	0.0895694
	0.0870633
	0.0832584
	0.0821003
	0.0792881
	0.0831944
	0.084299
	0.0911261
	0.0895806
	0.0888141
	0.0864054
	0.0851023
	0.0848886
	0.0839983
	0.0850373
	0.0867937
	0.0911893
	0.0933394
	0.0951077
	0.0899679
	0.0893527
	0.0940739
	0.0917966
	0.0897119
	0.091694
	0.0934615
	0.0940828
	0.0959619
	0.0970986
	0.0991784
	0.100713
	0.102551
	0.101012
	0.0967068
	0.0931781
	0.094134
	0.0967948
	0.0963124
	0.0951487
	0.0968862
	0.0959133
	0.0920932
	0.0883762
	0.0903318
	0.0901255
	0.0927682
	0.0959407
	0.0964131
	0.092568
	0.0923794
	0.0878873
	0.0920314
	0.0940341
	0.0945013
	0.0920513
	0.090102
	0.093667
	0.0898978
	0.0862786
	0.0860022
	0.0902198
	0.0903316
	0.0905988
	0.0905127
	0.0894083
	0.0904313
	0.0877672
	0.0864135
	0.0871773
	0.0836527
	0.0840172
	0.0882128
	0.0876838
	0.0951813
	0.0990457
	0.0993863
	0.0983884
	0.0972939
	0.0957016
	0.0957845
	0.0973515
	0.0953949
	0.0900479
	0.0936539
	0.0941879
	0.0936919
	0.090609
	0.0905111
	0.0934943
	0.0946447
	0.0913299
	0.0901728
	0.0903805
	0.0988492
	0.102732
	0.105466
	0.0996955
	0.0969704
	0.0936925
	0.0939141
	0.0962842
	0.0970008
	0.102944
	0.103749
	0.103563
	0.108066
	0.105368
	0.10214
	0.0948285
	0.0902938
	0.088698
	0.0845191
	0.0841059
	0.0882723
	0.089927
	0.0926829
	0.0921806
	0.0916793
	0.0907106
	0.0889252
	0.0942599
	0.0955003
	0.0949218
	0.0935592
	0.0946745
	0.0916832
	0.0962254
	0.0909719
	0.0920004
	0.0912284
	0.0901144
	0.0928254
	0.0982562
	0.0969662
	0.0941276
	0.0910861
	0.0914206
	0.0890937
	0.0917408
	0.0905683
	0.0937933
	0.0959449
	0.0962617
	0.0946041
	0.0923735
	0.0885834
	0.0908234
	0.0934035
	0.0911913
	0.0946137
	0.0943147
	0.0942192
	0.0961373
	0.0976411
	0.0990319
	0.099335
	0.0977135
	0.0965015
	0.102219
	0.101377
	0.101293
	0.0973663
	0.0941301
	0.0972904
	0.096245
	0.0960357
	0.0938458
	0.0953848
	0.0941599
	0.0934534
	0.087609
	0.097814
	0.100158
	0.0981737
	0.0953109
	0.0951036
	0.0971814
	0.102737
	0.0999214
	0.101971
	0.102766
	0.0982405
	0.0979497
	0.0966005
	0.0989696
	0.100809
	0.104273
	0.102468
	0.104331
	0.103173
	0.0993954
	0.0947665
	0.0941759
	0.0941381
	0.0900101
	0.0919307
	0.0923855
	0.0911664
	0.0924207
	0.090645
	0.0851081
	0.0868523
	0.0874919
	0.0875076
	0.0909314
	0.0881303
	0.0874885
	0.0879822
	0.0874682
	0.0919798
	0.088615
	0.0844964
	0.0884764
	0.0878321
	0.0893327
	0.0982733
	0.0995896
	0.101976
	0.0981892
	0.102615
	0.101506
	0.0959922
	0.0991836
	0.0961447
	0.0935504
	0.0961416
	0.0995366
	0.100287
	0.0966196
	0.0989261
	0.0903803
	0.0937596
	0.101293
	0.10199
	0.0973446
	0.0995417
	0.0961113
	0.0919836
	0.0883785
	0.0914506
	0.0868442
	0.082902
	0.08487
	0.086277
	0.0890921
	0.0857127
	0.086373
	0.0867587
	0.0871963
	0.0893335
	0.0905216
	0.0952415
	0.0929848
	0.0944441
	0.0902412
	0.0917271
	0.0943004
	0.0886141
	0.0919575
	0.0986059
	0.102211
	0.106995
	0.105598
	0.104635
	0.0984348
	0.0972419
	0.0963225
	0.0958901
	0.0985199
	0.101108
	0.10282
	0.100385
	0.0962613
	0.0984368
	0.100537
	0.100335
	0.0953954
	0.09271
	0.0921624
	0.0937981
	0.0982683
	0.100201
	0.101177
	0.0974076
	0.100251
	0.103318
	0.0999487
	0.102174
	0.102962
	0.10248
	0.10068
	0.0959527
	0.0918912
	0.0949421
	0.0966346
	0.0975066
	0.0959189
	0.0977002
	0.0959757
	0.0958429
	0.0965641
	0.0898501
	0.0900774
	0.0898127
	0.0889892
	0.0908939
	0.0954676
	0.0948389
	0.0977225
	0.0971671
	0.099632
	0.104761
	0.107416
	0.105684
	0.0995089
	0.0958195
	0.0907047
	0.0901475
	0.0873047
	0.0830997
	0.0818234
	0.0836686
	0.0838165
	0.0886041
	0.0894612
	0.0897006
	0.0889803
	0.0881873
	0.0871616
	0.0928889
	0.0928097
	0.0907618
	0.0839658
	0.0878111
	0.085129
	0.0856409
	0.0898897
	0.0871546
	0.0903516
	0.0887628
	0.0840545
	0.0879278
	0.0908683
	0.0892314
	0.0864771
	0.0875275
	0.0875105
	0.0876906
	0.0888632
	0.0879161
	0.0895045
	0.0895058
	0.0878896
	0.0859284
	0.0870559
	0.087812
	0.0873216
	0.0851876
	0.0854236
	0.0877655
	0.0903839
	0.0883042
	0.0912729
	0.0947899
	0.093775
	0.0931816
	0.0894188
	0.0879861
	0.0850557
	0.0826192
	0.0811135
	0.0788713
	0.0851301
	0.0863741
	0.0875356
	0.0877966
	0.0895819
	0.0902325
	0.0900684
	0.0863095
	0.0875043
	0.0902134
	0.0897355
	0.0910525
	0.0872646
	0.0855274
	0.0885879
	0.0912129
	0.0908586
	0.0957593
	0.0921096
	0.0917359
	0.0920515
	0.0928584
	0.0945451
	0.0885222
	0.0922655
	0.0927702
	0.0967759
	0.0966005
	0.0948721
	0.0955939
	0.0930947
	0.0925621
	0.0930715
	0.0918093
	0.0925072
	0.0907319
	0.0881712
	0.0901956
	0.0944466
	0.0925657
	0.0956808
	0.0989344
	0.0988651
	0.0998813
	0.0987556
	0.0980505
	0.092963
	0.0901614
	0.0920812
	0.0897424
	0.0902075
	0.0978395
	0.0976016
	0.100872
	0.0982707
	0.0981548
	0.0947265
	0.096839
	0.0987453
	0.0991066
	0.0990019
	0.104133
	0.102898
	0.10146
	0.0942305
	0.0946028
	0.0929062
	0.0953933
	0.100887
	0.102294
	0.0999084
	0.0971836
	0.0972009
	0.100425
	0.0957423
	0.0946604
	0.0959084
	0.0949911
	0.0960766
	0.0933732
	0.096344
	0.092866
	0.0872332
	0.0888484
	0.0924689
	0.097382
	0.0989583
	0.0960737
	0.0949116
	0.0943305
	0.0960142
	0.0998556
	0.100396
	0.0974349
	0.0981753
	0.0946545
	0.0961615
	0.092801
	0.089092
	0.0877542
	0.0878998
	0.0886095
	0.0862724
	0.0849475
	0.0921377
	0.0906831
	0.0888445
	0.0943265
	0.0917814
	0.0869966
	0.0871467
	0.0898013
	0.087399
	0.0886957
	0.0911126
	0.0873606
	0.0917332
	0.0954193
	0.0941292
	0.0910713
	0.093721
	0.0938303
	0.0954554
	0.0953122
	0.0945977
	0.0901305
	0.0871479
	0.088773
	0.0930418
	0.0904706
	0.0873886
	0.0871987
	0.0907584
	0.0949726
	0.0929392
	0.0942329
	0.0934514
	0.0913605
	0.0932198
	0.0928975
	0.0913766
	0.0926494
	0.0943732
	0.093081
	0.0959317
	0.0990071
	0.0962578
	0.0951932
	0.0939113
	0.0945158
	0.0947275
	0.0927183
	0.0935712
	0.0941451
	0.0920179
	0.0912861
	0.0938854
	0.0915088
	0.0913492
	0.0945176
	0.0960214
	0.0957488
	0.0941599
	0.0962393
	0.0982427
	0.0986958
	0.0979596
	0.104659
	0.101353
	0.102599
	0.104237
	0.106165
	0.109108
	0.108382
	0.109027
	0.109845
	0.110161
	0.101269
	0.100985
	0.101662
	0.0985033
	0.103295
	0.0998129
	0.0960838
	0.0915662
	0.0900856
	0.0919375
	0.0993987
	0.0973719
	0.10247
	0.100735
	0.0932512
	0.100698
	0.104895
	0.108532
	0.102925
	0.105803
	0.102454
	0.105063
	0.103826
	0.0997115
	0.0961222
	0.0978929
	0.0969911
	0.0940849
	0.100076
	0.103601
	0.0986285
	0.0976144
	0.0976901
	0.0968421
	0.0957116
	0.0962413
	0.0954344
	0.099001
	0.0972491
	0.0987225
	0.0985889
	0.0975249
	0.0997393
	0.101483
	0.0984356
	0.0961948
	0.0991041
	0.105835
	0.101877
	0.102751
	0.108321
	0.107635
	0.108331
	0.110472
	0.112533
	0.114387
	0.114322
	0.111413
	0.113071
	0.114251
	0.117098
	0.109469
	0.104915
	0.104982
	0.101317
	0.0997597
	0.100543
	0.0945114
	0.0937196
	0.0941332
	0.0913774
	0.0899088
	0.0922209
	0.0930095
	0.0979933
	0.0999117
	0.101431
	0.102975
	0.104726
	0.108854
	0.105121
	0.106916
	0.107812
	0.107668
	0.106994
	0.11033
	0.115931
	0.112269
	0.108453
	0.110776
	0.10993
	0.105828
	0.105528
	0.101924
	0.0983716
	0.103515
	0.103297
	0.0993603
	0.100703
	0.102995
	0.103709
	0.100393
	0.0985622
	0.0945965
	0.0960828
	0.0995724
	0.100766
	0.101323
	0.101713
	0.102086
	0.0995634
	0.0945824
	0.0951061
	0.0948362
	0.096513
	0.0970541
	0.100338
	0.097172
	0.0988542
	0.0998057
	0.0996198
	0.0961897
	0.0960291
	0.0979262
	0.0962624
	0.0983376
	0.0961674
	0.0971881
	0.0979818
	0.0988567
	0.100392
	0.0937333
	0.0909414
	0.0935532
	0.0960148
	0.094531
	0.0964414
	0.0998676
	0.0987003
	0.101899
	0.099456
	0.100369
	0.102001
	0.102433
	0.101117
	0.0967824
	0.0993182
	0.0922761
	0.0878226
	0.091058
	0.0928607
	0.0925393
	0.095817
	0.0977421
	0.0991177
	0.0979102
	0.0942999
	0.0943808
	0.0956763
	0.0911141
	0.0889033
	0.0928763
	0.0966447
	0.0978297
	0.0962581
	0.0972298
	0.0983017
	0.100691
	0.10546
	0.101413
	0.103482
	0.0996428
	0.0976822
	0.0984962
	0.0968807
	0.100364
	0.0941772
	0.0927196
	0.0882795
	0.0952582
	0.0946836
	0.0970901
	0.100091
	0.0965597
	0.0994592
	0.0996047
	0.101921
	0.100075
	0.0943686
	0.0947498
	0.0954331
	0.0963766
	0.102534
	0.100871
	0.0997337
	0.0986249
	0.100807
	0.106114
	0.10435
	0.103701
	0.103396
	0.106151
	0.0974313
	0.0978811
	0.0965556
	0.0974641
	0.101055
	0.0999577
	0.10319
	0.100433
	0.101341
	0.100504
	0.103824
	0.10113
	0.100145
	0.0957316
	0.0922118
	0.0917473
	0.0924897
	0.090586
	0.0880652
	0.0884697
	0.0928726
	0.0929351
	0.0943121
	0.0967601
	0.0961667
	0.0924729
	0.09197
	0.0914918
	0.0939475
	0.0977813
	0.10217
	0.105779
	0.105307
	0.102084
	0.100852
	0.0990954
	0.0936409
	0.0937086
	0.0887088
	0.088198
	0.0938726
	0.0929903
	0.0904275
	0.0907344
	0.0894011
	0.0899732
	0.0925448
	0.0914703
	0.0912631
	0.0919184
	0.0974435
	0.0981024
	0.095111
	0.0914567
	0.0900518
	0.0919069
	0.0923658
	0.0945504
	0.0933621
	0.093888
	0.0894725
	0.0918736
	0.088859
	0.086447
	0.0888109
	0.0916092
	0.0897975
	0.0934755
	0.097722
	0.0940223
	0.0954703
	0.0966489
	0.100238
	0.0981064
	0.0983163
	0.0997664
	0.102684
	0.104984
	0.0999767
	0.0952837
	0.0977809
	0.0987074
	0.0995893
	0.094329
	0.0886476
	0.0876519
	0.0860577
	0.0837183
	0.0840769
	0.0931762
	0.0968651
	0.102859
	0.102391
	0.0958386
	0.0991059
	0.0985056
	0.104463
	0.100686
	0.0978317
	0.0981568
	0.0967172
	0.0970802
	0.100537
	0.0932079
	0.0843884
	0.0867877
	0.0902091
	0.0927725
	0.0934016
	0.0962237
	0.09628
	0.0952916
	0.0967892
	0.0935535
	0.095801
	0.0994204
	0.10385
	0.106966
	0.103455
	0.105751
	0.103438
	0.0949726
	0.0972453
	0.0986242
	0.103238
	0.10279
	0.106509
	0.108801
	0.104696
	0.106781
	0.107106
	0.105382
	0.100621
	0.100463
	0.104585
	0.102232
	0.105707
	0.101425
	0.0994697
	0.102802
	0.0989073
	0.0922507
	0.0949478
	0.0956774
	0.0971253
	0.0975915
	0.0935739
	0.0922009
	0.0916499
	0.0969471
	0.0943941
	0.0943563
	0.0950522
	0.0995055
	0.0982175
	0.102897
	0.105225
	0.10641
	0.110866
	0.112449
	0.102725
	0.105004
	0.102817
	0.101913
	0.0982929
	0.0930855
	0.0895432
	0.092107
	0.0979199
	0.0939463
	0.0941426
	0.0960929
	0.0961972
	0.0942593
	0.0916351
	0.0955015
	0.0978548
	0.10386
	0.0998903
	0.0998229
	0.0973557
	0.0941398
	0.0952626
	0.0943328
	0.0970938
	0.096833
	0.102315
	0.100957
	0.0960575
	0.0942416
	0.0916866
	0.0910674
	0.0991621
	0.094817
	0.0913543
	0.0949448
	0.0967753
	0.101314
	0.0991942
	0.0952987
	0.0951129
	0.0939421
	0.0948503
	0.0968716
	0.10078
	0.0990006
	0.0996515
	0.101049
	0.101593
	0.0968767
	0.0989015
	0.100955
	0.102035
	0.0986743
	0.101141
	0.0950527
	0.0926585
	0.0924186
	0.0958596
	0.0924037
	0.0910961
	0.0871018
	0.0890372
	0.0877625
	0.0910588
	0.0967224
	0.0938607
	0.0951203
	0.0952692
	0.0919447
	0.0909632
	0.0878777
	0.0884342
	0.089584
	0.0944326
	0.0959951
	0.0967707
	0.0974831
	0.102787
	0.101177
	0.102684
	0.0992598
	0.0983603
	0.0962899
	0.0964414
	0.0977409
	0.0980645
	0.0983571
	0.0985191
	0.0981206
	0.0960192
	0.0973032
	0.0961928
	0.0902719
	0.0929926
	0.0923502
	0.0939848
	0.0961531
	0.0967099
	0.0947567
	0.0988787
	0.102984
	0.101636
	0.0988811
	0.0974186
	0.0970235
	0.097877
	0.0988759
	0.100871
	0.0982499
	0.101248
	0.0971054
	0.0993468
	0.0983379
	0.101664
	0.0986436
	0.0964473
	0.0897048
	0.086305
	0.090572
	0.0893959
	0.0911892
	0.0950946
	0.0966124
	0.0963624
	0.0982357
	0.101983
	0.100478
	0.0956591
	0.0994503
	0.0981868
	0.0966876
	0.0945128
	0.0923354
	0.0905871
	0.0862542
	0.0879115
	0.0865646
	0.0919065
	0.093232
	0.0910446
	0.0869989
	0.0884164
	0.0925375
	0.0892693
	0.0936794
	0.0947449
	0.092555
	0.095427
	0.101993
	0.102662
	0.0975374
	0.0929827
	0.0922908
	0.0976623
	0.0967509
	0.0937976
	0.0952821
	0.0983191
	0.0976332
	0.0975199
	0.0975668
	0.0957634
	0.0918185
	0.0917379
	0.0948087
	0.092957
	0.0962676
	0.0968747
	0.0944027
	0.0989734
	0.0965872
	0.0950377
	0.0955402
	0.0936008
	0.0979783
	0.0986888
	0.0966596
	0.0972163
	0.0989267
	0.101611
	0.0973091
	0.101395
	0.10543
	0.106153
	0.105767
	0.0982637
	0.0979757
	0.100276
	0.101072
	0.0987479
	0.0990477
	0.0934081
	0.0925648
	0.0904011
	0.0946784
	0.0925281
	0.0891881
	0.086698
	0.0843486
	0.0879409
	0.0893528
	0.0847843
	0.0828005
	0.0869316
	0.091694
	0.0913495
	0.0957105
	0.0996224
	0.0977207
	0.0973415
	0.0958117
	0.0973184
	0.0911132
	0.0898683
	0.0935292
	0.0928702
	0.0966992
	0.0979228
	0.093461
	0.0902077
	0.0861129
	0.087192
	0.0878494
	0.0904923
	0.0954434
	0.0972773
	0.0978235
	0.0984656
	0.099431
	0.0910488
	0.0905323
	0.0910395
	0.0880725
	0.083086
	0.0857927
	0.0888995
	0.0849048
	0.0838554
	0.0879595
	0.0892846
	0.0902498
	0.0957121
	0.0951249
	0.094819
	0.0875504
	0.0860536
	0.0864439
	0.0797698
	0.07982
	0.0809554
	0.0807471
	0.082748
	0.0841402
	0.0888253
	0.0872166
	0.0833413
	0.0865541
	0.0864526
	0.0833673
	0.0814751
	0.0872471
	0.0893691
	0.0915088
	0.09341
	0.0913736
	0.090485
	0.0915579
	0.0966812
	0.0994285
	0.102847
	0.0979914
	0.0992117
	0.0964764
	0.0970042
	0.0931913
	0.094414
	0.0913151
	0.0928818
	0.0919338
	0.0936549
	0.0983475
	0.0990254
	0.103336
	0.107739
	0.100519
	0.101813
	0.0968094
	0.101295
	0.100067
	0.104495
	0.104037
	0.105994
	0.0988789
	0.0991907
	0.0984796
	0.102871
	0.104019
	0.0972558
	0.0971684
	0.101898
	0.100706
	0.0995709
	0.0989328
	0.0990685
	0.0992463
	0.0948421
	0.0935958
	0.0912701
	0.0932613
	0.0931416
	0.0926867
	0.0998077
	0.100189
	0.0990343
	0.0976599
	0.0995154
	0.100974
	0.100096
	0.0988155
	0.0990175
	0.100489
	0.0952515
	0.0943158
	0.0892795
	0.0846735
	0.0845074
	0.0873705
	0.0864369
	0.078942
	0.0799774
	0.0836477
	0.0886696
	0.0886271
	0.0891328
	0.0921894
	0.0901291
	0.091068
	0.0921954
	0.0955458
	0.0964636
	0.0988974
	0.0930948
	0.09279
	0.0972734
	0.0931926
	0.0934528
	0.105001
	0.110554
	0.111665
	0.108969
	0.105567
	0.100584
	0.103095
	0.107874
	0.104387
	0.102097
	0.0971669
	0.0919349
	0.093955
	0.089633
	0.0893244
	0.088709
	0.0865485
	0.0853415
	0.0898152
	0.0847188
	0.0915215
	0.0882338
	0.0853577
	0.0867037
	0.0898351
	0.0873323
	0.0853311
	0.0845231
	0.0819633
	0.081824
	0.0842282
	0.0859061
	0.0874593
	0.0905733
	0.0879753
	0.0872478
	0.0869355
	0.0915554
	0.0839295
	0.0892756
	0.0889283
	0.0890925
	0.0920542
	0.0906062
	0.0872793
	0.0891645
	0.0884001
	0.0899567
	0.0884242
	0.096444
	0.100401
	0.102453
	0.099924
	0.0987647
	0.102324
	0.103869
	0.106246
	0.104738
	0.106575
	0.101017
	0.0977537
	0.0949727
	0.0940033
	0.096787
	0.0993359
	0.0986609
	0.101044
	0.0989055
	0.096161
	0.0975421
	0.0991745
	0.098119
	0.0983737
	0.0979979
	0.102003
	0.101396
	0.0975333
	0.092137
	0.089706
	0.0911649
	0.091227
	0.0998958
	0.100679
	0.0997045
	0.0965976
	0.0942773
	0.0914528
	0.0938929
	0.0957695
	0.100631
	0.104545
	0.106424
	0.100249
	0.0975164
	0.0964909
	0.0953198
	0.0945287
	0.0981495
	0.0965447
	0.0978513
	0.0969056
	0.0904741
	0.0913046
	0.0920502
	0.0882321
	0.0976839
	0.100011
	0.100119
	0.0983837
	0.0981116
	0.0973947
	0.0976617
	0.0975395
	0.0997335
	0.0972351
	0.0986929
	0.100133
	0.0991531
	0.100804
	0.100957
	0.0935218
	0.0956751
	0.0932549
	0.0864544
	0.0890429
	0.0867168
	0.0870381
	0.0874052
	0.0886503
	0.0860757
	0.0886521
	0.0874227
	0.0875305
	0.0894202
	0.0921321
	0.0915901
	0.0944566
	0.0979966
	0.0998089
	0.0959425
	0.097349
	0.0951339
	0.0960286
	0.0929027
	0.0926363
	0.0908769
	0.096856
	0.100139
	0.098394
	0.0997896
	0.101664
	0.102711
	0.0998689
	0.0940232
	0.0923819
	0.0972111
	0.0948776
	0.0979023
	0.0973741
	0.0988324
	0.0927732
	0.0884722
	0.0867976
	0.0881467
	0.0908914
	0.0922605
	0.0906038
	0.090075
	0.0948122
	0.0996596
	0.0976812
	0.100065
	0.0991116
	0.100495
	0.0981157
	0.0944104
	0.0977068
	0.0958944
	0.0950603
	0.0937292
	0.0914368
	0.0873882
	0.0874011
	0.0877396
	0.0896822
	0.0890285
	0.0916613
	0.0876709
	0.0906767
	0.0924961
	0.0942454
	0.0972971
	0.0992142
	0.0980343
	0.100406
	0.0939719
	0.0908076
	0.088196
	0.0859332
	0.0851491
	0.0881863
	0.0875943
	0.0895043
	0.0919239
	0.0915176
	0.0878953
	0.0890393
	0.0882704
	0.0881255
	0.0903994
	0.0874213
	0.0900742
	0.0909196
	0.0921144
	0.0873586
	0.0900014
	0.0922407
	0.0902603
	0.0917451
	0.0907811
	0.0918175
	0.0866641
	0.0842809
	0.0870878
	0.0915259
	0.0929363
	0.0909189
	0.0911977
	0.0909248
	0.0901014
	0.0896248
	0.0931836
	0.0960187
	0.096696
	0.10198
	0.102951
	0.10272
	0.10384
	0.104538
	0.104477
	0.101124
	0.0960404
	0.095051
	0.0953122
	0.0922706
	0.0909125
	0.0864249
	0.094283
	0.0936515
	0.0963192
	0.0932559
	0.0895668
	0.0889186
	0.0850285
	0.0856938
	0.0876939
	0.0863308
	0.0867564
	0.0889446
	0.0921949
	0.0961887
	0.0929594
	0.0918278
	0.0888615
	0.0909788
	0.0876213
	0.0855211
	0.0850002
	0.089684
	0.0910561
	0.0938217
	0.0914838
	0.0919154
	0.0918634
	0.0888429
	0.0903971
	0.0902356
	0.0894841
	0.0894669
	0.0897998
	0.0936073
	0.0937855
	0.0959328
	0.0991039
	0.0996324
	0.0985172
	0.0920449
	0.0974157
	0.0967054
	0.100255
	0.0987345
	0.0991507
	0.09784
	0.0951368
	0.0939302
	0.095242
	0.0993069
	0.103001
	0.102929
	0.100511
	0.0972765
	0.0937387
	0.0927718
	0.0948852
	0.0897991
	0.0953672
	0.0926906
	0.0900068
	0.0919239
	0.096883
	0.0989743
	0.103512
	0.0977662
	0.0950806
	0.0917416
	0.0980366
	0.0993905
	0.0975474
	0.100613
	0.0938014
	0.0895276
	0.0916513
	0.0910657
	0.0916254
	0.098307
	0.100435
	0.104487
	0.0997298
	0.0979733
	0.0935127
	0.0939485
	0.0941205
	0.0940253
	0.0924109
	0.0926196
	0.0924017
[truncated: 7 more rows]

## Sheet: One sim - Time(s) - Fil density
0	0
0.0498418	0.0498418
0.0996835	0.0996835
0.149525	0.149525
0.199367	0.199367
0.249209	0.249209
0.299051	0.299051
0.348892	0.348892
0.398734	0.398734
0.448576	0.448576
0.498418	0.498418
0.548259	0.548259
0.598101	0.598101
0.647943	0.647943
0.697785	0.697785
0.747627	0.747627
0.797468	0.797468
0.84731	0.84731
0.897152	0.897152
0.946994	0.946994
0.996835	0.996835
1.04668	1.04668
1.09652	1.09652
1.14636	1.14636
1.1962	1.1962
1.24604	1.24604
1.29589	1.29589
1.34573	1.34573
1.39557	1.39557
1.44541	1.44541
1.49525	1.49525
1.54509	1.54509
1.59494	1.59494
1.64478	1.64478
1.69462	1.69462
1.74446	1.74446
1.7943	1.7943
1.84415	1.84415
1.89399	1.89399
1.94383	1.94383
1.99367	1.99367
2.04351	2.04351
2.09335	2.09335
2.1432	2.1432
2.19304	2.19304
2.24288	2.24288
2.29272	2.29272
2.34256	2.34256
2.39241	2.39241
2.44225	2.44225
2.49209	2.49209
2.54193	2.54193
2.59177	2.59177
2.64161	2.64161
2.69146	2.69146
2.7413	2.7413
2.79114	2.79114
2.84098	2.84098
2.89082	2.89082
2.94066	2.94066
2.99051	2.99051
3.04035	3.04035
3.09019	3.09019
3.14003	3.14003
3.18987	3.18987
3.23972	3.23972
3.28956	3.28956
3.3394	3.3394
3.38924	3.38924
3.43908	3.43908
3.48892	3.48892
3.53877	3.53877
3.58861	3.58861
3.63845	3.63845
3.68829	3.68829
3.73813	3.73813
3.78797	3.78797
3.83782	3.83782
3.88766	3.88766
3.9375	3.9375
3.98734	3.98734
4.03718	4.03718
4.08703	4.08703
4.13687	4.13687
4.18671	4.18671
4.23655	4.23655
4.28639	4.28639
4.33623	4.33623
4.38608	4.38608
4.43592	4.43592
4.48576	4.48576
4.5356	4.5356
4.58544	4.58544
4.63528	4.63528
4.68513	4.68513
4.73497	4.73497
4.78481	4.78481
4.83465	4.83465
4.88449	4.88449
4.93434	4.93434
4.98418	4.98418
5.03402	5.03402
5.08386	5.08386
5.1337	5.1337
5.18354	5.18354
5.23339	5.23339
5.28323	5.28323
5.33307	5.33307
5.38291	5.38291
5.43275	5.43275
5.48259	5.48259
5.53244	5.53244
5.58228	5.58228
5.63212	5.63212
5.68196	5.68196
5.7318	5.7318
5.78165	5.78165
5.83149	5.83149
5.88133	5.88133
5.93117	5.93117
5.98101	5.98101
6.03085	6.03085
6.0807	6.0807
6.13054	6.13054
6.18038	6.18038
6.23022	6.23022
6.28006	6.28006
6.3299	6.3299
6.37975	6.37975
6.42959	6.42959
6.47943	6.47943
6.52927	6.52927
6.57911	6.57911
6.62896	6.62896
6.6788	6.6788
6.72864	6.72864
6.77848	6.77848
6.82832	6.82832
6.87816	6.87816
6.92801	6.92801
6.97785	6.97785
7.02769	7.02769
7.07753	7.07753
7.12737	7.12737
7.17722	7.17722
7.22706	7.22706
7.2769	7.2769
7.32674	7.32674
7.37658	7.37658
7.42642	7.42642
7.47627	7.47627
7.52611	7.52611
7.57595	7.57595
7.62579	7.62579
7.67563	7.67563
7.72547	7.72547
7.77532	7.77532
7.82516	7.82516
7.875	7.875
7.92484	7.92484
7.97468	7.97468
8.02453	8.02453
8.07437	8.07437
8.12421	8.12421
8.17405	8.17405
8.22389	8.22389
8.27373	8.27373
8.32358	8.32358
8.37342	8.37342
8.42326	8.42326
8.4731	8.4731
8.52294	8.52294
8.57278	8.57278
8.62263	8.62263
8.67247	8.67247
8.72231	8.72231
8.77215	8.77215
8.82199	8.82199
8.87184	8.87184
8.92168	8.92168
8.97152	8.97152
9.02136	9.02136
9.0712	9.0712
9.12104	9.12104
9.17089	9.17089
9.22073	9.22073
9.27057	9.27057
9.32041	9.32041
9.37025	9.37025
9.42009	9.42009
9.46994	9.46994
9.51978	9.51978
9.56962	9.56962
9.61946	9.61946
9.6693	9.6693
9.71915	9.71915
9.76899	9.76899
9.81883	9.81883
9.86867	9.86867
9.91851	9.91851
9.96835	9.96835
10.0182	10.0182
10.068	10.068
10.1179	10.1179
10.1677	10.1677
10.2176	10.2176
10.2674	10.2674
10.3172	10.3172
10.3671	10.3671
10.4169	10.4169
10.4668	10.4668
10.5166	10.5166
10.5665	10.5665
10.6163	10.6163
10.6661	10.6661
10.716	10.716
10.7658	10.7658
10.8157	10.8157
10.8655	10.8655
10.9153	10.9153
10.9652	10.9652
11.015	11.015
11.0649	11.0649
11.1147	11.1147
11.1646	11.1646
11.2144	11.2144
	11.2642
	11.3141
	11.3639
	11.4138
	11.4636
	11.5134
	11.5633
	11.6131
	11.663
	11.7128
	11.7627
	11.8125
	11.8623
	11.9122
	11.962
	12.0119
	12.0617
	12.1116
	12.1614
	12.2112
	12.2611
	12.3109
	12.3608
	12.4106
	12.4604
	12.5103
	12.5601
	12.61
	12.6598
	12.7097
	12.7595
	12.8093
	12.8592
	12.909
	12.9589
	13.0087
	13.0585
	13.1084
	13.1582
	13.2081
	13.2579
	13.3078
	13.3576
	13.4074
	13.4573
	13.5071
	13.557
	13.6068
	13.6566
	13.7065
	13.7563
	13.8062
	13.856
	13.9059
	13.9557
	14.0055
	14.0554
	14.1052
	14.1551
	14.2049
	14.2547
	14.3046
	14.3544
	14.4043
	14.4541
	14.504
	14.5538
	14.6036
	14.6535
	14.7033
	14.7532
	14.803
	14.8528
	14.9027
	14.9525
	15.0024
	15.0522
	15.1021
	15.1519
	15.2017
	15.2516
	15.3014
	15.3513
	15.4011
	15.4509
	15.5008
	15.5506
	15.6005
	15.6503
	15.7002
	15.75
	15.7998
	15.8497
	15.8995
	15.9494
	15.9992
	16.0491
	16.0989
	16.1487
	16.1986
	16.2484
	16.2983
	16.3481
	16.3979
	16.4478
	16.4976
	16.5475
	16.5973
	16.6472
	16.697
	16.7468
	16.7967
	16.8465
	16.8964
	16.9462
	16.996
	17.0459
	17.0957
	17.1456
	17.1954
	17.2453
	17.2951
	17.3449
	17.3948
	17.4446
	17.4945
	17.5443
	17.5941
	17.644
	17.6938
	17.7437
	17.7935
	17.8434
	17.8932
	17.943
	17.9929
	18.0427
	18.0926
	18.1424
	18.1922
	18.2421
	18.2919
	18.3418
	18.3916
	18.4415
	18.4913
	18.5411
	18.591
	18.6408
	18.6907
	18.7405
	18.7903
	18.8402
	18.89
	18.9399
	18.9897
	19.0396
	19.0894
	19.1392
	19.1891
	19.2389
	19.2888
	19.3386
	19.3884
	19.4383
	19.4881
	19.538
	19.5878
	19.6377
	19.6875
	19.7373
	19.7872
	19.837
	19.8869
	19.9367
	19.9866
	20.0364
	20.0862
	20.1361
	20.1859
	20.2358
	20.2856
	20.3354
	20.3853
	20.4351
	20.485
	20.5348
	20.5847
	20.6345
	20.6843
	20.7342
	20.784
	20.8339
	20.8837
	20.9335
	20.9834
	21.0332
	21.0831
	21.1329
	21.1828
	21.2326
	21.2824
	21.3323
	21.3821
	21.432
	21.4818
	21.5316
	21.5815
	21.6313
	21.6812
	21.731
	21.7809
	21.8307
	21.8805
	21.9304
	21.9802
	22.0301
	22.0799
	22.1297
	22.1796
	22.2294
	22.2793
	22.3291
	22.379
	22.4288
	22.4786
	22.5285
	22.5783
	22.6282
	22.678
	22.7278
	22.7777
	22.8275
	22.8774
	22.9272
	22.9771
	23.0269
	23.0767
	23.1266
	23.1764
	23.2263
	23.2761
	23.3259
	23.3758
	23.4256
	23.4755
	23.5253
	23.5752
	23.625
	23.6748
	23.7247
	23.7745
	23.8244
	23.8742
	23.9241
	23.9739
	24.0237
	24.0736
	24.1234
	24.1733
	24.2231
	24.2729
	24.3228
	24.3726
	24.4225
	24.4723
	24.5222
	24.572
	24.6218
	24.6717
	24.7215
	24.7714
	24.8212
	24.871
	24.9209
	24.9707
	25.0206
	25.0704
	25.1203
	25.1701
	25.2199
	25.2698
	25.3196
	25.3695
	25.4193
	25.4691
	25.519
	25.5688
	25.6187
	25.6685
	25.7184
	25.7682
	25.818
	25.8679
	25.9177
	25.9676
	26.0174
	26.0672
	26.1171
	26.1669
	26.2168
	26.2666
	26.3165
	26.3663
	26.4161
	26.466
	26.5158
	26.5657
	26.6155
	26.6653
	26.7152
	26.765
	26.8149
	26.8647
	26.9146
	26.9644
	27.0142
	27.0641
	27.1139
	27.1638
	27.2136
	27.2634
	27.3133
	27.3631
	27.413
	27.4628
	27.5127
	27.5625
	27.6123
	27.6622
	27.712
	27.7619
	27.8117
	27.8616
	27.9114
	27.9612
	28.0111
	28.0609
	28.1108
	28.1606
	28.2104
	28.2603
	28.3101
	28.36
	28.4098
	28.4597
	28.5095
	28.5593
	28.6092
	28.659
	28.7089
	28.7587
	28.8085
	28.8584
	28.9082
	28.9581
	29.0079
	29.0578
	29.1076
	29.1574
	29.2073
	29.2571
	29.307
	29.3568
	29.4066
	29.4565
	29.5063
	29.5562
	29.606
	29.6559
	29.7057
	29.7555
	29.8054
	29.8552
	29.9051
	29.9549
	30.0047
	30.0546
	30.1044
	30.1543
	30.2041
	30.254
	30.3038
	30.3536
	30.4035
	30.4533
	30.5032
	30.553
	30.6028
	30.6527
	30.7025
	30.7524
	30.8022
	30.8521
	30.9019
	30.9517
	31.0016
	31.0514
	31.1013
	31.1511
	31.2009
	31.2508
	31.3006
	31.3505
	31.4003
	31.4502
	31.5
	31.5498
	31.5997
	31.6495
	31.6994
	31.7492
	31.7991
	31.8489
	31.8987
	31.9486
	31.9984
	32.0483
	32.0981
	32.1479
	32.1978
	32.2476
	32.2975
	32.3473
	32.3972
	32.447
	32.4968
	32.5467
	32.5965
	32.6464
	32.6962
	32.746
	32.7959
	32.8457
	32.8956
	32.9454
	32.9953
	33.0451
	33.0949
	33.1448
	33.1946
	33.2445
	33.2943
	33.3441
	33.394
	33.4438
	33.4937
	33.5435
	33.5934
	33.6432
	33.693
	33.7429
	33.7927
	33.8426
	33.8924
	33.9422
	33.9921
	34.0419
	34.0918
	34.1416
	34.1915
	34.2413
	34.2911
	34.341
	34.3908
	34.4407
	34.4905
	34.5403
	34.5902
	34.64
	34.6899
	34.7397
	34.7896
	34.8394
	34.8892
	34.9391
	34.9889
	35.0388
	35.0886
	35.1384
	35.1883
	35.2381
	35.288
	35.3378
	35.3877
	35.4375
	35.4873
	35.5372
	35.587
	35.6369
	35.6867
	35.7365
	35.7864
	35.8362
	35.8861
	35.9359
	35.9858
	36.0356
	36.0854
	36.1353
	36.1851
	36.235
	36.2848
	36.3347
	36.3845
	36.4343
	36.4842
	36.534
	36.5839
	36.6337
	36.6835
	36.7334
	36.7832
	36.8331
	36.8829
	36.9328
	36.9826
	37.0324
	37.0823
	37.1321
	37.182
	37.2318
	37.2816
	37.3315
	37.3813
	37.4312
	37.481
	37.5309
	37.5807
	37.6305
	37.6804
	37.7302
	37.7801
	37.8299
	37.8797
	37.9296
	37.9794
	38.0293
	38.0791
	38.129
	38.1788
	38.2286
	38.2785
	38.3283
	38.3782
	38.428
	38.4778
	38.5277
	38.5775
	38.6274
	38.6772
	38.7271
	38.7769
	38.8267
	38.8766
	38.9264
	38.9763
	39.0261
	39.0759
	39.1258
	39.1756
	39.2255
	39.2753
	39.3252
	39.375
	39.4248
	39.4747
	39.5245
	39.5744
	39.6242
	39.674
	39.7239
	39.7737
	39.8236
	39.8734
	39.9233
	39.9731
	40.0229
	40.0728
	40.1226
	40.1725
	40.2223
	40.2722
	40.322
	40.3718
	40.4217
	40.4715
	40.5214
	40.5712
	40.621
	40.6709
	40.7207
	40.7706
	40.8204
	40.8703
	40.9201
	40.9699
	41.0198
	41.0696
	41.1195
	41.1693
	41.2191
	41.269
	41.3188
	41.3687
	41.4185
	41.4684
	41.5182
	41.568
	41.6179
	41.6677
	41.7176
	41.7674
	41.8172
	41.8671
	41.9169
	41.9668
	42.0166
	42.0665
	42.1163
	42.1661
	42.216
	42.2658
	42.3157
	42.3655
	42.4153
	42.4652
	42.515
	42.5649
	42.6147
	42.6646
	42.7144
	42.7642
	42.8141
	42.8639
	42.9138
	42.9636
	43.0134
	43.0633
	43.1131
	43.163
	43.2128
	43.2627
	43.3125
	43.3623
	43.4122
	43.462
	43.5119
	43.5617
	43.6115
	43.6614
	43.7112
	43.7611
	43.8109
	43.8608
	43.9106
	43.9604
	44.0103
	44.0601
	44.11
	44.1598
	44.2097
	44.2595
	44.3093
	44.3592
	44.409
	44.4589
	44.5087
	44.5585
	44.6084
	44.6582
	44.7081
	44.7579
	44.8078
	44.8576
	44.9074
	44.9573
	45.0071
	45.057
	45.1068
	45.1566
	45.2065
	45.2563
	45.3062
	45.356
	45.4059
	45.4557
	45.5055
	45.5554
	45.6052
	45.6551
	45.7049
	45.7547
	45.8046
	45.8544
	45.9043
	45.9541
	46.004
	46.0538
	46.1036
	46.1535
	46.2033
	46.2532
	46.303
	46.3528
	46.4027
	46.4525
	46.5024
	46.5522
	46.6021
	46.6519
	46.7017
	46.7516
	46.8014
	46.8513
	46.9011
	46.9509
	47.0008
	47.0506
	47.1005
	47.1503
	47.2002
	47.25
	47.2998
	47.3497
	47.3995
	47.4494
	47.4992
	47.549
	47.5989
	47.6487
	47.6986
	47.7484
	47.7983
	47.8481
	47.8979
	47.9478
	47.9976
	48.0475
	48.0973
	48.1472
	48.197
	48.2468
	48.2967
	48.3465
	48.3964
	48.4462
	48.496
	48.5459
	48.5957
	48.6456
	48.6954
	48.7453
	48.7951
	48.8449
	48.8948
	48.9446
	48.9945
	49.0443
	49.0941
	49.144
	49.1938
	49.2437
	49.2935
	49.3434
	49.3932
	49.443
	49.4929
	49.5427
	49.5926
	49.6424
	49.6922
	49.7421
	49.7919
	49.8418
	49.8916
	49.9415
	49.9913
	50.0411
	50.091
	50.1408
	50.1907
	50.2405
	50.2903
	50.3402
	50.39
	50.4399
	50.4897
	50.5396
	50.5894
	50.6392
	50.6891
	50.7389
	50.7888
	50.8386
	50.8884
	50.9383
	50.9881
	51.038
	51.0878
	51.1377
	51.1875
	51.2373
	51.2872
	51.337
	51.3869
	51.4367
	51.4865
	51.5364
	51.5862
	51.6361
	51.6859
	51.7358
	51.7856
	51.8354
	51.8853
	51.9351
	51.985
	52.0348
	52.0847
	52.1345
	52.1843
	52.2342
	52.284
	52.3339
	52.3837
	52.4335
	52.4834
	52.5332
	52.5831
	52.6329
	52.6828
	52.7326
	52.7824
	52.8323
	52.8821
	52.932
	52.9818
	53.0316
	53.0815
	53.1313
	53.1812
	53.231
	53.2809
	53.3307
	53.3805
	53.4304
	53.4802
	53.5301
	53.5799
	53.6297
	53.6796
	53.7294
	53.7793
	53.8291
	53.879
	53.9288
	53.9786
	54.0285
	54.0783
	54.1282
	54.178
	54.2278
	54.2777
	54.3275
	54.3774
	54.4272
	54.4771
	54.5269
	54.5767
	54.6266
	54.6764
	54.7263
	54.7761
	54.8259
	54.8758
	54.9256
	54.9755
	55.0253
	55.0752
	55.125
	55.1748
	55.2247
	55.2745
	55.3244
	55.3742
	55.424
	55.4739
	55.5237
	55.5736
	55.6234
	55.6733
	55.7231
	55.7729
	55.8228
	55.8726
	55.9225
	55.9723
	56.0222
	56.072
	56.1218
	56.1717
	56.2215
	56.2714
	56.3212
	56.371
	56.4209
	56.4707
	56.5206
	56.5704
	56.6203
	56.6701
	56.7199
	56.7698
	56.8196
	56.8695
	56.9193
	56.9691
	57.019
	57.0688
	57.1187
	57.1685
	57.2184
	57.2682
	57.318
	57.3679
	57.4177
	57.4676
	57.5174
	57.5672
	57.6171
	57.6669
	57.7168
	57.7666
	57.8165
	57.8663
	57.9161
	57.966
	58.0158
	58.0657
	58.1155
	58.1653
	58.2152
	58.265
	58.3149
	58.3647
	58.4146
	58.4644
	58.5142
	58.5641
	58.6139
	58.6638
	58.7136
	58.7634
	58.8133
	58.8631
	58.913
	58.9628
	59.0127
	59.0625
	59.1123
	59.1622
	59.212
	59.2619
	59.3117
	59.3615
	59.4114
	59.4612
	59.5111
	59.5609
	59.6108
	59.6606
	59.7104
	59.7603
	59.8101
	59.86
	59.9098
	59.9597
	60.0095
	60.0593
	60.1092
	60.159
	60.2089
	60.2587
	60.3085
	60.3584
	60.4082
	60.4581
	60.5079
	60.5578
	60.6076
	60.6574
	60.7073
	60.7571
	60.807
	60.8568
	60.9066
	60.9565
	61.0063
	61.0562
	61.106
	61.1559
	61.2057
	61.2555
	61.3054
	61.3552
	61.4051
	61.4549
	61.5047
	61.5546
	61.6044
	61.6543
	61.7041
	61.754
	61.8038
	61.8536
	61.9035
	61.9533
	62.0032
	62.053
	62.1028
	62.1527
	62.2025
	62.2524
	62.3022
	62.3521
	62.4019
	62.4517
	62.5016
	62.5514
	62.6013
	62.6511
	62.7009
	62.7508
	62.8006
	62.8505
	62.9003
	62.9502
	63
	63.0498
	63.0997
	63.1495
	63.1994
	63.2492
	63.299
	63.3489
	63.3987
	63.4486
	63.4984
	63.5483
	63.5981
	63.6479
	63.6978
	63.7476
	63.7975
	63.8473
	63.8972
	63.947
	63.9968
	64.0467
	64.0965
	64.1464
	64.1962
	64.246
	64.2959
	64.3457
	64.3956
	64.4454
	64.4953
	64.5451
	64.5949
	64.6448
	64.6946
	64.7445
	64.7943
	64.8441
	64.894
	64.9438
	64.9937
	65.0435
	65.0934
	65.1432
	65.193
	65.2429
	65.2927
	65.3426
	65.3924
	65.4422
	65.4921
	65.5419
	65.5918
	65.6416
	65.6915
	65.7413
	65.7911
	65.841
	65.8908
	65.9407
	65.9905
	66.0403
	66.0902
	66.14
	66.1899
	66.2397
	66.2896
	66.3394
	66.3892
	66.4391
	66.4889
	66.5388
	66.5886
	66.6384
	66.6883
	66.7381
	66.788
	66.8378
	66.8877
	66.9375
	66.9873
	67.0372
	67.087
	67.1369
	67.1867
	67.2365
	67.2864
	67.3362
	67.3861
	67.4359
	67.4858
	67.5356
	67.5854
	67.6353
	67.6851
	67.735
	67.7848
	67.8347
	67.8845
	67.9343
	67.9842
	68.034
	68.0839
	68.1337
	68.1835
	68.2334
	68.2832
	68.3331
	68.3829
	68.4328
	68.4826
	68.5324
	68.5823
	68.6321
	68.682
	68.7318
	68.7816
	68.8315
	68.8813
	68.9312
	68.981
	69.0309
	69.0807
	69.1305
	69.1804
	69.2302
	69.2801
	69.3299
	69.3797
	69.4296
	69.4794
	69.5293
	69.5791
	69.629
	69.6788
	69.7286
	69.7785
	69.8283
	69.8782
	69.928
	69.9778
	70.0277
	70.0775
	70.1274
	70.1772
	70.2271
	70.2769
	70.3267
	70.3766
	70.4264
	70.4763
	70.5261
	70.5759
	70.6258
	70.6756
	70.7255
	70.7753
	70.8252
	70.875
	70.9248
	70.9747
	71.0245
	71.0744
	71.1242
	71.174
	71.2239
	71.2737
	71.3236
	71.3734
	71.4233
	71.4731
	71.5229
	71.5728
	71.6226
	71.6725
	71.7223
	71.7722
	71.822
	71.8718
	71.9217
	71.9715
	72.0214
	72.0712
	72.121
	72.1709
	72.2207
	72.2706
	72.3204
	72.3703
	72.4201
	72.4699
	72.5198
	72.5696
	72.6195
	72.6693
	72.7191
	72.769
	72.8188
	72.8687
	72.9185
	72.9684
	73.0182
	73.068
	73.1179
	73.1677
	73.2176
	73.2674
	73.3172
	73.3671
	73.4169
	73.4668
	73.5166
	73.5665
	73.6163
	73.6661
	73.716
	73.7658
	73.8157
	73.8655
	73.9153
	73.9652
	74.015
	74.0649
	74.1147
	74.1646
	74.2144
	74.2642
	74.3141
	74.3639
	74.4138
	74.4636
	74.5134
	74.5633
	74.6131
	74.663
	74.7128
	74.7627
	74.8125
	74.8623
	74.9122
	74.962
	75.0119
	75.0617
	75.1115
	75.1614
	75.2112
	75.2611
	75.3109
	75.3608
	75.4106
	75.4604
	75.5103
	75.5601
	75.61
	75.6598
	75.7097
	75.7595
	75.8093
	75.8592
	75.909
	75.9589
	76.0087
	76.0585
	76.1084
	76.1582
	76.2081
	76.2579
	76.3078
	76.3576
	76.4074
	76.4573
	76.5071
	76.557
	76.6068
	76.6566
	76.7065
	76.7563
	76.8062
	76.856
	76.9059
	76.9557
	77.0055
	77.0554
	77.1052
	77.1551
	77.2049
	77.2547
	77.3046
	77.3544
	77.4043
	77.4541
	77.504
	77.5538
	77.6036
	77.6535
	77.7033
	77.7532
	77.803
	77.8528
	77.9027
	77.9525
	78.0024
	78.0522
	78.1021
	78.1519
	78.2017
	78.2516
	78.3014
	78.3513
	78.4011
	78.4509
	78.5008
	78.5506
	78.6005
	78.6503
	78.7002
	78.75
	78.7998
	78.8497
	78.8995
	78.9494
	78.9992
	79.049
	79.0989
	79.1487
	79.1986
	79.2484
	79.2983
	79.3481
	79.3979
	79.4478
	79.4976
	79.5475
	79.5973
	79.6472
	79.697
	79.7468
	79.7967
	79.8465
	79.8964
	79.9462
	79.996
	80.0459
	80.0957
	80.1456
	80.1954
	80.2453
	80.2951
	80.3449
	80.3948
	80.4446
	80.4945
	80.5443
	80.5941
	80.644
	80.6938
	80.7437
	80.7935
	80.8434
	80.8932
	80.943
	80.9929
	81.0427
	81.0926
	81.1424
	81.1922
	81.2421
	81.2919
	81.3418
	81.3916
	81.4415
	81.4913
	81.5411
	81.591
	81.6408
	81.6907
	81.7405
	81.7903
	81.8402
	81.89
	81.9399
	81.9897
	82.0396
	82.0894
	82.1392
	82.1891
	82.2389
	82.2888
	82.3386
	82.3884
	82.4383
	82.4881
	82.538
	82.5878
	82.6377
	82.6875
	82.7373
	82.7872
	82.837
	82.8869
	82.9367
	82.9865
	83.0364
	83.0862
	83.1361
	83.1859
	83.2358
	83.2856
	83.3354
	83.3853
	83.4351
	83.485
	83.5348
	83.5847
	83.6345
	83.6843
	83.7342
	83.784
	83.8339
	83.8837
	83.9335
	83.9834
	84.0332
	84.0831
	84.1329
	84.1828
	84.2326
	84.2824
	84.3323
	84.3821
	84.432
	84.4818
	84.5316
	84.5815
	84.6313
	84.6812
	84.731
	84.7809
	84.8307
	84.8805
	84.9304
	84.9802
	85.0301
	85.0799
	85.1297
	85.1796
	85.2294
	85.2793
	85.3291
	85.379
	85.4288
	85.4786
	85.5285
	85.5783
	85.6282
	85.678
	85.7278
	85.7777
	85.8275
	85.8774
	85.9272
	85.9771
	86.0269
	86.0767
	86.1266
	86.1764
	86.2263
	86.2761
	86.3259
	86.3758
	86.4256
	86.4755
	86.5253
	86.5752
	86.625
	86.6748
	86.7247
	86.7745
	86.8244
	86.8742
	86.924
	86.9739
	87.0237
	87.0736
	87.1234
	87.1733
	87.2231
	87.2729
	87.3228
	87.3726
	87.4225
	87.4723
	87.5222
	87.572
	87.6218
	87.6717
	87.7215
	87.7714
	87.8212
	87.871
	87.9209
	87.9707
	88.0206
	88.0704
	88.1203
	88.1701
	88.2199
	88.2698
	88.3196
	88.3695
	88.4193
	88.4691
	88.519
	88.5688
	88.6187
	88.6685
	88.7184
	88.7682
	88.818
	88.8679
	88.9177
	88.9676
	89.0174
	89.0672
	89.1171
	89.1669
	89.2168
	89.2666
	89.3165
	89.3663
	89.4161
	89.466
	89.5158
	89.5657
	89.6155
	89.6653
	89.7152
	89.765
	89.8149
	89.8647
	89.9146
	89.9644
	90.0142
	90.0641
	90.1139
	90.1638
	90.2136
	90.2634
	90.3133
	90.3631
	90.413
	90.4628
	90.5127
	90.5625
	90.6123
	90.6622
	90.712
	90.7619
	90.8117
	90.8615
	90.9114
	90.9612
	91.0111
	91.0609
	91.1108
	91.1606
	91.2104
	91.2603
	91.3101
	91.36
	91.4098
	91.4597
	91.5095
	91.5593
	91.6092
	91.659
	91.7089
	91.7587
	91.8085
	91.8584
	91.9082
	91.9581
	92.0079
	92.0578
	92.1076
	92.1574
	92.2073
	92.2571
	92.307
	92.3568
	92.4066
	92.4565
	92.5063
	92.5562
	92.606
	92.6559
	92.7057
	92.7555
	92.8054
	92.8552
	92.9051
	92.9549
	93.0047
	93.0546
	93.1044
	93.1543
	93.2041
	93.254
	93.3038
	93.3536
	93.4035
	93.4533
	93.5032
	93.553
	93.6028
	93.6527
	93.7025
	93.7524
	93.8022
	93.8521
	93.9019
	93.9517
	94.0016
	94.0514
	94.1013
	94.1511
	94.2009
	94.2508
	94.3006
	94.3505
	94.4003
	94.4502
	94.5
	94.5498
	94.5997
	94.6495
	94.6994
	94.7492
	94.799
	94.8489
	94.8987
	94.9486
	94.9984
	95.0483
	95.0981
	95.1479
	95.1978
	95.2476
	95.2975
	95.3473
	95.3972
	95.447
	95.4968
	95.5467
	95.5965
	95.6464
	95.6962
	95.746
	95.7959
	95.8457
	95.8956
	95.9454
	95.9953
	96.0451
	96.0949
	96.1448
	96.1946
	96.2445
	96.2943
	96.3441
	96.394
	96.4438
	96.4937
	96.5435
	96.5934
	96.6432
	96.693
	96.7429
	96.7927
	96.8426
	96.8924
	96.9422
	96.9921
	97.0419
	97.0918
	97.1416
	97.1915
	97.2413
	97.2911
	97.341
	97.3908
	97.4407
	97.4905
	97.5403
	97.5902
	97.64
	97.6899
	97.7397
	97.7896
	97.8394
	97.8892
	97.9391
	97.9889
	98.0388
	98.0886
	98.1384
	98.1883
	98.2381
	98.288
	98.3378
	98.3877
	98.4375
	98.4873
	98.5372
	98.587
	98.6369
	98.6867
	98.7365
	98.7864
	98.8362
	98.8861
	98.9359
	98.9858
	99.0356
	99.0854
	99.1353
	99.1851
	99.235
	99.2848
	99.3347
	99.3845
	99.4343
	99.4842
	99.534
	99.5839
	99.6337
[truncated: 7 more rows]

## Sheet: One sim - Mean fil length
2.7	2.7
44.6502	44.9389
87.135	87.2414
120.655	122.201
140.159	143.329
142.908	142.151
140.086	134.915
132.837	133.67
130.73	131.612
131.731	134.938
136.454	136.783
136.962	141.595
139.617	140.651
142.927	139.682
145.686	141.821
143.509	145.863
141.968	146.664
143.658	148.813
142.823	145.183
140.361	142.557
140.978	143.993
143.372	141.358
142.396	142.783
142.4	144.788
141.985	144.796
141.552	144.059
139.807	143.219
141.963	143.831
141.25	145.495
140.263	149.251
142.257	149.301
141.09	149.129
143.679	143.914
143.567	139.885
143.869	136.391
143.013	136.867
143.738	138.915
143.396	144.021
143.723	144.661
143.496	145.017
139.945	145.919
141.521	145.248
143.654	143.054
147.084	140.2
146.476	139.505
146.051	141.212
144.543	140.577
143.656	139.057
146.526	138.364
144.662	140.349
144.485	138.31
144.173	137.839
146.461	141.157
144.889	142.287
142.249	141.166
143.071	146.757
141.738	145.807
140.877	144.686
138.514	144.314
143.601	142.329
144.659	139.299
147.509	137.383
143.795	137.077
144.771	139.259
143.395	140.725
142.055	140.937
143.113	140.187
145.402	141.592
141.076	142.834
139.364	139.77
142.424	139.464
147.477	141.431
146.34	143.866
144.78	146.836
143.268	144.477
143.272	141.45
145.97	141.407
144.606	143.643
145.57	142.058
145.241	142.115
144.061	144.02
143.732	145.409
141.217	145.001
	145.125
	146.335
	142.717
	143.178
	143.875
	142.311
	143.201
	142.109
	142.856
	144.444
	145.61
	144.691
	141.184
	143.638
	141.719
	140.171
	139.26
	140.388
	142.58
	143.787
	141.549
	140.858
	137.15
	137.074
	139.762
	143.002
	144.531
	142.693
	143.968
	145.242
	146.38
	143.881
	141.729
	142.915
	145.572
	145.793
	145.148
	144.894
	141.242
	147.35
	145.292
	144.968
	144.323
	141.836
	143.496
	146.192
	144.571
	143.203
	140.258
	137.177
	138.735
	142.274
	141.64
	138.752
	138.084
	140.986
	143.149
	144.291
	141.127
	141.147
	138.994
	138.381
	141.527
	141.46
	142.099
	141.732
	142.044
	139.07
	141.948
	141.324
	141.399
	140.361
	139.06
	138.845
	137.706
	135.918
	139.717
	144.675
	145.623
	145.717
	143.863
	145.605
	143.259
	139.808
	141.137
	141.556
	141.593
	143.006
	142.706
	143.114
	141.773
	144.351
	146.043
	144.925
	145.126
	144.217
	143.403
	140.636
	141.884
	141.256
	141.562
	142.699
	142.824
	142.7
	141.245
	143.815
	142.672
	142.751
	143.603
	142.736
	141.274
	140.928
	138.435
	140.314
	140.136
	143.64
	147.027
	147.314
	147.427
	143.728
	145.186
	141.046
	144.064
	142.188
	141.522
	140.275
	138.871
	142.67
	140.478
	139.935
	141.345
	142.431
	143.384
	146.682
	145.858
	143.901
	144.94
	142.671
	140.939
	143.746
	143.682
	141.322
	139.966
	142.173
	140.46
	138.312
	138.633
	138.365
	141.532
	143.532
	146.296
	144.432
	143.345
	140.023
	146.061
	143.935
	142.292
	139.805
	141.975
	143.57
	142.197
	142.695
	144.07
	147.974
	145.647
	144.037
	142.664
	144.531
	142.583
	141.661
	140.703
	141.68
	143.099
	145.526
	142.89
	146.498
	146.054
	145.09
	143.501
	141.672
	138.131
	142.207
	143.307
	144.403
	144.42
	142.036
	135.97
	136.983
	137.535
	139.513
	141.59
	142.946
	143.8
	142.461
	139.019
	139.52
	140.988
	138.884
	138.74
	140.031
	140.563
	143.562
	146.763
	142.313
	139.616
	143.179
	142.146
	141.012
	141.238
	141.894
	143.787
	143.309
	141.084
	139.389
	138.801
	139.121
	138.328
	137.451
	139.866
	143.926
	143.829
	139.379
	139.249
	138.681
	142.068
	140.318
	141.631
	142.953
	143.279
	141.765
	142.093
	141.686
	142.716
	145.441
	144.427
	143.145
	143.743
	143.641
	145.737
	146.457
	146.397
	146.744
	146.48
	146.411
	146.2
	144.908
	142.614
	141.96
	143.29
	145.804
	150.329
	149.518
	144.204
	143.125
	147.026
	149.394
	146.788
	144.623
	141.516
	141.94
	142.109
	143.631
	145.111
	145.081
	144.384
	144.91
	143.945
	143.67
	144.691
	145.231
	146.799
	145.29
	143.046
	140.424
	139.357
	143.322
	146.597
	147.481
	148.255
	147.321
	142.149
	139.15
	137.893
	140.406
	143.344
	143.066
	145.176
	143.566
	141.104
	142.22
	140.684
	143.536
	144.248
	147.226
	145.393
	144.74
	143.093
	140.591
	139.953
	145.632
	146.137
	148.61
	147.249
	146.022
	142.987
	142.691
	144.698
	146.92
	146.478
	145.034
	144.061
	145.69
	144.899
	143.896
	140.804
	142.569
	142.113
	139.754
	141.047
	140.255
	140.469
	140.98
	141.799
	141.666
	142.06
	145.182
	143.905
	139.913
	139.01
	141.45
	143.224
	145.968
	146.712
	142.679
	139.149
	138.647
	141.698
	141.669
	142.86
	139.505
	138.851
	140.236
	141.753
	143.611
	145.248
	145.174
	145.539
	143.965
	146.02
	146.931
	143.541
	145.506
	145.31
	144.161
	145.665
	144.505
	141.905
	141.616
	141.071
	140.578
	140.793
	136.86
	138.565
	141.592
	144.196
	142.1
	144.772
	143.519
	141.222
	140.214
	141.871
	143.362
	147.732
	148.585
	145.097
	142.648
	143.962
	144.334
	142.89
	144.507
	145.351
	143.636
	142.81
	141.964
	142.102
	144.545
	143.152
	142.669
	146.056
	145.475
	143.415
	143.104
	142.686
	140.674
	142.823
	141.196
	142.019
	142.478
	141.074
	142.69
	142.082
	141.8
	142.051
	142.849
	142.135
	140.444
	141.962
	140.579
	141.156
	144.313
	143.741
	143.041
	145.061
	145.073
	145.091
	145.693
	143.35
	142.687
	141.637
	143.543
	145.278
	140.926
	142.869
	142.938
	142.849
	146.993
	147.258
	145.388
	143.385
	145.182
	147.141
	145.324
	144.646
	143.24
	143.817
	140.539
	140.656
	141.564
	142.854
	140.667
	140.418
	140.554
	143.202
	144.195
	144.721
	146.89
	146.805
	143.926
	143.517
	144.554
	143.452
	142.144
	142.764
	142.888
	141.76
	141.11
	141.425
	140.094
	142.664
	142.966
	145.002
	146.232
	145.977
	146.579
	146.267
	142.482
	139.752
	142.397
	144.724
	144.345
	145.686
	144.165
	145.562
	143.338
	144.781
	140.774
	139.311
	142.688
	145.651
	145.511
	143.461
	142.988
	144.226
	144.431
	147.958
	150.74
	146.637
	141.954
	139.703
	138.498
	141.732
	142.229
	140.789
	140.544
	138.1
	139.277
	142.419
	143.031
	139.895
	140.168
	143.325
	144.922
	144.279
	141.952
	141.466
	143.857
	142.586
	143.346
	142.528
	143.406
	145.101
	144.659
	145.62
	144.254
	145.218
	141.553
	143.142
	145.722
	146.149
	144.645
	144.68
	146.836
	144.094
	145.923
	144.25
	143.033
	145.041
	144.018
	146.476
	145.599
	144.539
	145.918
	146.159
	147.616
	145.997
	147.713
	148.187
	148.999
	146.663
	144.342
	142.51
	146.611
	145.563
	143.573
	144.336
	141.434
	143.838
	142.234
	142.835
	145.674
	143.49
	144.109
	142.578
	141.458
	141.801
	145.026
	143.086
	141.318
	141.661
	139.278
	138.959
	138.093
	140.192
	138.25
	143.405
	141.857
	141.827
	142.825
	144.559
	146.978
	146.556
	145.848
	145.322
	144.741
	144.583
	144.887
	144.903
	142.068
	140.518
	141.147
	141.057
	139.89
	140.141
	140.687
	141.704
	146.484
	149.312
	149.468
	144.253
	141.676
	145.448
	146.998
	145.11
	141.303
	143.051
	143.244
	143.024
	143.471
	145.11
	144.439
	143.976
	143.328
	139.341
	140.792
	142.131
	142.894
	142.96
	140.105
	142.061
	140.84
	139.182
	140.4
	145.681
	142.831
	140.844
	141.669
	144.01
	144.718
	141.112
	140.416
	138.837
	140.166
	141.298
	143.471
	145.003
	143.255
	143.979
	145.321
	144.977
	144.128
	143.63
	144.35
	142.042
	140.176
	139.956
	139.948
	141.808
	143.447
	144.111
	143.977
	143.637
	143.887
	142.229
	144.133
	144.161
	143.065
	142.297
	144.18
	143.498
	140.051
	140.217
	141.314

## Sheet: One sim - SD fil length
2.22061e-15	2.22061e-15
18.0729	18.2766
35.9131	36.1496
58.3227	57.6101
83.2148	84.1227
106.45	108.094
121.062	120.499
127.585	127.312
129.432	129.116
131.088	131.322
133.411	133.237
135.15	137.128
136.608	140.101
139.743	138.866
142.117	140.291
141.72	140.878
141.826	144.553
142.285	147.28
144.457	149.383
142.033	149.633
143.176	149.317
141.868	146.303
142.673	144.334
141.347	144.499
142.676	146.819
142.806	146.348
143.802	147.089
141.68	146.575
141.131	145.132
142.184	146.54
143.509	149.462
142.153	150.333
144.974	148.864
143.475	146.248
143.945	142.426
142.353	139.491
143.728	140.148
143.785	142.012
146.528	144.49
146.828	144.692
144.047	144.963
143.866	148.28
143.627	146.359
144.557	145.049
146.944	144.137
150.551	144.238
151.007	143.646
148.305	142.247
149.763	140.312
150.624	140.924
149.383	140.984
147.529	138.568
147.699	137.941
149.086	135.834
147.563	136.482
146.492	137.916
146.695	141.177
144.454	144.575
140.63	146.861
143.173	145.722
145.12	145.863
146.174	145.002
145.547	138.342
145.131	138.697
145.497	139.345
143.898	141.047
145.412	138.688
146.064	140.143
144.891	140.874
144.583	138.54
144.555	139.179
147.665	141.408
150.03	142.711
148.364	146.529
147.865	143.937
146.615	141.106
147.483	141.49
145.388	144.278
146.411	141.311
144.491	140.974
144.487	141.489
143.85	143.883
140.928	143.957
	145.353
	146.746
	144.649
	147.326
	145.882
	145.292
	145.351
	143.805
	142.236
	143.419
	144.082
	144.58
	143.341
	145.814
	144.558
	144.249
	141.842
	141.891
	142.408
	143.16
	141.77
	142.141
	139.568
	138.659
	138.978
	141.428
	142.663
	143.841
	144.852
	147.456
	147.137
	146.894
	144.757
	146.428
	148.598
	147.937
	149.213
	148.115
	146.143
	145.274
	146.807
	147.631
	149.006
	146.854
	145.023
	144.114
	143.917
	144.279
	142.756
	141.09
	139.074
	139.188
	137.945
	139.107
	137.325
	136.663
	139.776
	141.734
	142.27
	143.319
	140.949
	140.366
	142.117
	141.584
	140.676
	141.117
	143.405
	141.898
	143.232
	144.317
	143.476
	142.087
	142.911
	143.463
	142.089
	141.756
	144.422
	146.02
	142.832
	143.265
	142.759
	145.799
	146.159
	141.151
	141.099
	143.975
	146.925
	146.038
	146.066
	146.99
	143.801
	144.155
	144.909
	145.675
	146.347
	144.492
	145.259
	143.318
	143.862
	145.782
	146.923
	145.759
	145.821
	144.989
	143.054
	142.985
	145.083
	145.85
	144.352
	146.86
	147.135
	145.781
	144.107
	141.838
	140.191
	142.041
	145.19
	147.306
	150.237
	147.543
	149.849
	145.94
	146.23
	144.027
	144.295
	143.623
	144.205
	145.613
	144.075
	141.845
	140.681
	142.295
	146.058
	149.17
	150.465
	147.306
	146.376
	143.474
	142.208
	142.902
	145.073
	145.839
	144.446
	146.345
	145.666
	144.167
	141.495
	140.827
	140.774
	141.411
	143.224
	145.239
	147.139
	144.764
	144.875
	141.87
	143.793
	140.633
	143.274
	143.585
	143.086
	142.907
	144.055
	148.369
	148.992
	148.865
	148.055
	147.519
	147.025
	143.865
	144.208
	144.171
	143.185
	144.605
	143.562
	144.447
	144.073
	147.917
	148.306
	147.373
	141.321
	139.976
	141.729
	142.247
	144.512
	143.228
	143.061
	138.081
	137.202
	137.44
	140.818
	144.095
	145.08
	145.452
	143.048
	143.196
	144.215
	141.221
	141.112
	140.359
	141.236
	142.54
	144.57
	143.696
	143.325
	146.623
	145.43
	142.396
	142.665
	142.072
	143.487
	144.271
	142.402
	142.299
	142.501
	141.534
	141.417
	139.982
	139.838
	141.008
	143.282
	142.995
	140.542
	138.907
	141.634
	142.147
	142.652
	141.77
	144.447
	145.803
	148.394
	144.819
	142.8
	145.906
	146.515
	145.263
	145.201
	143.888
	146.532
	146.138
	145.808
	147.398
	149.611
	151.43
	152.178
	151.677
	147.917
	147.844
	146.302
	146.883
	151.17
	153.784
	148.843
	144.461
	146.019
	149.184
	151.611
	149.964
	148.294
	147.705
	146.129
	147.851
	148.643
	147.891
	144.173
	144.811
	145.234
	145.562
	147.108
	146.958
	148.801
	148.158
	147.446
	145.179
	143.774
	143.849
	143.706
	148.248
	150.458
	150.347
	146.995
	143.834
	143.21
	144.427
	147.313
	146.37
	148.284
	146.603
	146.002
	143.446
	142.258
	142.045
	141.195
	142.819
	143.798
	144.856
	145.694
	143.815
	142.874
	144.21
	145.878
	147
	147.68
	149.506
	149.464
	149.327
	149.193
	147.717
	148.027
	145.978
	147.805
	146.569
	142.336
	142.951
	139.373
	142.48
	143.735
	142.224
	142.177
	142.736
	140.586
	140.154
	142.097
	141.496
	143.881
	143.335
	143.451
	144.211
	142.79
	141.666
	143.489
	144.413
	146.607
	144.952
	142.452
	140.873
	144.186
	143.945
	144.974
	144.995
	141.486
	142.037
	140.152
	140.633
	142.885
	144.145
	145.376
	144.77
	147.39
	149.896
	145.147
	146.414
	148.572
	148.331
	147.479
	145.773
	143.357
	144.195
	142.692
	143.908
	144.509
	141.967
	139.359
	139.809
	144.161
	145.449
	144.987
	143.837
	144.52
	143.072
	142.477
	143.989
	144.873
	146.547
	149.62
	146.84
	147.185
	147.967
	145.747
	145.347
	146.461
	148.85
	149.695
	150.308
	150.025
	149.234
	148.282
	146.825
	148.298
	147.042
	149.489
	146.505
	146.27
	145.58
	144.294
	145.028
	145.895
	140.892
	144.095
	144.857
	144.332
	143.148
	143.577
	144.964
	145.152
	147.753
	146.837
	147.274
	145.041
	146.196
	147.04
	147.526
	149.744
	149.109
	146.823
	145.977
	146.378
	147.558
	146.343
	144.283
	145.924
	143.105
	143.031
	143.626
	141.862
	146.778
	146.157
	146.547
	149.307
	149.698
	149.722
	149.556
	149.396
	149.573
	149.02
	147.069
	145.497
	144.15
	145.334
	146.119
	144.29
	144.146
	142.104
	143.201
	145
	147.58
	150.172
	145.81
	145.172
	145.673
	145.473
	145.121
	143.553
	144.346
	146.118
	147.37
	146.534
	141.509
	142.281
	142.475
	143.029
	143.564
	145.793
	147.478
	148.277
	147.513
	146.706
	148.114
	146.47
	146.357
	146.035
	144.826
	146.53
	147.348
	148.399
	146.333
	143.99
	143.717
	144.553
	146.416
	142.524
	142.739
	145.059
	144.363
	147.334
	149.015
	151.088
	147.13
	146.027
	142.782
	144.621
	145.127
	145.302
	143.649
	144.56
	140.166
	141.993
	142.645
	143.085
	141.507
	144.653
	147.9
	146.577
	145.112
	143.154
	145.408
	146.378
	145.063
	145.129
	144.135
	145.358
	146.772
	147.844
	148.36
	147.687
	146.192
	146.035
	148.713
	147.743
	149.513
	148.494
	150.011
	148.754
	149.899
	147.728
	146.306
	147.066
	148.246
	147.969
	150.877
	147.886
	147.492
	144.279
	145.799
	145.885
	146.619
	147.989
	150.933
	150.745
	150.862
	148.299
	150.501
	151.603
	150.718
	150.753
	149.452
	146.451
	145.128
	141.867
	143.778
	143.999
	142.884
	145.194
	141.009
	140.612
	142.58
	144.597
	142.217
	140.043
	140.465
	140.184
	137.946
	138.874
	138.798
	141.689
	142.536
	145.523
	144.615
	145.896
	145.145
	145.023
	148.496
	147.172
	146.681
	144.909
	144.997
	146.333
	146.306
	143.809
	142.619
	143.75
	143.831
	143.778
	143.007
	144.385
	145.859
	147.98
	146.34
	146.649
	146.347
	146.767
	146.439
	144.937
	145.309
	143.991
	144.297
	144.808
	146.331
	146.581
	144.957
	141.769
	140.165
	140.325
	142.348
	145.06
	145.846
	147.214
	144.453
	147.736
	143.734
	142.856
	143.998
	147.11
	145.067
	145.663
	146.043
	146.436
	146.396
	144.479
	143.634
	142.606
	140.925
	142.843
	141.65
	143.69
	143.351
	144.881
	148.923
	147.74
	146.58
	143.873
	145.262
	145.909
	144.245
	140.695
	138.571
	138.222
	141.771
	143.852
	144.174
	145.184
	145.445
	145.323
	148.891
	149.248
	147.417
	148.109
	147.621
	147.194
	145.833
	145.391
	146.057

## Sheet: One sim - Time(s) - Fil length
8.65309e-05	8.65309e-05
0.1362	0.1362
0.272313	0.272313
0.408426	0.408426
0.544539	0.544539
0.680652	0.680652
0.816765	0.816765
0.952878	0.952878
1.08899	1.08899
1.2251	1.2251
1.36122	1.36122
1.49733	1.49733
1.63344	1.63344
1.76956	1.76956
1.90567	1.90567
2.04178	2.04178
2.1779	2.1779
2.31401	2.31401
2.45012	2.45012
2.58623	2.58623
2.72235	2.72235
2.85846	2.85846
2.99457	2.99457
3.13069	3.13069
3.2668	3.2668
3.40291	3.40291
3.53903	3.53903
3.67514	3.67514
3.81125	3.81125
3.94736	3.94736
4.08348	4.08348
4.21959	4.21959
4.3557	4.3557
4.49182	4.49182
4.62793	4.62793
4.76404	4.76404
4.90016	4.90016
5.03627	5.03627
5.17238	5.17238
5.30849	5.30849
5.44461	5.44461
5.58072	5.58072
5.71683	5.71683
5.85295	5.85295
5.98906	5.98906
6.12517	6.12517
6.26129	6.26129
6.3974	6.3974
6.53351	6.53351
6.66963	6.66963
6.80574	6.80574
6.94185	6.94185
7.07796	7.07796
7.21408	7.21408
7.35019	7.35019
7.4863	7.4863
7.62242	7.62242
7.75853	7.75853
7.89464	7.89464
8.03076	8.03076
8.16687	8.16687
8.30298	8.30298
8.43909	8.43909
8.57521	8.57521
8.71132	8.71132
8.84743	8.84743
8.98355	8.98355
9.11966	9.11966
9.25577	9.25577
9.39189	9.39189
9.528	9.528
9.66411	9.66411
9.80022	9.80022
9.93634	9.93634
10.0725	10.0725
10.2086	10.2086
10.3447	10.3447
10.4808	10.4808
10.6169	10.6169
10.753	10.753
10.8891	10.8891
11.0252	11.0252
11.1614	11.1614
11.2975	11.2975
11.4336	11.4336
11.5697	11.5697
11.7058	11.7058
	11.8419
	11.978
	12.1141
	12.2503
	12.3864
	12.5225
	12.6586
	12.7947
	12.9308
	13.0669
	13.2031
	13.3392
	13.4753
	13.6114
	13.7475
	13.8836
	14.0197
	14.1558
	14.292
	14.4281
	14.5642
	14.7003
	14.8364
	14.9725
	15.1086
	15.2447
	15.3809
	15.517
	15.6531
	15.7892
	15.9253
	16.0614
	16.1975
	16.3337
	16.4698
	16.6059
	16.742
	16.8781
	17.0142
	17.1503
	17.2864
	17.4226
	17.5587
	17.6948
	17.8309
	17.967
	18.1031
	18.2392
	18.3753
	18.5115
	18.6476
	18.7837
	18.9198
	19.0559
	19.192
	19.3281
	19.4643
	19.6004
	19.7365
	19.8726
	20.0087
	20.1448
	20.2809
	20.417
	20.5532
	20.6893
	20.8254
	20.9615
	21.0976
	21.2337
	21.3698
	21.5059
	21.6421
	21.7782
	21.9143
	22.0504
	22.1865
	22.3226
	22.4587
	22.5948
	22.731
	22.8671
	23.0032
	23.1393
	23.2754
	23.4115
	23.5476
	23.6838
	23.8199
	23.956
	24.0921
	24.2282
	24.3643
	24.5004
	24.6365
	24.7727
	24.9088
	25.0449
	25.181
	25.3171
	25.4532
	25.5893
	25.7254
	25.8616
	25.9977
	26.1338
	26.2699
	26.406
	26.5421
	26.6782
	26.8144
	26.9505
	27.0866
	27.2227
	27.3588
	27.4949
	27.631
	27.7671
	27.9033
	28.0394
	28.1755
	28.3116
	28.4477
	28.5838
	28.7199
	28.856
	28.9922
	29.1283
	29.2644
	29.4005
	29.5366
	29.6727
	29.8088
	29.945
	30.0811
	30.2172
	30.3533
	30.4894
	30.6255
	30.7616
	30.8977
	31.0339
	31.17
	31.3061
	31.4422
	31.5783
	31.7144
	31.8505
	31.9866
	32.1228
	32.2589
	32.395
	32.5311
	32.6672
	32.8033
	32.9394
	33.0756
	33.2117
	33.3478
	33.4839
	33.62
	33.7561
	33.8922
	34.0283
	34.1645
	34.3006
	34.4367
	34.5728
	34.7089
	34.845
	34.9811
	35.1172
	35.2534
	35.3895
	35.5256
	35.6617
	35.7978
	35.9339
	36.07
	36.2062
	36.3423
	36.4784
	36.6145
	36.7506
	36.8867
	37.0228
	37.1589
	37.2951
	37.4312
	37.5673
	37.7034
	37.8395
	37.9756
	38.1117
	38.2478
	38.384
	38.5201
	38.6562
	38.7923
	38.9284
	39.0645
	39.2006
	39.3368
	39.4729
	39.609
	39.7451
	39.8812
	40.0173
	40.1534
	40.2895
	40.4257
	40.5618
	40.6979
	40.834
	40.9701
	41.1062
	41.2423
	41.3784
	41.5146
	41.6507
	41.7868
	41.9229
	42.059
	42.1951
	42.3312
	42.4674
	42.6035
	42.7396
	42.8757
	43.0118
	43.1479
	43.284
	43.4201
	43.5563
	43.6924
	43.8285
	43.9646
	44.1007
	44.2368
	44.3729
	44.509
	44.6452
	44.7813
	44.9174
	45.0535
	45.1896
	45.3257
	45.4618
	45.598
	45.7341
	45.8702
	46.0063
	46.1424
	46.2785
	46.4146
	46.5507
	46.6869
	46.823
	46.9591
	47.0952
	47.2313
	47.3674
	47.5035
	47.6396
	47.7758
	47.9119
	48.048
	48.1841
	48.3202
	48.4563
	48.5924
	48.7286
	48.8647
	49.0008
	49.1369
	49.273
	49.4091
	49.5452
	49.6813
	49.8175
	49.9536
	50.0897
	50.2258
	50.3619
	50.498
	50.6341
	50.7702
	50.9064
	51.0425
	51.1786
	51.3147
	51.4508
	51.5869
	51.723
	51.8592
	51.9953
	52.1314
	52.2675
	52.4036
	52.5397
	52.6758
	52.8119
	52.9481
	53.0842
	53.2203
	53.3564
	53.4925
	53.6286
	53.7647
	53.9008
	54.037
	54.1731
	54.3092
	54.4453
	54.5814
	54.7175
	54.8536
	54.9898
	55.1259
	55.262
	55.3981
	55.5342
	55.6703
	55.8064
	55.9425
	56.0787
	56.2148
	56.3509
	56.487
	56.6231
	56.7592
	56.8953
	57.0314
	57.1676
	57.3037
	57.4398
	57.5759
	57.712
	57.8481
	57.9842
	58.1204
	58.2565
	58.3926
	58.5287
	58.6648
	58.8009
	58.937
	59.0731
	59.2093
	59.3454
	59.4815
	59.6176
	59.7537
	59.8898
	60.0259
	60.162
	60.2982
	60.4343
	60.5704
	60.7065
	60.8426
	60.9787
	61.1148
	61.251
	61.3871
	61.5232
	61.6593
	61.7954
	61.9315
	62.0676
	62.2037
	62.3399
	62.476
	62.6121
	62.7482
	62.8843
	63.0204
	63.1565
	63.2926
	63.4288
	63.5649
	63.701
	63.8371
	63.9732
	64.1093
	64.2454
	64.3816
	64.5177
	64.6538
	64.7899
	64.926
	65.0621
	65.1982
	65.3343
	65.4705
	65.6066
	65.7427
	65.8788
	66.0149
	66.151
	66.2871
	66.4232
	66.5594
	66.6955
	66.8316
	66.9677
	67.1038
	67.2399
	67.376
	67.5122
	67.6483
	67.7844
	67.9205
	68.0566
	68.1927
	68.3288
	68.4649
	68.6011
	68.7372
	68.8733
	69.0094
	69.1455
	69.2816
	69.4177
	69.5538
	69.69
	69.8261
	69.9622
	70.0983
	70.2344
	70.3705
	70.5066
	70.6427
	70.7789
	70.915
	71.0511
	71.1872
	71.3233
	71.4594
	71.5955
	71.7317
	71.8678
	72.0039
	72.14
	72.2761
	72.4122
	72.5483
	72.6844
	72.8206
	72.9567
	73.0928
	73.2289
	73.365
	73.5011
	73.6372
	73.7733
	73.9095
	74.0456
	74.1817
	74.3178
	74.4539
	74.59
	74.7261
	74.8623
	74.9984
	75.1345
	75.2706
	75.4067
	75.5428
	75.6789
	75.815
	75.9512
	76.0873
	76.2234
	76.3595
	76.4956
	76.6317
	76.7678
	76.9039
	77.0401
	77.1762
	77.3123
	77.4484
	77.5845
	77.7206
	77.8567
	77.9929
	78.129
	78.2651
	78.4012
	78.5373
	78.6734
	78.8095
	78.9456
	79.0818
	79.2179
	79.354
	79.4901
	79.6262
	79.7623
	79.8984
	80.0345
	80.1707
	80.3068
	80.4429
	80.579
	80.7151
	80.8512
	80.9873
	81.1235
	81.2596
	81.3957
	81.5318
	81.6679
	81.804
	81.9401
	82.0762
	82.2124
	82.3485
	82.4846
	82.6207
	82.7568
	82.8929
	83.029
	83.1651
	83.3013
	83.4374
	83.5735
	83.7096
	83.8457
	83.9818
	84.1179
	84.2541
	84.3902
	84.5263
	84.6624
	84.7985
	84.9346
	85.0707
	85.2068
	85.343
	85.4791
	85.6152
	85.7513
	85.8874
	86.0235
	86.1596
	86.2957
	86.4319
	86.568
	86.7041
	86.8402
	86.9763
	87.1124
	87.2485
	87.3847
	87.5208
	87.6569
	87.793
	87.9291
	88.0652
	88.2013
	88.3374
	88.4736
	88.6097
	88.7458
	88.8819
	89.018
	89.1541
	89.2902
	89.4263
	89.5625
	89.6986
	89.8347
	89.9708
	90.1069
	90.243
	90.3791
	90.5153
	90.6514
	90.7875
	90.9236
	91.0597
	91.1958
	91.3319
	91.468
	91.6042
	91.7403
	91.8764
	92.0125
	92.1486
	92.2847
	92.4208
	92.5569
	92.6931
	92.8292
	92.9653
	93.1014
	93.2375
	93.3736
	93.5097
	93.6459
	93.782
	93.9181
	94.0542
	94.1903
	94.3264
	94.4625
	94.5986
	94.7348
	94.8709
	95.007
	95.1431
	95.2792
	95.4153
	95.5514
	95.6875
	95.8237
	95.9598
	96.0959
	96.232
	96.3681
	96.5042
	96.6403
	96.7765
	96.9126
	97.0487
	97.1848
	97.3209
	97.457
	97.5931
	97.7292
	97.8654
	98.0015
	98.1376
	98.2737
	98.4098
	98.5459
	98.682
	98.8181
	98.9543
	99.0904
	99.2265
	99.3626
	99.4987
	99.6348
	99.7709
	99.9071

## Sheet: One sim - Mean fil angle
20.6609	27.9798
49.6065	71.5311
49.771	73.4945
50.4367	46.6861
50.7386	59.0311
50.7809	43.0987
50.9621	43.4059
50.2236	58.1509
50.161	57.7996
50.6058	61.9804
50.3422	61.611
50.1605	44.6322
50.0109	44.4109
58.5531	44.0268
48.0286	43.7829
47.904	43.6232
47.7836	44.9045
46.8675	44.8636
42.9913	43.519
45.9902	44.5541
45.6428	44.325
45.3323	44.1597
45.129	43.7698
47.7542	43.7264
47.541	39.4727
42.7708	44.0735
42.2726	44.0534
41.9079	44.0176
41.6152	44.4781
41.5306	39.9264
40.1042	39.7137
38.9553	39.7138
38.8526	39.6962
38.8711	39.4462
38.7944	39.4404
38.8757	39.3388
41.6726	39.4545
40.8472	39.7791
40.8062	40.0859
40.6848	45.2471
42.887	44.7537
42.9661	43.4093
40.3529	40.5573
44.192	43.5162
44.3831	38.1686
44.7457	38.0276
44.8984	43.5586
45.0783	43.6913
44.3169	42.1786
50.1933	40.1902
50.318	42.1621
41.2409	42.105
41.102	41.8509
42.6043	41.7141
42.6652	41.5478
43.3803	41.4995
42.4253	37.9058
43.9388	41.3857
44.197	40.2947
44.1035	40.2187
44.1477	40.0353
44.1137	40.2587
44.1232	40.6794
43.7221	40.8686
42.7066	40.836
42.0103	40.817
42.1489	40.7302
44.5795	40.6161
42.3823	44.6232
42.5167	44.9333
42.5167	39.5289
42.4586	39.6746
42.2718	39.9587
44.1824	40.141
44.4272	40.2007
45.7403	40.8995
45.8286	40.8017
43.3345	45.3832
43.1551	45.2589
43.0815	42.0422
45.8742	41.8205
45.8902	41.6327
45.8973	41.6283
45.8973	41.8621
45.8973	43.1862
45.8973	43.5466
45.9075	43.741
	40.1512
	43.4186
	42.1401
	38.8018
	38.7398
	40.0807
	40.6657
	40.22
	47.0693
	47.3679
	47.4457
	47.362
	39.6754
	41.7266
	42.0119
	42.2704
	42.3845
	43.8302
	42.5386
	42.4001
	42.1879
	41.7115
	41.4435
	41.2342
	41.1847
	43.8427
	41.124
	41.0977
	41.2271
	44.9352
	44.7094
	37.7661
	37.6955
	41.0271
	41.2227
	41.1368
	41.2562
	41.403
	41.513
	39.3465
	39.2355
	39.2355
	43.5142
	39.4115
	39.3436
	37.4187
	37.3031
	37.0591
	37.0478
	37.3519
	40.6363
	40.8583
	40.8619
	40.7173
	40.3754
	40.394
	42.913
	42.6465
	42.5085
	42.475
	42.396
	42.5728
	40.0318
	40.2223
	40.3267
	40.3924
	40.6798
	40.8993
	43.093
	42.9952
	43.8858
	39.7379
	39.8333
	41.3176
	40.2557
	40.0643
	39.8013
	40.5365
	40.6187
	41.7488
	38.627
	38.6631
	41.6248
	41.5471
	41.5007
	40.3581
	40.7379
	40.9333
	41.6453
	41.7523
	44.591
	39.0649
	38.9587
	38.8058
	38.6163
	38.339
	38.486
	40.4339
	41.4673
	42.7699
	42.582
	42.736
	42.9408
	43.1569
	45.5716
	45.5673
	40.8281
	40.9059
	44.7545
	42.3066
	42.2833
	42.2616
	37.4932
	37.7392
	37.991
	43.0661
	43.0248
	42.9231
	42.6151
	42.1783
	41.8766
	41.8204
	41.6553
	40.1605
	40.2401
	40.6777
	41.1594
	42.7891
	43.0846
	43.1966
	44.4859
	44.7595
	45.1122
	45.2268
	39.1761
	38.9631
	42.3965
	42.2236
	42.104
	45.7274
	42.0854
	42.0839
	42.0176
	41.9238
	41.9543
	42.0176
	42.132
	42.8619
	42.9868
	42.7567
	42.4293
	42.1898
	44.0783
	43.9999
	39.9475
	39.7741
	39.4467
	39.8375
	39.2558
	39.9996
	40.0956
	40.2334
	40.2653
	40.3371
	40.5317
	40.8579
	41.1424
	41.3206
	41.3463
	41.4721
	41.4196
	41.5446
	44.8128
	44.9393
	45.1592
	44.7016
	44.5972
	44.5497
	41.2401
	38.9962
	38.7217
	38.6044
	43.5196
	43.6399
	43.7561
	39.2511
	39.2151
	39.0013
	39.0692
	44.4704
	44.471
	44.647
	44.3866
	44.3838
	40.8818
	43.0542
	38.8239
	38.8239
	38.8905
	37.6733
	42.9609
	41.6374
	41.779
	42.0625
	42.2471
	42.0933
	41.798
	41.4262
	41.397
	41.4625
	38.5576
	38.4922
	43.4145
	43.8285
	42.6918
	40.2857
	40.2546
	40.1417
	40.6838
	39.0347
	39.1115
	39.0308
	38.9876
	43.6803
	43.4761
	40.5894
	39.0156
	38.9345
	38.848
	38.7966
	39.3317
	39.5375
	39.9524
	40.4615
	40.6556
	40.7299
	40.5566
	40.4442
	40.4141
	42.7429
	40.731
	40.5717
	40.5577
	39.0637
	43.6638
	41.1685
	42.8241
	41.2939
	41.2392
	41.1041
	40.3545
	39.8859
	38.8285
	39.5569
	39.1752
	41.6193
	41.6075
	41.7644
	42.2078
	42.5796
	42.3189
	42.2773
	39.4911
	44.8238
	43.381
	39.2687
	39.0706
	39.0681
	39.097
	40.6079
	41.6475
	38.5569
	38.3394
	38.5828
	40.3636
	42.1775
	38.5098
	38.3603
	41.9697
	42.1886
	42.3007
	40.5413
	40.5556
	40.5439
	40.5541
	40.5908
	44.2844
	44.6841
	44.8935
	39.1035
	39.0975
	43.0334
	38.1445
	41.2295
	41.3409
	42.372
	42.6336
	38.1458
	38.2094
	38.2276
	38.1135
	39.0673
	39.038
	47.0978
	46.6888
	39.9821
	39.8456
	39.9345
	40.1511
	40.4373
	40.3538
	40.0561
	39.5882
	39.342
	39.3781
	38.3607
	45.0425
	44.9217
	41.2592
	41.376
	41.5196
	41.6265
	42.0381
	42.1481
	41.9132
	41.7363
	41.5796
	41.6423
	41.7584
	42.8428
	41.1058
	40.9247
	38.7904
	38.9473
	38.9864
	39.0362
	44.4181
	45.5725
	41.326
	42.9779
	43.0107
	43.1621
	43.289
	43.3197
	43.3197
	41.7404
	41.5884
	40.7047
	46.2973
	46.1068
	45.8001
	45.5688
	39.9419
	39.9653
	39.9655
	39.9888
	40.0821
	40.122
	40.1626
	40.3376
	40.3788
	42.9176
	43.0691
	43.1981
	40.1504
	40.1504
	39.9341
	39.8524
	39.832
	39.7629
	39.613
	38.1602
	38.1406
	38.2571
	38.5028
	38.6873
	38.7174
	38.5944
	38.5263
	38.6304
	43.1662
	43.168
	43.1054
	41.4546
	41.5733
	39.9275
	39.9927
	43.0633
	42.7972
	42.7613
	39.6439
	46.0337
	40.7783
	46.6592
	45.5853
	38.9314
	38.7157
	38.6862
	38.4643
	38.265
	38.1314
	38.3241
	38.6151
	41.1806
	41.5542
	39.9516
	44.5679
	39.854
	39.7982
	39.8016
	39.6286
	41.1339
	38.8391
	38.7394
	38.8604
	44.251
	38.9517
	38.8699
	38.9517
	39.0477
	38.9665
	43.7213
	44.0517
	44.5533
	44.6272
	42.2362
	43.4173
	43.4445
	43.3904
	43.5267
	41.9728
	41.7518
	38.8794
	38.9466
	42.3424
	42.5687
	42.5066
	42.5639
	42.4906
	41.3347
	41.1258
	41.0908
	41.3789
	41.3966
	40.8389
	40.8085
	40.454
	40.2804
	40.1334
	40.6179
	40.7798
	40.9384
	45.2264
	39.169
	42.8295
	39.2329
	40.0352
	40.0421
	43.7502
	43.6038
	43.4236
	40.3294
	40.0964
	37.12
	40.2658
	40.3989
	37.4945
	38.9438
	38.9549
	39.0904
	37.9436
	37.8731
	39.4883
	39.3999
	37.8236
	37.7025
	37.1392
	37.038
	37.1392
	36.9664
	38.3606
	39.3482
	39.4374
	37.396
	37.2769
	38.679
	39.7899
	39.8768
	40.0294
	38.6904
	38.8029
	41.4313
	41.4762
	41.6147
	38.5536
	37.8601
	38.6747
	39.7003
	40.2169
	40.3856
	40.5678
	42.7752
	41.0704
	41.1363
	41.3021
	41.3382
	39.9459
	40.0012
	42.7878
	42.8973
	38.9537
	38.6796
	41.3583
	41.4312
	41.4953
	41.8661
	41.6219
	39.1787
	39.0232
	39.3234
	39.3149
	39.2415
	39.284
	39.5874
	38.1324
	39.8361
	39.6083
	39.5397
	39.4345
	39.4369
	39.2474
	39.2284
	40.8437
	41.121
	41.121
	40.833
	40.5587
	38.3045
	38.3418
	38.3707
	38.3816
	43.951
	40.707
	40.8693
	42.6523
	42.3532
	42.3459
	43.3287
	43.2073
	43.0984
	42.765
	40.5621
	40.2641
	40.5518
	40.3981
	38.2646
	37.9632
	39.171
	39.2286
	39.4459
	38.7268
	38.6061
	39.724
	39.6854
	39.8415
	40.4056
	40.3787
	41.582
	41.6976
	41.7283
	43.5353
	41.2341
	41.3472
	41.6651
	41.8029
	41.2858
	41.1921
	39.9333
	40.0502
	40.2575
	42.6858
	42.5391
	42.4517
	42.5016
	42.6762
	40.8203
	43.6692
	43.7829
	44.0246
	44.2112
	44.1436
	43.9391
	43.7733
	43.7677
	40.3269
	40.1193
	40.0402
	40.0269
	39.8019
	39.6428
	39.5078
	43.1179
	39.6611
	39.7204
	39.8524
	39.8524
	39.0822
	39.0674
	39.0674
	39.8212
	39.9396
	39.8075
	39.7052
	38.2382
	38.2666
	42.4145
	42.4145
	42.4389
	43.6638
	44.0849
	44.2739
	44.0752
	39.4825
	38.9575
	37.9215
	40.2346
	40.7756
	39.4093
	39.4571
	39.3346
	40.5597
	40.6506
	40.8308
	40.8417
	40.8394
	40.9515
	41.0247
	41.0031
	40.7935
	40.9528
	40.4978
	40.7062
	40.5492
	40.4636
	40.3631
	43.7484
	43.7653
	43.6776

## Sheet: One sim - SD fil angle
12.4438	16.4694
20.1894	16.1705
20.0414	17.623
19.7663	19.6742
19.5895	19.3991
19.4239	19.3294
19.2886	19.15
19.1682	19.3831
19.0483	19.4147
19.1162	19.7458
19.0844	19.8828
19.0472	18.3222
18.9248	18.2065
19.5381	18.1264
18.6067	18.0896
18.5566	18.0304
18.4778	18.2127
18.3957	18.1927
17.9392	18.047
18.1879	18.1941
18.0345	18.1864
17.9524	18.1505
17.8688	18.0433
18.3881	17.978
18.3471	17.18
17.4593	17.9908
17.4099	17.969
17.3015	17.9876
17.1831	18.0924
17.134	17.2195
17.0733	17.0424
16.5301	16.9196
16.5081	16.912
16.491	16.978
16.55	17.086
16.6291	17.0457
17.2455	17.0678
17.1688	17.1519
17.1549	17.2529
17.1556	18.261
17.5959	18.0462
17.5409	17.8108
17.0319	17.6101
17.8841	17.8869
17.9673	16.9203
18.0231	16.9657
18.0547	18.1691
18.0867	18.2532
17.765	18.1384
19.2516	17.7315
19.3275	17.9805
17.4851	17.91
17.5234	17.9193
17.7374	17.9432
17.6597	17.937
17.6041	17.818
17.2671	16.4376
17.4368	17.6869
17.5868	17.4729
17.6255	17.3656
17.7335	17.2438
17.6878	17.2174
17.6556	17.2735
17.5121	17.3021
17.4203	17.326
17.4118	17.2843
17.5597	17.2448
17.8995	17.2773
17.6252	18.1091
17.6298	18.2768
17.5747	17.6185
17.5648	17.8251
17.4821	17.8143
17.8	17.7695
17.6431	17.6411
17.8392	17.6226
17.8015	17.5301
17.319	18.5222
17.361	18.5399
17.4597	17.5922
18.1435	17.5286
18.1036	17.539
18.0549	17.5532
18.0549	17.635
18.0549	18.0388
18.0549	18.0303
18.0323	17.9362
	17.3724
	17.987
	17.8293
	17.2777
	17.2849
	17.4741
	17.5806
	17.5689
	18.9765
	19.0661
	19.0575
	19.0119
	17.8298
	18.0517
	18.0786
	18.1146
	18.1073
	18.068
	18.1364
	18.1852
	18.2143
	18.1273
	18.0247
	18.022
	18.0269
	18.3259
	17.8793
	17.7647
	17.6205
	18.2251
	18.2244
	16.0014
	16.0114
	17.2454
	17.2708
	17.3372
	17.4444
	17.579
	17.6977
	17.5301
	17.5748
	17.5279
	18.0128
	17.6071
	17.5551
	16.3581
	16.236
	16.2081
	16.2507
	16.3111
	17.4206
	17.3045
	17.2242
	17.1599
	17.0551
	17.0838
	17.7651
	17.7019
	17.6797
	17.711
	17.7779
	17.8004
	17.2829
	17.28
	17.3486
	17.4599
	17.5673
	17.6389
	17.9841
	18.0633
	18.4401
	17.2597
	17.2235
	17.5006
	17.3893
	17.4117
	17.3405
	17.4948
	17.5701
	17.8913
	16.989
	16.9037
	17.7076
	17.6193
	17.5649
	17.3814
	17.374
	17.3467
	17.4391
	17.4984
	18.1639
	16.7977
	16.9292
	17.0411
	17.0359
	16.6833
	16.6196
	17.3443
	17.5786
	17.8902
	17.9214
	17.8839
	17.8694
	17.8984
	18.4936
	18.6749
	17.7486
	17.6463
	18.3621
	17.7695
	17.7073
	17.6523
	15.8018
	15.7492
	15.7707
	17.4413
	17.4991
	17.4925
	17.4176
	17.3142
	17.242
	17.173
	17.1301
	16.8513
	17.0611
	17.3052
	17.4761
	17.7676
	17.766
	17.7381
	17.9855
	18.041
	18.11
	18.1401
	17.1826
	17.2068
	17.8039
	17.7827
	17.7872
	18.4862
	17.8595
	17.9083
	17.9077
	17.854
	17.7873
	17.8176
	17.9065
	17.9197
	17.9033
	17.8684
	17.7932
	17.6914
	18.1805
	18.2107
	17.2099
	17.2596
	17.3834
	17.5434
	17.497
	17.5801
	17.6109
	17.6269
	17.6849
	17.6522
	17.7258
	17.7367
	17.7934
	17.7867
	17.8184
	17.8447
	17.8409
	17.8039
	18.0817
	18.0888
	18.1948
	18.1341
	18.0728
	18.0951
	17.5688
	17.2769
	17.1716
	17.1291
	18.2335
	18.2611
	18.2944
	17.1023
	17.0515
	17.0892
	17.14
	18.2918
	18.333
	18.3599
	18.3225
	18.2855
	17.4045
	17.9403
	16.9002
	16.8579
	16.8954
	15.9466
	17.8876
	17.396
	17.3861
	17.4492
	17.5398
	17.5782
	17.4627
	17.4017
	17.3784
	17.4258
	17.2387
	17.3029
	18.2572
	18.3788
	18.0698
	17.7354
	17.7075
	17.6103
	17.6124
	17.1875
	17.1327
	17.1315
	17.1403
	18.1001
	18.0247
	17.4584
	17.2012
	17.2572
	17.3381
	17.3619
	17.4143
	17.3746
	17.4237
	17.4732
	17.5509
	17.5636
	17.521
	17.4966
	17.4708
	17.8276
	17.6338
	17.6583
	17.7034
	17.3203
	18.1308
	17.2648
	17.7551
	17.2662
	17.3534
	17.4443
	17.3487
	17.1675
	17.1743
	17.1215
	17.0937
	17.5047
	17.5188
	17.633
	17.7114
	17.7236
	17.5745
	17.5228
	17.3494
	18.1592
	17.7769
	17.0757
	16.9334
	16.9631
	16.9891
	17.2013
	17.3916
	16.8938
	16.8945
	16.9575
	17.408
	17.7592
	17.0174
	17.0037
	17.8509
	17.8655
	17.9035
	17.4636
	17.3876
	17.3657
	17.3344
	17.4659
	18.1852
	18.3218
	18.3549
	17.3954
	17.371
	18.1759
	16.7922
	17.6874
	17.8534
	18.064
	18.2565
	17.0928
	17.1626
	17.1723
	17.2085
	17.9814
	17.957
	18.7201
	18.6603
	18.0957
	18.0392
	17.9821
	17.866
	17.6917
	17.5641
	17.4775
	17.4713
	17.4552
	17.4772
	17.1355
	18.5677
	18.6096
	17.5593
	17.6352
	17.7169
	17.8326
	17.7277
	17.5942
	17.3449
	17.367
	17.3889
	17.4744
	17.3789
	17.7289
	17.3545
	17.4168
	17.0145
	16.9863
	16.9576
	16.9105
	17.9828
	18.3698
	17.4792
	17.8622
	17.9605
	18.0076
	18.0012
	17.9627
	17.9353
	17.8805
	17.8853
	17.7479
	18.6771
	18.7028
	18.648
	18.5567
	17.1488
	17.1711
	17.1873
	17.115
	16.9868
	16.8978
	16.8844
	16.9917
	17.0839
	17.8049
	17.8799
	17.9199
	17.349
	17.3098
	17.2382
	17.1538
	17.1616
	17.1316
	17.1907
	16.6772
	16.6222
	16.564
	16.5966
	16.6808
	16.6985
	16.7539
	16.7667
	16.8664
	17.7633
	17.7901
	17.75
	17.3339
	17.3553
	17.3194
	17.3043
	17.4623
	17.4776
	17.5722
	17.4551
	18.4128
	17.6742
	18.5426
	18.3878
	17.3334
	17.1803
	17.0799
	16.9527
	16.8801
	16.8845
	17.0047
	17.1123
	17.5865
	17.5954
	17.3437
	18.2084
	17.2158
	17.1241
	17.0641
	17.1011
	17.3598
	17.1275
	17.0822
	16.982
	17.8765
	16.9543
	16.9811
	16.9388
	16.9387
	16.9713
	17.8459
	17.968
	18.0712
	18.1443
	17.8752
	17.9669
	18.0899
	18.1756
	18.2532
	18.2085
	18.0844
	17.2372
	17.0881
	17.8495
	17.8743
	17.9276
	17.9066
	17.8951
	17.8306
	17.8282
	17.782
	17.6672
	17.6372
	17.5887
	17.5478
	17.4281
	17.3525
	17.3212
	17.415
	17.3999
	17.3622
	18.3361
	17.0702
	17.5768
	17.2904
	17.3309
	17.3329
	18.131
	18.0684
	18.0204
	17.2526
	17.2173
	15.798
	17.1691
	17.2044
	15.9468
	17.0191
	16.9926
	16.9956
	16.0894
	16.0095
	16.9324
	16.9969
	16.3555
	16.3987
	15.8609
	15.7332
	15.576
	15.5397
	16.7249
	16.8216
	16.8275
	16.0201
	16.1075
	17.0397
	17.1708
	17.2166
	17.2511
	17.0038
	16.9406
	17.2996
	17.1359
	17.0858
	16.5331
	15.9785
	16.7127
	17.0937
	17.2334
	17.2779
	17.251
	17.7468
	17.3685
	17.4349
	17.5137
	17.5697
	17.4299
	17.5296
	17.6647
	17.7604
	17.1401
	17.0499
	17.8001
	17.7319
	17.7268
	17.7477
	17.773
	17.5463
	17.5224
	17.5763
	17.5872
	17.6032
	17.6103
	17.555
	16.4443
	17.3765
	17.3296
	17.2971
	17.3011
	17.31
	17.3689
	17.4266
	17.5837
	17.6273
	17.5888
	17.5632
	17.5098
	16.6044
	16.649
	16.7797
	16.955
	17.9551
	17.5008
	17.5136
	17.6778
	17.713
	17.7636
	18.0135
	17.9179
	17.8131
	17.6595
	17.2643
	17.263
	17.3327
	17.4653
	17.3167
	17.2678
	17.44
	17.465
	17.5291
	17.3869
	17.3662
	17.4924
	17.4663
	17.4545
	17.4961
	17.4102
	17.6699
	17.6893
	17.8162
	18.339
	17.7583
	17.7299
	17.7872
	17.816
	17.7284
	17.6267
	17.5619
	17.5738
	17.5658
	17.8696
	17.7652
	17.6465
	17.7164
	17.7634
	17.4296
	18.0618
	18.0833
	18.0824
	18.0764
	18.0396
	18.0791
	18.0922
	18.1133
	17.5335
	17.4818
	17.4005
	17.4103
	17.3139
	17.2401
	17.18
	18.0566
	17.155
	17.1557
	17.1676
	17.1544
	17.0119
	16.9991
	16.9808
	17.0148
	17.0436
	17.0427
	17.0643
	16.8961
	17.0226
	17.7509
	17.7059
	17.6978
	18.0515
	18.0758
	18.1262
	18.1333
	17.4509
	17.3029
	16.5789
	17.3818
	17.3838
	17.2754
	17.2918
	17.3403
	17.5108
	17.6231
	17.6789
	17.7354
	17.7963
	17.7958
	17.6753
	17.5386
	17.4572
	17.4737
	17.2986
	17.1404
	17.0254
	16.9306
	17.0344
	18.1739
	18.2401
	18.2598

## Sheet: One sim - Time(s) - Fil angle
8.65309e-05	8.65309e-05
0.1362	0.1362
0.272313	0.272313
0.408426	0.408426
0.544539	0.544539
0.680652	0.680652
0.816765	0.816765
0.952878	0.952878
1.08899	1.08899
1.2251	1.2251
1.36122	1.36122
1.49733	1.49733
1.63344	1.63344
1.76956	1.76956
1.90567	1.90567
2.04178	2.04178
2.1779	2.1779
2.31401	2.31401
2.45012	2.45012
2.58623	2.58623
2.72235	2.72235
2.85846	2.85846
2.99457	2.99457
3.13069	3.13069
3.2668	3.2668
3.40291	3.40291
3.53903	3.53903
3.67514	3.67514
3.81125	3.81125
3.94736	3.94736
4.08348	4.08348
4.21959	4.21959
4.3557	4.3557
4.49182	4.49182
4.62793	4.62793
4.76404	4.76404
4.90016	4.90016
5.03627	5.03627
5.17238	5.17238
5.30849	5.30849
5.44461	5.44461
5.58072	5.58072
5.71683	5.71683
5.85295	5.85295
5.98906	5.98906
6.12517	6.12517
6.26129	6.26129
6.3974	6.3974
6.53351	6.53351
6.66963	6.66963
6.80574	6.80574
6.94185	6.94185
7.07796	7.07796
7.21408	7.21408
7.35019	7.35019
7.4863	7.4863
7.62242	7.62242
7.75853	7.75853
7.89464	7.89464
8.03076	8.03076
8.16687	8.16687
8.30298	8.30298
8.43909	8.43909
8.57521	8.57521
8.71132	8.71132
8.84743	8.84743
8.98355	8.98355
9.11966	9.11966
9.25577	9.25577
9.39189	9.39189
9.528	9.528
9.66411	9.66411
9.80022	9.80022
9.93634	9.93634
10.0725	10.0725
10.2086	10.2086
10.3447	10.3447
10.4808	10.4808
10.6169	10.6169
10.753	10.753
10.8891	10.8891
11.0252	11.0252
11.1614	11.1614
11.2975	11.2975
11.4336	11.4336
11.5697	11.5697
11.7058	11.7058
	11.8419
	11.978
	12.1141
	12.2503
	12.3864
	12.5225
	12.6586
	12.7947
	12.9308
	13.0669
	13.2031
	13.3392
	13.4753
	13.6114
	13.7475
	13.8836
	14.0197
	14.1558
	14.292
	14.4281
	14.5642
	14.7003
	14.8364
	14.9725
	15.1086
	15.2447
	15.3809
	15.517
	15.6531
	15.7892
	15.9253
	16.0614
	16.1975
	16.3337
	16.4698
	16.6059
	16.742
	16.8781
	17.0142
	17.1503
	17.2864
	17.4226
	17.5587
	17.6948
	17.8309
	17.967
	18.1031
	18.2392
	18.3753
	18.5115
	18.6476
	18.7837
	18.9198
	19.0559
	19.192
	19.3281
	19.4643
	19.6004
	19.7365
	19.8726
	20.0087
	20.1448
	20.2809
	20.417
	20.5532
	20.6893
	20.8254
	20.9615
	21.0976
	21.2337
	21.3698
	21.5059
	21.6421
	21.7782
	21.9143
	22.0504
	22.1865
	22.3226
	22.4587
	22.5948
	22.731
	22.8671
	23.0032
	23.1393
	23.2754
	23.4115
	23.5476
	23.6838
	23.8199
	23.956
	24.0921
	24.2282
	24.3643
	24.5004
	24.6365
	24.7727
	24.9088
	25.0449
	25.181
	25.3171
	25.4532
	25.5893
	25.7254
	25.8616
	25.9977
	26.1338
	26.2699
	26.406
	26.5421
	26.6782
	26.8144
	26.9505
	27.0866
	27.2227
	27.3588
	27.4949
	27.631
	27.7671
	27.9033
	28.0394
	28.1755
	28.3116
	28.4477
	28.5838
	28.7199
	28.856
	28.9922
	29.1283
	29.2644
	29.4005
	29.5366
	29.6727
	29.8088
	29.945
	30.0811
	30.2172
	30.3533
	30.4894
	30.6255
	30.7616
	30.8977
	31.0339
	31.17
	31.3061
	31.4422
	31.5783
	31.7144
	31.8505
	31.9866
	32.1228
	32.2589
	32.395
	32.5311
	32.6672
	32.8033
	32.9394
	33.0756
	33.2117
	33.3478
	33.4839
	33.62
	33.7561
	33.8922
	34.0283
	34.1645
	34.3006
	34.4367
	34.5728
	34.7089
	34.845
	34.9811
	35.1172
	35.2534
	35.3895
	35.5256
	35.6617
	35.7978
	35.9339
	36.07
	36.2062
	36.3423
	36.4784
	36.6145
	36.7506
	36.8867
	37.0228
	37.1589
	37.2951
	37.4312
	37.5673
	37.7034
	37.8395
	37.9756
	38.1117
	38.2478
	38.384
	38.5201
	38.6562
	38.7923
	38.9284
	39.0645
	39.2006
	39.3368
	39.4729
	39.609
	39.7451
	39.8812
	40.0173
	40.1534
	40.2895
	40.4257
	40.5618
	40.6979
	40.834
	40.9701
	41.1062
	41.2423
	41.3784
	41.5146
	41.6507
	41.7868
	41.9229
	42.059
	42.1951
	42.3312
	42.4674
	42.6035
	42.7396
	42.8757
	43.0118
	43.1479
	43.284
	43.4201
	43.5563
	43.6924
	43.8285
	43.9646
	44.1007
	44.2368
	44.3729
	44.509
	44.6452
	44.7813
	44.9174
	45.0535
	45.1896
	45.3257
	45.4618
	45.598
	45.7341
	45.8702
	46.0063
	46.1424
	46.2785
	46.4146
	46.5507
	46.6869
	46.823
	46.9591
	47.0952
	47.2313
	47.3674
	47.5035
	47.6396
	47.7758
	47.9119
	48.048
	48.1841
	48.3202
	48.4563
	48.5924
	48.7286
	48.8647
	49.0008
	49.1369
	49.273
	49.4091
	49.5452
	49.6813
	49.8175
	49.9536
	50.0897
	50.2258
	50.3619
	50.498
	50.6341
	50.7702
	50.9064
	51.0425
	51.1786
	51.3147
	51.4508
	51.5869
	51.723
	51.8592
	51.9953
	52.1314
	52.2675
	52.4036
	52.5397
	52.6758
	52.8119
	52.9481
	53.0842
	53.2203
	53.3564
	53.4925
	53.6286
	53.7647
	53.9008
	54.037
	54.1731
	54.3092
	54.4453
	54.5814
	54.7175
	54.8536
	54.9898
	55.1259
	55.262
	55.3981
	55.5342
	55.6703
	55.8064
	55.9425
	56.0787
	56.2148
	56.3509
	56.487
	56.6231
	56.7592
	56.8953
	57.0314
	57.1676
	57.3037
	57.4398
	57.5759
	57.712
	57.8481
	57.9842
	58.1204
	58.2565
	58.3926
	58.5287
	58.6648
	58.8009
	58.937
	59.0731
	59.2093
	59.3454
	59.4815
	59.6176
	59.7537
	59.8898
	60.0259
	60.162
	60.2982
	60.4343
	60.5704
	60.7065
	60.8426
	60.9787
	61.1148
	61.251
	61.3871
	61.5232
	61.6593
	61.7954
	61.9315
	62.0676
	62.2037
	62.3399
	62.476
	62.6121
	62.7482
	62.8843
	63.0204
	63.1565
	63.2926
	63.4288
	63.5649
	63.701
	63.8371
	63.9732
	64.1093
	64.2454
	64.3816
	64.5177
	64.6538
	64.7899
	64.926
	65.0621
	65.1982
	65.3343
	65.4705
	65.6066
	65.7427
	65.8788
	66.0149
	66.151
	66.2871
	66.4232
	66.5594
	66.6955
	66.8316
	66.9677
	67.1038
	67.2399
	67.376
	67.5122
	67.6483
	67.7844
	67.9205
	68.0566
	68.1927
	68.3288
	68.4649
	68.6011
	68.7372
	68.8733
	69.0094
	69.1455
	69.2816
	69.4177
	69.5538
	69.69
	69.8261
	69.9622
	70.0983
	70.2344
	70.3705
	70.5066
	70.6427
	70.7789
	70.915
	71.0511
	71.1872
	71.3233
	71.4594
	71.5955
	71.7317
	71.8678
	72.0039
	72.14
	72.2761
	72.4122
	72.5483
	72.6844
	72.8206
	72.9567
	73.0928
	73.2289
	73.365
	73.5011
	73.6372
	73.7733
	73.9095
	74.0456
	74.1817
	74.3178
	74.4539
	74.59
	74.7261
	74.8623
	74.9984
	75.1345
	75.2706
	75.4067
	75.5428
	75.6789
	75.815
	75.9512
	76.0873
	76.2234
	76.3595
	76.4956
	76.6317
	76.7678
	76.9039
	77.0401
	77.1762
	77.3123
	77.4484
	77.5845
	77.7206
	77.8567
	77.9929
	78.129
	78.2651
	78.4012
	78.5373
	78.6734
	78.8095
	78.9456
	79.0818
	79.2179
	79.354
	79.4901
	79.6262
	79.7623
	79.8984
	80.0345
	80.1707
	80.3068
	80.4429
	80.579
	80.7151
	80.8512
	80.9873
	81.1235
	81.2596
	81.3957
	81.5318
	81.6679
	81.804
	81.9401
	82.0762
	82.2124
	82.3485
	82.4846
	82.6207
	82.7568
	82.8929
	83.029
	83.1651
	83.3013
	83.4374
	83.5735
	83.7096
	83.8457
	83.9818
	84.1179
	84.2541
	84.3902
	84.5263
	84.6624
	84.7985
	84.9346
	85.0707
	85.2068
	85.343
	85.4791
	85.6152
	85.7513
	85.8874
	86.0235
	86.1596
	86.2957
	86.4319
	86.568
	86.7041
	86.8402
	86.9763
	87.1124
	87.2485
	87.3847
	87.5208
	87.6569
	87.793
	87.9291
	88.0652
	88.2013
	88.3374
	88.4736
	88.6097
	88.7458
	88.8819
	89.018
	89.1541
	89.2902
	89.4263
	89.5625
	89.6986
	89.8347
	89.9708
	90.1069
	90.243
	90.3791
	90.5153
	90.6514
	90.7875
	90.9236
	91.0597
	91.1958
	91.3319
	91.468
	91.6042
	91.7403
	91.8764
	92.0125
	92.1486
	92.2847
	92.4208
	92.5569
	92.6931
	92.8292
	92.9653
	93.1014
	93.2375
	93.3736
	93.5097
	93.6459
	93.782
	93.9181
	94.0542
	94.1903
	94.3264
	94.4625
	94.5986
	94.7348
	94.8709
	95.007
	95.1431
	95.2792
	95.4153
	95.5514
	95.6875
	95.8237
	95.9598
	96.0959
	96.232
	96.3681
	96.5042
	96.6403
	96.7765
	96.9126
	97.0487
	97.1848
	97.3209
	97.457
	97.5931
	97.7292
	97.8654
	98.0015
	98.1376
	98.2737
	98.4098
	98.5459
	98.682
	98.8181
	98.9543
	99.0904
	99.2265
	99.3626
	99.4987
	99.6348
	99.7709
	99.9071

[truncated: 7 more sheets: One sim - Mean mem vel, One sim - SD mem vel, One sim - Time(s) - Mem vel, One sim - Mean mem pos, One sim - SD mem pos, One sim - Time(s) - Mem pos, Time to collapse (s)]
