# Supplementary material for: Leading edge maintenance in migrating cells is an emergent property of branched actin network growth
Source: eLife journal article supplement (doi:10.7554/elife.74389), 2022-03-10
Supplement: fig5-data1 [file Figure 5-Source Data 2_BranchVar0.xlsx]

## Sheet: All acorr - Condition name
BranchAngleNoBranchVar = 15	BranchAngleNoBranchVar = 35	BranchAngleNoBranchVar = 70	BranchAngleNoBranchVar = 90	BranchAngleNoBranchVar = 140

## Sheet: All acorr - Freq (per um)
0.05	0.05	0.05	0.05	0.05
0.1	0.1	0.1	0.1	0.1
0.15	0.15	0.15	0.15	0.15
0.2	0.2	0.2	0.2	0.2
0.25	0.25	0.25	0.25	0.25
0.3	0.3	0.3	0.3	0.3
0.35	0.35	0.35	0.35	0.35
0.4	0.4	0.4	0.4	0.4
0.45	0.45	0.45	0.45	0.45
0.5	0.5	0.5	0.5	0.5
0.55	0.55	0.55	0.55	0.55
0.6	0.6	0.6	0.6	0.6
0.65	0.65	0.65	0.65	0.65
0.7	0.7	0.7	0.7	0.7
0.75	0.75	0.75	0.75	0.75
0.8	0.8	0.8	0.8	0.8
0.85	0.85	0.85	0.85	0.85
0.9	0.9	0.9	0.9	0.9
0.95	0.95	0.95	0.95	0.95
1	1	1	1	1
1.05	1.05	1.05	1.05	1.05
1.1	1.1	1.1	1.1	1.1
1.15	1.15	1.15	1.15	1.15
1.2	1.2	1.2	1.2	1.2
1.25	1.25	1.25	1.25	1.25
1.3	1.3	1.3	1.3	1.3
1.35	1.35	1.35	1.35	1.35
1.4	1.4	1.4	1.4	1.4
1.45	1.45	1.45	1.45	1.45
1.5	1.5	1.5	1.5	1.5
1.55	1.55	1.55	1.55	1.55
1.6	1.6	1.6	1.6	1.6
1.65	1.65	1.65	1.65	1.65
1.7	1.7	1.7	1.7	1.7
1.75	1.75	1.75	1.75	1.75
1.8	1.8	1.8	1.8	1.8
1.85	1.85	1.85	1.85	1.85
1.9	1.9	1.9	1.9	1.9
1.95	1.95	1.95	1.95	1.95
2	2	2	2	2
2.05	2.05	2.05	2.05	2.05
2.1	2.1	2.1	2.1	2.1
2.15	2.15	2.15	2.15	2.15
2.2	2.2	2.2	2.2	2.2
2.25	2.25	2.25	2.25	2.25
2.3	2.3	2.3	2.3	2.3
2.35	2.35	2.35	2.35	2.35
2.4	2.4	2.4	2.4	2.4
2.45	2.45	2.45	2.45	2.45
2.5	2.5	2.5	2.5	2.5
2.55	2.55	2.55	2.55	2.55
2.6	2.6	2.6	2.6	2.6
2.65	2.65	2.65	2.65	2.65
2.7	2.7	2.7	2.7	2.7
2.75	2.75	2.75	2.75	2.75
2.8	2.8	2.8	2.8	2.8
2.85	2.85	2.85	2.85	2.85
2.9	2.9	2.9	2.9	2.9
2.95	2.95	2.95	2.95	2.95
3	3	3	3	3
3.05	3.05	3.05	3.05	3.05
3.1	3.1	3.1	3.1	3.1
3.15	3.15	3.15	3.15	3.15
3.2	3.2	3.2	3.2	3.2
3.25	3.25	3.25	3.25	3.25

## Sheet: All acorr - Med amp (nm^3)
1.20935e+06	3.1075e+06	831223	3.2718e+06	2.05694e+07
2.31894e+06	4.09995e+06	1.16597e+06	3.91066e+06	8.55382e+06
980143	1.08604e+06	2.02393e+06	3.78859e+06	4.00538e+06
552713	1.58917e+06	1.68475e+06	1.8465e+06	3.20677e+06
668020	1.91722e+06	704596	1.72049e+06	2.80418e+06
551892	636055	654974	846341	1.71078e+06
416721	570618	356847	721914	1.04869e+06
261859	590543	268764	478161	906305
175369	533865	256538	515028	668179
122611	290347	139137	413315	454337
147215	183810	173465	268400	461849
91089.5	183272	148592	221653	311103
86792.1	137568	76369.4	159418	261086
86132.9	133230	70920.7	146898	221700
65145.5	115041	53754.1	116056	174270
52503.8	95244.6	49469	95352.4	182505
44754.6	62577.5	40942.9	85118.4	125493
39316.9	49280.9	41165.6	50333.7	104293
40157.7	42593	36725.8	50039.1	96259.4
31973.4	40234.5	26895.4	45567.1	72921.7
29881.9	30981.3	24861.4	34481.2	59524.3
22193.7	30744.2	17330.2	28229.1	50170.4
19024.9	27998.5	16096.7	24901.5	44617.9
18779.3	22904.6	12751.4	19991.2	40930.7
14927.2	16299.9	11756.5	16746	29934.8
12439	14707	8892.04	13669.6	25228.9
9657.96	12927.1	8546.73	12044.1	24428.9
8890.4	11101.2	7343.22	10358.8	20519
8713.01	9408.96	6002.94	9066.51	17319.1
7163.48	8561.16	4770.55	7426.41	15745.6
5673.01	7353.88	4457.22	6462.83	12969.5
6227.37	5896.69	3598.06	5856.23	10827
4771.34	5091.37	3244.66	4677.74	9667.1
4276.41	4291.75	2878.99	3982.33	8333.21
3605.81	3509.3	2386.2	3454.24	6934.84
3341.24	3282.26	2206.99	3129.84	5886.07
2576.38	2698.93	2052.12	2594.02	5304.14
2403.67	2632.09	1670.98	2177.85	4637.26
2030.14	2322.02	1499.79	1954.08	3852.89
1890.18	1873.94	1258.25	1785.95	3271.76
1863.82	1684.45	1105.29	1511.44	2890.99
1545.03	1429.84	1013.89	1405.48	2664.32
1264.84	1218.15	899.361	1232.66	2209.92
1130.33	1136.53	791.862	995.128	1929.52
1067.96	1059.58	689.482	893.965	1872.95
869.825	895.916	607.953	794.724	1578.75
752.436	721.93	529.016	702.706	1386.66
675.053	743.999	482.669	607.721	1103.07
575.964	577.692	449.831	575.689	1057.36
577.428	548.679	377.963	469.165	952.836
515.773	501.274	356.661	463.778	835.502
453.662	438.587	321.962	391.208	719.848
411.976	388.134	273.772	365.024	612.028
359.207	366.296	247.598	296.468	569.688
335.772	325.066	232.911	273.237	513.092
299.103	295.283	203.215	261.592	459.162
261.476	263.267	188.421	227.192	405.085
232.879	242.478	168.087	206.079	373.798
213.913	221.079	148.785	190.039	321.07
202.944	193.238	133.705	168.335	299.247
178.912	191.349	124.675	156.322	252.099
161.562	171.838	114.24	136.8	239.492
155.046	158.205	105.341	120.153	218.772
134.788	145.274	92.4278	114.404	193.527
129.427	134.173	88.393	109.444	185.19

## Sheet: All acorr - SE amp (nm^3)
223419	1.20788e+06	582004	445309	4.36911e+06
747086	624540	358990	1.12708e+06	1.0567e+06
288629	1.02349e+06	399590	366833	485364
44762.8	451673	442002	317485	700927
79404.7	299501	187128	504105	490000
140498	195470	80531.6	359540	208653
61266.7	8042.74	105859	134516	85360.7
41177.3	97901.5	54603.4	57596.2	114519
31327	60864.2	40716.7	107295	23014.4
10440.8	31564.1	23241.6	40297.9	11936.1
13264.2	25720.9	21442.4	33980.5	37801.5
12155	33076.7	9687.06	18692.8	16445.4
8900.95	13603.3	13103.6	31704	4544.92
10552.9	21010.4	4169.12	17774	6787.49
4723.6	7642.61	1069.34	15021.7	14490.8
3565.32	7759.95	6655.47	1682.3	7527.21
4412.79	4381.67	4039.24	9374.25	4250.94
3954.81	1626.11	2792.46	7487.85	4915.56
1531.49	2941.91	1423.92	3207.57	5764.18
2187.82	2613.23	1062.04	3832.84	2528.55
2152.24	858.464	1695.69	1238.62	2181.95
443.686	1002.9	893.04	1932.08	3336.23
1962.54	2138.05	329.574	2447.84	1740.25
950.938	1695.08	402.855	1528	1087.57
1075.74	560.196	527.633	767.715	1104.3
611.165	486.222	397.065	1117.52	174.013
391.874	844.784	450.733	1229.9	1631.45
363.15	949.962	270.66	955.45	989.008
447.148	475.201	323.148	426.752	108.545
413.585	69.3496	258.99	333.841	383.439
205.369	346.422	254.731	564.321	484.193
62.2126	106.874	119.513	318.798	156.316
299.689	73.5284	62.7494	308.834	310.331
140.943	202.147	102.985	176.098	318.412
233.733	23.6716	21.1085	241.327	210.512
111.449	138.782	84.4569	76.6982	180.234
116.034	73.103	95.3084	173.238	63.455
85.9914	76.7395	52.8826	144.325	90.8676
97.5883	28.2668	38.3956	31.5914	74.888
71.2886	91.5196	58.9737	119.701	142.048
35.0466	63.3296	22.2371	37.0021	90.3349
71.6464	81.0211	14.4463	40.1802	110.462
42.2552	29.0044	30.2703	37.9915	58.0442
53.9608	45.8007	13.0642	30.848	47.3827
49.903	47.4352	21.6015	33.9983	84.3081
46.5693	31.29	10.3403	32.0428	18.1868
23.0855	14.3122	8.49795	39.9121	33.2849
6.98597	30.2809	3.24314	22.8509	30.4266
11.9033	24.9406	8.20852	42.8762	9.34522
10.2317	18.1488	9.09275	26.9135	24.5936
12.9687	17.4777	7.19747	39.2056	22.9432
11.6919	16.2932	0.990034	18.9963	12.4216
10.983	9.24258	5.51082	14.604	10.7998
4.39878	7.88618	3.85525	8.58199	27.8323
2.15197	10.3122	3.73001	13.4656	13.4813
5.72767	5.42485	3.75911	1.69438	12.7502
6.44572	4.57848	3.90348	11.2423	8.86353
1.59649	0.648819	1.91413	10.5875	7.62772
3.41538	7.63778	2.99037	10.6581	6.50264
3.18409	4.60423	3.24894	6.40458	8.84352
4.55615	4.64587	1.8852	6.97951	5.11
3.19151	3.90365	2.11408	7.39724	6.98774
3.44154	3.17754	1.4215	4.59692	5.20577
4.51743	4.54194	2.21574	3.15376	4.56389
1.21596	1.54068	0.526753	5.90823	6.69459

## Sheet: All acorr - SD amp (nm^3)
499581	2.7009e+06	1.3014e+06	890618	9.76963e+06
1.82998e+06	1.39651e+06	802725	2.76076e+06	2.58837e+06
645394	2.2886e+06	893510	820264	1.18889e+06
100093	1.00997e+06	1.08268e+06	709919	1.71691e+06
194501	733626	458367	1.2348e+06	1.20025e+06
344148	478802	197261	803955	511093
150072	17984.1	259300	329497	209090
100863	239809	133750	128789	280513
76735.1	149086	99735.2	262818	51461.7
25574.7	77316	51969.9	98709.3	26690
29659.6	63003	52523	75982.8	92594.3
27179.5	81021	23728.3	41798.4	40282.9
21802.8	30417.9	32097	77658.5	9089.85
25849.2	51464.7	10212.2	43537.2	16625.9
11570.4	18720.5	2138.68	36795.5	35495
7972.29	19007.9	16302.5	3364.61	18437.8
10809.1	10732.9	9894.07	22962.1	10412.6
9687.26	3636.08	6840.1	16743.3	12040.6
3424.52	6578.3	3183.97	7172.35	14119.3
5359.03	6401.09	2374.8	9388.49	6193.65
5271.9	1716.93	4153.59	2769.64	5344.67
1086.8	2242.56	2187.49	4732.6	8172.05
4807.21	5237.12	736.951	5995.97	4262.74
2329.31	4152.08	986.789	3742.82	2431.89
2635.01	1252.64	1292.43	1880.51	2704.97
1497.04	1191	972.606	2737.36	348.025
959.89	2069.29	1104.07	3012.64	3996.21
889.532	2326.92	662.978	2340.37	2422.56
1095.28	1164	791.548	1045.32	217.09
1013.07	169.871	634.395	817.74	939.231
503.05	848.556	623.961	1382.3	1186.03
124.425	238.979	267.24	780.894	312.632
734.085	164.414	140.312	756.486	760.152
345.24	495.158	252.26	393.767	779.948
572.526	47.3432	42.2169	591.128	515.646
272.992	339.944	206.876	153.396	441.48
284.223	163.463	233.457	424.344	141.89
192.283	187.973	129.535	353.523	222.579
239.041	69.2393	94.0495	70.6406	183.437
174.621	224.176	144.455	293.206	347.944
78.3665	155.125	49.7237	82.7391	221.274
175.497	198.46	35.3861	98.421	270.576
103.504	71.046	74.1469	93.0597	142.179
132.177	112.188	32.0007	68.9783	116.063
122.237	116.192	52.9127	83.2785	206.512
114.071	76.6445	25.3284	78.4886	36.3737
56.5476	32.0031	19.002	97.7643	81.531
15.6211	74.1727	7.25189	55.973	74.5296
29.1571	61.0917	20.1067	105.025	22.891
25.0624	44.4553	22.2726	65.9244	60.2418
31.7668	42.8115	17.6301	96.0336	56.1991
28.6391	39.9101	1.98007	42.477	30.4265
26.9028	22.6396	13.4987	35.7722	26.4539
8.79756	19.3171	9.4434	19.1899	68.1749
4.81196	25.2596	9.13662	32.9837	33.0224
14.0299	13.2881	9.20789	3.38875	31.2315
14.4131	11.2149	9.56153	27.5379	21.7111
3.56986	1.29764	4.68863	25.9339	18.684
8.36595	18.7087	7.32489	26.107	15.9282
7.7994	11.278	7.95824	15.6879	21.6621
11.1602	11.38	4.61777	17.0962	12.5169
7.81756	9.56194	5.17843	18.1195	17.1164
8.43002	7.78334	3.48195	10.279	12.7515
11.0654	11.1254	5.42743	7.05203	11.1792
2.71898	3.44505	1.29028	14.4722	16.3983

## Sheet: All acorr - Med rate (per ms)
0.0247546	0.0179602	0.00929037	0.00648904	0.00212046
9.81349e-06	0.0190773	0.0109896	0.00680029	0.00176521
6.16065e-06	0.0188451	0.0112172	0.00754391	0.00248822
4.49927e-05	0.0240499	0.0131788	0.00583531	0.00263321
1.01263e-05	0.0229277	0.0157991	0.006962	0.00355631
4.61454e-05	9.81363e-06	0.0144366	0.0110426	0.00289797
2.58751e-06	2.38086e-05	0.0159583	0.00961674	0.00325527
4.61615e-05	1.12991e-06	0.016303	0.011161	0.00374307
3.34465e-05	2.31421e-05	0.0175665	0.0123365	0.00390513
1.68796e-05	2.13961e-05	0.0182059	0.0143587	0.0037949
4.64077e-05	4.45918e-06	0.0203933	0.0169074	0.00398894
4.36773e-05	2.2439e-05	0.0235553	0.0159773	0.0046102
0.000102587	2.44466e-05	9.81841e-06	0.017611	0.00491054
7.96347e-05	7.54458e-05	6.60431e-06	0.0176812	0.00553169
0.000107755	5.62773e-05	2.95579e-05	0.0185769	0.00552145
0.000119397	5.08414e-05	3.08187e-05	0.0214814	0.00587871
0.00012278	9.08704e-05	5.78186e-05	9.8101e-06	0.00683957
0.000198944	0.000107242	3.48193e-05	1.65081e-05	0.00762337
0.000207946	0.000212238	2.34991e-05	3.03041e-05	0.00853492
0.000190228	0.00016418	2.35745e-05	4.47412e-05	0.00965939
0.000376812	0.000171383	6.56336e-05	3.02293e-05	0.00809759
0.000283735	0.000154089	0.000119754	5.29924e-05	0.0118156
0.000247874	0.000166194	6.46753e-05	4.05562e-06	0.0112128
0.000282603	0.000282429	0.000145467	5.93871e-05	0.0107903
0.000353696	0.000354715	9.2135e-05	7.30577e-05	0.0129382
0.000529478	0.000295022	0.000183135	3.28944e-05	0.0153751
0.000415409	0.00036028	0.000160066	7.27991e-05	9.81571e-06
0.00056898	0.000317432	0.000175365	6.01778e-05	3.62372e-05
0.000599154	0.000390649	0.000184821	7.84515e-05	8.57798e-06
0.00064282	0.000495063	0.000245822	0.000103088	8.46042e-06
0.000648653	0.00051865	0.000234957	0.000163558	1.19281e-06
0.00068386	0.000527903	0.000320265	0.000202025	2.62955e-05
0.00064787	0.000854762	0.00033371	0.000232965	1.45377e-05
0.000774491	0.000677766	0.000451479	0.000220847	3.886e-05
0.000944327	0.000504855	0.000415634	0.000353836	6.79372e-05
0.00112253	0.000852463	0.000321103	0.000272544	7.40909e-05
0.00130456	0.000554696	0.000498566	0.000291909	5.42572e-05
0.0011717	0.00091214	0.000598244	0.000286958	0.000116231
0.00129612	0.000944081	0.000594619	0.00043689	0.000145226
0.00184301	0.00123342	0.000629808	0.000388451	0.000128004
0.0015549	0.000938689	0.000643643	0.000509672	0.000203713
0.00191441	0.00134555	0.000638517	0.000608628	0.000241571
0.00196842	0.00155011	0.000906908	0.00064195	0.000183997
0.00179398	0.00165897	0.0011086	0.0007045	0.000202175
0.00258247	0.00176404	0.00101674	0.00060426	0.000364361
0.00295383	0.00176296	0.0010889	0.000872023	0.00040385
0.00236801	0.00218009	0.00121843	0.000933852	0.000331223
0.00398817	0.00207583	0.00143139	0.000887369	0.000573017
0.00319168	0.00278147	0.00133526	0.00126057	0.000381586
0.00491862	0.00231632	0.00132942	0.000888533	0.000624293
0.00534519	0.00274691	0.0017883	0.00112669	0.000533738
0.00402045	0.00400388	0.00142354	0.00147668	0.00068109
0.00604547	0.0037521	0.00157487	0.00134228	0.000785232
0.00734838	0.00291633	0.00178674	0.00175919	0.000892472
0.00538165	0.00447835	0.00201355	0.00176224	0.000832221
0.00887076	0.00509461	0.00196813	0.00202457	0.000765817
0.0113895	0.00592039	0.00238749	0.00205828	0.000787071
0.0116387	0.00755268	0.00358182	0.00204612	0.000941605
0.0130361	0.0081075	0.00306333	0.00249498	0.001319
0.0122189	0.00751098	0.00388718	0.00253243	0.00111553
0.0135615	0.010834	0.00387071	0.00256094	0.00115776
0.0131338	0.0103256	0.00487978	0.00303729	0.00131975
0.0193653	0.00967109	0.00594478	0.00473898	0.00156482
0.01994	0.0118364	0.00575705	0.00489302	0.00142115
0.0211245	0.0149176	0.00588389	0.00418046	0.00149382

## Sheet: All acorr - SE rate (per ms
7.57808e-06	1.96597e-06	6.02881e-06	9.55719e-07	3.13293e-06
4.76032e-06	5.40162e-07	7.33365e-06	4.82481e-06	2.83614e-06
5.33109e-06	3.66868e-06	7.12537e-07	3.04539e-06	5.43679e-06
1.73662e-06	3.51287e-06	3.09806e-06	5.78348e-06	9.81693e-06
3.39426e-06	2.20583e-06	5.8621e-06	4.78227e-06	1.0527e-05
5.48687e-06	3.25806e-06	3.74477e-06	6.83639e-06	2.67588e-06
1.22096e-05	5.38398e-06	1.7841e-05	5.53974e-06	1.88881e-06
1.78446e-05	8.76117e-06	1.08604e-05	8.85411e-06	4.86969e-06
9.17826e-06	5.21121e-06	1.35524e-05	3.66056e-06	6.14659e-06
1.19297e-05	5.17017e-06	2.24949e-05	7.75594e-06	8.17749e-06
1.53952e-05	1.01401e-05	1.56476e-05	1.28129e-05	8.35116e-06
1.21992e-05	9.88142e-06	7.47227e-06	6.58598e-06	9.46507e-06
5.70973e-06	2.05455e-05	1.3428e-05	1.77442e-05	9.37491e-06
2.03308e-05	7.42575e-06	1.99697e-05	5.85568e-06	1.08453e-05
1.80899e-05	2.22864e-05	1.98638e-05	6.35733e-06	1.15114e-05
1.61291e-05	1.81709e-05	1.93935e-05	1.015e-05	7.59971e-06
1.83381e-05	9.82806e-06	1.31025e-05	3.04529e-05	7.48405e-06
1.40603e-05	2.14676e-05	1.77511e-05	1.43776e-05	4.01721e-06
6.25652e-06	1.57394e-05	2.32262e-05	2.23421e-05	8.82868e-06
2.24365e-05	2.29466e-05	2.09357e-05	4.01946e-06	9.76438e-06
1.62591e-05	1.85385e-05	3.03716e-05	1.74836e-05	1.6812e-05
2.9178e-05	2.15503e-05	1.83784e-05	2.50299e-05	2.33055e-05
1.43359e-05	2.64828e-05	1.51518e-05	2.07773e-05	2.18188e-05
2.8776e-05	3.58204e-05	2.82214e-05	1.4471e-05	2.35612e-05
3.73089e-06	1.38848e-05	3.77099e-05	2.03547e-05	4.99514e-06
1.79759e-05	3.80896e-05	5.0951e-05	3.5243e-05	5.99137e-06
2.9536e-05	3.44183e-05	2.36142e-05	4.20496e-05	1.69683e-05
2.64187e-05	3.51129e-05	5.37498e-05	8.84035e-06	1.60035e-05
1.84432e-05	2.27477e-05	5.48671e-05	1.65907e-05	1.82459e-05
2.09385e-05	4.09148e-05	4.52938e-05	4.79604e-05	2.02008e-05
4.15402e-05	3.1135e-05	7.06412e-05	3.7456e-05	2.88736e-05
4.31694e-05	1.80093e-05	3.59149e-05	7.98813e-06	1.64567e-05
3.25341e-05	5.08349e-05	4.99356e-05	5.35654e-05	9.28302e-06
5.36205e-05	3.97671e-05	7.67734e-05	4.51482e-05	2.58436e-05
4.44823e-05	5.98596e-05	2.67532e-05	3.22741e-05	3.52571e-05
5.67134e-05	5.85377e-05	9.61186e-05	0.000104313	1.20006e-05
7.08854e-05	5.59898e-05	5.78336e-05	7.54229e-05	1.5323e-05
7.95002e-05	9.14254e-06	5.18334e-05	7.43037e-05	3.0675e-06
6.27049e-05	0.000245959	0.000127869	0.000116056	1.88396e-05
2.27383e-05	4.3175e-05	9.74276e-05	2.10989e-05	4.91857e-05
9.14953e-05	0.000133551	4.3989e-05	7.01797e-05	5.18634e-05
0.000106796	0.000273041	0.00013649	0.000119615	6.23662e-06
0.000139977	0.000155949	6.42942e-05	5.15487e-05	2.52449e-05
0.000168583	0.000152969	0.000112754	0.000141196	7.32526e-05
0.000195173	0.000274571	0.000114545	0.00011072	2.60803e-05
0.000162518	7.96933e-05	0.000172029	0.000286444	2.72052e-05
0.00013371	0.000287928	0.000106948	2.03092e-05	0.000137934
0.000178475	0.000301241	7.24344e-05	6.72369e-05	8.59858e-05
0.000200858	0.000158752	0.000186163	0.000183461	0.000124804
0.00017087	0.000317284	0.000301329	0.000480912	0.000102966
0.000269709	0.000308924	0.000164557	0.000236908	2.68009e-05
0.000193053	0.000289307	0.00021681	9.55228e-05	0.000127521
0.000383954	0.000493982	0.000226061	0.000304152	0.000236477
0.000198181	0.000440443	0.000279359	0.000305351	7.17756e-05
0.000220751	0.000764113	0.00035342	0.000714452	0.000200081
0.000558232	0.000263553	0.000369132	0.000305233	0.000175717
0.000389707	0.000814636	0.000170712	0.000395694	0.000168326
0.000416018	0.000364956	0.000328182	0.000435174	7.64471e-05
0.000237882	0.0014306	0.000316634	0.000770751	0.000146882
0.000185144	0.00161026	0.000111277	0.000557497	0.000222723
0.000329893	0.00124359	0.000421403	0.000527201	0.000198967
0.00044419	0.00116808	0.000254985	0.000324065	0.000231933
0.000929929	0.00110189	0.000120665	0.000994617	0.000375214
0.00113037	0.000498887	0.000237453	0.000501266	0.000292871

## Sheet: All acorr - SD rate (per ms)
1.85624e-05	4.81562e-06	1.47675e-05	1.91144e-06	7.67409e-06
1.16603e-05	1.08032e-06	1.79637e-05	1.18183e-05	6.94709e-06
1.19207e-05	8.20341e-06	1.42507e-06	7.45964e-06	1.33174e-05
3.88319e-06	7.85502e-06	6.92746e-06	1.41666e-05	2.40465e-05
6.78852e-06	4.93239e-06	1.43592e-05	1.17141e-05	2.57859e-05
1.2269e-05	7.28525e-06	9.17277e-06	1.67457e-05	5.35175e-06
2.99073e-05	1.3188e-05	4.37012e-05	1.35695e-05	3.77761e-06
4.37101e-05	2.14604e-05	2.42846e-05	2.16881e-05	1.19283e-05
2.24821e-05	1.16526e-05	3.31964e-05	8.18526e-06	1.5056e-05
2.92218e-05	1.15608e-05	5.51011e-05	1.89981e-05	2.00307e-05
3.77105e-05	2.4838e-05	3.49892e-05	3.1385e-05	2.04561e-05
2.98818e-05	2.42044e-05	1.83033e-05	1.61323e-05	2.31846e-05
1.27673e-05	5.0326e-05	3.28917e-05	4.34641e-05	2.29637e-05
4.98e-05	1.81893e-05	4.89156e-05	1.17114e-05	2.65654e-05
4.43109e-05	5.45903e-05	4.44169e-05	1.42154e-05	2.81971e-05
3.95081e-05	4.45096e-05	4.75043e-05	2.48624e-05	1.86154e-05
4.49191e-05	2.40737e-05	3.20945e-05	7.4594e-05	1.83321e-05
3.44406e-05	5.25846e-05	3.96926e-05	3.21492e-05	8.98275e-06
1.2513e-05	3.85534e-05	5.68924e-05	5.47267e-05	1.97415e-05
5.49579e-05	5.62074e-05	4.68136e-05	8.03892e-06	2.39178e-05
3.98265e-05	4.54099e-05	7.43949e-05	4.28258e-05	4.11809e-05
7.14713e-05	5.27872e-05	4.10954e-05	6.13104e-05	5.70865e-05
3.51157e-05	6.48694e-05	3.71142e-05	4.64596e-05	5.34449e-05
7.04865e-05	8.77418e-05	6.9128e-05	3.54466e-05	5.7713e-05
8.34253e-06	3.40107e-05	9.23701e-05	4.98586e-05	1.11695e-05
4.40318e-05	9.33001e-05	0.000124804	8.63274e-05	1.46758e-05
7.2348e-05	8.43074e-05	5.78427e-05	0.000103	4.15636e-05
6.47122e-05	8.60086e-05	0.00013166	1.97676e-05	3.92003e-05
4.51763e-05	5.57202e-05	0.000134396	3.7098e-05	4.46933e-05
5.12886e-05	0.000100221	0.000110947	0.000117479	4.94817e-05
0.000101752	7.62648e-05	0.000173035	9.17481e-05	7.07255e-05
0.000105743	4.02699e-05	8.79732e-05	1.7862e-05	3.67982e-05
7.9692e-05	0.00012452	0.000122317	0.000131208	1.8566e-05
0.000131343	9.74092e-05	0.000188056	0.00011059	6.33037e-05
0.000108959	0.000146625	5.98219e-05	7.2167e-05	8.6362e-05
0.000138919	0.000143388	0.000235441	0.000255514	2.68342e-05
0.000173633	0.000137146	0.000141663	0.000184748	3.75335e-05
0.000194735	1.82851e-05	0.000126965	0.000182006	6.135e-06
0.000153595	0.000602473	0.000313214	0.000284278	3.76792e-05
5.08444e-05	9.65423e-05	0.000238648	4.21978e-05	0.00012048
0.000224117	0.000327131	0.000107751	0.000171904	0.000127039
0.000261595	0.000668811	0.00033433	0.000292995	1.24732e-05
0.000342873	0.000381995	0.000157488	0.000115267	5.64492e-05
0.000412941	0.000374695	0.00027619	0.000345859	0.000179431
0.000478075	0.00067256	0.000280576	0.000247578	5.21605e-05
0.000398086	0.000159387	0.000421383	0.000701642	6.08326e-05
0.000327521	0.000643827	0.000261968	4.54127e-05	0.000337869
0.000437172	0.000737886	0.000177427	0.000134474	0.000210621
0.000491999	0.00035498	0.000456005	0.000449385	0.000305705
0.000418545	0.000777185	0.000738102	0.00117799	0.000252213
0.000603088	0.000756706	0.000403081	0.000529742	5.36019e-05
0.000472881	0.000646909	0.000531075	0.000191046	0.000312361
0.000940491	0.00121	0.000553734	0.000745016	0.000579248
0.000485443	0.00107886	0.000684286	0.000747955	0.000175814
0.000540727	0.00187169	0.000865699	0.00175004	0.000490096
0.00136738	0.000527107	0.000904186	0.000747666	0.000430418
0.000954582	0.00199544	0.000418158	0.000969249	0.000412314
0.00101903	0.000893957	0.000803878	0.000973079	0.000187256
0.000531921	0.00350424	0.000775592	0.00188795	0.000359787
0.000413995	0.00394432	0.000248823	0.00136558	0.000545557
0.00080807	0.00304617	0.00103222	0.00129137	0.000487367
0.00108804	0.00286119	0.000624582	0.000724631	0.000568117
0.00227785	0.00269907	0.000269816	0.0024363	0.000919084
0.00276883	0.00111555	0.000530961	0.00122785	0.000717384

## Sheet: Amp by angle - Freq (per um)
0.2	0.7	1.2	1.7	2.2	2.7	3.2

## Sheet: Amp by angle - Angle (degrees)
5
10
15
20
25
30
35
40
45
50
55
60
65
70
75
80
85
90
95
100
105
110
115
120
125
130
135
140
145
150
155
160
165
170

[truncated: 5 more sheets: Amp by angle - Med amp (nm^3), Amp by angle - SE amp (nm^3), FilDenSTD - Angle (degrees), FilDenSTD - FilDensSTD (per nm), FilDenSTD - SE (per nm)]
