# Supplementary material for: Leading edge maintenance in migrating cells is an emergent property of branched actin network growth
Source: eLife journal article supplement (doi:10.7554/elife.74389), 2022-03-10
Supplement: fig5-data1 [file Figure 5-Source Data 3_BranchVar2.xlsx]

## Sheet: All acorr - Condition name
BranchAngle2DegVar = 15	BranchAngle2DegVar = 35	BranchAngle2DegVar = 70	BranchAngle2DegVar = 90	BranchAngle2DegVar = 140

## Sheet: All acorr - Freq (per um)
0.05	0.05	0.05	0.05	0.05
0.1	0.1	0.1	0.1	0.1
0.15	0.15	0.15	0.15	0.15
0.2	0.2	0.2	0.2	0.2
0.25	0.25	0.25	0.25	0.25
0.3	0.3	0.3	0.3	0.3
0.35	0.35	0.35	0.35	0.35
0.4	0.4	0.4	0.4	0.4
0.45	0.45	0.45	0.45	0.45
0.5	0.5	0.5	0.5	0.5
0.55	0.55	0.55	0.55	0.55
0.6	0.6	0.6	0.6	0.6
0.65	0.65	0.65	0.65	0.65
0.7	0.7	0.7	0.7	0.7
0.75	0.75	0.75	0.75	0.75
0.8	0.8	0.8	0.8	0.8
0.85	0.85	0.85	0.85	0.85
0.9	0.9	0.9	0.9	0.9
0.95	0.95	0.95	0.95	0.95
1	1	1	1	1
1.05	1.05	1.05	1.05	1.05
1.1	1.1	1.1	1.1	1.1
1.15	1.15	1.15	1.15	1.15
1.2	1.2	1.2	1.2	1.2
1.25	1.25	1.25	1.25	1.25
1.3	1.3	1.3	1.3	1.3
1.35	1.35	1.35	1.35	1.35
1.4	1.4	1.4	1.4	1.4
1.45	1.45	1.45	1.45	1.45
1.5	1.5	1.5	1.5	1.5
1.55	1.55	1.55	1.55	1.55
1.6	1.6	1.6	1.6	1.6
1.65	1.65	1.65	1.65	1.65
1.7	1.7	1.7	1.7	1.7
1.75	1.75	1.75	1.75	1.75
1.8	1.8	1.8	1.8	1.8
1.85	1.85	1.85	1.85	1.85
1.9	1.9	1.9	1.9	1.9
1.95	1.95	1.95	1.95	1.95
2	2	2	2	2
2.05	2.05	2.05	2.05	2.05
2.1	2.1	2.1	2.1	2.1
2.15	2.15	2.15	2.15	2.15
2.2	2.2	2.2	2.2	2.2
2.25	2.25	2.25	2.25	2.25
2.3	2.3	2.3	2.3	2.3
2.35	2.35	2.35	2.35	2.35
2.4	2.4	2.4	2.4	2.4
2.45	2.45	2.45	2.45	2.45
2.5	2.5	2.5	2.5	2.5
2.55	2.55	2.55	2.55	2.55
2.6	2.6	2.6	2.6	2.6
2.65	2.65	2.65	2.65	2.65
2.7	2.7	2.7	2.7	2.7
2.75	2.75	2.75	2.75	2.75
2.8	2.8	2.8	2.8	2.8
2.85	2.85	2.85	2.85	2.85
2.9	2.9	2.9	2.9	2.9
2.95	2.95	2.95	2.95	2.95
3	3	3	3	3
3.05	3.05	3.05	3.05	3.05
3.1	3.1	3.1	3.1	3.1
3.15	3.15	3.15	3.15	3.15
3.2	3.2	3.2	3.2	3.2
3.25	3.25	3.25	3.25	3.25

## Sheet: All acorr - Med amp (nm^3)
2.54776e+06	3.99718e+06	2.15643e+06	2.29677e+06	7.58482e+06
858771	2.83843e+06	1.46389e+06	2.4585e+06	7.36335e+06
1.17917e+06	1.622e+06	1.27283e+06	3.4432e+06	3.94684e+06
541361	995575	562168	1.42695e+06	1.63801e+06
598061	2.75941e+06	790392	1.06563e+06	1.48307e+06
312159	584992	685612	562890	1.28892e+06
254993	635852	571085	655203	1.17342e+06
226804	399009	391982	308735	778074
244553	366494	466411	386677	560613
197278	339785	236789	258246	468777
101030	227436	195996	201663	401096
107096	184438	143441	130248	303551
118680	147879	130448	135866	273013
79218.9	123580	102191	110958	195237
59178.6	113512	66348.9	90522.1	181923
58586.7	94172.3	65864.2	80021.6	133010
46616.9	64767.1	45495.2	67524.2	108951
44572.8	50551.4	54165.9	40947.3	93056.4
41064.2	47775.5	36740.6	42961.1	82307.8
36559.2	41998.7	29102	31926.6	66846.7
25964.6	41881.2	28380	29476.1	56762.7
25329.5	26388.3	21177.3	23474.5	49968.2
18048.7	24021	19748.8	20680.6	41342.8
16085.4	19772.5	14857	16185.3	35409.7
15611.4	17029.7	13239.8	15330.7	29263
13248.9	14745.4	11226.7	11249.8	24553
10399.8	11782.5	9254.33	10831.6	20369
9790.26	10227.9	7148.91	8338.93	18542.2
7874.07	9171.85	7986.94	7693.24	15573
6833.37	8124.62	6424.91	6774.39	14544.9
6043.03	6320.09	4990.19	5665.59	10977.7
5136.16	5983.35	4751.08	5167.13	9798.83
5219.51	5231.91	4210.29	4668.78	9141.54
4198.3	4299.27	3129.98	3709.24	7633.83
3340.89	3701.01	2842.81	3198.79	6434.49
3123.72	3080.57	2407.44	2811.2	5514.9
2864.42	2598.43	2339.3	2396.82	4714.97
2478.16	2407.76	1978.98	2093.7	4356.78
2099.55	2136.42	1718.29	1727.79	3621.38
1848.96	1679.31	1555.51	1576.2	3532.01
1508.81	1578.45	1229.54	1457.96	2521.61
1438.42	1367.04	1119.79	1112.08	2283.65
1266.33	1171.1	982.549	1046.13	1930.17
1176.03	1177	921.647	857.881	1888.03
998.061	935.649	793.327	866.986	1547.39
898.937	842.571	693.122	711.687	1339.83
751.262	775.433	666.142	610.227	1234.51
674.111	636.11	562.856	574.195	1064.29
615.018	613.292	472.558	512.314	982.789
543.364	517.983	447.105	437.613	796.658
501.067	491.143	382.391	402.481	742.242
432.835	418.224	336.872	359.768	611.935
399.585	386.801	312.644	300.526	578.077
375.558	348.223	288.037	271.485	493.802
319.95	301.206	247.442	251.992	451.798
291.836	284.499	231.85	224.531	414.686
262.98	258.653	206.15	197.978	364.653
234.562	222.956	185.855	176.521	318.13
214.955	212.604	165.629	163.307	296.202
203.734	192.352	152.601	144.384	269.894
184.466	174.025	135.728	130.771	230.499
159.584	162.223	128.226	122.75	211.903
154.574	148.22	112.722	110.652	194.513
137.534	136.99	104.678	101.185	175.507
128.786	130.539	98.0166	92.8968	168.17

## Sheet: All acorr - SE amp (nm^3)
895637	1.47451e+06	848327	1.06737e+06	1.21363e+06
263188	873316	164407	234228	922157
259647	322889	298414	149018	856955
92290.8	458970	77226	258899	277482
212502	338068	314011	209048	176135
86739.9	50279.7	115245	108193	136076
46156	99000.7	102826	127321	112659
63541.6	78817.8	56245.1	26112.7	56515.2
34791	75266.9	67845.9	40901.2	52402.5
30201.3	52871.2	23846.7	36518.4	17344.4
1556.13	9007.33	24673.3	18783.6	18672.1
18588.3	13019.1	18105	16802.7	12742.7
5004.29	12532.6	18849.1	11201.1	23735.2
5009.41	4349.46	8892.06	9089.5	5232.22
2752.82	10666.3	6548.21	6478.05	9420.91
5387.43	2721.93	5166.21	2727.47	9118.55
2996.83	7090.29	997.504	5005.78	4640.9
6481.25	3765.02	1582.28	1076.84	3247.26
3296.26	3976.14	763.747	2555.25	4724.17
1510.93	2498.5	1573.18	1856.87	5027.44
994.389	637.404	1497.84	2213.13	2984.51
787.016	1089.39	279.389	702.356	1106.19
1419.17	1197.31	1688.96	1127.57	2326.67
952.897	1509.98	877.39	894.704	1780.57
790.002	722.7	231.63	1135.9	843.569
772.91	763.279	744.493	380.712	260.778
202.132	547.211	365.96	497.657	944.444
718.502	441.267	318.313	392.271	894.388
262.368	764.536	359.086	367.706	823.212
448.382	460.651	298.791	265.728	1001.42
477.525	328.246	154.269	128.968	648.442
106.507	269.654	208.324	110.002	270.306
27.6947	273.367	121.751	227.562	122.594
294.393	110.886	83.1473	221.716	106.645
46.2741	137.354	103.085	105.846	220.7
139.765	23.9818	27.0618	32.1287	93.436
123.884	157.688	19.8305	91.5572	178.072
67.529	126.239	107.155	95.8907	69.516
24.0725	110.387	28.0846	66.8467	104.619
78.9583	42.053	24.2303	21.4441	61.6988
30.5026	60.0517	27.9096	38.9789	161.742
73.765	55.2505	7.30185	63.4447	16.5361
57.0096	38.901	41.2407	15.9015	38.5516
61.4102	36.4817	16.0335	11.4665	57.1286
32.2438	32.7249	14.1926	43.9263	35.8554
32.6025	10.8076	19.2509	24.7804	46.1106
36.2819	19.5192	9.92427	15.8367	47.4802
6.60427	6.42718	18.3871	1.10506	33.087
24.4419	18.8925	3.87646	23.2378	3.49627
3.70548	2.67766	12.3806	10.2911	30.8871
8.55324	15.447	7.5048	8.36015	22.551
10.1356	11.9023	7.23003	10.009	8.42821
1.69028	0.496093	5.38694	3.729	10.8146
1.26575	7.67036	8.98802	6.03467	12.1929
6.28453	2.94121	2.56028	7.10863	8.66538
3.40876	3.30748	5.63769	2.6241	12.4703
2.47569	4.07087	2.83357	4.41403	12.3288
3.91109	6.78717	3.67598	1.06867	7.18373
3.2235	1.88088	2.79625	6.10883	12.5848
2.26605	5.03708	2.0221	2.75105	4.79121
6.20851	3.50081	2.02209	2.64895	0.648641
3.05253	1.94799	2.5506	3.60983	5.56581
4.35358	2.97708	2.7053	1.88713	4.04677
1.63876	2.29257	1.37269	1.92902	3.38736
2.7699	2.88653	1.73632	2.83182	3.61194

## Sheet: All acorr - SD amp (nm^3)
2.19385e+06	3.6118e+06	1.89692e+06	2.38671e+06	2.97278e+06
644677	2.13918e+06	402713	573739	2.25881e+06
636003	722002	730962	298035	2.0991e+06
206368	1.12424e+06	154452	634171	679689
520522	828093	702151	512061	431441
212468	112429	282291	265017	333318
113059	242501	251871	311871	275956
155644	193063	125768	58389.7	138433
85220.2	184366	166188	100187	128359
73977.7	129508	58412.2	89451.4	38783.3
3112.25	18014.7	55171.3	46010.3	45737.1
45531.9	31890.2	44348.1	41158.1	31213.1
11189.9	30698.4	46170.7	27437.1	58139.2
12270.5	9725.68	21781	22264.6	11699.6
6155.49	26127.1	14642.2	14485.4	23076.4
13196.4	6086.43	12654.6	6098.81	22335.8
7340.71	17367.6	1995.01	12261.6	11367.8
15875.8	9222.38	3538.08	2407.89	7954.12
8074.15	9739.51	1870.79	6259.06	11571.8
3701.01	5586.81	3853.5	4548.39	12314.7
2435.75	1425.28	3668.93	5421.04	7310.54
1927.79	2668.44	624.732	1720.41	2709.6
3476.24	2932.8	4137.08	2761.98	5699.16
2334.11	3698.68	2149.16	2191.57	4361.5
1935.1	1770.25	517.941	2782.37	2066.31
1893.23	1869.64	1823.63	932.551	521.556
451.982	1340.39	896.415	1219.01	2313.41
1759.96	1080.88	779.704	877.144	2190.79
586.673	1872.72	879.577	900.692	2016.45
1098.31	1128.36	731.886	650.898	2452.97
1169.69	804.036	344.955	315.906	1588.35
238.158	660.515	510.288	269.45	662.111
55.3894	669.611	298.229	557.412	300.293
721.113	271.613	203.669	543.092	238.465
103.472	336.446	252.505	236.679	540.602
342.353	47.9636	60.5121	71.8419	208.929
303.453	386.254	44.3424	224.268	436.185
165.411	309.222	262.474	234.883	155.442
58.9653	270.392	68.7929	163.74	256.262
193.408	103.008	59.3519	52.5271	137.963
68.206	147.096	62.4078	95.4785	396.186
180.687	135.336	14.6037	155.407	33.0722
139.644	86.9853	101.019	38.9505	77.1033
150.424	89.3617	39.2739	25.6399	139.936
78.9809	80.1594	34.7646	107.597	87.8276
79.8595	26.4731	47.1549	60.6994	112.947
88.8723	47.812	24.3094	38.7919	116.302
16.1771	14.3716	45.0391	2.21012	81.0462
59.8702	46.2771	8.66802	56.9206	6.99255
8.2857	5.35531	30.3262	25.2079	69.0656
20.9511	37.8373	18.3829	18.6939	55.2385
24.8272	29.1545	17.7099	24.5169	20.6448
3.38056	0.992186	13.1953	8.3383	26.4901
2.53151	18.7885	22.0161	13.4939	29.8663
15.3939	6.57675	5.72496	17.4125	21.2258
8.34972	8.10164	13.8095	6.42772	30.546
5.5358	9.97154	6.94081	10.8121	30.1994
9.58016	16.6251	9.00428	2.38962	17.5965
7.89592	4.60719	6.84937	14.9635	30.8264
5.55067	12.3383	4.9531	6.15154	11.736
15.2077	8.57519	4.9531	6.48858	1.29728
7.47715	4.35584	6.24768	8.84223	13.6334
10.6641	7.29233	6.62661	4.6225	9.91252
4.01412	5.61562	3.36239	4.72512	8.2973
6.78485	7.07052	4.2531	6.93651	8.84741

## Sheet: All acorr - Med rate (per ms)
0.0215812	0.0139496	0.00822806	0.00497072	0.00195494
0.0222309	0.013935	0.00838437	0.00550205	0.00188384
9.79344e-06	0.0150708	0.00724457	0.00627392	0.00224391
1.26583e-05	0.0197887	0.0117874	0.00704277	0.00191143
5.11422e-05	0.0203317	0.0116544	0.00774606	0.00198241
6.69642e-05	0.0216827	0.0143631	0.00889812	0.00212135
4.69019e-05	9.79783e-06	0.0128414	0.00943416	0.00277952
3.32802e-05	1.34471e-05	0.0149258	0.0106696	0.00238602
3.66385e-05	6.87756e-06	0.0159194	0.0120642	0.00272666
9.51109e-05	9.80812e-06	0.0176734	0.0125486	0.00301114
3.11726e-05	1.8685e-05	0.0164774	0.0147694	0.00354638
3.83932e-05	2.19984e-05	0.0209357	0.0168395	0.00426136
7.36028e-05	2.65812e-05	0.0204419	0.0154916	0.0041904
4.87432e-05	5.63886e-05	9.81157e-06	0.0185221	0.00597367
0.00014951	0.000102777	8.59775e-06	0.0176545	0.00532598
0.000109904	4.68099e-05	3.20106e-05	0.0221564	0.00564246
0.000199163	9.50332e-05	1.37609e-05	0.0205174	0.00589199
0.00011218	0.000116033	3.74409e-05	9.80649e-06	0.00579102
0.000135329	0.000130316	1.42459e-05	6.73014e-06	0.00748224
0.000173391	0.000155251	1.69192e-05	9.98315e-06	0.00832971
0.000207441	0.000140589	5.1751e-05	2.30906e-05	0.00886864
0.000286423	0.000193981	2.28133e-05	5.00513e-06	0.00950906
0.000246906	0.000184502	8.53639e-05	2.06532e-05	0.0125183
0.000372168	0.000249723	0.000153251	4.64359e-05	0.012782
0.000313148	0.000215387	4.95802e-05	7.23094e-05	0.0147099
0.000307771	0.000174908	0.000154052	6.1958e-05	0.0113603
0.000360869	0.000187973	0.000115227	0.000134039	0.0132178
0.000425293	0.000383737	8.77836e-05	7.96769e-05	9.79642e-06
0.000547263	0.000270366	0.000143458	9.31666e-05	2.51633e-06
0.000520889	0.000420102	0.000229876	0.00013882	1.33119e-05
0.000506254	0.000352382	0.000131658	7.63877e-05	7.60358e-06
0.000764287	0.000568063	0.000233466	0.00012849	1.43065e-05
0.000657089	0.000567001	0.000316397	0.000190775	2.52911e-05
0.00082497	0.00040797	0.000318283	0.000223792	2.52441e-05
0.000694751	0.000547771	0.000270108	0.000244722	3.09554e-05
0.000809943	0.00101738	0.000361179	0.000302538	2.33504e-05
0.000973982	0.000674866	0.000488022	0.00034295	0.000103422
0.000894116	0.000691913	0.000349858	0.000221635	8.04591e-05
0.00114004	0.000928309	0.000447529	0.000424685	0.000141209
0.00144088	0.00069537	0.000473179	0.000461701	8.89552e-05
0.00144921	0.000722975	0.000624634	0.000436883	0.000132217
0.00129193	0.00105472	0.000709506	0.000543326	0.000181675
0.00145743	0.00105616	0.000745796	0.000574924	0.000155317
0.00210779	0.00142474	0.000886562	0.000564863	0.00021444
0.0021452	0.00128453	0.000741409	0.000522012	0.000196977
0.00211232	0.00132564	0.00086205	0.000624297	0.000232145
0.00219269	0.00180546	0.00124948	0.000794381	0.000390978
0.00295373	0.00246845	0.00109649	0.000777178	0.000270937
0.00280443	0.00226583	0.00104115	0.000869626	0.000370849
0.00260472	0.00195499	0.00117645	0.00105396	0.000470241
0.00372185	0.00262803	0.00128284	0.00112476	0.000554696
0.00479698	0.00276977	0.0018577	0.00105509	0.000541129
0.0059655	0.00331891	0.00176893	0.00142864	0.000543984
0.00417991	0.00297952	0.00177272	0.00153739	0.00049945
0.00883948	0.00372848	0.00185925	0.00128966	0.000710577
0.00884354	0.00539277	0.00196202	0.00137939	0.000634312
0.0078183	0.00460449	0.00232905	0.0014378	0.000771181
0.00651324	0.00436487	0.00261049	0.00186351	0.000942572
0.00997302	0.00783793	0.00316247	0.0022533	0.000850976
0.0105282	0.00588468	0.0025728	0.00196992	0.00133165
0.0111546	0.00620263	0.00360792	0.00249946	0.00119279
0.0147678	0.00732387	0.00338313	0.00274641	0.00108869
0.0141954	0.00950961	0.00500477	0.00310669	0.0015618
0.0184591	0.0118903	0.00417297	0.00290975	0.00099994
0.0146307	0.00933635	0.00545605	0.00363767	0.0013488

## Sheet: All acorr - SE rate (per ms
5.08009e-06	4.42197e-06	1.51341e-06	3.86e-06	5.02595e-06
4.32437e-06	5.86772e-06	3.45516e-06	2.25674e-06	5.29618e-06
8.09899e-06	4.84401e-06	5.30546e-06	2.39986e-06	7.56804e-06
3.22097e-06	1.05125e-05	4.23111e-06	7.8843e-06	1.08372e-05
9.76196e-06	3.2449e-06	5.31926e-06	7.96492e-06	8.59689e-06
6.11263e-06	5.14414e-06	3.03966e-06	8.66957e-06	1.14862e-05
1.17828e-05	1.18055e-05	6.34332e-06	5.82566e-06	1.07402e-05
1.25386e-05	5.31851e-06	1.08931e-05	7.53955e-06	2.05303e-06
8.31142e-06	2.60996e-06	4.58622e-06	1.16581e-05	6.48749e-06
1.09287e-05	1.14075e-05	3.18358e-06	1.60614e-05	9.08065e-06
8.34219e-06	4.96517e-06	1.642e-05	1.50296e-05	1.12075e-05
1.04126e-06	1.33487e-06	1.41692e-05	3.73542e-06	1.32636e-05
1.12012e-05	9.20035e-06	1.62797e-05	1.73627e-05	1.81883e-05
6.6542e-06	9.04252e-06	2.66632e-05	6.16276e-06	6.57368e-06
1.36616e-05	1.70579e-06	2.31939e-05	9.79576e-06	1.77387e-05
1.47458e-05	1.72742e-05	1.99606e-05	1.43948e-05	4.87059e-06
3.53075e-05	1.00593e-05	1.39128e-05	9.37842e-06	1.00448e-05
1.83163e-05	1.60607e-05	1.15144e-05	8.92733e-06	9.96792e-06
1.30044e-05	6.57304e-06	5.14281e-06	1.40741e-05	1.20167e-05
4.89076e-06	2.0234e-05	2.09803e-05	7.77044e-06	2.02444e-05
4.3772e-06	2.09554e-05	1.54709e-05	1.0839e-05	1.3862e-05
1.93947e-05	1.42732e-05	3.61475e-05	2.76022e-05	1.05116e-05
2.4522e-05	4.2236e-05	1.55498e-05	2.55385e-05	1.8891e-05
1.62048e-05	9.72189e-06	2.36443e-05	1.5883e-05	2.30442e-05
3.06517e-05	1.92562e-05	3.78245e-05	2.23631e-05	1.49647e-05
2.1461e-05	2.45109e-05	2.98529e-05	2.54757e-05	2.07995e-05
2.57297e-05	2.93177e-05	3.88921e-05	5.28143e-05	1.84441e-05
3.07398e-05	3.35261e-05	3.56252e-05	1.55494e-05	3.30501e-05
3.76565e-05	3.06049e-05	3.44511e-05	1.99739e-05	3.34124e-05
3.89993e-05	3.21229e-05	4.7908e-05	1.61747e-05	4.65742e-05
2.63484e-05	4.15767e-05	6.1941e-05	3.27864e-05	2.1677e-05
3.16223e-05	4.05741e-05	3.17761e-05	3.18568e-05	8.33439e-06
6.77421e-05	3.07459e-05	1.62646e-05	5.37704e-05	1.91986e-05
3.16901e-05	4.47952e-05	4.4101e-05	5.1082e-05	2.91675e-05
6.35413e-05	2.77137e-05	3.25312e-05	4.33411e-05	1.47598e-05
3.6435e-05	9.30911e-05	3.36063e-05	2.65074e-05	3.49023e-05
1.78146e-05	0.00010623	9.79441e-05	5.4663e-05	2.44772e-05
3.6071e-05	0.000110871	3.47927e-05	2.99774e-05	2.70261e-05
7.30208e-05	0.000115335	5.14929e-05	6.33137e-05	4.14859e-05
8.55544e-05	5.17256e-05	0.000141282	5.92604e-06	9.20763e-05
0.00011822	8.93367e-05	5.47642e-05	4.48268e-05	9.08193e-06
9.43381e-05	0.00012677	0.000164403	5.63116e-05	8.47277e-05
6.28691e-05	9.15383e-05	9.18781e-05	4.69225e-05	4.32494e-05
2.04669e-05	0.000168981	0.000103318	0.000168408	5.97627e-05
0.000155268	0.000130258	0.000123902	9.90772e-05	4.35585e-05
0.000288923	0.000232058	0.000106791	0.000194636	8.87583e-05
1.00907e-05	0.000145357	9.99535e-05	0.000109303	7.32277e-05
0.000214263	0.000121619	8.61233e-05	9.37634e-05	5.31129e-05
0.000171356	0.000291407	1.29847e-05	0.000174421	0.000106018
7.02616e-05	0.000387539	0.000261862	0.00018153	3.32298e-05
0.000273961	0.000237576	0.000244618	0.000286326	0.000140335
0.000200942	0.000378004	0.000154877	0.000162255	3.19113e-05
8.85173e-05	0.000724123	0.000365589	0.000233033	0.000141053
0.000232794	0.000640925	0.000346505	0.000426076	9.73909e-05
0.000304109	0.000626805	0.000240993	0.000489934	0.00015388
0.000163318	0.000422025	0.000413327	0.000366382	8.75826e-05
0.000262726	0.000674505	7.38494e-05	0.000121759	0.000133747
0.000499179	0.000657049	0.00029205	7.38957e-05	0.000281522
0.000261839	0.00146373	0.000548313	0.000245784	0.000169076
0.000513035	0.000251868	0.000185379	0.000405375	0.000275708
0.000500327	0.000998824	0.000712182	0.000199708	0.000256161
0.000533728	0.00118963	0.000452146	6.53754e-05	0.000272809
0.00054268	0.000192443	0.000365308	0.00060636	0.000154344
0.000840391	0.000799127	0.000657953	0.000534306	0.000315286

## Sheet: All acorr - SD rate (per ms)
1.24436e-05	1.08316e-05	3.38409e-06	9.45503e-06	1.2311e-05
1.05925e-05	1.31206e-05	8.46337e-06	5.04623e-06	1.29729e-05
1.98384e-05	1.18654e-05	1.29957e-05	5.87843e-06	1.69226e-05
7.20231e-06	2.57502e-05	8.46222e-06	1.93125e-05	2.65456e-05
2.39118e-05	7.94836e-06	1.30295e-05	1.951e-05	2.1058e-05
1.49728e-05	1.26005e-05	6.79689e-06	2.1236e-05	2.81352e-05
2.88619e-05	2.89175e-05	1.55379e-05	1.30266e-05	2.63079e-05
3.07133e-05	1.30276e-05	2.66825e-05	1.8468e-05	5.02887e-06
2.03587e-05	5.21992e-06	1.02551e-05	2.85565e-05	1.5891e-05
2.67697e-05	2.79425e-05	7.79815e-06	3.93424e-05	2.22429e-05
2.04341e-05	1.21621e-05	4.02205e-05	3.68149e-05	2.74527e-05
2.32833e-06	2.66973e-06	3.47072e-05	8.35265e-06	3.2489e-05
2.74373e-05	2.25362e-05	3.98769e-05	4.25298e-05	4.4552e-05
1.48792e-05	2.21496e-05	6.53111e-05	1.37803e-05	1.61022e-05
3.3464e-05	3.81426e-06	5.68132e-05	2.1904e-05	4.34508e-05
3.61196e-05	4.2313e-05	4.88933e-05	3.52598e-05	1.0891e-05
8.64853e-05	2.46401e-05	3.11101e-05	2.29723e-05	2.46047e-05
4.48655e-05	3.93406e-05	2.82044e-05	2.18674e-05	2.44163e-05
3.18541e-05	1.31461e-05	1.02856e-05	3.44745e-05	2.94348e-05
9.78151e-06	4.9563e-05	5.1391e-05	1.55409e-05	4.95885e-05
1.07219e-05	5.133e-05	3.78958e-05	2.65501e-05	3.39548e-05
4.75072e-05	3.49622e-05	8.08282e-05	6.76113e-05	2.57481e-05
5.4833e-05	0.000103457	3.47704e-05	6.25562e-05	4.62734e-05
3.96934e-05	2.17388e-05	5.79165e-05	3.55155e-05	5.64464e-05
7.5081e-05	4.71679e-05	9.26506e-05	5.47782e-05	3.66559e-05
5.25685e-05	6.00393e-05	7.31244e-05	6.24023e-05	5.09481e-05
5.75333e-05	7.18134e-05	9.52657e-05	0.000129368	4.51786e-05
7.52968e-05	8.21218e-05	8.72635e-05	3.80881e-05	8.09559e-05
9.22393e-05	7.49664e-05	8.43875e-05	4.89259e-05	8.18434e-05
9.55283e-05	7.86848e-05	0.00011735	3.96197e-05	0.000114083
6.45401e-05	0.000101842	0.000151724	8.03099e-05	5.30976e-05
7.74586e-05	9.93857e-05	7.78353e-05	7.80328e-05	2.0415e-05
0.000165934	7.53117e-05	3.63686e-05	0.00013171	4.70268e-05
7.76246e-05	0.000109725	0.000108025	0.000125125	6.52205e-05
0.000155644	6.78844e-05	7.27421e-05	0.000106163	3.30039e-05
8.92471e-05	0.000228026	8.23183e-05	5.92724e-05	8.54928e-05
3.98347e-05	0.00026021	0.000239913	0.000133897	5.47326e-05
8.83556e-05	0.000271577	8.52245e-05	6.70315e-05	6.62001e-05
0.000178864	0.000282512	0.000126131	0.000155086	0.000101619
0.000209565	0.000115662	0.000346069	1.18521e-05	0.00022554
0.000289579	0.000218829	0.000109528	0.000100236	1.81639e-05
0.00023108	0.000310523	0.000402702	0.000137935	0.00020754
0.00014058	0.000224222	0.000225054	0.000114936	0.000105939
4.09339e-05	0.000377853	0.000253075	0.000412513	0.000146388
0.000380327	0.000319065	0.000303496	0.000242689	0.000106696
0.000707715	0.000568424	0.000261582	0.000476759	0.000217412
2.01814e-05	0.000356051	0.000244835	0.00024441	0.000179371
0.000524835	0.000297903	0.000210958	0.000209661	0.000118764
0.000419735	0.000713798	2.59693e-05	0.000427241	0.000237063
0.00015711	0.000949274	0.000641428	0.000444656	6.64595e-05
0.000671063	0.000531235	0.00059919	0.000701353	0.000343749
0.000492206	0.000925916	0.00037937	0.000397443	6.38226e-05
0.000197931	0.00177373	0.000895506	0.000570813	0.000315404
0.000570226	0.00156994	0.000848761	0.00104367	0.000238558
0.000744911	0.00140158	0.000590309	0.00120009	0.000376928
0.000365189	0.00103375	0.00101244	0.000897449	0.000195841
0.000643544	0.00165219	0.000165132	0.000298247	0.000327613
0.00122273	0.00160943	0.000715373	0.000147791	0.000689584
0.000641373	0.00358539	0.00134309	0.000602044	0.000414149
0.00125667	0.000503737	0.000454084	0.000906445	0.000675344
0.00122554	0.00244661	0.00174448	0.000446562	0.000627464
0.00130736	0.00291399	0.00110753	0.000130751	0.000668243
0.00132929	0.000384885	0.000894818	0.00148527	0.000378065
0.00205853	0.00195745	0.00161165	0.00130878	0.00077229

## Sheet: Amp by angle - Freq (per um)
0.2	0.7	1.2	1.7	2.2	2.7	3.2

## Sheet: Amp by angle - Angle (degrees)
0
5
10
15
20
25
30
35
40
45
50
55
60
65
70
75
80
85
90
95
100
105
110
115
120
125
130
135
140
145
150
155
160
165
170
175
180

[truncated: 5 more sheets: Amp by angle - Med amp (nm^3), Amp by angle - SE amp (nm^3), FilDenSTD - Angle (degrees), FilDenSTD - FilDensSTD (per nm), FilDenSTD - SE (per nm)]
