# Supplementary material for: Leading edge maintenance in migrating cells is an emergent property of branched actin network growth
Source: eLife journal article supplement (doi:10.7554/elife.74389), 2022-03-10
Supplement: fig5-data1 [file Figure 5-Source Data 4_BranchVar10.xlsx]

## Sheet: All acorr - Condition name
BranchAngle = 15	BranchAngle = 35	BranchAngle = 70	BranchAngle = 90	BranchAngle = 140

## Sheet: All acorr - Freq (per um)
0.05	0.05	0.05	0.05	0.05
0.1	0.1	0.1	0.1	0.1
0.15	0.15	0.15	0.15	0.15
0.2	0.2	0.2	0.2	0.2
0.25	0.25	0.25	0.25	0.25
0.3	0.3	0.3	0.3	0.3
0.35	0.35	0.35	0.35	0.35
0.4	0.4	0.4	0.4	0.4
0.45	0.45	0.45	0.45	0.45
0.5	0.5	0.5	0.5	0.5
0.55	0.55	0.55	0.55	0.55
0.6	0.6	0.6	0.6	0.6
0.65	0.65	0.65	0.65	0.65
0.7	0.7	0.7	0.7	0.7
0.75	0.75	0.75	0.75	0.75
0.8	0.8	0.8	0.8	0.8
0.85	0.85	0.85	0.85	0.85
0.9	0.9	0.9	0.9	0.9
0.95	0.95	0.95	0.95	0.95
1	1	1	1	1
1.05	1.05	1.05	1.05	1.05
1.1	1.1	1.1	1.1	1.1
1.15	1.15	1.15	1.15	1.15
1.2	1.2	1.2	1.2	1.2
1.25	1.25	1.25	1.25	1.25
1.3	1.3	1.3	1.3	1.3
1.35	1.35	1.35	1.35	1.35
1.4	1.4	1.4	1.4	1.4
1.45	1.45	1.45	1.45	1.45
1.5	1.5	1.5	1.5	1.5
1.55	1.55	1.55	1.55	1.55
1.6	1.6	1.6	1.6	1.6
1.65	1.65	1.65	1.65	1.65
1.7	1.7	1.7	1.7	1.7
1.75	1.75	1.75	1.75	1.75
1.8	1.8	1.8	1.8	1.8
1.85	1.85	1.85	1.85	1.85
1.9	1.9	1.9	1.9	1.9
1.95	1.95	1.95	1.95	1.95
2	2	2	2	2
2.05	2.05	2.05	2.05	2.05
2.1	2.1	2.1	2.1	2.1
2.15	2.15	2.15	2.15	2.15
2.2	2.2	2.2	2.2	2.2
2.25	2.25	2.25	2.25	2.25
2.3	2.3	2.3	2.3	2.3
2.35	2.35	2.35	2.35	2.35
2.4	2.4	2.4	2.4	2.4
2.45	2.45	2.45	2.45	2.45
2.5	2.5	2.5	2.5	2.5
2.55	2.55	2.55	2.55	2.55
2.6	2.6	2.6	2.6	2.6
2.65	2.65	2.65	2.65	2.65
2.7	2.7	2.7	2.7	2.7
2.75	2.75	2.75	2.75	2.75
2.8	2.8	2.8	2.8	2.8
2.85	2.85	2.85	2.85	2.85
2.9	2.9	2.9	2.9	2.9
2.95	2.95	2.95	2.95	2.95
3	3	3	3	3
3.05	3.05	3.05	3.05	3.05
3.1	3.1	3.1	3.1	3.1
3.15	3.15	3.15	3.15	3.15
3.2	3.2	3.2	3.2	3.2
3.25	3.25	3.25	3.25	3.25

## Sheet: All acorr - Med amp (nm^3)
1.40536e+06	1.30314e+06	2.15535e+06	2.89392e+06	1.7429e+07
1.30815e+06	1.15481e+06	2.43384e+06	7.07502e+06	2.97584e+06
901895	1.44307e+06	1.89289e+06	2.2049e+06	4.38072e+06
454392	829802	1.84761e+06	2.85755e+06	2.7698e+06
919139	627845	894350	2.41244e+06	2.0458e+06
341783	1.0061e+06	1.70915e+06	1.62112e+06	1.32526e+06
390373	359214	626777	1.23283e+06	1.0493e+06
316692	287667	485881	715010	777188
232589	323340	484120	440499	683352
163953	174319	440032	453358	493504
117901	220727	265908	287636	397762
97008	179761	233063	245438	287650
89916.7	147073	198039	172269	251900
97219.3	96375.7	146826	149900	219131
81104.4	119781	129859	153938	170577
60470.9	70646.4	106944	107591	119549
48006.9	66078	77869	74571.6	118960
43198.5	47301.4	83418.9	69146.5	92693.3
39408.6	51460.7	58710.5	56567.3	71883.4
28299.6	36762.6	47182.4	44176.2	65481.2
24440.7	30750.6	36728.2	34208.1	55007.3
21284.7	22461.3	33445.6	31630	45748.6
19881.2	19898	26259.9	26935.3	41600.3
15358.7	20130.2	19923.7	22619.6	29242.8
13047.4	17013.9	18704.3	19803.7	24720.9
12581	13660.4	15572.9	16541.1	21677.5
9842.04	10809.1	12093.1	13106.9	18022
9657.97	11120	11673.7	11495.8	15780.2
8384.42	9232.32	9475.53	8671.07	13419.1
6818.55	7544.4	8070.16	9273.14	11174.6
6182.29	6129.26	6986.76	6754.27	9495.57
5512.29	5466.23	6487.81	5963.82	7825.05
5018.22	4711.6	5126.18	5173.97	7010.7
3692.36	4025.08	4162.38	4702.22	6039.5
3471.31	3800.72	4110.56	3987.25	4971.5
2869.89	3232.66	3483.4	3449.45	4398.97
2518.31	2482.37	2666.59	2841.66	3962.77
2494.5	2418.99	2481.69	2492.54	3075.72
2063.26	2026.63	2141.62	2211.96	2797.94
1988.05	1708.71	1835.73	1909.81	2428.24
1657.59	1485.86	1665.26	1680.12	2078.56
1559.71	1384.14	1340.99	1483.98	1779.34
1280.72	1274.93	1208.57	1270.98	1632.3
1164.02	1083.34	1101.85	1140.72	1475.37
951.156	873.248	895.658	1012.78	1186.52
855.857	805.208	815.383	883.096	1040.39
785.444	730.522	744.664	750.697	996.638
707.577	596.152	641.2	664.086	831.62
606.367	590.645	588.996	584.62	700.114
546.12	512.23	519.271	534.453	636.671
510.612	472.552	452.578	463.8	556.299
459.613	419.204	417.169	447.987	506.471
393.469	369.995	370.696	383.023	427.199
356.079	334.406	348.289	354.975	413.781
314.951	300.775	311.026	301.622	369.437
295.833	270.186	270.549	273.5	322.391
260.656	240.514	237.022	249.942	289.257
242.696	216.62	237.724	225.629	258.57
218.948	202.196	207.934	200.946	219.175
197.716	183.493	180.562	183.686	199.813
183.76	169.028	173.382	163.242	187.681
171.976	152.499	160.022	152.112	170.066
155.847	140.22	139.561	139.097	157.004
144.422	124.548	133.321	125.598	138.766
130.651	116.027	119.277	114.936	129.012

## Sheet: All acorr - SE amp (nm^3)
93022.2	220396	615027	365774	3.56872e+06
386184	67910.1	133122	3.1554e+06	1.35421e+06
116384	330700	660515	350814	295829
187111	222033	289512	596682	668164
127861	163876	211390	234882	450282
100432	220699	303043	206928	56291.5
61467.2	77552.8	97068.2	183659	199999
30748.2	39272.3	64283.5	24170.9	30633.5
58084.2	13130.4	68683	69912.4	69737
17110.3	7004.44	60888.3	43873.7	42736.9
4844.98	33873.1	32686	20692.6	22572.6
9091.25	16116.1	32446.1	35442.5	10959.9
5620.48	16497.1	33431.5	17560.4	17445.2
3463.85	6839.63	6759.96	10426.5	11773.3
9798.02	14081.3	12505.6	7823.36	6013.61
7193.23	9177.37	6267.47	9378.34	4682.26
1835.42	4883.71	6856.34	1367.8	4826.05
3359.71	2943.74	4618.26	6057.5	3782.28
4751.64	705.475	3171.24	3687.68	2680.8
1256.99	3134.65	4078.03	2218.3	3366.92
1909.72	1930.58	2044.03	2299.44	1828.16
1040.69	1588.04	900.725	3122.18	623.69
622.241	2487.15	794.112	1090.55	1065.77
222.659	665.259	612.494	822.866	1502.35
805.202	772.007	1229.96	582.895	303.646
259.786	909.574	684.18	863.82	486.514
257.914	765.083	101.274	740.224	892.456
586.969	1013.41	413.758	466.486	218.461
339.473	403.946	268.283	488.881	545.105
300.5	608.797	235.457	251.327	230.64
121.05	201.674	198.761	120.318	233.941
329.856	81.5928	228.645	171.045	328.423
243.544	157.199	351.78	135.954	41.4473
65.4931	187.23	219.668	91.3031	120.082
179.501	209.166	44.1369	64.0201	162.931
65.7151	148.757	39.4751	66.9205	126.632
134.144	83.0557	66.7624	62.9203	134.831
84.6307	80.7103	74.1097	16.4741	106.461
43.0836	30.7157	77.5542	22.9449	59.3414
83.6526	127.518	130.669	63.5945	16.4931
109.984	41.5617	16.4818	68.9504	55.1638
4.64093	49.6975	52.7199	53.3084	28.423
65.29	16.2015	31.5142	36.8392	32.2511
31.1218	28.3073	38.9256	28.4894	6.35717
19.0323	49.5904	19.9545	24.4935	35.666
31.1538	20.2562	19.9801	25.6535	34.0919
8.39145	7.27378	18.6887	3.82897	28.9026
15.7202	20.478	10.0352	15.8534	30.7261
6.58549	16.9828	3.02662	10.5082	13.985
16.2716	16.3869	10.5344	11.7857	12.7123
18.3047	15.8832	7.05575	7.64732	8.10502
7.12507	8.64106	11.8123	9.90762	8.77962
3.33543	13.8663	9.20458	11.3072	12.2355
0.78452	7.78723	3.02929	7.70696	9.78356
3.85793	8.57683	3.6471	0.834974	9.85525
6.09239	5.5483	5.16672	3.02399	7.75371
4.57702	2.53106	3.50015	6.95987	8.56755
6.06095	3.16095	4.45897	3.70554	8.01385
5.83869	2.79491	4.92061	2.66039	3.42375
1.74837	4.42083	2.01391	2.9813	5.32077
2.10219	2.47226	2.19366	2.67724	1.65313
1.51243	1.93295	3.02325	2.40549	4.37121
3.09882	2.06931	1.74588	0.72987	1.9083
0.911957	1.78773	1.28065	0.836209	3.52162
1.87211	1.89584	4.39556	1.6249	2.03393

## Sheet: All acorr - SD amp (nm^3)
186044	539858	1.5065e+06	817896	7.97989e+06
945954	135820	297670	7.72913e+06	3.0281e+06
232768	810046	1.47696e+06	784444	661494
458327	543867	709156	1.46157e+06	1.63666e+06
313193	401413	517799	575340	1.10296e+06
224573	540600	742301	506867	125872
150563	189965	237768	449872	489894
75317.5	87815.6	157462	59206.4	68498.6
142277	26260.8	168238	171250	170820
41911.5	14008.9	149145	107468	104684
10833.7	82971.9	80064	50686.4	55291.2
20328.6	39476.2	79476.4	86816	24507.1
12567.8	40409.6	81890.2	43014.1	42731.7
7745.4	15293.9	15115.7	25539.6	28838.6
24000.2	34492.1	30632.4	19163.2	14730.3
17619.7	22479.9	15352.1	22972.1	11469.1
4495.83	11962.6	16794.5	2735.59	11821.4
8229.57	7210.67	10326.7	14837.8	9264.66
11639.1	1577.49	7767.91	9032.93	6566.6
2810.71	7678.28	9989.08	5433.69	8247.24
4677.83	4728.94	5006.84	5632.46	4478.05
2549.17	3889.89	2206.32	7647.74	1247.38
1391.37	6092.25	1945.17	2671.3	2383.13
445.319	1629.55	1369.58	2015.6	3359.35
1972.33	1891.02	3012.77	1303.39	678.974
519.573	2227.99	1675.89	2115.92	1191.71
515.828	1874.06	202.547	1813.17	2186.06
1437.77	2482.34	1013.5	1142.65	488.495
831.535	989.462	657.157	1197.51	1335.23
736.073	1491.24	576.75	615.623	515.727
296.512	493.999	444.444	294.718	573.037
807.978	163.186	560.064	418.974	804.469
596.559	385.057	861.681	304.003	82.8945
146.447	458.619	538.075	204.16	294.14
439.687	512.351	88.2739	143.153	399.098
146.943	364.378	88.2689	163.921	310.185
328.584	203.444	149.285	140.694	330.268
189.24	197.699	181.531	36.8372	260.775
105.533	68.6825	189.968	56.2033	145.356
204.906	312.355	320.073	155.774	36.8798
269.405	101.805	36.8545	168.893	135.123
10.3774	121.733	129.137	130.578	63.5558
159.927	32.403	77.1936	90.2372	78.9987
76.2326	69.3385	95.3479	69.7844	12.7143
46.6194	121.471	44.6196	59.9966	87.3635
76.3109	49.6173	48.941	62.8381	83.5078
20.5548	17.817	45.7778	7.65795	70.7966
38.5065	50.1606	24.581	38.8326	75.2633
14.7256	41.5991	6.05325	25.7397	34.2562
39.857	40.1395	25.8038	28.8691	31.1387
44.8371	38.9057	17.283	18.732	18.1234
15.9321	21.1662	28.9342	24.2686	21.5056
7.45824	33.9654	22.5465	27.6968	29.9708
1.56904	19.0747	6.77369	18.8781	23.9647
9.44997	21.0089	8.93353	1.66995	24.1403
14.9232	13.5905	12.6558	6.76184	18.9926
11.2114	6.19981	8.57358	17.0481	20.9861
14.8462	7.74272	9.97056	9.07669	19.6299
14.3018	6.84611	12.053	6.51661	7.65574
3.90947	10.8288	4.50325	7.30266	13.0332
4.70063	6.05578	4.90517	6.55786	3.69652
3.3819	4.73473	7.40543	5.89223	10.7072
7.59054	5.06874	4.2765	1.45974	4.67437
2.0392	3.99749	2.86362	1.86982	8.62618
4.58571	4.64383	10.7669	3.98018	4.98209

## Sheet: All acorr - Med rate (per ms)
0.0213721	0.0147146	0.0069259	0.00403141	0.00140042
0.0210579	0.0182409	0.00896524	0.00562415	0.00160795
9.80161e-06	0.0179568	0.00849141	0.00530158	0.00203387
7.39229e-06	0.0170517	0.0086808	0.00559657	0.00162237
1.17904e-05	0.0205547	0.0113061	0.00844732	0.00211029
8.27461e-06	0.0216901	0.0131715	0.00990291	0.00214486
4.09329e-05	9.80113e-06	0.013119	0.0102071	0.00313067
2.285e-05	1.30623e-05	0.0159331	0.0114665	0.00320612
1.53737e-05	1.89896e-05	0.0155951	0.011521	0.00347612
5.25925e-05	1.05968e-05	0.0166943	0.0127189	0.00403551
2.09798e-05	1.45721e-05	0.0182983	0.0143445	0.00364662
7.27387e-05	2.84454e-05	0.0184239	0.0197327	0.00626781
0.000116747	2.17532e-05	0.0240807	0.0179098	0.00431002
0.000139665	5.53562e-05	9.79347e-06	0.0193034	0.00475973
0.000199302	3.0819e-05	4.84083e-06	0.0192081	0.00901432
0.000125328	7.45924e-05	9.78714e-06	0.0222017	0.00866102
0.000105323	0.000111902	4.59222e-05	0.0254755	0.00911229
0.000147345	0.000120557	6.80406e-05	9.80372e-06	0.0103653
0.000183345	0.000122741	8.29925e-05	6.44406e-06	0.00806163
0.000232902	9.7309e-05	8.85546e-05	2.54546e-05	0.0120098
0.000203185	0.000128731	3.86627e-05	1.38545e-05	0.0118608
0.000209458	0.000180983	6.94042e-05	8.61802e-05	0.0152604
0.000276531	0.000198148	0.000104571	9.272e-06	0.0148216
0.000297245	0.000240642	4.99488e-05	6.76474e-05	0.0154052
0.000331424	0.000253423	8.64334e-05	4.06375e-05	0.0186841
0.000366406	0.000262137	0.000135002	1.94026e-05	0.0216922
0.000412904	0.000288809	8.98167e-05	0.000114049	0.0217295
0.000363788	0.000291225	0.000164483	6.55686e-05	9.79347e-06
0.000439753	0.000345436	0.000174335	0.000110242	2.93175e-05
0.000486198	0.000418592	0.000219352	0.000117474	4.44959e-05
0.000667572	0.000297121	0.000160357	0.000100564	3.2621e-05
0.000654195	0.000514679	0.000277591	0.0001149	2.31944e-05
0.000579036	0.000567484	0.000277693	0.000137584	1.17586e-05
0.000655804	0.000470709	0.000395412	0.000246767	4.46102e-05
0.000760874	0.000429776	0.000354891	0.000315312	0.000127139
0.000690859	0.000446368	0.000414693	0.000186113	7.50036e-05
0.000941896	0.00060156	0.000319197	0.000222175	8.73564e-05
0.00112515	0.000720967	0.000340744	0.000348691	9.55603e-05
0.00114064	0.000733997	0.000426736	0.000271673	5.9801e-05
0.0010665	0.000678248	0.000427345	0.000222545	0.000196566
0.0012854	0.000886956	0.00051873	0.000319801	0.000105952
0.00194497	0.000829481	0.00040419	0.000379436	0.000184177
0.00142913	0.000958836	0.000564433	0.000370378	0.000126056
0.00173629	0.000944872	0.000559859	0.000464496	0.000190499
0.00272968	0.00109383	0.000607097	0.000624115	0.000229188
0.00227952	0.00161752	0.000737019	0.000580785	0.000184904
0.00228709	0.00144067	0.000858035	0.00060012	0.000309679
0.00334137	0.001398	0.000926398	0.000691891	0.000237168
0.00342999	0.00215213	0.000948596	0.00103476	0.00036937
0.0030456	0.00202425	0.00088385	0.000725821	0.000333449
0.00548872	0.00164357	0.00133511	0.000703476	0.000406431
0.00606067	0.00220369	0.00098567	0.00134557	0.000356507
0.00499659	0.00263334	0.00133756	0.00114683	0.000598209
0.00631978	0.0036754	0.00106947	0.0010068	0.000558664
0.00784291	0.00441697	0.00168882	0.00135312	0.000415825
0.00926904	0.00350504	0.0023158	0.00151456	0.000527673
0.0105995	0.00453099	0.00223408	0.00138471	0.00063982
0.0126231	0.0048589	0.00227703	0.00182387	0.000765733
0.0108682	0.00736264	0.00277592	0.00173665	0.000903183
0.0136397	0.00706036	0.00291103	0.00295256	0.000872123
0.0158353	0.00799649	0.00346253	0.00237335	0.000777194
0.0166842	0.00999635	0.00423739	0.00258991	0.000874832
0.0169797	0.014435	0.00539769	0.00336229	0.00106029
0.021748	0.0112317	0.00411348	0.00438958	0.00109203
0.0222824	0.0118441	0.00654506	0.00370753	0.00133811

## Sheet: All acorr - SE rate (per ms
2.15547e-06	2.56362e-06	7.71014e-06	3.69855e-06	3.52897e-06
5.14194e-06	5.50402e-06	1.77572e-06	2.79225e-06	1.27206e-05
1.12669e-05	3.67508e-06	3.78725e-06	3.77794e-06	4.41967e-06
2.19464e-06	3.60152e-06	1.80695e-06	5.63488e-06	1.42875e-05
1.15942e-05	6.21409e-06	1.08147e-05	1.50153e-06	1.65588e-05
7.77179e-07	1.12684e-05	4.84069e-06	4.9764e-06	9.80118e-06
9.35663e-06	2.82596e-06	6.30582e-06	7.43005e-06	1.64438e-05
1.13261e-05	1.28512e-05	1.11627e-05	2.37083e-06	4.31286e-06
1.77464e-05	1.25312e-05	1.15529e-05	1.29484e-05	5.99815e-06
1.01417e-05	8.32432e-06	9.18071e-06	6.96507e-06	3.67164e-06
6.58013e-06	2.58832e-06	8.74405e-06	5.71509e-06	1.00518e-05
3.46386e-06	1.06933e-05	1.44864e-05	1.67196e-05	9.55315e-06
3.94172e-06	1.67152e-05	1.56397e-05	1.07982e-05	8.98443e-06
1.10435e-05	1.6428e-05	1.85432e-05	9.29846e-06	1.33416e-05
1.97749e-05	2.64149e-05	4.02298e-06	1.11423e-05	1.20146e-05
1.51648e-05	1.23945e-05	2.28046e-05	1.45846e-05	7.18925e-06
8.15051e-06	1.45561e-05	2.45614e-05	1.69341e-05	8.4633e-06
2.55245e-05	9.14214e-06	1.45126e-05	2.01774e-05	9.35762e-06
2.26936e-05	1.72909e-05	1.90015e-05	1.81625e-05	1.70081e-05
2.28397e-05	2.04544e-05	6.6102e-06	2.8568e-05	1.00835e-05
1.22288e-05	2.79162e-06	1.6521e-05	2.45051e-05	1.12318e-05
2.64279e-06	4.32168e-05	1.02728e-05	1.3436e-05	9.09617e-06
1.87706e-05	1.2487e-05	2.11601e-05	4.4448e-06	2.50707e-05
3.7414e-05	2.37439e-05	9.26037e-06	1.12211e-05	2.34719e-05
3.28915e-05	1.3851e-05	2.42425e-05	2.46667e-05	2.46763e-05
8.35667e-06	3.2367e-05	2.21943e-05	2.8841e-05	2.43502e-05
2.50213e-05	3.86132e-05	2.35466e-05	9.4505e-06	2.99752e-05
1.69527e-05	1.89194e-06	1.70813e-05	3.85119e-05	2.81927e-05
2.28347e-05	5.40044e-05	8.30631e-06	3.25043e-05	4.22073e-05
1.85986e-05	2.64429e-05	4.69176e-05	3.531e-05	5.92332e-06
3.91581e-05	3.63278e-05	3.68363e-05	2.65105e-05	2.35178e-05
1.01561e-05	3.16472e-05	7.48438e-05	2.60504e-05	3.84409e-05
1.13427e-05	5.58811e-05	4.56147e-05	4.22444e-05	2.02387e-05
3.76017e-05	5.78205e-05	5.79148e-05	3.62301e-05	5.23963e-05
5.91043e-06	4.67556e-05	8.1111e-06	2.21887e-05	3.19069e-05
4.18939e-05	7.88687e-05	5.69148e-05	3.87246e-05	1.60534e-05
4.22618e-05	3.54772e-05	6.42821e-05	3.61121e-05	2.16353e-05
1.5339e-05	1.03505e-05	7.74406e-05	5.30606e-05	4.4463e-05
6.84779e-05	0.000128658	0.000134245	7.00316e-05	2.66557e-05
0.000148624	5.12192e-05	9.28816e-05	0.00010258	4.97108e-05
3.425e-05	0.000146158	0.00017009	0.000105805	6.46552e-05
0.000140297	0.000152826	8.37432e-05	0.000106876	5.43594e-05
6.83278e-05	0.000159784	0.000199404	4.4987e-05	6.7799e-05
7.94085e-05	0.000286636	6.26231e-05	0.000107433	7.80618e-05
8.07342e-05	0.000234338	0.000109928	3.43249e-05	7.74804e-05
9.31361e-05	6.19668e-05	0.000140244	9.20365e-05	6.76137e-05
7.01523e-05	0.000257324	0.000251893	0.000206381	0.000137667
0.0001591	0.00025726	7.51449e-05	0.000117956	0.000125298
0.000133235	6.69019e-05	0.000190256	0.000177102	4.8422e-05
0.000183523	0.000215891	0.000354482	0.000181044	0.000133558
0.0002371	0.000258584	0.000368357	6.52518e-05	6.86662e-05
0.000290941	0.000539556	0.000588772	0.000398054	5.26666e-05
0.000197544	0.000765984	4.53844e-05	0.000309347	0.000201945
0.000149446	0.000237765	0.000276578	0.000345519	0.000184852
0.000208173	0.000329186	0.000342814	0.000546103	0.000244456
0.000400119	0.000598675	0.000302153	0.000191152	0.000233551
0.000497578	0.000460445	0.000712434	0.000261324	0.000391386
0.000599678	0.000201322	0.00061372	0.000463248	9.63028e-05
0.00039215	0.000715553	0.000454649	0.00046396	8.45721e-05
0.000413828	0.000865354	0.000461061	0.000611546	0.000323798
8.6133e-05	0.000897601	0.000369078	0.000186798	0.000275352
0.00115509	0.000426552	0.000698619	0.000422888	0.000421363
0.000701763	0.000802114	0.000824697	0.000282477	0.000367855
0.000293055	0.00137498	0.00105162	0.000108693	0.00029779

## Sheet: All acorr - SD rate (per ms)
4.81977e-06	5.12723e-06	1.88859e-05	9.05955e-06	7.89101e-06
1.14977e-05	1.23074e-05	3.97063e-06	5.5845e-06	3.1159e-05
2.75981e-05	9.00207e-06	9.27682e-06	9.25403e-06	1.08259e-05
4.90736e-06	8.82189e-06	4.04047e-06	1.26e-05	3.4997e-05
2.83998e-05	1.52214e-05	2.64906e-05	3.35753e-06	4.05607e-05
1.55436e-06	2.76018e-05	1.08241e-05	1.11276e-05	2.40079e-05
2.2919e-05	6.31903e-06	1.41002e-05	1.81998e-05	4.02789e-05
2.77432e-05	3.1479e-05	2.7343e-05	5.30134e-06	9.64385e-06
4.34697e-05	3.06951e-05	2.82988e-05	3.1717e-05	1.34123e-05
2.4842e-05	2.03903e-05	2.24881e-05	1.70609e-05	8.21004e-06
1.47136e-05	5.17663e-06	2.14185e-05	1.39991e-05	2.46218e-05
7.74542e-06	2.61932e-05	3.54842e-05	4.09544e-05	2.34003e-05
8.81396e-06	4.09436e-05	3.83093e-05	2.41454e-05	2.20073e-05
2.70509e-05	4.02402e-05	4.54214e-05	2.27765e-05	3.268e-05
4.4218e-05	6.47029e-05	8.99566e-06	2.72929e-05	2.94297e-05
3.71461e-05	3.03601e-05	5.58597e-05	3.57248e-05	1.761e-05
1.82251e-05	3.5655e-05	6.0163e-05	4.14799e-05	2.07308e-05
6.25221e-05	2.04424e-05	3.24512e-05	4.94244e-05	2.09243e-05
5.55877e-05	4.2354e-05	4.24886e-05	4.44889e-05	4.16611e-05
5.59455e-05	5.01028e-05	1.61916e-05	6.99769e-05	2.46994e-05
2.99543e-05	5.58323e-06	4.04679e-05	6.00251e-05	2.75123e-05
5.28558e-06	0.000105859	2.29707e-05	3.29114e-05	2.03397e-05
4.59785e-05	3.05868e-05	5.18315e-05	8.8896e-06	6.14105e-05
9.16453e-05	5.81605e-05	2.07068e-05	2.50911e-05	5.74942e-05
8.05673e-05	3.09718e-05	5.93817e-05	6.04208e-05	6.04443e-05
1.67133e-05	7.92826e-05	5.43648e-05	7.06457e-05	5.96455e-05
5.59494e-05	9.45825e-05	5.76772e-05	2.1132e-05	7.34239e-05
4.15254e-05	4.23051e-06	4.18404e-05	9.43345e-05	6.90576e-05
5.59334e-05	0.000132283	1.85735e-05	7.96188e-05	0.000103386
4.55571e-05	6.47716e-05	0.000114924	8.64915e-05	1.3245e-05
9.59174e-05	8.89847e-05	9.02301e-05	6.49372e-05	5.25873e-05
2.27098e-05	7.75195e-05	0.000183329	5.82505e-05	9.41607e-05
2.77839e-05	0.00013688	0.000111733	0.000103477	4.95746e-05
8.40798e-05	0.000141631	0.000129502	8.87452e-05	0.000128344
1.18209e-05	0.000114527	1.8137e-05	4.96154e-05	7.81556e-05
9.36776e-05	0.000193188	0.000139412	9.48554e-05	3.58965e-05
0.00010352	7.93294e-05	0.000143739	8.84561e-05	4.83779e-05
3.75727e-05	2.07009e-05	0.00018969	0.000129971	0.000108912
0.000167736	0.000315147	0.000328832	0.000171542	6.52929e-05
0.000364052	0.00011453	0.000227513	0.000251268	0.000121766
7.65854e-05	0.000358013	0.000416635	0.000259168	0.000158372
0.000313713	0.000374346	0.000205128	0.000261791	0.000133153
0.000167368	0.000391388	0.000488438	0.000100594	0.000151603
0.00019451	0.000702113	0.000125246	0.000263157	0.000191212
0.000197758	0.000574008	0.000245807	6.86497e-05	0.000189788
0.000228136	0.000151787	0.000343527	0.000225442	0.000151189
0.000171837	0.000630313	0.000617008	0.000505529	0.000337214
0.000389713	0.000630155	0.00015029	0.000288931	0.000306917
0.000297922	0.000133804	0.000466031	0.000433808	0.000118609
0.00041037	0.000482747	0.0008683	0.000443464	0.00032715
0.000580774	0.000633398	0.000902286	0.000130504	0.000153542
0.000712656	0.00132164	0.00144219	0.00097503	0.000117766
0.000483883	0.00187627	9.07689e-05	0.000757742	0.000494663
0.000366067	0.00053166	0.000618447	0.000846345	0.000452794
0.000509919	0.000806338	0.000839719	0.00133767	0.000598791
0.000980088	0.00146645	0.000740121	0.000468224	0.00057208
0.00121881	0.00112785	0.0017451	0.000640111	0.000958695
0.00146891	0.000493137	0.0015033	0.00113472	0.000192606
0.000960567	0.00160003	0.00111366	0.00113646	0.000189109
0.00101367	0.00211968	0.00112936	0.00149798	0.000793141
0.000172266	0.00219867	0.000904053	0.000457559	0.000674472
0.00282938	0.0009538	0.00171126	0.00103586	0.00103212
0.00171896	0.00196477	0.00202009	0.000691925	0.000901058
0.000655291	0.00336799	0.00257593	0.000243045	0.000729434

## Sheet: Amp by angle - Freq (per um)
0.2	0.7	1.2	1.7	2.2	2.7	3.2

## Sheet: Amp by angle - Angle (degrees)
0
5
10
15
20
25
30
35
40
45
50
55
60
65
70
75
80
85
90
95
100
105
110
115
120
125
130
135
140
145
150
155
160
165
170
175
180

[truncated: 5 more sheets: Amp by angle - Med amp (nm^3), Amp by angle - SE amp (nm^3), FilDenSTD - Angle (degrees), FilDenSTD - FilDensSTD (per nm), FilDenSTD - SE (per nm)]
